# Supplementary material for: Thermodynamic versus kinetic control in substituent redistribution reactions of silylium ions steered by the counteranion
Source: PubMed Central journal article supplement (PMC6048699; doi:10.1039/c8sc01833b), 2018-05-21
Supplement: SC-009-C8SC01833B-s001.pdf [file SC-009-C8SC01833B-s001.pdf]

## Thermodynamic versus kinetic control in substituent redistribution reactions of silylium ions steered by the counteranion

Lukas Omann,<sup>a</sup> Bimal Pudasaini,<sup>b</sup> Elisabeth Irran,<sup>a</sup> Hendrik F. T. Klare,<sup>a</sup> Mu-Hyun Baik<sup>\*,b,c</sup> and Martin Oestreich<sup>\*,a</sup>

<sup>a</sup>*Institut für Chemie, Technische Universität Berlin,  
Strasse des 17. Juni 115, 10623 Berlin, Germany*

<sup>b</sup>*Center for Catalytic Hydrocarbon Functionalizations, Institute for Basic Science (IBS)  
Daejeon, 34141, Republic of Korea*

<sup>c</sup>*Department of Chemistry, Korea Advanced Institute of Science and Technology (KAIST),  
Daejeon, 34141, Republic of Korea*

*mbaik2805@kaist.ac.kr  
martin.oestreich@tu-berlin.de*

## Supporting Information

### Table of Contents

|          |                                                                                                                                                                                                                                                 |            |
|----------|-------------------------------------------------------------------------------------------------------------------------------------------------------------------------------------------------------------------------------------------------|------------|
| <b>1</b> | <b>General Information</b>                                                                                                                                                                                                                      | <b>S4</b>  |
| <b>2</b> | <b>Experimental Details for the Synthesis of Various Hydrosilanes</b>                                                                                                                                                                           | <b>S5</b>  |
| 2.1      | Dimethyl(2,3,4,5,6-pentamethylphenyl)silane                                                                                                                                                                                                     | S5         |
| 2.2      | Benzyl(dimethyl)silane                                                                                                                                                                                                                          | S6         |
| 2.3      | Diisopropyl(phenyl)silane                                                                                                                                                                                                                       | S7         |
| 2.4      | Di- <i>tert</i> -butyl(phenyl)silane                                                                                                                                                                                                            | S7         |
| <b>3</b> | <b>Experimental Details for the Synthesis of <math>\text{Ph}_3\text{C}^+[\text{CHB}_{11}\text{H}_5\text{Br}_6]^-</math></b>                                                                                                                     | <b>S8</b>  |
| 3.1      | $\text{Ag}^+[\text{CHB}_{11}\text{H}_5\text{Br}_6]^-$                                                                                                                                                                                           | S8         |
| 3.2      | $\text{Ph}_3\text{C}^+[\text{CHB}_{11}\text{H}_5\text{Br}_6]^-$                                                                                                                                                                                 | S9         |
| <b>4</b> | <b>General Procedures for the Generation of Silylium Ions</b>                                                                                                                                                                                   | <b>S10</b> |
| 4.1      | General Procedure for the Generation of Silylium Ions using $\text{Ph}_3\text{C}^+[\text{B}(\text{C}_6\text{F}_5)_4]^-$<br>(GP 1)                                                                                                               | S10        |
| 4.2      | General Procedure for the Generation of Silylium Ions using<br>$\text{Ph}_3\text{C}^+[\text{CHB}_{11}\text{H}_5\text{Br}_6]^-$ (GP 2)                                                                                                           | S10        |
| <b>5</b> | <b>Experimental Details for the Hydride Abstraction of Various Hydrosilanes<br/>using <math>\text{Ph}_3\text{C}^+[\text{B}(\text{C}_6\text{F}_5)_4]^-</math> and <math>\text{Ph}_3\text{C}^+[\text{CHB}_{11}\text{H}_5\text{Br}_6]^-</math></b> | <b>S11</b> |
| 5.1      | Reaction of $\text{Me}(\text{C}_6\text{Me}_5)_2\text{SiH}$ with $\text{Ph}_3\text{C}^+[\text{B}(\text{C}_6\text{F}_5)_4]^-$ : Generation of<br>$(\text{C}_6\text{Me}_5)_3\text{Si}^+[\text{B}(\text{C}_6\text{F}_5)_4]^-$ (Table 1, Entry 1)    | S11        |

|          |                                                                                                                                                                                                                                                                                                           |            |
|----------|-----------------------------------------------------------------------------------------------------------------------------------------------------------------------------------------------------------------------------------------------------------------------------------------------------------|------------|
| 5.2      | Reaction of $\text{Me}(\text{C}_6\text{Me}_5)_2\text{SiH}$ with $\text{Ph}_3\text{C}^+[\text{CHB}_{11}\text{H}_5\text{Br}_6]^-$ : Generation of $(\text{C}_6\text{Me}_5)_3\text{Si}^+[\text{CHB}_{11}\text{H}_5\text{Br}_6]^-$ (Table 1, Entry 2)                                                         | S12        |
| 5.3      | Reaction of $\text{MePh}_2\text{SiH}$ with $\text{Ph}_3\text{C}^+[\text{B}(\text{C}_6\text{F}_5)_4]^-$ (Table 1, Entry 3)                                                                                                                                                                                 | S12        |
| 5.4      | Reaction of $\text{MePh}_2\text{SiH}$ with $\text{Ph}_3\text{C}^+[\text{CHB}_{11}\text{H}_5\text{Br}_6]^-$ : Generation of $\text{MePh}_2\text{Si}^+[\text{CHB}_{11}\text{H}_5\text{Br}_6]^-$ with Small Amounts of $\text{Me}_2\text{PhSi}^+[\text{CHB}_{11}\text{H}_5\text{Br}_6]^-$ (Table 1, Entry 4) | S13        |
| 5.5      | Reaction of $\text{Me}_2\text{PhSiH}$ with $\text{Ph}_3\text{C}^+[\text{B}(\text{C}_6\text{F}_5)_4]^-$ (Table 1, Entry 5)                                                                                                                                                                                 | S14        |
| 5.6      | Reaction of $\text{Me}_2\text{PhSiH}$ with $\text{Ph}_3\text{C}^+[\text{CHB}_{11}\text{H}_5\text{Br}_6]^-$ : Generation of $\text{Me}_3\text{Si}^+[\text{CHB}_{11}\text{H}_5\text{Br}_6]^-$ (Table 1, Entry 6)                                                                                            | S14        |
| 5.7      | Reaction of $\text{Me}_2(\text{C}_6\text{Me}_5)\text{SiH}$ with $\text{Ph}_3\text{C}^+[\text{B}(\text{C}_6\text{F}_5)_4]^-$ : Generation of $(\text{C}_6\text{Me}_5)_3\text{Si}^+[\text{B}(\text{C}_6\text{F}_5)_4]^-$ (Table 1, Entry 7)                                                                 | S15        |
| 5.8      | Reaction of $\text{Me}_2(\text{C}_6\text{Me}_5)\text{SiH}$ with $\text{Ph}_3\text{C}^+[\text{CHB}_{11}\text{H}_5\text{Br}_6]^-$ : Generation of $\text{Me}_3\text{Si}^+[\text{CHB}_{11}\text{H}_5\text{Br}_6]^-$ (Table 1, Entry 8)                                                                       | S16        |
| 5.9      | Reaction of $\text{Et}_2\text{PhSiH}$ with $\text{Ph}_3\text{C}^+[\text{CHB}_{11}\text{H}_5\text{Br}_6]^-$ : Generation of $\text{Et}_3\text{Si}^+[\text{CHB}_{11}\text{H}_5\text{Br}_6]^-$ (Table 3, Entry 2)                                                                                            | S16        |
| 5.10     | Independent Synthesis of $\text{Et}_3\text{Si}^+[\text{CHB}_{11}\text{H}_5\text{Br}_6]^-$ from the Reaction of $\text{Et}_3\text{SiH}$ with $\text{Ph}_3\text{C}^+[\text{CHB}_{11}\text{H}_5\text{Br}_6]^-$                                                                                               | S17        |
| 5.11     | Reaction of $i\text{Pr}_2\text{PhSiH}$ with $\text{Ph}_3\text{C}^+[\text{CHB}_{11}\text{H}_5\text{Br}_6]^-$ : Generation of $i\text{Pr}_2\text{PhSi}^+[\text{CHB}_{11}\text{H}_5\text{Br}_6]^-$ (Table 3, Entry 3)                                                                                        | S18        |
| 5.12     | Reaction of $t\text{Bu}_2\text{PhSiH}$ with $\text{Ph}_3\text{C}^+[\text{CHB}_{11}\text{H}_5\text{Br}_6]^-$ (Table 3, Entry 4)                                                                                                                                                                            | S18        |
| 5.13     | Reaction of $\text{Me}_2\text{BnSiH}$ with $\text{Ph}_3\text{C}^+[\text{CHB}_{11}\text{H}_5\text{Br}_6]^-$ : Generation of $\text{Me}_3\text{Si}^+[\text{CHB}_{11}\text{H}_5\text{Br}_6]^-$ (Table 2, Entry 2)                                                                                            | S19        |
| 5.14     | Reaction of $\text{Me}_2t\text{BuSiH}$ with $\text{Ph}_3\text{C}^+[\text{CHB}_{11}\text{H}_5\text{Br}_6]^-$ : Generation of $\text{Me}_2t\text{BuSi}^+[\text{CHB}_{11}\text{H}_5\text{Br}_6]^-$ (Table 2, Entry 3)                                                                                        | S19        |
| <b>6</b> | <b>Mechanistic Control Experiments</b>                                                                                                                                                                                                                                                                    | <b>S20</b> |
| 6.1      | Influence of the Carborane Counteranion on the Selectivity of the Trimethylsilylium Ion Formation (Scheme 2)                                                                                                                                                                                              | S20        |
| 6.2      | Influence of the Borate Counteranion on the Selectivity of the Trimethylsilylium Ion Formation (Scheme 2)                                                                                                                                                                                                 | S20        |
| 6.3      | Addition of $\text{Me}_2\text{PhSiH}$ to a Mixture of $\text{MePh}_2\text{Si}^+[\text{CHB}_{11}\text{H}_5\text{Br}_6]^-$ and $\text{Me}_2\text{PhSi}^+[\text{CHB}_{11}\text{H}_5\text{Br}_6]^-$ : Generation of $\text{Me}_3\text{Si}^+[\text{CHB}_{11}\text{H}_5\text{Br}_6]^-$ (Scheme 3)               | S21        |
| <b>7</b> | <b>NMR Spectra</b>                                                                                                                                                                                                                                                                                        | <b>S22</b> |
| <b>8</b> | <b>Crystallographic Data</b>                                                                                                                                                                                                                                                                              | <b>S81</b> |
| <b>9</b> | <b>Computational Data</b>                                                                                                                                                                                                                                                                                 | <b>S85</b> |
| 9.1      | Evaluation of Silylium Ion Stability                                                                                                                                                                                                                                                                      | S85        |
| 9.2      | Silylium Ion Binding to Various Nucleophiles                                                                                                                                                                                                                                                              | S86        |
| 9.3      | Evaluation of Methyl Transfer Mechanism                                                                                                                                                                                                                                                                   | S88        |

---

|           |                                                                           |             |
|-----------|---------------------------------------------------------------------------|-------------|
| 9.4       | Geometries of the Bridged Structures                                      | S89         |
| 9.5       | Energy Data                                                               | S90         |
| 9.6       | Coordinates of the Calculated Structures                                  | S93         |
| 9.7       | Vibrational Frequencies ( $\text{cm}^{-1}$ ) of the Calculated Structures | S148        |
| <b>10</b> | <b>References</b>                                                         | <b>S178</b> |

## 1 General Information

All reactions were performed in flame-dried glassware using an *MBraun* glovebox or conventional Schlenk techniques under a static pressure of argon (glovebox) or nitrogen unless otherwise stated. Solvents for chromatography and extraction were distilled prior to use. Et<sub>2</sub>O and THF were dried over potassium/benzophenone and freshly distilled prior to use. Toluene was dried over sodium/benzophenone, distilled, degassed by three freeze-pump-thaw cycles, and stored in a glovebox over thermally activated 4 Å molecular sieves. Acetonitrile (99.9+%, extra dry, AcroSeal<sup>®</sup>) was purchased from *Acros Organics* and used as received. *n*-Pentane and *n*-hexane were obtained from an *MBraun* solvent system, degassed by three freeze-pump-thaw cycles and stored in a glovebox over thermally activated 4 Å molecular sieves. Hydrosilanes Me<sub>2</sub>PhSiH, MePh<sub>2</sub>SiH, and Me<sub>2</sub>*t*BuSiH were dried over CaH<sub>2</sub>, distilled, degassed by three freeze-pump-thaw cycles and stored in a glovebox over thermally activated 4 Å molecular sieves. Hydrosilanes Me(C<sub>6</sub>Me<sub>5</sub>)<sub>2</sub>SiH<sup>[S1]</sup> and Et<sub>2</sub>PhSiH<sup>[S2]</sup> were synthesized according to reported procedures. The concentration of *n*-butyllithium solutions was determined by titration using Suffert's reagent.<sup>[S3]</sup> *N,N,N,N*-Tetramethylethane-1,2-diamine (TMEDA) was dried over sodium, distilled, and stored under nitrogen. Cs<sup>+</sup>[CHB<sub>11</sub>H<sub>11</sub>]<sup>-</sup> was purchased from *KatChem*, used as received, and converted into Cs<sup>+</sup>[CHB<sub>11</sub>H<sub>5</sub>Br<sub>6</sub>]<sup>-</sup> according to a reported procedure.<sup>[S4]</sup> Trityl bromide (Ph<sub>3</sub>CBr) was purchased from *TCI*, stored in a glovebox, and used as received. Ph<sub>3</sub>C<sup>+</sup>[B(C<sub>6</sub>F<sub>5</sub>)<sub>4</sub>]<sup>-</sup> was synthesized according to a reported procedure.<sup>[S5]</sup> Analytical thin-layer chromatography (TLC) was performed on silica gel 60 F254 glass plates. Flash column chromatography was performed on silica gel 60 (40–63 μm, 230–400 mesh, ASTM) by *Grace* using the indicated solvents. <sup>1</sup>H, <sup>11</sup>B, <sup>13</sup>C, <sup>19</sup>F, and <sup>29</sup>Si NMR spectra were recorded in CD<sub>2</sub>Cl<sub>2</sub>, C<sub>6</sub>D<sub>6</sub>, or *o*-Cl<sub>2</sub>C<sub>6</sub>D<sub>4</sub> on a *Bruker* AV500 or AV700 instrument using valve NMR tubes by *Norell*. *o*-Cl<sub>2</sub>C<sub>6</sub>D<sub>4</sub> was degassed by three freeze-pump-thaw cycles and stored in a glovebox over thermally activated 4 Å molecular sieves. Chemical shifts are reported in parts per million (ppm) and are referenced to the residual solvent resonance as the internal standard (CDHCl<sub>2</sub>: δ 5.32 ppm for <sup>1</sup>H NMR and CD<sub>2</sub>Cl<sub>2</sub>: δ 53.84 ppm for <sup>13</sup>C NMR; C<sub>6</sub>D<sub>5</sub>H: δ 7.16 ppm for <sup>1</sup>H NMR and C<sub>6</sub>D<sub>6</sub>: δ 128.06 ppm for <sup>13</sup>C NMR; *o*-Cl<sub>2</sub>C<sub>6</sub>D<sub>3</sub>H: δ 6.94 and 7.20 ppm for <sup>1</sup>H NMR and *o*-Cl<sub>2</sub>C<sub>6</sub>D<sub>4</sub>: δ 127.1, 130.1, and 132.5 ppm for <sup>13</sup>C NMR). <sup>11</sup>B, <sup>19</sup>F, and <sup>29</sup>Si NMR spectra are referenced in compliance with the unified scale for NMR chemical shifts as recommended by the IUPAC stating the chemical shift relative to BF<sub>3</sub>·Et<sub>2</sub>O, CCl<sub>3</sub>F, and TMS, respectively.<sup>[S6]</sup> Data are reported as follows: chemical shift, multiplicity (s = singlet, d = doublet, t = triplet, q = quartet, sept = septet, m = multiplet, m<sub>c</sub> = centrosymmetric multiplet, br = broad signal), coupling constants (Hz), and integration. Mass spectrometry (MS) data were measured with the GC-MS system 5975C from *Agilent Technologies* by electron ionization (EI). The GC-MS

was equipped with a HP-5MS capillary column (30 m × 0.32 mm, 0.25 μm film thickness) by *Agilent Technologies*. Analyses were performed using the following program: He carrier gas, injection temperature: 300 °C, detector temperature: 300 °C, flow rate: 0.8 mL·min<sup>-1</sup>; temperature program: start temperature: 40 °C, heating rate 10 °C·min<sup>-1</sup>, end temperature 280 °C for 10 min. Infrared (IR) spectra were recorded on a *Jasco FT/IR-4100* spectrometer equipped with an ATR unit, and the signals are reported in wavenumbers (cm<sup>-1</sup>). Melting points (m.p.) were determined with a *Stuart Scientific* SMP20 instrument and are not corrected. High resolution mass spectra (HRMS) were obtained from the *Analytical Facility* at the *Institut für Chemie, Technische Universität Berlin*.

## 2 Experimental Details for the Synthesis of Various Hydrosilanes

### 2.1 Dimethyl(2,3,4,5,6-pentamethylphenyl)silane

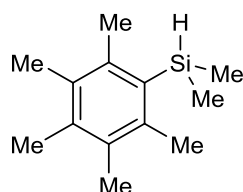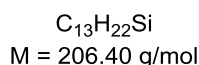

To a solution of pentamethylphenyl bromide (1.14 g, 5.02 mmol, 1.00 equiv) and TMEDA (1.14 mL, 878 mg, 7.55 mmol, 1.51 equiv) in THF (100 mL), *n*-BuLi (2.68 M in hexanes, 2.80 mL, 7.50 mmol, 1.50 equiv) was added dropwise at -78 °C. After stirring for 1 h, chloro(dimethyl)silane (1.67 mL, 1.42 g, 15.0 mmol, 3.00 equiv) was added, and the mixture was allowed to warm to room temperature overnight. After heating for 1 h at 50 °C, H<sub>2</sub>O (~30 mL) was added. The phases were separated, and the aqueous phase was extracted with *tert*-butyl methyl ether (~3 × 30 mL). The combined organic phases were dried over MgSO<sub>4</sub>, and the solvents were removed under reduced pressure. Purification by flash column chromatography on silica gel using cyclohexane as eluent afforded the desired product (528 mg, 51%) as a white solid.

$R_f = 0.67$  (cyclohexane). **m.p.** = 51 °C. **IR** (ATR):  $\tilde{\nu} = 3003, 2905, 2176$  (Si-H), 1738, 1557, 1448, 1389, 1276, 1257, 1242, 1223, 1089, 1061, 1007, 948, 895, 831, 816, 763, 728, 694, 648 cm<sup>-1</sup>. **<sup>1</sup>H NMR** (500 MHz, C<sub>6</sub>D<sub>6</sub>, 300 K):  $\delta$  0.43 (d, <sup>3</sup>*J*(H,H) = 4.1 Hz, 6H, SiCH<sub>3</sub>), 2.04 (s, 6H, *m*-CH<sub>3</sub>), 2.08 (s, 3H, *p*-CH<sub>3</sub>), 2.36 (s, 6H, *o*-CH<sub>3</sub>), 5.07 (sept, <sup>3</sup>*J*(H,H) = 4.0 Hz, 1H, SiH) ppm. **<sup>13</sup>C{<sup>1</sup>H} NMR** (126 MHz, C<sub>6</sub>D<sub>6</sub>, 300 K):  $\delta$  -1.3 (SiCH<sub>3</sub>), 16.5 (*m*-CH<sub>3</sub>), 16.9 (*p*-CH<sub>3</sub>), 21.8 (*o*-CH<sub>3</sub>), 132.3 (*m*-C<sub>Ar</sub>), 132.7 (*i*-C<sub>Ar</sub>), 136.2 (*p*-C<sub>Ar</sub>), 139.5 (*o*-C<sub>Ar</sub>) ppm. **<sup>29</sup>Si DEPT NMR** (99

MHz, C<sub>6</sub>D<sub>6</sub>, 300 K, optimized for  $J = 200$  Hz):  $\delta -25.8$  ppm. **HRMS** (EI): calculated for C<sub>13</sub>H<sub>22</sub>Si<sup>+</sup> [M]<sup>+</sup>: 206.1485; found 206.1480.

## 2.2 Benzyl(dimethyl)silane

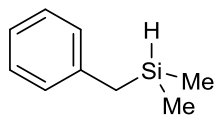

C<sub>9</sub>H<sub>14</sub>Si  
M = 150.30 g/mol

To a suspension of magnesium turnings (401 mg, 16.5 mmol, 1.83 equiv) in THF (5 mL), a few drops of 1,2-dibromoethane and chloro(dimethyl)silane (1.00 mL, 852 mg, 9.00 mmol, 1.00 equiv) were added. While stirring at room temperature, a solution of benzyl bromide (1.39 mL, 2.00 g, 11.7 mmol, 1.30 equiv) in THF (35 mL) was added dropwise over a period of 4 h. The reaction was quenched with saturated aqueous NH<sub>4</sub>Cl solution (~20 mL). The phases were separated, and the aqueous phase was extracted with *tert*-butyl methyl ether (~3 × 30 mL). The combined organic phases were dried over MgSO<sub>4</sub>, and the solvents were removed under reduced pressure. Purification by Kugelrohr distillation (25 °C, 10<sup>-3</sup> mbar) afforded the desired product (680 mg, 50%) as a colorless oil.

$R_f = 0.63$  (cyclohexane). **IR** (ATR):  $\tilde{\nu} = 3081, 3061, 3024, 2958, 2895, 2113$  (Si-H), 1600, 1493, 1452, 1409, 1249, 1206, 1155, 1056, 1031, 879, 836, 817, 781, 770, 839, 696, 619 cm<sup>-1</sup>. **<sup>1</sup>H NMR** (500 MHz, C<sub>6</sub>D<sub>6</sub>, 300 K):  $\delta -0.06$  (d,  $^3J(\text{H,H}) = 3.6$  Hz, 6H, SiCH<sub>3</sub>), 1.97 (d,  $^3J(\text{H,H}) = 3.2$  Hz, 2H, SiCH<sub>2</sub>Ph), 4.12 (m<sub>c</sub>, 1H, SiH), 6.95–6.96 (m, 2H, *o*-H<sub>Ar</sub>), 7.01 (t,  $^3J(\text{H,H}) = 7.4$  Hz, 1H, *p*-H<sub>Ar</sub>), 7.13–7.16 (m, 2H, *m*-H<sub>Ar</sub>) ppm. **<sup>13</sup>C{<sup>1</sup>H} NMR** (126 MHz, C<sub>6</sub>D<sub>6</sub>, 300 K):  $\delta -4.7$  (SiCH<sub>3</sub>), 24.3 (SiCH<sub>2</sub>Ph), 124.7 (*p*-C<sub>Ar</sub>), 128.5 (*o*-C<sub>Ar</sub>), 128.7 (*m*-C<sub>Ar</sub>), 140.1 (*i*-C<sub>Ar</sub>) ppm. **<sup>29</sup>Si DEPT NMR** (99 MHz, C<sub>6</sub>D<sub>6</sub>, 300 K, optimized for  $J = 200$  Hz):  $\delta -12.3$  ppm. **HRMS** (EI): calculated for C<sub>9</sub>H<sub>14</sub>Si<sup>+</sup> [M]<sup>+</sup>: 150.0859; found 150.0852.

### 2.3 Diisopropyl(phenyl)silane

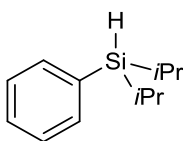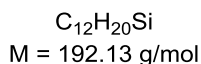

To a solution of diisopropyl(chloro)silane (1.38 mL, 1.20 g, 7.98 mmol, 1.00 equiv) in Et<sub>2</sub>O (32 mL), phenyllithium (~1.9 M in *n*-Bu<sub>2</sub>O, 6.3 mL, ~12 mmol, ~1.5 equiv) was added dropwise at 0 °C. After stirring for 1 h, H<sub>2</sub>O (~20 mL) was added. The phases were separated, and the aqueous phase was extracted with *tert*-butyl methyl ether (~3 × 30 mL). The combined organic phases were dried over MgSO<sub>4</sub>, and the solvents were removed under reduced pressure. Purification by flash column chromatography on silica gel using cyclohexane as eluent afforded the desired product (1.08 g, 70%) as a colorless oil.

$R_f = 0.75$  (cyclohexane). **IR** (ATR):  $\tilde{\nu} = 3069, 2940, 2890, 2863, 2099$  (Si–H), 1461, 1428, 1383, 1365, 1238, 1111, 1065, 998, 918, 879, 800, 781, 732, 699, 657, 607 cm<sup>-1</sup>. **<sup>1</sup>H NMR** (500 MHz, C<sub>6</sub>D<sub>6</sub>, 298 K):  $\delta$  1.00 (d, <sup>3</sup>*J*(H,H) = 7.1 Hz, 6H, SiCHCH<sub>3</sub>), 1.07 (d, <sup>3</sup>*J*(H,H) = 7.0 Hz, 6H, SiCHCH<sub>3</sub>), 1.09–1.19 (m, 2H, SiCHCH<sub>3</sub>), 4.21 (t, <sup>3</sup>*J*(H,H) = 3.0 Hz, 1H, SiH), 7.18–7.21 (m, 3H, *m*-H<sub>Ar</sub>, *p*-H<sub>Ar</sub>), 7.48–7.52 (m, 2H, *o*-H<sub>Ar</sub>) ppm. **<sup>13</sup>C{<sup>1</sup>H} NMR** (126 MHz, C<sub>6</sub>D<sub>6</sub>, 298 K):  $\delta$  11.0 (SiCHCH<sub>3</sub>), 18.7 (SiCHCH<sub>3</sub>), 18.9 (SiCHCH<sub>3</sub>), 128.1 (*p*-C<sub>Ar</sub>), 129.5 (*m*-C<sub>Ar</sub>), 134.2 (*i*-C<sub>Ar</sub>), 135.8 (*o*-C<sub>Ar</sub>) ppm. **<sup>29</sup>Si DEPT NMR** (99 MHz, C<sub>6</sub>D<sub>6</sub>, 298 K, optimized for *J* = 200 Hz):  $\delta$  5.9 ppm. **HRMS** (EI): calculated for C<sub>12</sub>H<sub>20</sub>Si<sup>+</sup> [M]<sup>+</sup>: 192.1329; found 192.1320.

### 2.4 Di-*tert*-butyl(phenyl)silane

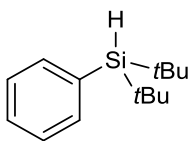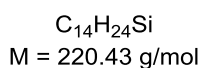

To a solution of di-*tert*-butyl(chloro)silane (1.62 mL, 1.43 g, 8.01 mmol, 1.00 equiv) in THF (32 mL), phenyllithium (~1.9 M in *n*-Bu<sub>2</sub>O, 6.3 mL, ~12 mmol, ~1.5 equiv) was added dropwise at 0 °C. After stirring for 1 h, H<sub>2</sub>O (~20 mL) was added. The phases were separated, and the aqueous phase was extracted with *tert*-butyl methyl ether (~3×30 mL). The combined organic phases were dried over MgSO<sub>4</sub>, and the solvents were removed

under reduced pressure. Purification by flash column chromatography on silica gel using cyclohexane as eluent afforded the desired product (1.32 g, 75%) as a colorless oil.

$R_f = 0.80$  (cyclohexane). **IR** (ATR):  $\tilde{\nu} = 3069, 2959, 2938, 2890, 2856, 2097$  (Si–H), 1738, 1468, 1427, 1388, 1363, 1217, 1107, 1066, 1012, 935, 800, 734, 700, 619  $\text{cm}^{-1}$ .  **$^1\text{H}$  NMR** (500 MHz,  $\text{C}_6\text{D}_6$ , 300 K):  $\delta$  1.07 (s, 18H,  $\text{SiCCH}_3$ ), 4.07 (s, 1H, SiH), 7.17–7.20 (m, 3H,  $m\text{-H}_{\text{Ar}}$ ,  $p\text{-H}_{\text{Ar}}$ ), 7.59–7.61 (m, 2H,  $o\text{-H}_{\text{Ar}}$ ) ppm.  **$^{13}\text{C}\{^1\text{H}\}$  NMR** (126 MHz,  $\text{C}_6\text{D}_6$ , 300 K):  $\delta$  19.1 ( $\text{SiCCH}_3$ ), 29.1 ( $\text{SiCCH}_3$ ), 128.0 ( $p\text{-C}_{\text{Ar}}$ ), 129.4 ( $m\text{-C}_{\text{Ar}}$ ), 135.6 ( $i\text{-C}_{\text{Ar}}$ ), 136.1 ( $o\text{-C}_{\text{Ar}}$ ) ppm.  **$^{29}\text{Si}$  DEPT NMR** (99 MHz,  $\text{C}_6\text{D}_6$ , 298 K, optimized for  $J = 200$  Hz):  $\delta$  13.1 ppm. **HRMS** (EI): calculated for  $\text{C}_{14}\text{H}_{24}\text{Si}^+ [\text{M}]^+$ : 220.1642; found 220.1648.

### 3 Experimental Details for the Synthesis of $\text{Ph}_3\text{C}^+[\text{CHB}_{11}\text{H}_5\text{Br}_6]^-$

#### 3.1 $\text{Ag}^+[\text{CHB}_{11}\text{H}_5\text{Br}_6]^-$

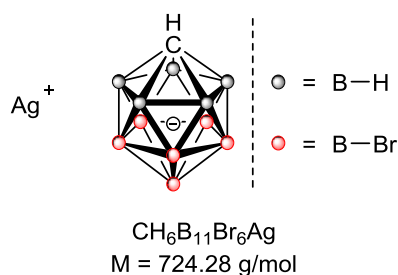

According to a modified reported procedure,<sup>[S7]</sup>  $\text{Cs}^+[\text{CHB}_{11}\text{H}_5\text{Br}_6]^-$  (2.50 g, 3.34 mmol, 1.00 equiv) was dissolved in boiling distilled water (100 mL). One drop of concentrated nitric acid was added to ensure a slightly acidic solution. Under exclusion of light, a solution of  $\text{AgNO}_3$  (680 mg, 4.00 mmol, 1.20 equiv) in distilled water (2 mL) was added, resulting in formation of a white precipitate. After boiling for additional 15 min, the suspension was allowed to cool to room temperature. The solid was collected by filtration on a fine porosity glass frit, washed with distilled water (~10 mL) and dried for 3 days at 90 °C ( $10^{-3}$  mbar) to give the desired product (2.21 g, 91%) as a white powder, which was directly used in the next reaction step.



**3.2 Ph<sub>3</sub>C<sup>+</sup>[CHB<sub>11</sub>H<sub>5</sub>Br<sub>6</sub>]<sup>-</sup>**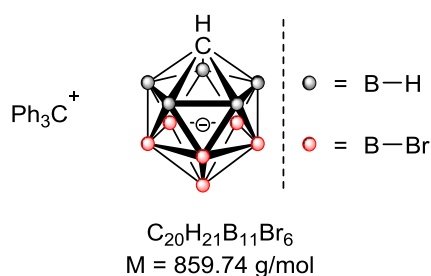

According to a modified reported procedure,<sup>[S8]</sup> Ag<sup>+</sup>[CHB<sub>11</sub>H<sub>5</sub>Br<sub>6</sub>]<sup>-</sup> (2.18 g, 3.01 mmol, 1.00 equiv) and Ph<sub>3</sub>CBr (972 mg, 3.01 mmol, 1.00 equiv) were weighed into a Schlenk flask in a glovebox. Outside the glovebox, toluene (30 mL) and acetonitrile (50 mL) were added. After stirring for 2 h at room temperature under exclusion of light, the formed AgBr salt was removed by filtration under nitrogen and washed with small portions of toluene/acetonitrile (~10 mL; v:v = 4:1). The filtrate was concentrated under reduced pressure to a few mL, resulting in precipitation of an orange solid. In a glovebox, the solid was collected by filtration and washed with toluene (~2 mL) and *n*-pentane (~5 mL). After drying overnight at 80 °C (10<sup>-3</sup> mbar), the desired product (2.44 g, 94%) was obtained as a yellow-orange solid.

**<sup>1</sup>H NMR** (500 MHz, CD<sub>2</sub>Cl<sub>2</sub>, 300 K): δ ~1.6–3.1 (br m, 6H, [CHB<sub>11</sub>H<sub>5</sub>Br<sub>6</sub>]<sup>-</sup>), 7.69–7.72 (m, 6H, *o*-H<sub>Ar</sub>), 7.91–7.95 (m, 6H, *m*-H<sub>Ar</sub>), 8.30 (tt, 3H, <sup>3</sup>J(H,H) = 7.5 Hz, <sup>4</sup>J(H,H) = 1.2 Hz, *p*-H<sub>Ar</sub>) ppm.

**<sup>11</sup>B NMR** (161 MHz, CD<sub>2</sub>Cl<sub>2</sub>, 300 K): δ -20.2 (d, <sup>1</sup>J(B,H) = 167 Hz), -9.9 (s), -1.8 (s) ppm.

**<sup>13</sup>C NMR** (126 MHz, CD<sub>2</sub>Cl<sub>2</sub>, 300 K): δ 41.6 ([CHB<sub>11</sub>H<sub>5</sub>Br<sub>6</sub>]<sup>-</sup>), 131.2 (*m*-C<sub>Ar</sub>), 140.4 (*i*-C<sub>Ar</sub>), 143.3 (*o*-C<sub>Ar</sub>), 144.0 (*p*-C<sub>Ar</sub>), 211.1 (CPh<sub>3</sub>) ppm.

## 4 General Procedures for the Generation of Silylium Ions

### 4.1 General Procedure for the Generation of Silylium Ions using $\text{Ph}_3\text{C}^+[\text{B}(\text{C}_6\text{F}_5)_4]^-$ (GP 1)

In a glovebox, a solution of the corresponding hydrosilane (0.10–0.20 mmol, 4.0 equiv) in  $\text{C}_6\text{D}_6$  (~10 drops) is added to a solution of  $\text{Ph}_3\text{C}^+[\text{B}(\text{C}_6\text{F}_5)_4]^-$  (23–46 mg, 0.025–0.050 mmol, 1.0 equiv) in  $\text{C}_6\text{D}_6$  (~10 drops), resulting in the formation of a biphasic mixture. After stirring for 60 min at room temperature, the upper phase is removed, and the oily bottom phase is washed with  $\text{C}_6\text{D}_6$  (~3 × 10 drops). The residue is dissolved in  $o\text{-Cl}_2\text{C}_6\text{D}_4$  (0.60 mL), transferred into a valve NMR tube, and directly subjected to NMR spectroscopic analysis.

### 4.2 General Procedure for the Generation of Silylium Ions using $\text{Ph}_3\text{C}^+[\text{CHB}_{11}\text{H}_5\text{Br}_6]^-$ (GP 2)

In a glovebox, a solution of the corresponding hydrosilane (0.046–0.23 mmol, 2.0 or 4.0 equiv) in toluene (~5–10 drops) is added to a suspension of  $\text{Ph}_3\text{C}^+[\text{CHB}_{11}\text{H}_5\text{Br}_6]^-$  (20–50 mg, 0.023–0.058 mmol, 1.0 equiv) in toluene (~5–10 drops). After stirring the reaction mixture at the indicated temperature for a certain time, *n*-pentane (~1 mL) is added to ensure full precipitation of all ionic components. The solid is collected by filtration, washed with *n*-pentane (~3 × 0.5 mL) and then briefly dried under vacuum. Pale yellow solids are obtained in case of silylium ions with aromatic substituents, whereas those with purely aliphatic groups appear as white solids.  $o\text{-Cl}_2\text{C}_6\text{D}_4$  (0.60 mL) is used to transfer the products into a valve NMR tube, which is directly subjected to NMR spectroscopic analysis.

## 5 Experimental Details for the Hydride Abstraction of Various Hydrosilanes using $\text{Ph}_3\text{C}^+[\text{B}(\text{C}_6\text{F}_5)_4]^-$ and $\text{Ph}_3\text{C}^+[\text{CHB}_{11}\text{H}_5\text{Br}_6]^-$

### 5.1 Reaction of $\text{Me}(\text{C}_6\text{Me}_5)_2\text{SiH}$ with $\text{Ph}_3\text{C}^+[\text{B}(\text{C}_6\text{F}_5)_4]^-$ : Generation of $(\text{C}_6\text{Me}_5)_3\text{Si}^+[\text{B}(\text{C}_6\text{F}_5)_4]^-$ (Table 1, Entry 1)

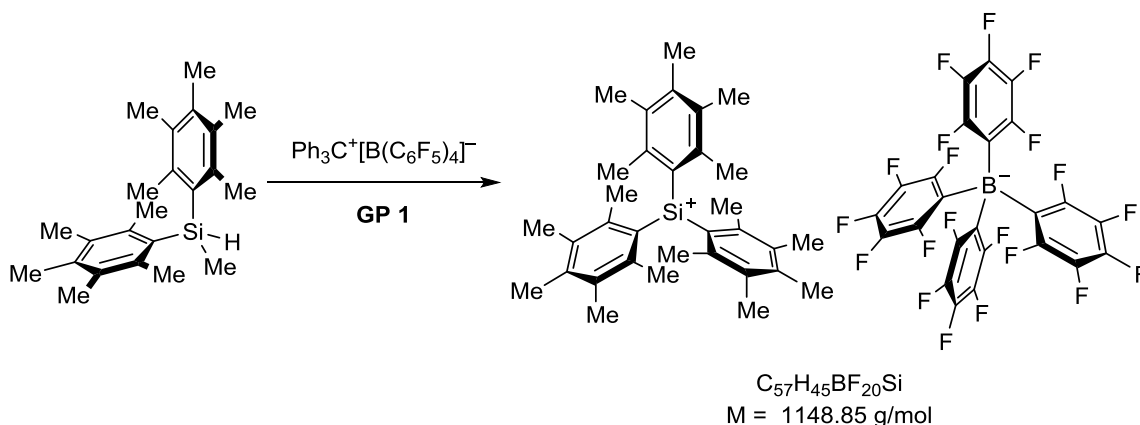

According to **GP 1**,  $\text{Ph}_3\text{C}^+[\text{B}(\text{C}_6\text{F}_5)_4]^-$  (23 mg, 0.025 mmol, 1.0 equiv) was treated with  $\text{Me}(\text{C}_6\text{Me}_5)_2\text{SiH}$  (34 mg, 0.10 mmol, 4.0 equiv). NMR spectroscopic analysis revealed clean formation of  $(\text{C}_6\text{Me}_5)_3\text{Si}^+[\text{B}(\text{C}_6\text{F}_5)_4]^-$ .

$^1\text{H}$  NMR (500 MHz,  $\sigma\text{-Cl}_2\text{C}_6\text{D}_4$ , 298 K):  $\delta$  1.99 (s, 18H, *m*- $\text{CH}_3$ ), 2.07 (s, 9H, *p*- $\text{CH}_3$ ), 2.37 (s, 18H, *o*- $\text{CH}_3$ ) ppm.  $^{11}\text{B}\{^1\text{H}\}$  NMR (161 MHz,  $\sigma\text{-Cl}_2\text{C}_6\text{D}_4$ , 298 K):  $\delta$  -16.1 (s) ppm.  $^{13}\text{C}\{^1\text{H}\}$  NMR (126 MHz,  $\sigma\text{-Cl}_2\text{C}_6\text{D}_4$ , 298 K):  $\delta$  15.7 (*m*- $\text{CH}_3$ ), 17.4 (*p*- $\text{CH}_3$ ), 24.3 (*o*- $\text{CH}_3$ ), 134.2 (*i*- $\text{C}_{\text{Ar}}$ ), 135.9 (*m*- $\text{C}_{\text{Ar}}$ ), 138.3 (*o*- $\text{C}_{\text{Ar}}$ ), 146.1 (*p*- $\text{C}_{\text{Ar}}$ ) ppm. The signals of the  $[\text{B}(\text{C}_6\text{F}_5)_4]^-$  counteranion were not detected.  $^{19}\text{F}$  NMR (471 MHz,  $\sigma\text{-Cl}_2\text{C}_6\text{D}_4$ , 298 K):  $\delta$  -166.2 (t,  $^3J(\text{F},\text{F}) = 17$  Hz), -162.4 (t,  $^3J(\text{F},\text{F}) = 20$  Hz), -131.8 (s) ppm.  $^1\text{H}/^{29}\text{Si}$  HMQC NMR (500/99 MHz,  $\sigma\text{-Cl}_2\text{C}_6\text{D}_4$ , 298 K, optimized for  $J = 3$  Hz):  $\delta$  1.99/217.0, 2.37/217.0 ppm.

## 5.2 Reaction of $\text{Me}(\text{C}_6\text{Me}_5)_2\text{SiH}$ with $\text{Ph}_3\text{C}^+[\text{CHB}_{11}\text{H}_5\text{Br}_6]^-$ : Generation of $(\text{C}_6\text{Me}_5)_3\text{Si}^+[\text{CHB}_{11}\text{H}_5\text{Br}_6]^-$ (Table 1, Entry 2)

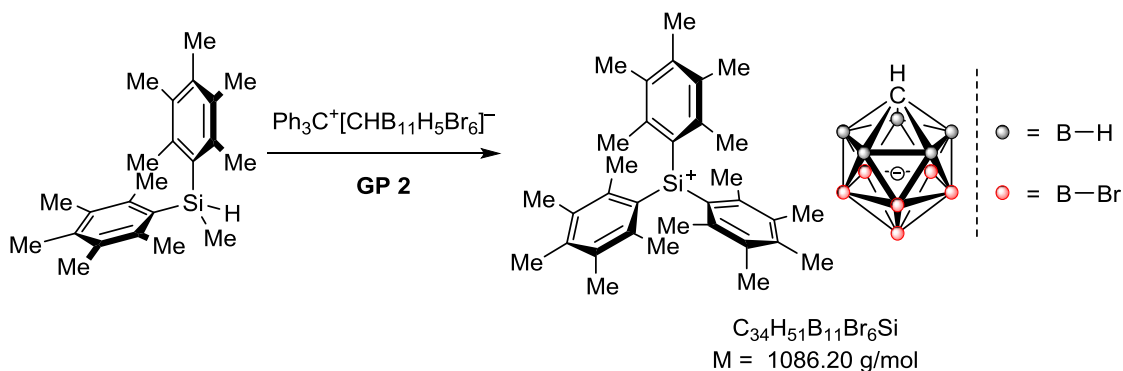

According to **GP 2**,  $\text{Ph}_3\text{C}^+[\text{CHB}_{11}\text{H}_5\text{Br}_6]^-$  (20 mg, 0.023 mmol, 1.0 equiv) was treated with  $\text{Me}(\text{C}_6\text{Me}_5)_2\text{SiH}$  (32 mg, 0.095 mmol, 4.1 equiv). The reaction was stopped after stirring for 22 h at room temperature. NMR spectroscopic analysis revealed clean formation of  $(\text{C}_6\text{Me}_5)_3\text{Si}^+[\text{CHB}_{11}\text{H}_5\text{Br}_6]^-$ .

$^1\text{H}$  NMR (700 MHz,  $o\text{-Cl}_2\text{C}_6\text{D}_4$ , 298 K):  $\delta$  1.96 (s, 18H,  $m\text{-CH}_3$ ), 2.02 (s, 9H,  $p\text{-CH}_3$ ),  $\sim$ 2.1–3.2 (br m, 24H,  $o\text{-CH}_3$ ,  $[\text{CHB}_{11}\text{H}_5\text{Br}_6]^-$ ) ppm.  $^{11}\text{B}$  NMR (224 MHz,  $o\text{-Cl}_2\text{C}_6\text{D}_4$ , 298 K):  $\delta$   $-19.7$  (d,  $^1J(\text{B},\text{H}) = 145$  Hz),  $-9.1$  (s),  $-0.8$  (s) ppm.  $^{13}\text{C}\{^1\text{H}\}$  NMR (175 MHz,  $o\text{-Cl}_2\text{C}_6\text{D}_4$ , 298 K):  $\delta$  16.0 ( $m\text{-CH}_3$ ), 17.6 ( $p\text{-CH}_3$ ), 24.8 ( $o\text{-CH}_3$ ), 41.4 ( $[\text{CHB}_{11}\text{H}_5\text{Br}_6]^-$ ), 134.2 ( $i\text{-C}_{\text{Ar}}$ ), 135.9 ( $m\text{-C}_{\text{Ar}}$ ), 138.4 ( $o\text{-C}_{\text{Ar}}$ ), 146.0 ( $p\text{-C}_{\text{Ar}}$ ) ppm.  $^1\text{H}/^{29}\text{Si}$  HMQC NMR (700/139 MHz,  $o\text{-Cl}_2\text{C}_6\text{D}_4$ , 298 K, optimized for  $J = 3$  Hz):  $\delta$  1.96/216.8, 2.37/216.8 ppm.

## 5.3 Reaction of $\text{MePh}_2\text{SiH}$ with $\text{Ph}_3\text{C}^+[\text{B}(\text{C}_6\text{F}_5)_4]^-$ (Table 1, Entry 3)

According to **GP 1**,  $\text{Ph}_3\text{C}^+[\text{B}(\text{C}_6\text{F}_5)_4]^-$  (23 mg, 0.025 mmol, 1.0 equiv) was treated with  $\text{MePh}_2\text{SiH}$  (20 mg, 0.10 mmol, 4.0 equiv).  $^{19}\text{F}$  NMR spectroscopic analysis revealed formation of  $\text{B}(\text{C}_6\text{F}_5)_3$  (cf. Figure S25), whereas multiple high-field signals in the  $^1\text{H}/^{29}\text{Si}$  HMQC NMR spectrum indicated the presence of various organosilicon compounds. GC-MS analysis eventually revealed the existence of several silanes arising from substituent exchange reactions and anion decomposition, such as  $\text{MePh}(\text{C}_6\text{F}_5)\text{SiH}$  (minor),  $\text{Me}_2\text{Ph}(\text{C}_6\text{F}_5)\text{Si}$  (major),  $\text{Ph}_2(\text{C}_6\text{F}_5)\text{SiH}$  (minor), and  $\text{MePh}_2(\text{C}_6\text{F}_5)\text{Si}$  (major).

#### 5.4 Reaction of MePh<sub>2</sub>SiH with Ph<sub>3</sub>C<sup>+</sup>[CHB<sub>11</sub>H<sub>5</sub>Br<sub>6</sub>]<sup>-</sup>: Generation of MePh<sub>2</sub>Si<sup>+</sup>[CHB<sub>11</sub>H<sub>5</sub>Br<sub>6</sub>]<sup>-</sup> with Small Amounts of Me<sub>2</sub>PhSi<sup>+</sup>[CHB<sub>11</sub>H<sub>5</sub>Br<sub>6</sub>]<sup>-</sup> (Table 1, Entry 4)

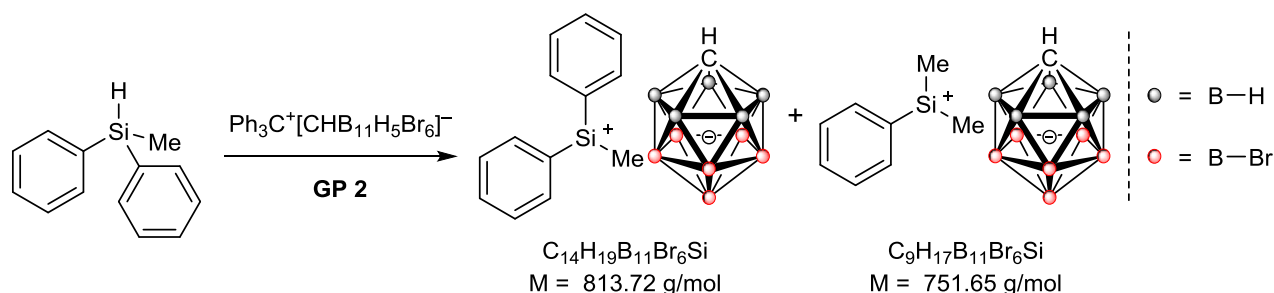

According to **GP 2**, Ph<sub>3</sub>C<sup>+</sup>[CHB<sub>11</sub>H<sub>5</sub>Br<sub>6</sub>]<sup>-</sup> (20 mg, 0.023 mmol, 1.0 equiv) was treated with MePh<sub>2</sub>SiH (19 mg, 0.096 mmol, 4.2 equiv). The reaction was stopped after stirring for 24 h at room temperature. The NMR spectra showed the formation of MePh<sub>2</sub>Si<sup>+</sup>[CHB<sub>11</sub>H<sub>5</sub>Br<sub>6</sub>]<sup>-</sup> along with small amounts of Me<sub>2</sub>PhSi<sup>+</sup>[CHB<sub>11</sub>H<sub>5</sub>Br<sub>6</sub>]<sup>-</sup> (ratio ~79:21). No significant change in the NMR spectra was observed independent of reaction time, temperature, or stoichiometry of the hydrosilane (e.g., 7 days at room temperature, 3 days at 50 °C, or 2.0 equiv of MePh<sub>2</sub>SiH).

Single crystals of MePh<sub>2</sub>Si<sup>+</sup>[CHB<sub>11</sub>H<sub>5</sub>Br<sub>6</sub>]<sup>-</sup> suitable for X-ray diffraction were obtained from a solution in *o*-Cl<sub>2</sub>C<sub>6</sub>D<sub>4</sub> by vapor diffusion with *n*-hexane at room temperature (cf. Figure S60). CCDC 1818582 contains the supplementary crystallographic data. These data are provided free of charge by The Cambridge Crystallographic Data Centre.

**<sup>1</sup>H NMR** (500 MHz, *o*-Cl<sub>2</sub>C<sub>6</sub>D<sub>4</sub>, 300 K): δ 1.51 (s, 3H, SiCH<sub>3</sub>), ~1.7–3.2 (br m, 6H, [CHB<sub>11</sub>H<sub>5</sub>Br<sub>6</sub>]<sup>-</sup>), 7.35 (dd, <sup>3</sup>J(H,H) = 7.7 Hz, <sup>3</sup>J(H,H) = 7.4 Hz, 4H, *m*-H<sub>Ar</sub>), 7.47 (t, <sup>3</sup>J(H,H) = 7.5 Hz, 2H, *p*-H<sub>Ar</sub>), 7.64 (d, <sup>3</sup>J(H,H) = 7.6 Hz, 4H, *o*-H<sub>Ar</sub>) ppm. **<sup>11</sup>B NMR** (161 MHz, *o*-Cl<sub>2</sub>C<sub>6</sub>D<sub>4</sub>, 300 K): δ -20.8 (br s), -9.2 (s), -1.4 (s) ppm. **<sup>13</sup>C{<sup>1</sup>H} NMR** (126 MHz, *o*-Cl<sub>2</sub>C<sub>6</sub>D<sub>4</sub>, 300 K): δ -0.6 (SiCH<sub>3</sub>), 41.3 ([CHB<sub>11</sub>H<sub>5</sub>Br<sub>6</sub>]<sup>-</sup>), 126.0 (*i*-C<sub>Ar</sub>), 129.5 (*m*-C<sub>Ar</sub>), 134.5 (*p*-C<sub>Ar</sub>), 135.6 (*o*-C<sub>Ar</sub>) ppm. **<sup>1</sup>H/<sup>29</sup>Si HMQC NMR** (500/99 MHz, *o*-Cl<sub>2</sub>C<sub>6</sub>D<sub>4</sub>, 300 K, optimized for *J* = 7 Hz): δ 1.51/57.4, 7.64/57.4 ppm.

Selected NMR spectroscopic data for Me<sub>2</sub>PhSi<sup>+</sup>[CHB<sub>11</sub>H<sub>5</sub>Br<sub>6</sub>]<sup>-</sup>:

**<sup>1</sup>H NMR** (500 MHz, *o*-Cl<sub>2</sub>C<sub>6</sub>D<sub>4</sub>, 300 K): δ 1.20 (s, 3H, SiCH<sub>3</sub>) ppm. **<sup>1</sup>H/<sup>29</sup>Si HMQC NMR** (500/99 MHz, *o*-Cl<sub>2</sub>C<sub>6</sub>D<sub>4</sub>, 300 K, optimized for *J* = 7 Hz): δ 1.20/76.0 ppm.

Trapping experiments with (C<sub>6</sub>F<sub>5</sub>)<sub>3</sub>PF<sub>2</sub>:

The reaction mixture was treated with (C<sub>6</sub>F<sub>5</sub>)<sub>3</sub>PF<sub>2</sub><sup>[S9]</sup> (~13 mg, ~0.023 mmol, ~1.0 equiv) in order to convert the silicon cations into the corresponding fluorosilanes, thereby facilitating

product characterization by both NMR spectroscopic and GC-MS analysis. Upon addition of  $(\text{C}_6\text{F}_5)_3\text{PF}_2$ , immediate decolorization of the reaction mixture was observed.  $\text{MePh}_2\text{SiF}$  and  $\text{Me}_2\text{PhSiF}$  were obtained as major compounds.

Selected NMR spectroscopic data for **MePh<sub>2</sub>SiF**:

**<sup>1</sup>H NMR** (500 MHz, *o*-Cl<sub>2</sub>C<sub>6</sub>D<sub>4</sub>, 300 K):  $\delta$  0.65 (d,  $^3J(\text{H},\text{F}) = 7.2$  Hz, 3H, SiCH<sub>3</sub>) ppm. **<sup>1</sup>H/<sup>29</sup>Si**

**HMQC NMR** (500/99 MHz, *o*-Cl<sub>2</sub>C<sub>6</sub>D<sub>4</sub>, 300 K, optimized for  $J = 7$  Hz):  $\delta$  0.65/8.2 ppm.

Selected NMR spectroscopic data for **Me<sub>2</sub>PhSiF**:

**<sup>1</sup>H NMR** (500 MHz, *o*-Cl<sub>2</sub>C<sub>6</sub>D<sub>4</sub>, 300 K):  $\delta$  0.40 (d,  $^3J(\text{H},\text{F}) = 7.2$  Hz, 6H, SiCH<sub>3</sub>) ppm. **<sup>1</sup>H/<sup>29</sup>Si**

**HMQC NMR** (500/99 MHz, *o*-Cl<sub>2</sub>C<sub>6</sub>D<sub>4</sub>, 300 K, optimized for  $J = 7$  Hz):  $\delta$  0.40/20.5 ppm.

### 5.5 Reaction of MePh<sub>2</sub>SiH with Ph<sub>3</sub>C<sup>+</sup>[B(C<sub>6</sub>F<sub>5</sub>)<sub>4</sub>]<sup>-</sup> (Table 1, Entry 5)

According to **GP 1**, Ph<sub>3</sub>C<sup>+</sup>[B(C<sub>6</sub>F<sub>5</sub>)<sub>4</sub>]<sup>-</sup> (23 mg, 0.025 mmol, 1.0 equiv) was treated with MePh<sub>2</sub>SiH (20 mg, 0.10 mmol, 4.0 equiv). <sup>19</sup>F NMR spectroscopic analysis revealed formation of B(C<sub>6</sub>F<sub>5</sub>)<sub>3</sub> (cf. Figure S25), whereas multiple high-field signals in the <sup>1</sup>H/<sup>29</sup>Si HMQC NMR spectrum indicated the presence of various organosilicon compounds. GC-MS analysis eventually revealed the existence of several silanes arising from substituent exchange reactions and anion decomposition, such as MePh(C<sub>6</sub>F<sub>5</sub>)SiH (minor), Me<sub>2</sub>Ph(C<sub>6</sub>F<sub>5</sub>)Si (major), Ph<sub>2</sub>(C<sub>6</sub>F<sub>5</sub>)SiH (minor), and MePh<sub>2</sub>(C<sub>6</sub>F<sub>5</sub>)Si (major).

### 5.6 Reaction of Me<sub>2</sub>PhSiH with Ph<sub>3</sub>C<sup>+</sup>[CHB<sub>11</sub>H<sub>5</sub>Br<sub>6</sub>]<sup>-</sup>: Generation of Me<sub>3</sub>Si<sup>+</sup>[CHB<sub>11</sub>H<sub>5</sub>Br<sub>6</sub>]<sup>-</sup> (Table 1, Entry 6)

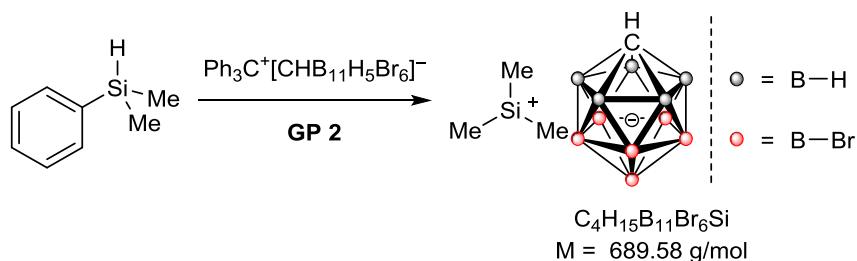

According to **GP 2**, Ph<sub>3</sub>C<sup>+</sup>[CHB<sub>11</sub>H<sub>5</sub>Br<sub>6</sub>]<sup>-</sup> (50 mg, 0.058 mmol, 1.0 equiv) was treated with Me<sub>2</sub>PhSiH (16 or 32 mg, 0.12 or 0.23 mmol, 2.0 or 4.0 equiv). The reaction was stopped after stirring for 18 h at room temperature. Clean formation of Me<sub>3</sub>Si<sup>+</sup>[CHB<sub>11</sub>H<sub>5</sub>Br<sub>6</sub>]<sup>-</sup> was monitored by NMR spectroscopic analysis.

Single crystals of  $\text{Me}_3\text{Si}^+[\text{CHB}_{11}\text{H}_5\text{Br}_6]^-$  suitable for X-ray diffraction were obtained from a solution in  $o\text{-F}_2\text{C}_6\text{D}_4$  by vapor diffusion with *n*-hexane at room temperature (cf. Figure S61). CCDC 1818576 contains the supplementary crystallographic data. These data are provided free of charge by The Cambridge Crystallographic Data Centre.

$^1\text{H}$  NMR (500 MHz,  $o\text{-Cl}_2\text{C}_6\text{D}_4$ , 300 K):  $\delta$  0.83 (s, 9H,  $\text{SiCH}_3$ ), ~1.9–3.4 (br m, 6H,  $[\text{CHB}_{11}\text{H}_5\text{Br}_6]^-$ ) ppm.  $^{11}\text{B}$  NMR (161 MHz,  $o\text{-Cl}_2\text{C}_6\text{D}_4$ , 300 K):  $\delta$  -20.0 (d,  $^1J(\text{B},\text{H}) = 143$  Hz), -9.3 (s), -1.4 (s) ppm.  $^{13}\text{C}\{^1\text{H}\}$  DEPT NMR (126 MHz,  $o\text{-Cl}_2\text{C}_6\text{D}_4$ , 300 K):  $\delta$  3.3 ( $\text{SiCH}_3$ ), 41.0 ( $[\text{CHB}_{11}\text{H}_5\text{Br}_6]^-$ ) ppm.  $^1\text{H}/^{29}\text{Si}$  HMQC NMR (500/99 MHz,  $o\text{-Cl}_2\text{C}_6\text{D}_4$ , 300 K, optimized for  $J = 7$  Hz):  $\delta$  0.83/93.4 ppm.

### 5.7 Reaction of $\text{Me}_2(\text{C}_6\text{Me}_5)\text{SiH}$ with $\text{Ph}_3\text{C}^+[\text{B}(\text{C}_6\text{F}_5)_4]^-$ : Generation of $(\text{C}_6\text{Me}_5)_3\text{Si}^+[\text{B}(\text{C}_6\text{F}_5)_4]^-$ (Table 1, Entry 7)

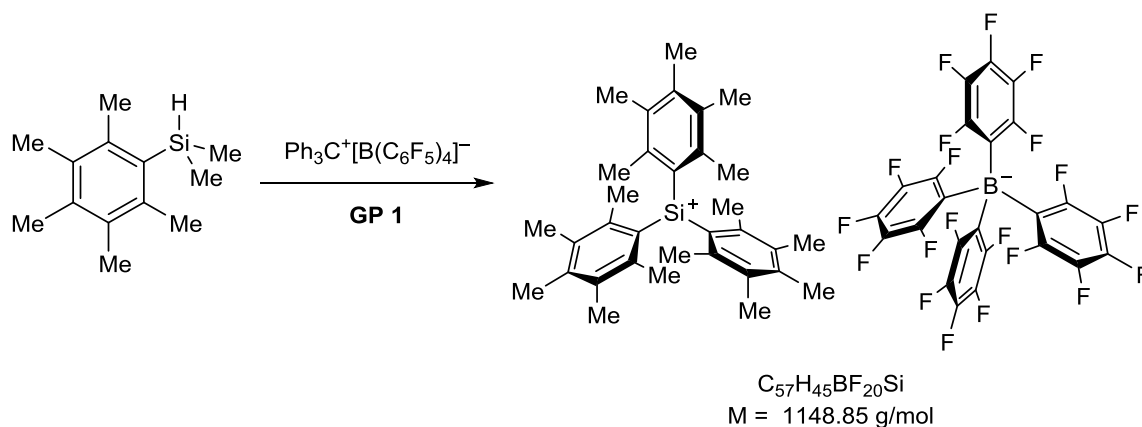

According to **GP 1**,  $\text{Ph}_3\text{C}^+[\text{B}(\text{C}_6\text{F}_5)_4]^-$  (23 mg, 0.025 mmol, 1.0 equiv) was treated with  $\text{Me}_2(\text{C}_6\text{Me}_5)\text{SiH}$  (21 mg, 0.10 mmol, 4.0 equiv). NMR spectroscopic analysis revealed formation of  $(\text{C}_6\text{Me}_5)_3\text{Si}^+[\text{B}(\text{C}_6\text{F}_5)_4]^-$  along with minor impurities.

The NMR spectroscopic data are consistent with those reported in **5.1**.

### 5.8 Reaction of $\text{Me}_2(\text{C}_6\text{Me}_5)\text{SiH}$ with $\text{Ph}_3\text{C}^+[\text{CHB}_{11}\text{H}_5\text{Br}_6]^-$ : Generation of $\text{Me}_3\text{Si}^+[\text{CHB}_{11}\text{H}_5\text{Br}_6]^-$ (Table 1, Entry 8)

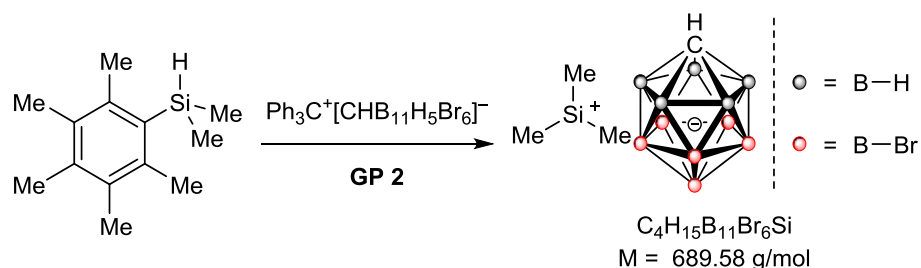

According to **GP 2**,  $\text{Ph}_3\text{C}^+[\text{CHB}_{11}\text{H}_5\text{Br}_6]^-$  (20 mg, 0.023 mmol, 1.0 equiv) was treated with  $\text{Me}_2(\text{C}_6\text{Me}_5)\text{SiH}$  (19 mg, 0.092 mmol, 4.0 equiv). The reaction was stopped after stirring for 72 h at 50 °C. The NMR spectra showed the formation of  $\text{Me}_3\text{Si}^+[\text{CHB}_{11}\text{H}_5\text{Br}_6]^-$  along with minor amounts of  $(\text{C}_6\text{Me}_5)_3\text{Si}^+[\text{CHB}_{11}\text{H}_5\text{Br}_6]^-$ .

The NMR spectroscopic data are consistent with those reported in **5.6**.

### 5.9 Reaction of $\text{Et}_2\text{PhSiH}$ with $\text{Ph}_3\text{C}^+[\text{CHB}_{11}\text{H}_5\text{Br}_6]^-$ : Generation of $\text{Et}_3\text{Si}^+[\text{CHB}_{11}\text{H}_5\text{Br}_6]^-$ (Table 2, Entry 2)

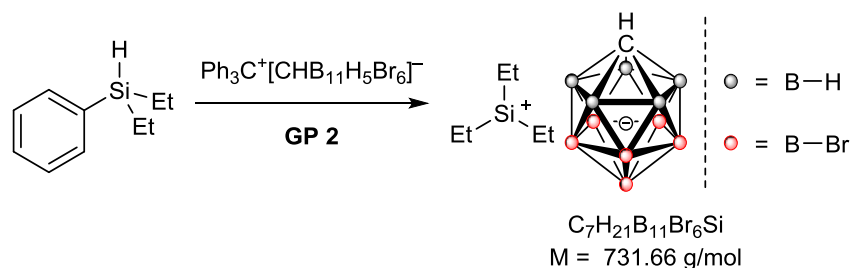

According to **GP 2**,  $\text{Ph}_3\text{C}^+[\text{CHB}_{11}\text{H}_5\text{Br}_6]^-$  (50 mg, 0.058 mmol, 1.0 equiv) was treated with  $\text{Et}_2\text{PhSiH}$  (38 mg, 0.23 mmol, 4.0 equiv). The reaction was stopped after stirring for 7 days at room temperature. Clean formation of  $\text{Et}_3\text{Si}^+[\text{CHB}_{11}\text{H}_5\text{Br}_6]^-$  was monitored by NMR spectroscopic analysis. Performing the reaction with less hydrosilane (2.0 equiv) for 18 h allowed for the detection of small amounts of a second silylium ion, which was identified as unscrambled  $\text{Et}_2\text{PhSi}^+[\text{CHB}_{11}\text{H}_5\text{Br}_6]^-$  (ratio ~90:10).

**$^1\text{H}$  NMR** (500 MHz,  $o\text{-Cl}_2\text{C}_6\text{D}_4$ , 298 K):  $\delta$  0.94 (t,  $^3J(\text{H},\text{H}) = 7.8$  Hz, 9H,  $\text{SiCH}_2\text{CH}_3$ ), 1.19 (q,  $^3J(\text{H},\text{H}) = 7.8$  Hz, 6H,  $\text{SiCH}_2\text{CH}_3$ ), ~1.9–3.4 (br m, 6H,  $[\text{CHB}_{11}\text{H}_5\text{Br}_6]^-$ ) ppm.  **$^{11}\text{B}$  NMR** (161 MHz,  $o\text{-Cl}_2\text{C}_6\text{D}_4$ , 298 K):  $\delta$  -19.9 (br s), -9.0 (s), -1.1 (s) ppm.  **$^{13}\text{C}\{^1\text{H}\}$  DEPT NMR** (126 MHz,  $o\text{-Cl}_2\text{C}_6\text{D}_4$ , 298 K):  $\delta$  5.9 ( $\text{SiCH}_2\text{CH}_3$ ), 7.6 ( $\text{SiCH}_2\text{CH}_3$ ), 41.0 ( $[\text{CHB}_{11}\text{H}_5\text{Br}_6]^-$ ) ppm.



$^1\text{H}/^{29}\text{Si}$  HMQC NMR (500/99 MHz,  $o\text{-Cl}_2\text{C}_6\text{D}_4$ , 298 K, optimized for  $J = 7$  Hz):  $\delta$  0.94/101.1, 1.19/101.1 ppm.

Selected NMR spectroscopic data for  $\text{Et}_2\text{PhSi}^+[\text{CHB}_{11}\text{H}_5\text{Br}_6]^-$ :

$^1\text{H}$  NMR (500 MHz,  $o\text{-Cl}_2\text{C}_6\text{D}_4$ , 298 K):  $\delta$  1.06 (t,  $^3J(\text{H,H}) = 7.9$  Hz, 6H,  $\text{SiCH}_2\text{CH}_3$ ), 1.53 (q,  $^3J(\text{H,H}) = 7.9$  Hz, 4H,  $\text{SiCH}_2\text{CH}_3$ ), 7.33 (dd,  $^3J(\text{H,H}) = 7.6$  Hz,  $^3J(\text{H,H}) = 7.4$  Hz, 2H,  $m\text{-H}_{\text{Ar}}$ ), 7.44 (t,  $^3J(\text{H,H}) = 7.6$  Hz, 1H,  $p\text{-H}_{\text{Ar}}$ ), 7.51 (d,  $^3J(\text{H,H}) = 7.4$  Hz, 2H,  $o\text{-H}_{\text{Ar}}$ ) ppm.  $^1\text{H}/^{29}\text{Si}$  HMQC NMR (500/99 MHz,  $o\text{-Cl}_2\text{C}_6\text{D}_4$ , 298 K, optimized for  $J = 7$  Hz):  $\delta$  1.06/76.0, 1.53/76.0, 7.51/76.0 ppm.

### 5.10 Independent Synthesis of $\text{Et}_3\text{Si}^+[\text{CHB}_{11}\text{H}_5\text{Br}_6]^-$ from the Reaction of $\text{Et}_3\text{SiH}$ with $\text{Ph}_3\text{C}^+[\text{CHB}_{11}\text{H}_5\text{Br}_6]^-$

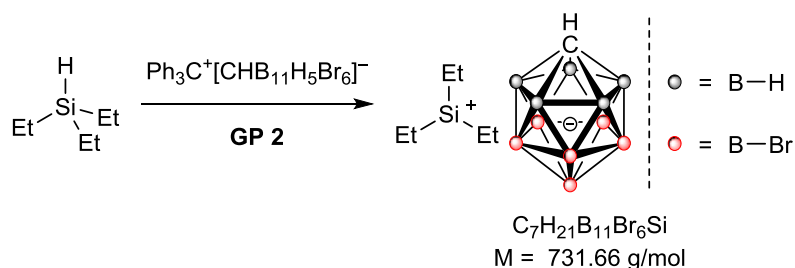

According to **GP 2**,  $\text{Ph}_3\text{C}^+[\text{CHB}_{11}\text{H}_5\text{Br}_6]^-$  (20 mg, 0.023 mmol, 1.0 equiv) was treated with  $\text{Et}_3\text{SiH}$  (5.4 mg, 0.046 mmol, 2.0 equiv). The reaction was stopped after stirring for 18 h at room temperature. Clean formation of  $\text{Et}_3\text{Si}^+[\text{CHB}_{11}\text{H}_5\text{Br}_6]^-$  was monitored by NMR spectroscopic analysis.

The NMR spectroscopic data are consistent with those reported in **5.9**.

### 5.11 Reaction of $i\text{Pr}_2\text{PhSiH}$ with $\text{Ph}_3\text{C}^+[\text{CHB}_{11}\text{H}_5\text{Br}_6]^-$ : Generation of $i\text{Pr}_2\text{PhSi}^+[\text{CHB}_{11}\text{H}_5\text{Br}_6]^-$ (Table 2, Entry 3)

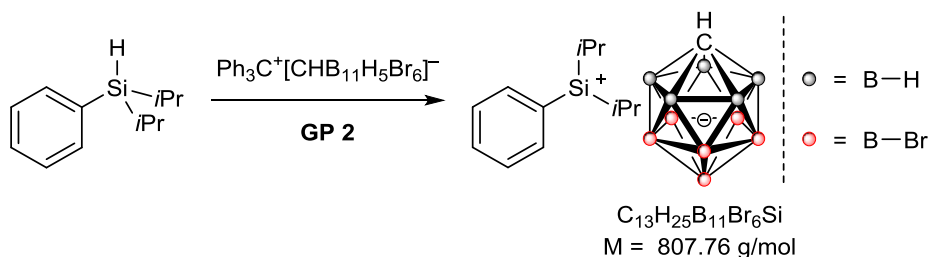

According to **GP 2**,  $\text{Ph}_3\text{C}^+[\text{CHB}_{11}\text{H}_5\text{Br}_6]^-$  (20 mg, 0.023 mmol, 1.0 equiv) was treated with  $i\text{Pr}_2\text{PhSiH}$  (9.0 mg, 0.46 mmol, 2.0 equiv). The reaction was stopped after stirring for 24 h at room temperature. Clean formation of  $i\text{Pr}_2\text{PhSi}^+[\text{CHB}_{11}\text{H}_5\text{Br}_6]^-$  was monitored by NMR spectroscopic analysis.

Single crystals of  $i\text{Pr}_2\text{PhSi}^+[\text{CHB}_{11}\text{H}_5\text{Br}_6]^-$  suitable for X-ray diffraction were obtained from a solution in  $o\text{-Cl}_2\text{C}_6\text{D}_4$  by vapor diffusion with  $n$ -hexane at room temperature (cf. Figure S62). CCDC 1818581 contains the supplementary crystallographic data. These data are provided free of charge by The Cambridge Crystallographic Data Centre.

**$^1\text{H}$  NMR** (500 MHz,  $o\text{-Cl}_2\text{C}_6\text{D}_4$ , 298 K):  $\delta$  1.16 (d,  $^3J(\text{H,H}) = 7.5$  Hz, 12H,  $\text{SiCHCH}_3$ ), 1.18 (sept,  $^3J(\text{H,H}) = 7.5$  Hz, 2H,  $\text{SiCHCH}_3$ ),  $\sim 1.6\text{--}3.1$  (br m, 6H,  $[\text{CHB}_{11}\text{H}_5\text{Br}_6]^-$ ), 7.38 (dd,  $^3J(\text{H,H}) = 7.6$  Hz,  $^3J(\text{H,H}) = 7.5$  Hz, 2H,  $m\text{-H}_{\text{Ar}}$ ), 7.46 (t,  $^3J(\text{H,H}) = 7.4$  Hz, 1H,  $p\text{-H}_{\text{Ar}}$ ), 7.59 (d,  $^3J(\text{H,H}) = 7.6$  Hz, 2H,  $o\text{-H}_{\text{Ar}}$ ) ppm.  **$^{11}\text{B}$  NMR** (161 MHz,  $o\text{-Cl}_2\text{C}_6\text{D}_4$ , 298 K):  $\delta$   $-20.8$  (br s),  $-9.2$  (s),  $-1.4$  (s) ppm.  **$^{13}\text{C}\{^1\text{H}\}$  NMR** (126 MHz,  $o\text{-Cl}_2\text{C}_6\text{D}_4$ , 298 K):  $\delta$  15.9 ( $\text{SiCHCH}_3$ ), 17.4 ( $\text{SiCHCH}_3$ ), 41.0 ( $[\text{CHB}_{11}\text{H}_5\text{Br}_6]^-$ ), 123.9 ( $i\text{-C}_{\text{Ar}}$ ), 129.3 ( $m\text{-C}_{\text{Ar}}$ ), 134.2 ( $p\text{-C}_{\text{Ar}}$ ), 135.8 ( $o\text{-C}_{\text{Ar}}$ ) ppm.  **$^1\text{H}/^{29}\text{Si}$  HMQC NMR** (500/99 MHz,  $o\text{-Cl}_2\text{C}_6\text{D}_4$ , 298 K, optimized for  $J = 7$  Hz):  $\delta$  1.16/76.0, 1.18/76.0, 7.59/76.0 ppm.

### 5.12 Reaction of $t\text{Bu}_2\text{PhSiH}$ with $\text{Ph}_3\text{C}^+[\text{CHB}_{11}\text{H}_5\text{Br}_6]^-$ (Table 2, Entry 4)

According to **GP 2**,  $\text{Ph}_3\text{C}^+[\text{CHB}_{11}\text{H}_5\text{Br}_6]^-$  (20 mg, 0.023 mmol, 1.0 equiv) was treated with  $t\text{Bu}_2\text{PhSiH}$  (10 mg, 0.45 mmol, 2.0 equiv). The reaction was stopped after stirring for 48 h at room temperature. NMR spectroscopic analysis of the precipitate showed only trityl salt, and no silicon species was detected in the  $^1\text{H}/^{29}\text{Si}$  HMQC NMR spectrum.

### 5.13 Reaction of $\text{Me}_2\text{BnSiH}$ with $\text{Ph}_3\text{C}^+[\text{CHB}_{11}\text{H}_5\text{Br}_6]^-$ : Generation of $\text{Me}_3\text{Si}^+[\text{CHB}_{11}\text{H}_5\text{Br}_6]^-$ (Table 2, Entry 2)

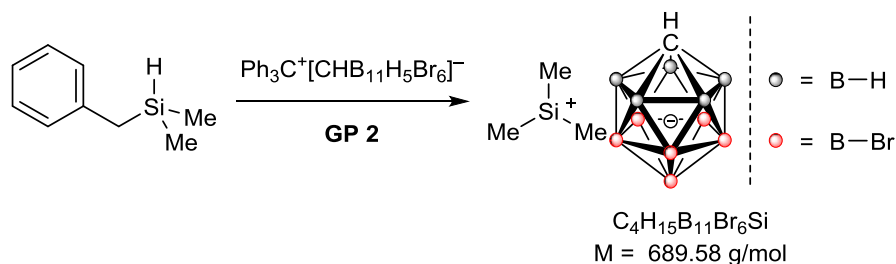

According to **GP 2**,  $\text{Ph}_3\text{C}^+[\text{CHB}_{11}\text{H}_5\text{Br}_6]^-$  (20 mg, 0.023 mmol, 1.0 equiv) was treated with  $\text{Me}_2\text{BnSiH}$  (7.0 mg, 0.047 mmol, 2.0 equiv). The reaction was stopped after stirring for 18 h at room temperature. Clean formation of  $\text{Me}_3\text{Si}^+[\text{CHB}_{11}\text{H}_5\text{Br}_6]^-$  was monitored by NMR spectroscopic analysis.

The NMR spectroscopic data are consistent with those reported in **5.6**.

### 5.14 Reaction of $\text{Me}_2t\text{BuSiH}$ with $\text{Ph}_3\text{C}^+[\text{CHB}_{11}\text{H}_5\text{Br}_6]^-$ : Generation of $\text{Me}_2t\text{BuSi}^+[\text{CHB}_{11}\text{H}_5\text{Br}_6]^-$ (Table 2, Entry 3)

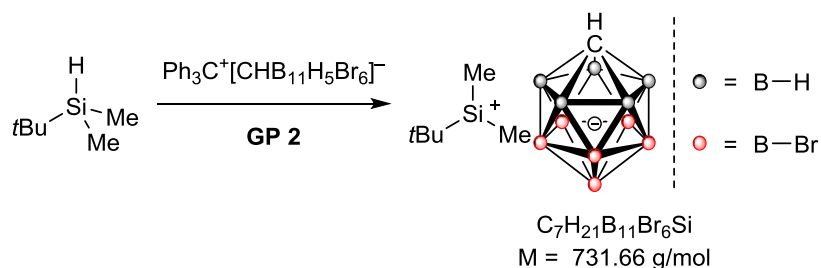

According to **GP 2**,  $\text{Ph}_3\text{C}^+[\text{CHB}_{11}\text{H}_5\text{Br}_6]^-$  (20 mg, 0.023 mmol, 1.0 equiv) was treated with  $\text{Me}_2t\text{BuSiH}$  (5.4 mg, 0.046 mmol, 2.0 equiv). The reaction was stopped after stirring for 24 h at room temperature. Clean formation of  $\text{Me}_2t\text{BuSi}^+[\text{CHB}_{11}\text{H}_5\text{Br}_6]^-$  was monitored by NMR spectroscopic analysis.

**$^1\text{H}$  NMR** (500 MHz,  $o\text{-Cl}_2\text{C}_6\text{D}_4$ , 300 K):  $\delta$  0.83 (s, 9H,  $\text{SiCCH}_3$ ), 0.88 (s, 3H,  $\text{SiCH}_3$ ), ~1.9–3.5 (br m, 6H,  $[\text{CHB}_{11}\text{H}_5\text{Br}_6]^-$ ) ppm.  **$^{11}\text{B}$  NMR** (161 MHz,  $o\text{-Cl}_2\text{C}_6\text{D}_4$ , 300 K):  $\delta$  -20.5 (br s), -9.2 (s), -1.2 (s) ppm.  **$^{13}\text{C}\{^1\text{H}\}$  NMR** (126 MHz,  $o\text{-Cl}_2\text{C}_6\text{D}_4$ , 300 K):  $\delta$  -0.9 ( $\text{SiCH}_3$ ), 22.4 ( $\text{SiCCH}_3$ ), 24.5 ( $\text{SiCCH}_3$ ), 41.5 ( $[\text{CHB}_{11}\text{H}_5\text{Br}_6]^-$ ) ppm.  **$^1\text{H}/^{29}\text{Si}$  HMQC NMR** (500/99 MHz,  $o\text{-Cl}_2\text{C}_6\text{D}_4$ , 300 K, optimized for  $J = 7$  Hz):  $\delta$  0.83/98.2, 0.88/98.2 ppm.

## 6 Mechanistic Control Experiments

### 6.1 Influence of the Carborane Counteranion on the Selectivity of the Trimethylsilylium Ion Formation (Scheme 2)

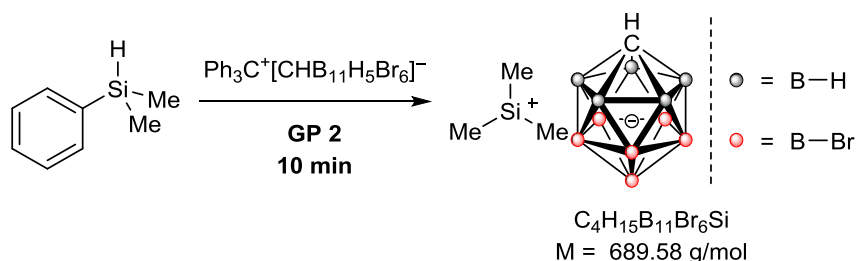

According to **GP 2**,  $\text{Ph}_3\text{C}^+[\text{CHB}_{11}\text{H}_5\text{Br}_6]^-$  (50 mg, 0.058 mmol, 1.0 equiv) was treated with  $\text{Me}_2\text{PhSiH}$  (16 mg, 0.12 mmol, 2.0 equiv). The reaction was stopped after stirring for 10 min at room temperature. Full conversion of the trityl salt was observed, as verified by  $^1\text{H}$  NMR spectroscopic analysis and indicated by the formation of a white suspension. NMR spectroscopic analysis revealed formation of  $\text{Me}_3\text{Si}^+[\text{CHB}_{11}\text{H}_5\text{Br}_6]^-$  along with small amounts of unscrambled  $\text{Me}_2\text{PhSi}^+[\text{CHB}_{11}\text{H}_5\text{Br}_6]^-$  (cf. **5.4**; ratio ~84:16).

### 6.2 Influence of the Borate Counteranion on the Selectivity of the Trimethylsilylium Ion Formation (Scheme 2)

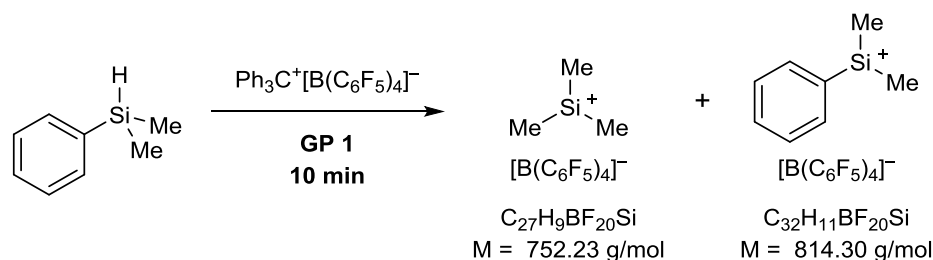

According to **GP 1**,  $\text{Ph}_3\text{C}^+[\text{B}(\text{C}_6\text{F}_5)_4]^-$  (23 mg, 0.025 mmol, 1.0 equiv) was treated with  $\text{Me}_2\text{PhSiH}$  (6.8 mg, 0.050 mmol, 2.0 equiv). The reaction was stopped after stirring for 10 min at room temperature. Full conversion of the trityl salt was observed, as verified by  $^1\text{H}$  NMR spectroscopic analysis. NMR spectroscopic analysis revealed formation of a mixture of  $\text{Me}_3\text{Si}^+[\text{B}(\text{C}_6\text{F}_5)_4]^-$  with unscrambled  $\text{Me}_2\text{PhSi}^+[\text{B}(\text{C}_6\text{F}_5)_4]^-$  (ratio ~51:49). Due to the low stability of these silylium ions, no  $^{13}\text{C}\{^1\text{H}\}$  NMR spectrum was measured.

Selected NMR spectroscopic data for  $\text{Me}_3\text{Si}^+[\text{B}(\text{C}_6\text{F}_5)_4]^-$ :

$^1\text{H}$  NMR (500 MHz,  $o\text{-Cl}_2\text{C}_6\text{D}_4$ , 300 K):  $\delta$  0.25 (s, 9H,  $\text{SiCH}_3$ ) ppm.  $^1\text{H}/^{29}\text{Si}$  HMQC NMR (500/99 MHz,  $o\text{-Cl}_2\text{C}_6\text{D}_4$ , 300 K, optimized for  $J = 7$  Hz):  $\delta$  0.25/90.0 ppm.

Selected NMR spectroscopic data for  $\text{Me}_2\text{PhSi}^+[\text{B}(\text{C}_6\text{F}_5)_4]^-$ :

$^1\text{H}$  NMR (500 MHz,  $o\text{-Cl}_2\text{C}_6\text{D}_4$ , 300 K):  $\delta$  0.58 (s, 3H,  $\text{SiCH}_3$ ), 7.03 (d,  $^3J(\text{H,H}) = 6.9$  Hz, 2H,  $o\text{-H}_{\text{Ar}}$ ), 7.19–7.22 (m, 2H,  $m\text{-H}_{\text{Ar}}$ ), 7.38 (t,  $^3J(\text{H,H}) = 7.3$  Hz, 1H,  $p\text{-H}_{\text{Ar}}$ ) ppm.  $^1\text{H}/^{29}\text{Si}$  HMQC NMR (500/99 MHz,  $o\text{-Cl}_2\text{C}_6\text{D}_4$ , 300 K, optimized for  $J = 7$  Hz):  $\delta$  0.58/69.9, 7.03/69.9 ppm.

### 6.3 Addition of $\text{Me}_2\text{PhSiH}$ to a Mixture of $\text{MePh}_2\text{Si}^+[\text{CHB}_{11}\text{H}_5\text{Br}_6]^-$ and $\text{Me}_2\text{PhSi}^+[\text{CHB}_{11}\text{H}_5\text{Br}_6]^-$ : Generation of $\text{Me}_3\text{Si}^+[\text{CHB}_{11}\text{H}_5\text{Br}_6]^-$ (Scheme 3)

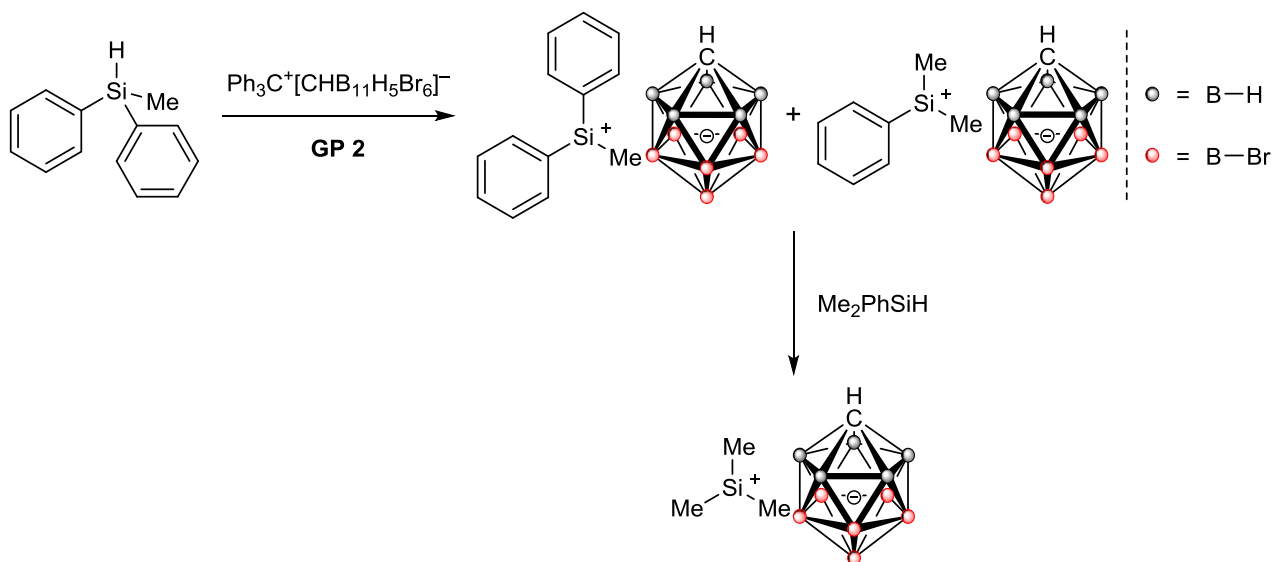

According to **GP 2**,  $\text{Ph}_3\text{C}^+[\text{CHB}_{11}\text{H}_5\text{Br}_6]^-$  (20 mg, 0.023 mmol, 1.0 equiv) was treated with  $\text{MePh}_2\text{SiH}$  (11 mg, 0.048 mmol, 2.1 equiv). After stirring for 22 h at room temperature, a pale yellow suspension was obtained. A solution of  $\text{Me}_2\text{PhSiH}$  (14 mg, 0.10 mmol, 4.4 equiv) in toluene (5 drops) was added, resulting in formation of a white suspension after stirring for 10 min. To ensure full conversion, the mixture was stirred for additional 22 h. *n*-Pentane (~1 mL) was added to allow full precipitation of all ionic components. The solid was collected by filtration, washed with *n*-pentane (~3 × 0.5 mL), briefly dried under vacuum, and dissolved in  $o\text{-Cl}_2\text{C}_6\text{D}_4$  (0.60 mL). NMR spectroscopic analysis revealed exclusive formation of  $\text{Me}_3\text{Si}^+[\text{CHB}_{11}\text{H}_5\text{Br}_6]^-$ .

The NMR spectroscopic data are consistent with those reported in **5.6**.

## 7 NMR Spectra

**Figure S1.**  $^1\text{H}$  NMR spectrum (500 MHz,  $\text{C}_6\text{D}_6$ , 300 K) of  $\text{Me}_2(\text{C}_6\text{Me}_5)\text{SiH}$ .

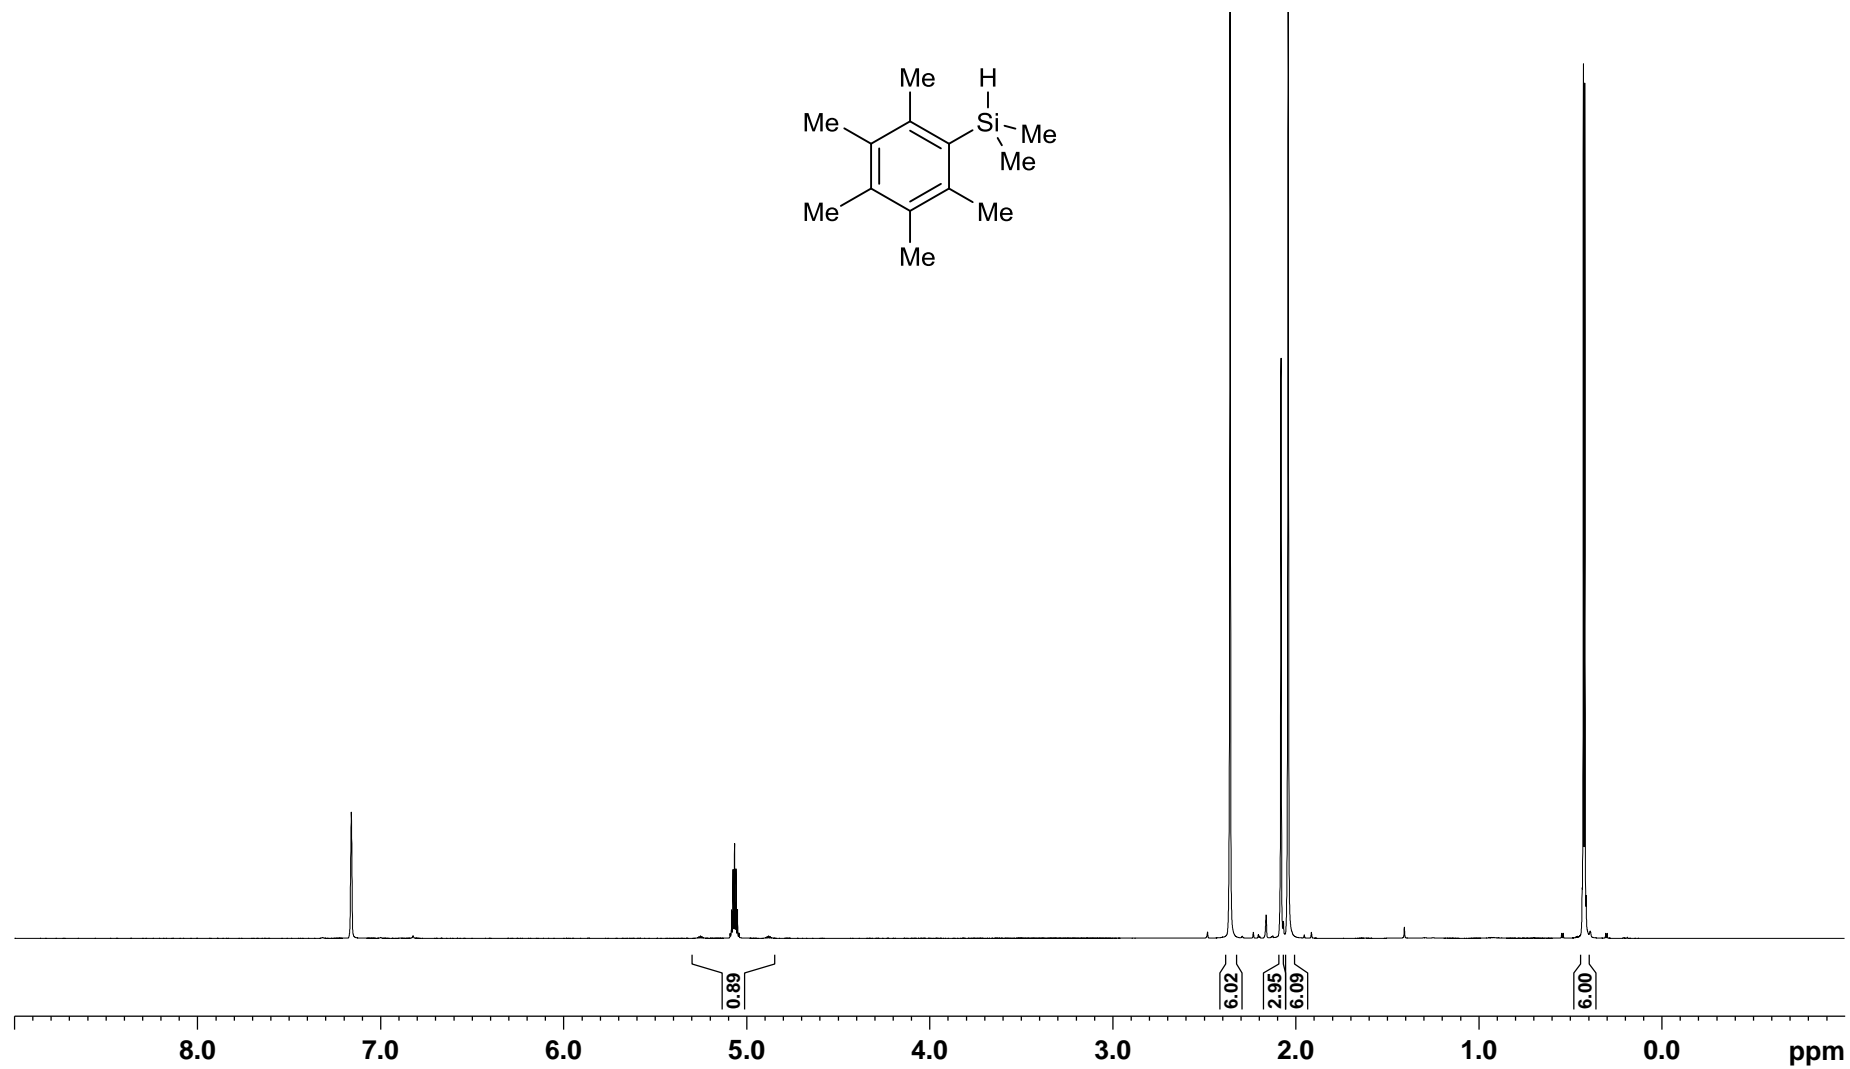

**Figure S2.**  $^{13}\text{C}\{^1\text{H}\}$  NMR spectrum (126 MHz,  $\text{C}_6\text{D}_6$ , 300 K) of  $\text{Me}_2(\text{C}_6\text{Me}_5)\text{SiH}$ .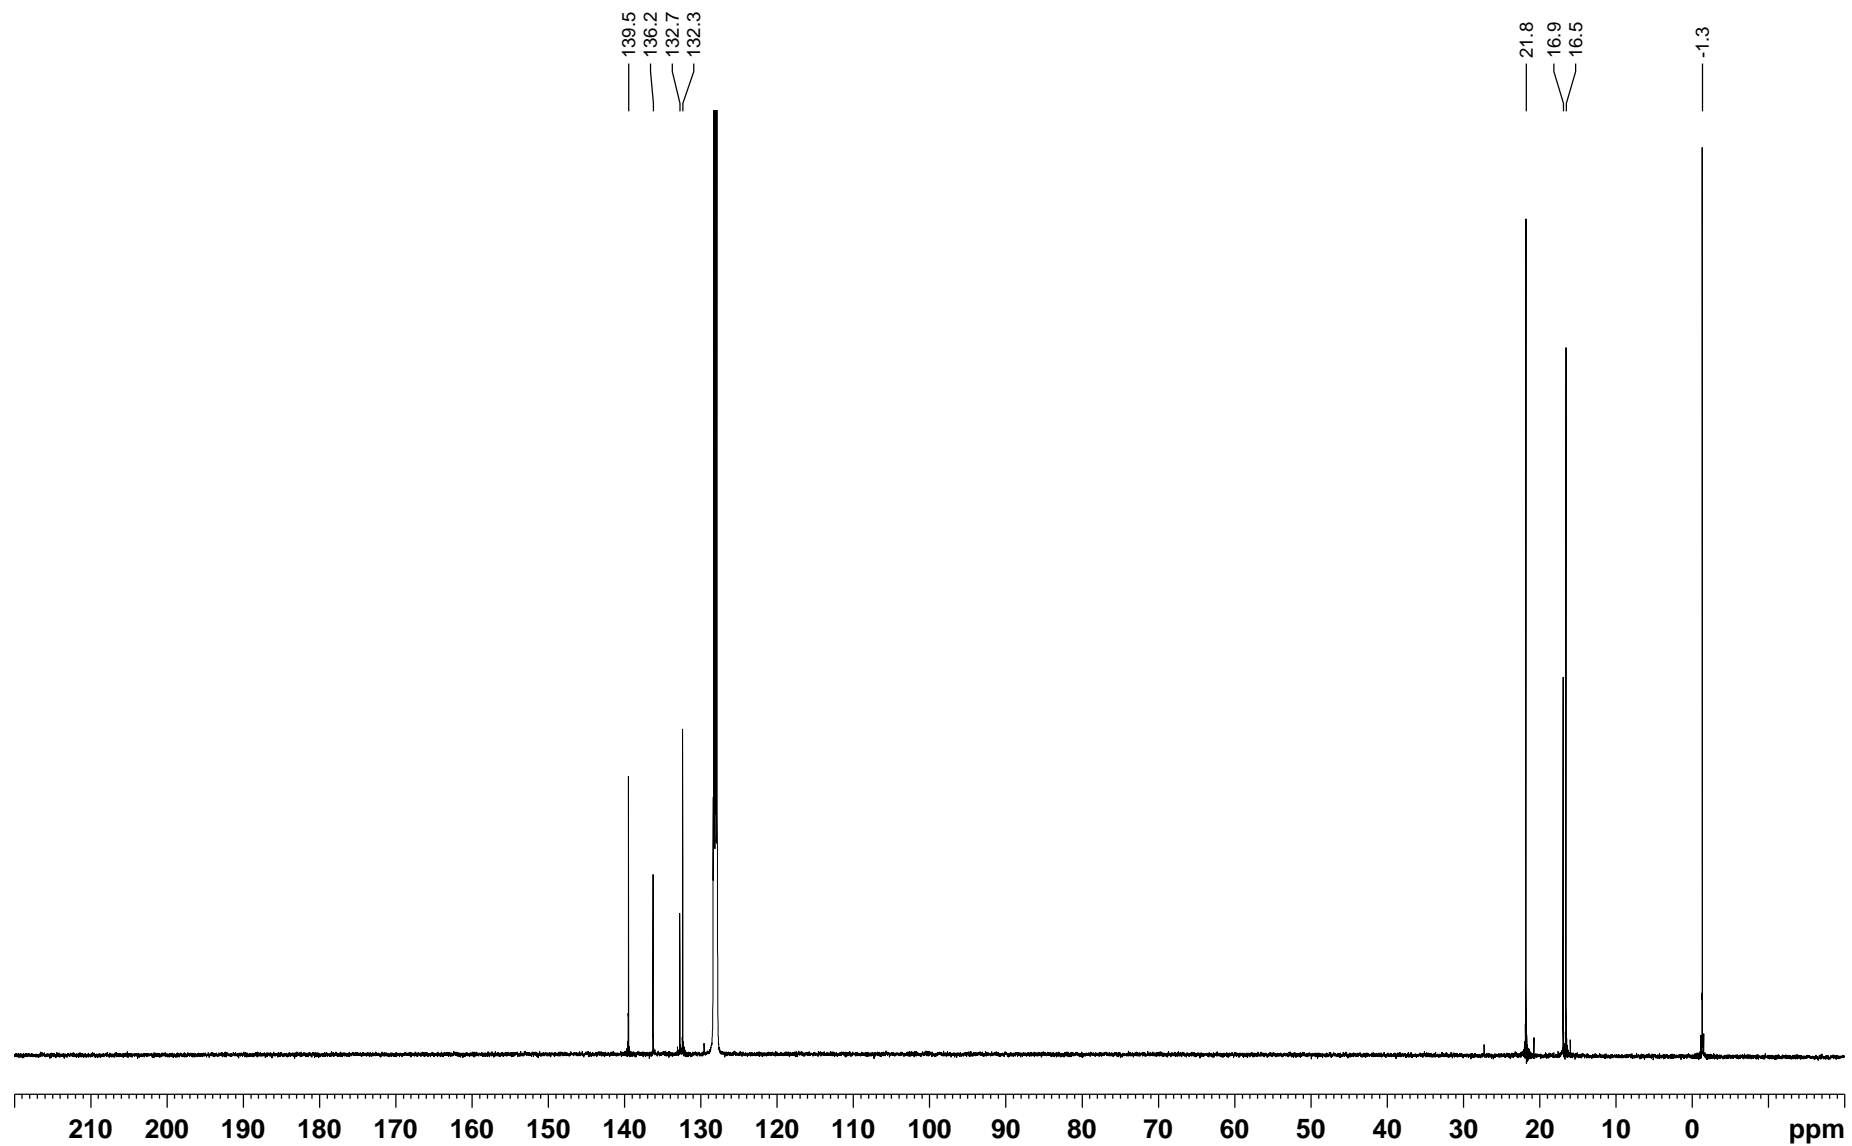

**Figure S3.**  $^{29}\text{Si}$  DEPT NMR spectrum (99 MHz,  $\text{C}_6\text{D}_6$ , 300 K, optimized for  $J = 200$  Hz) of  $\text{Me}_2(\text{C}_6\text{Me}_5)\text{SiH}$ .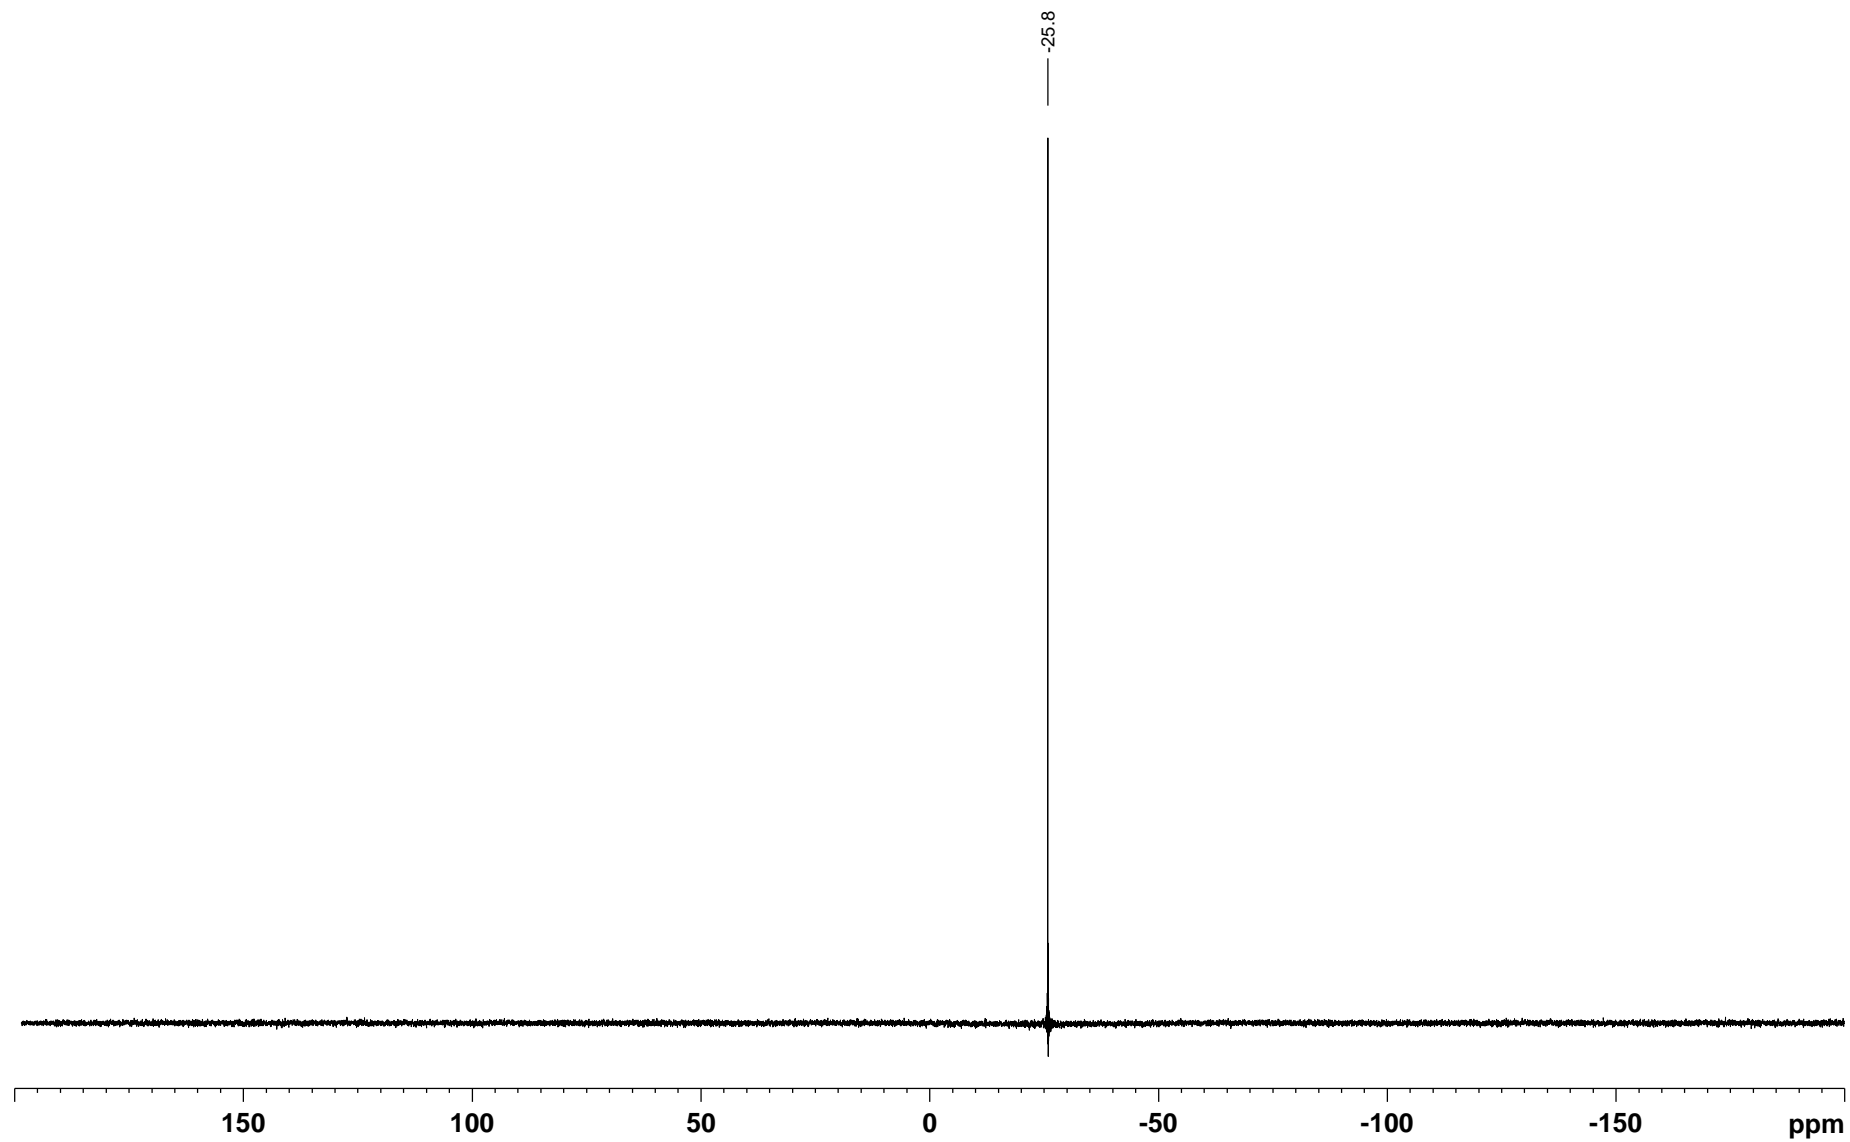



**Figure S4.**  $^1\text{H}$  NMR spectrum (500 MHz,  $\text{C}_6\text{D}_6$ , 300 K) of  $\text{Me}_2\text{BnSiH}$ .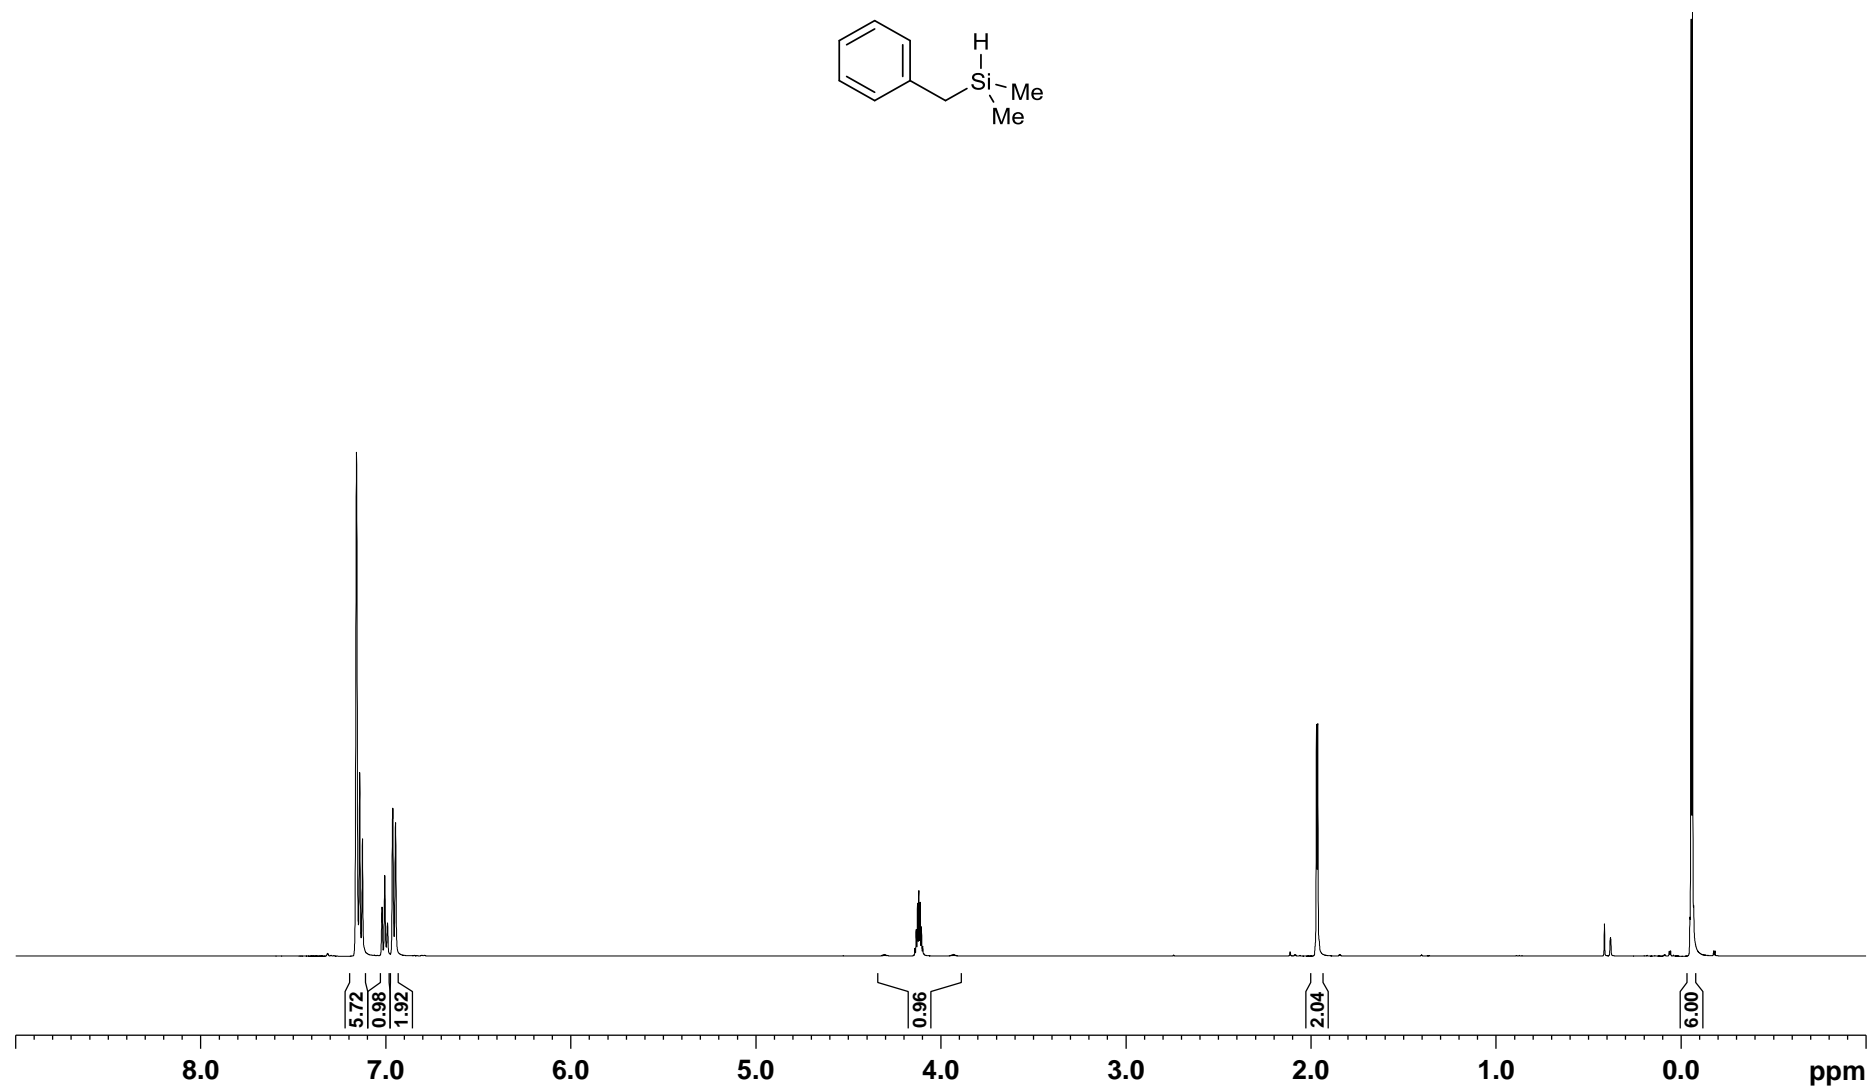

**Figure S5.**  $^{13}\text{C}\{^1\text{H}\}$  NMR spectrum (126 MHz,  $\text{C}_6\text{D}_6$ , 300 K) of  $\text{Me}_2\text{BnSiH}$ .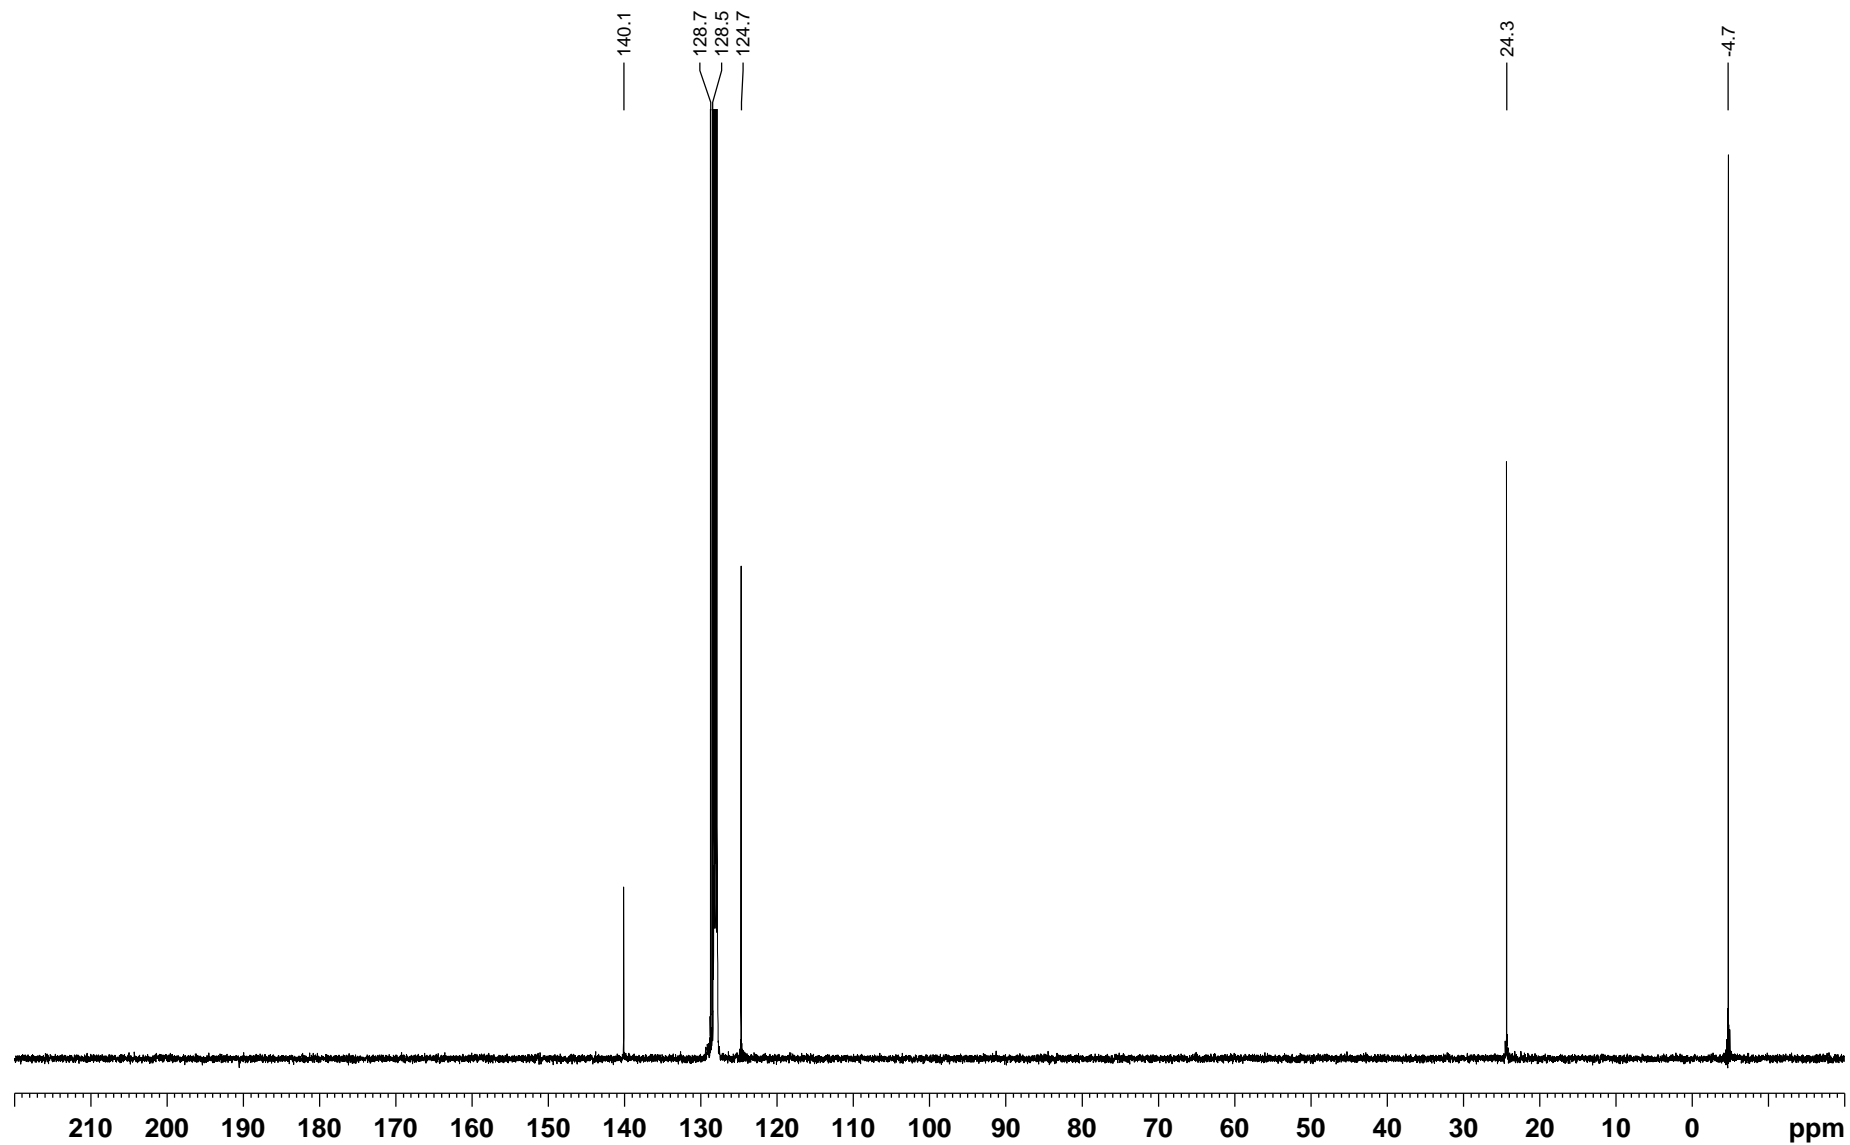

**Figure S6.**  $^{29}\text{Si}$  DEPT NMR spectrum (99 MHz,  $\text{C}_6\text{D}_6$ , 300 K, optimized for  $J = 200$  Hz) of  $\text{Me}_2\text{BnSiH}$ .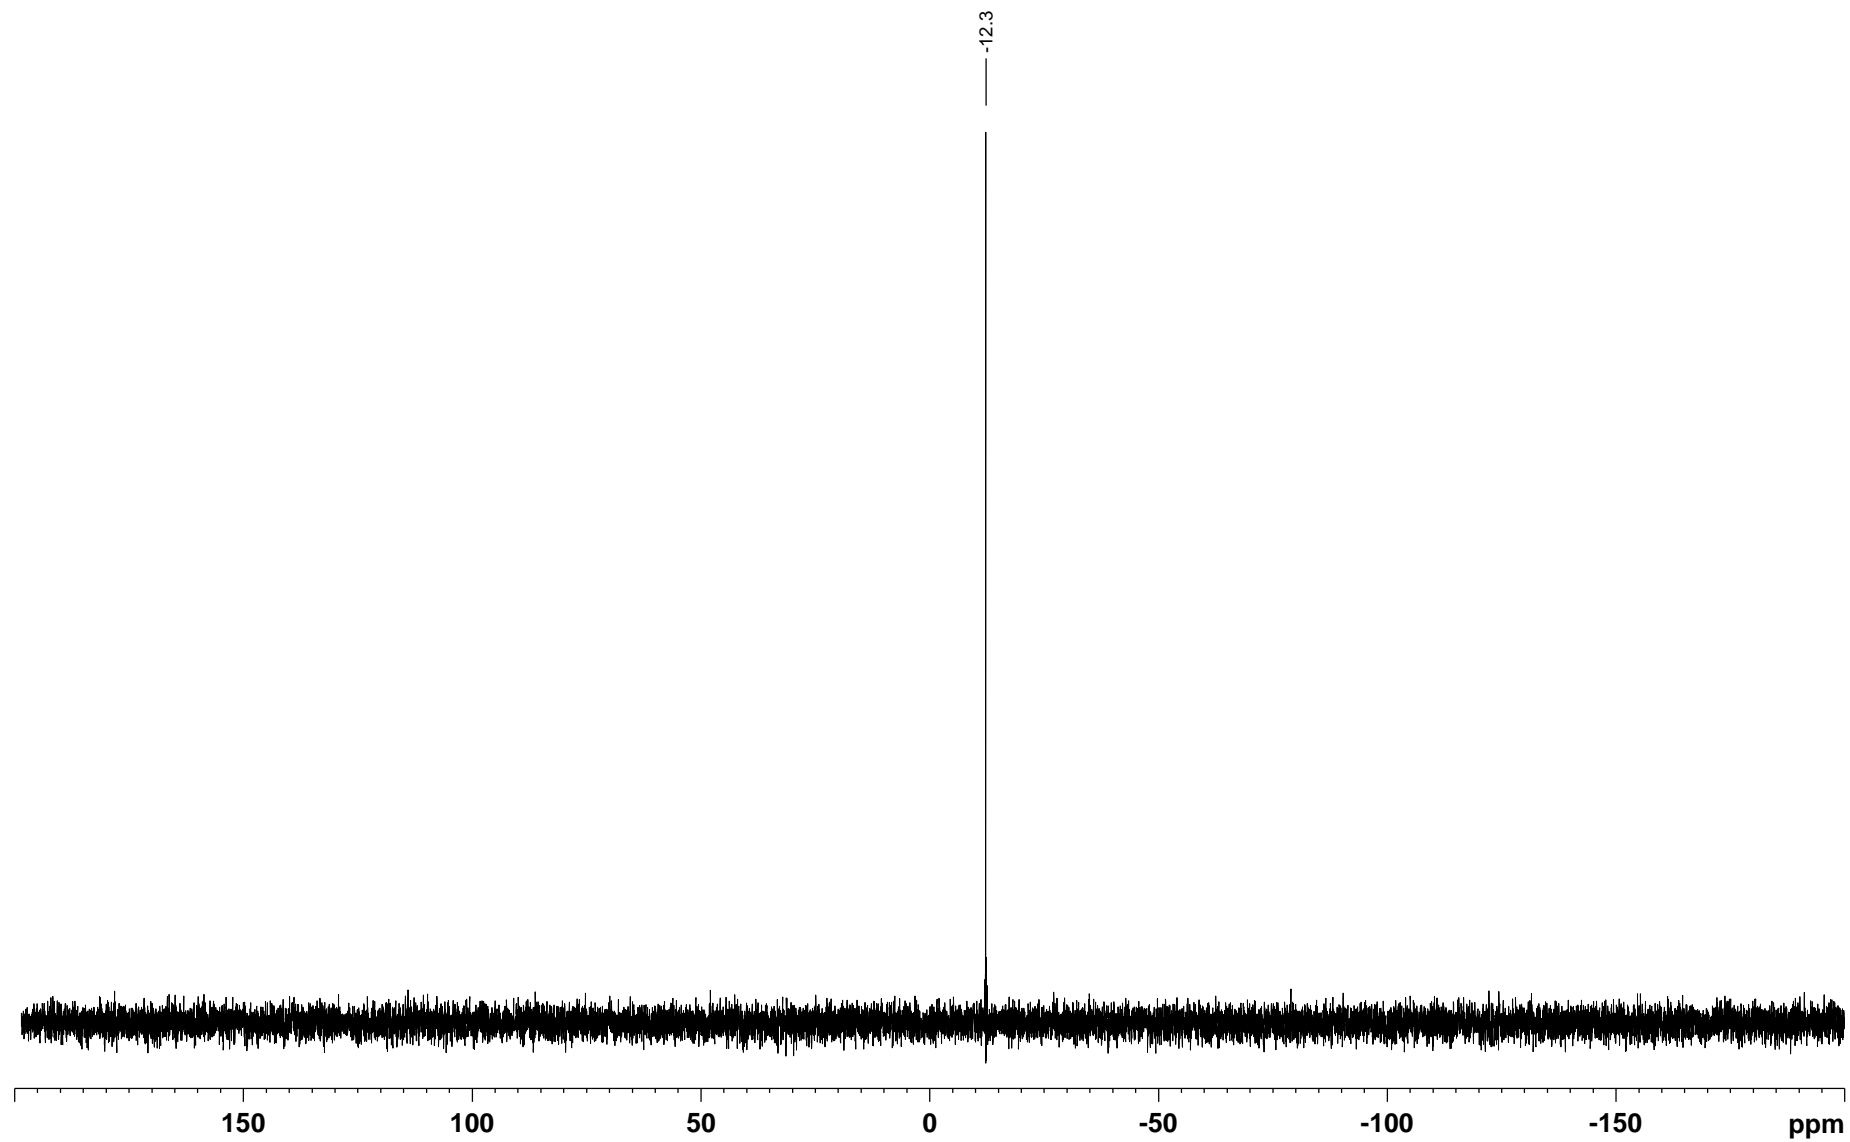

**Figure S7.**  $^1\text{H}$  NMR spectrum (500 MHz,  $\text{C}_6\text{D}_6$ , 298 K) of  $i\text{Pr}_2\text{PhSiH}$ .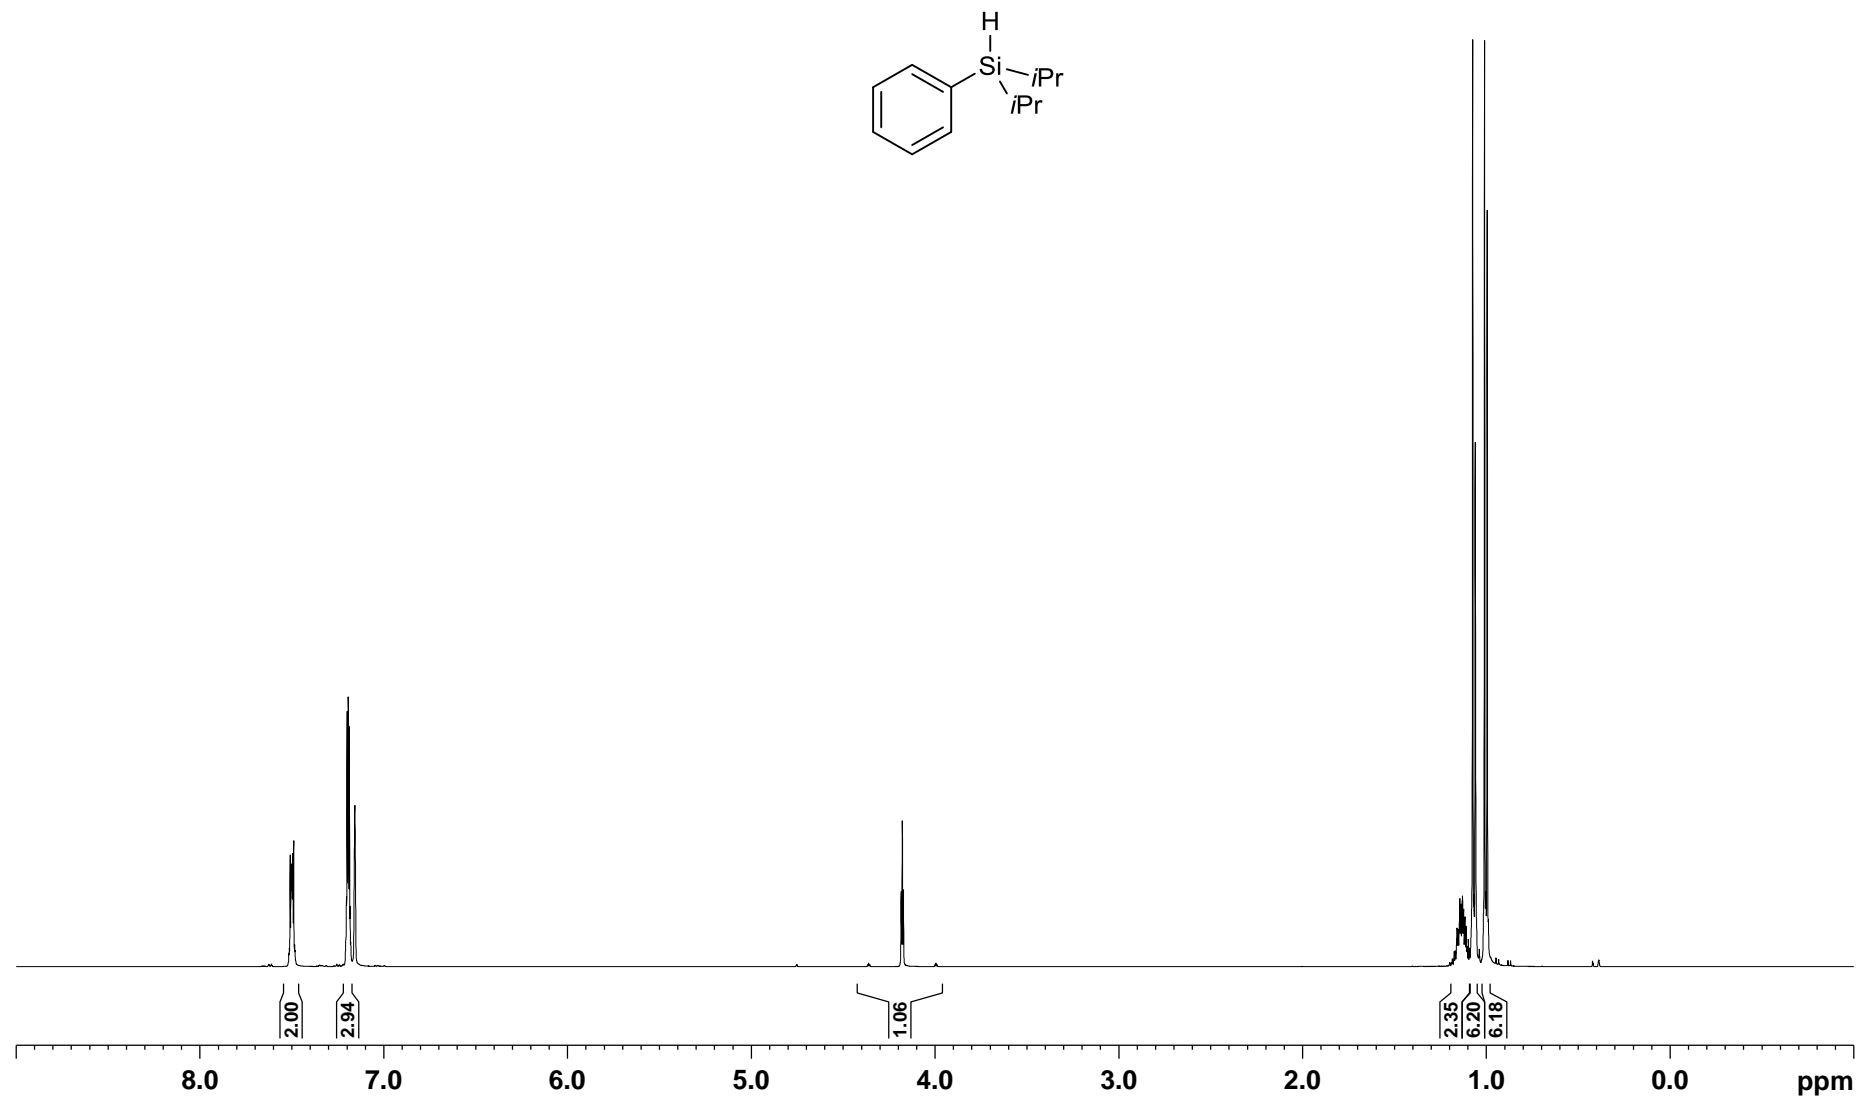

**Figure S8.**  $^{13}\text{C}\{^1\text{H}\}$  NMR spectrum (126 MHz,  $\text{C}_6\text{D}_6$ , 298 K) of  $i\text{Pr}_2\text{PhSiH}$ .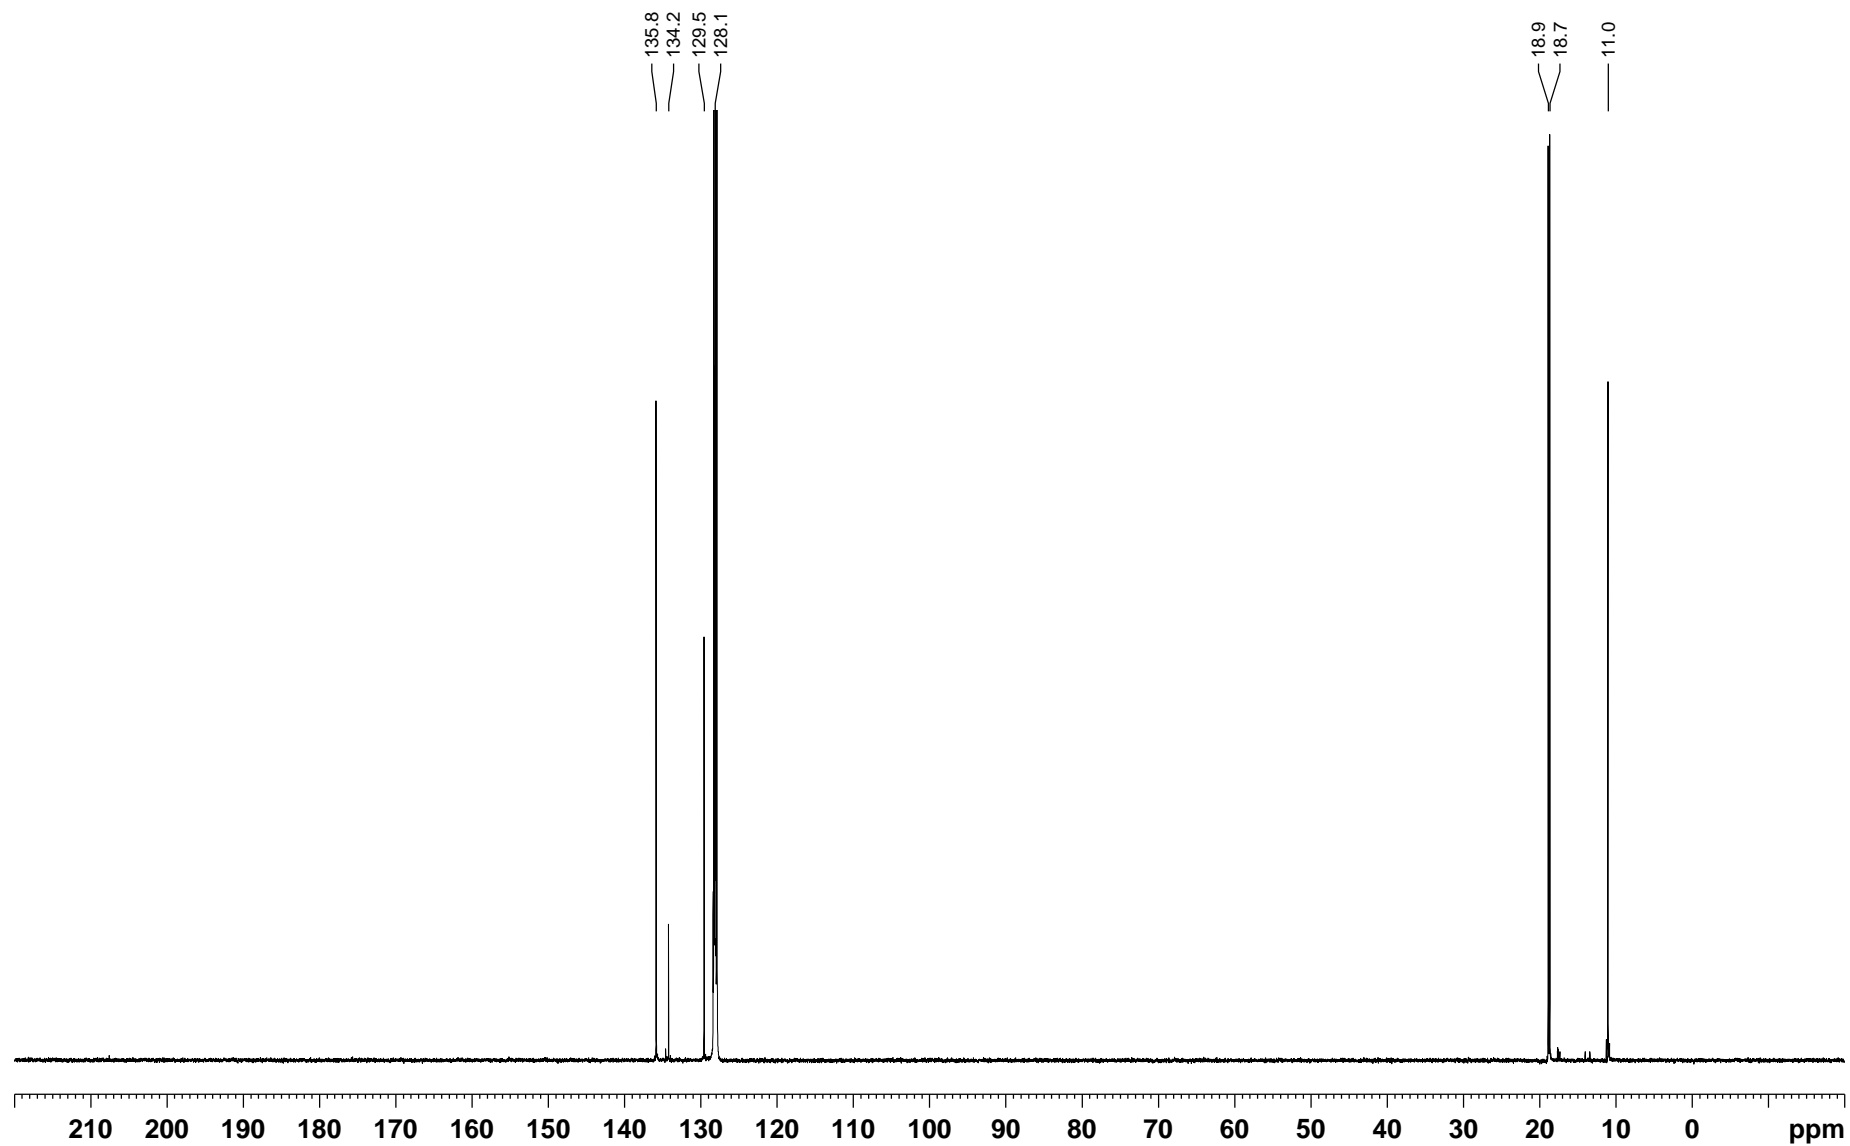

**Figure S9.**  $^{29}\text{Si}$  DEPT NMR spectrum (99 MHz,  $\text{C}_6\text{D}_6$ , 298 K, optimized for  $J = 200$  Hz) of  $i\text{Pr}_2\text{PhSiH}$ .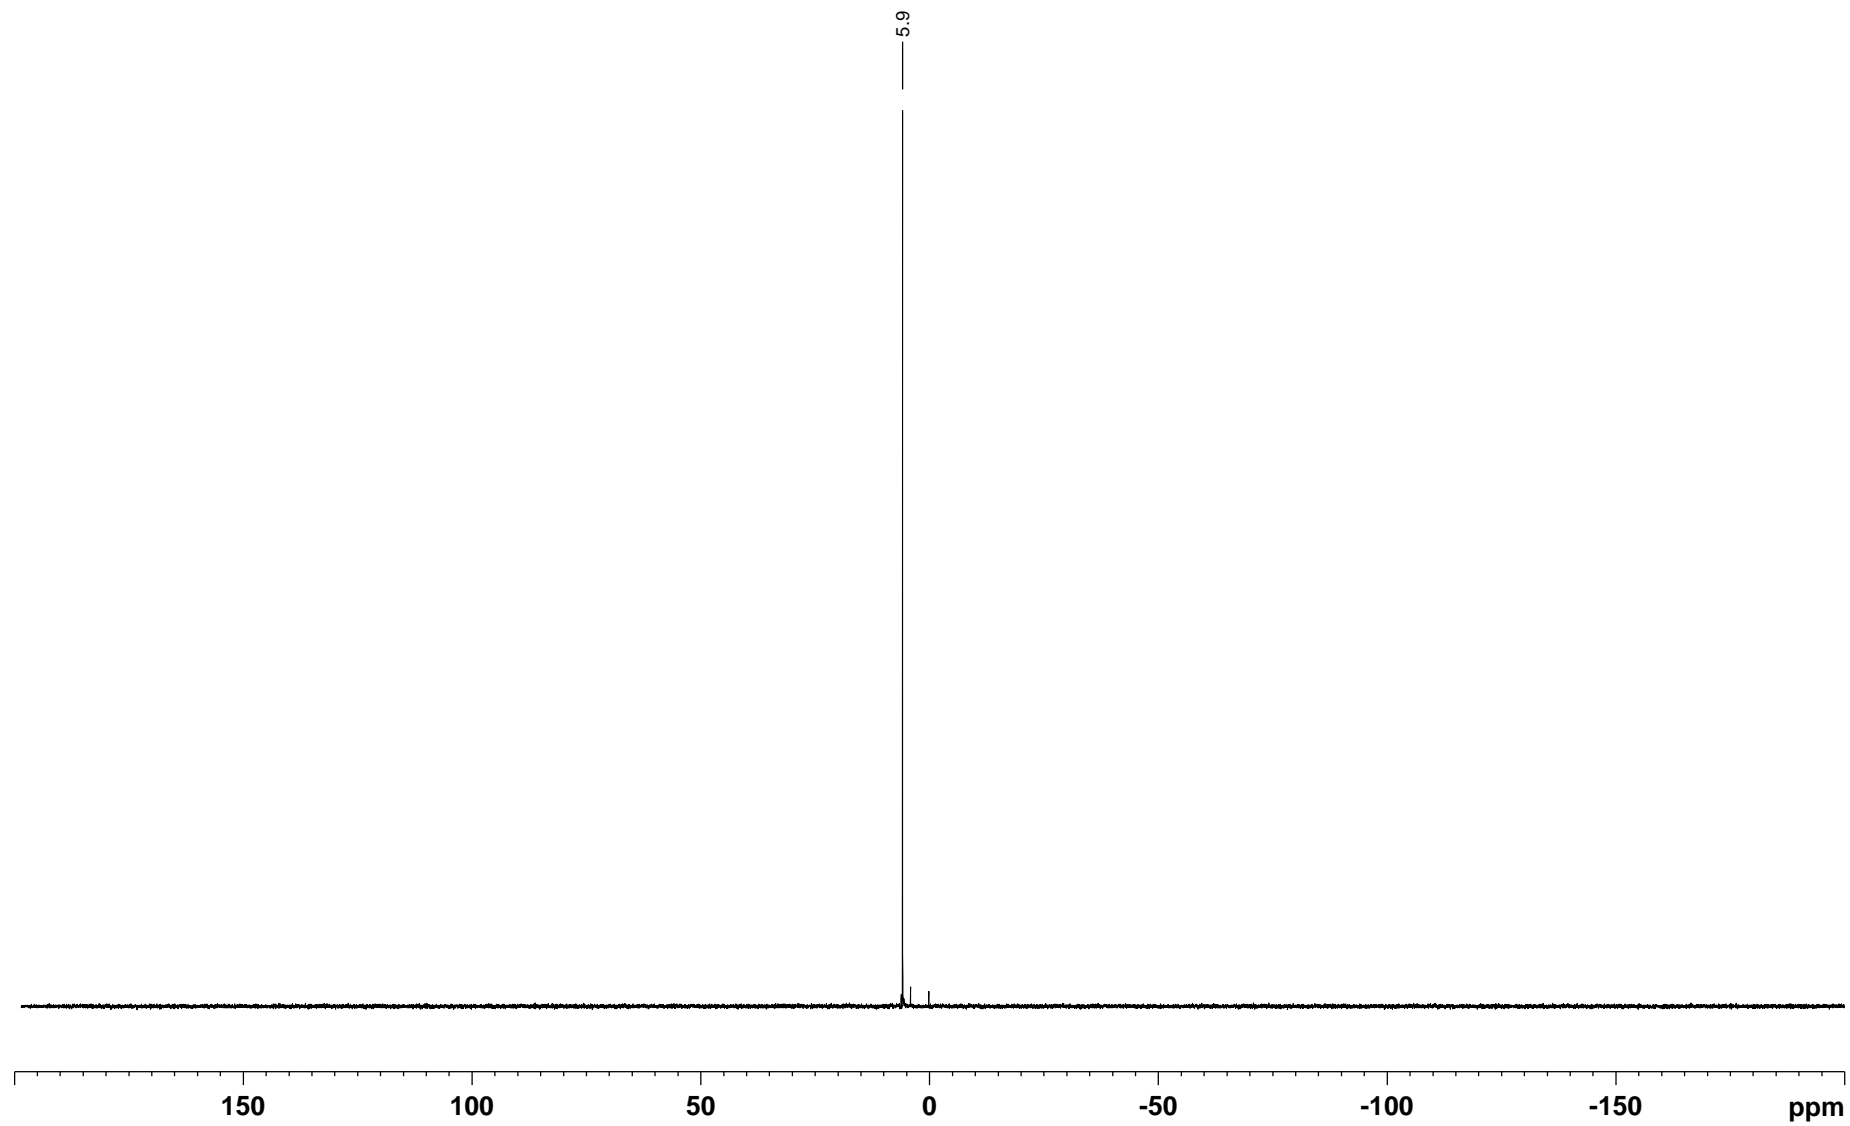

**Figure S10.**  $^1\text{H}$  NMR spectrum (500 MHz,  $\text{C}_6\text{D}_6$ , 300 K) of  $t\text{Bu}_2\text{PhSiH}$ .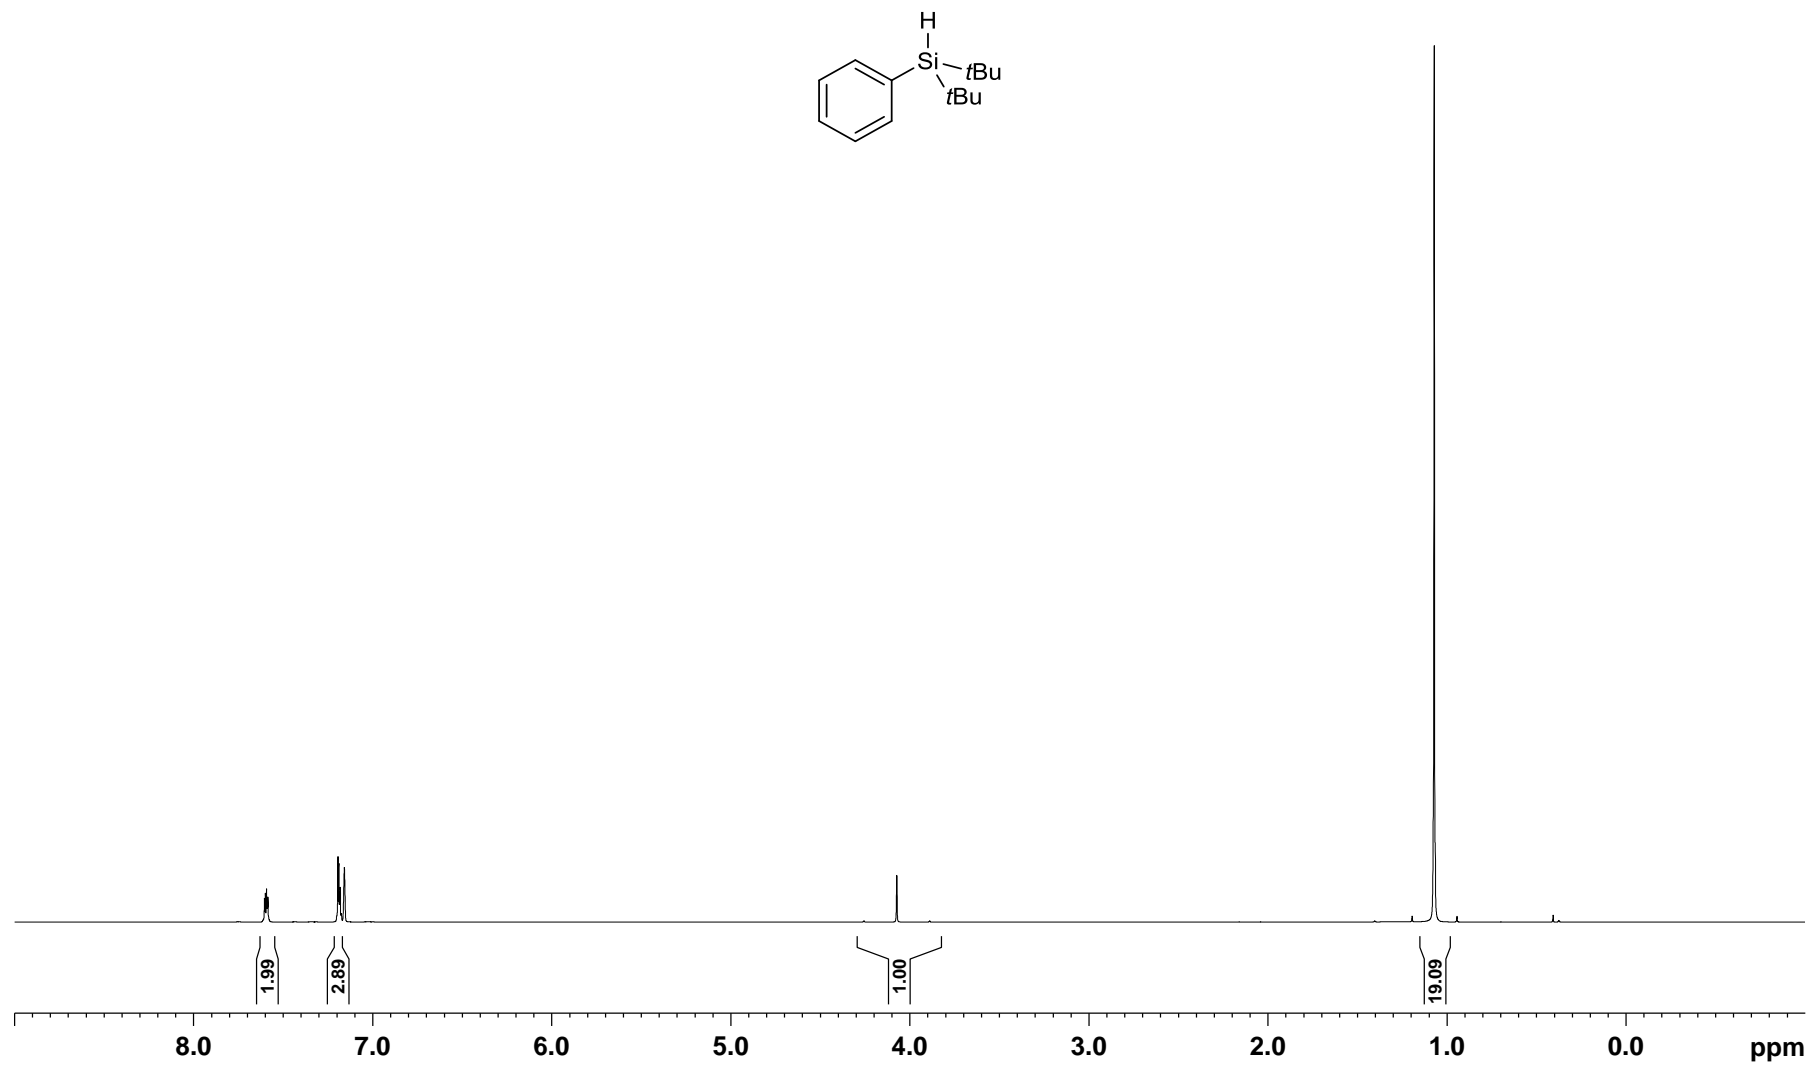

**Figure S11.**  $^{13}\text{C}\{^1\text{H}\}$  spectrum NMR (126 MHz,  $\text{C}_6\text{D}_6$ , 300 K) of  $t\text{Bu}_2\text{PhSiH}$ .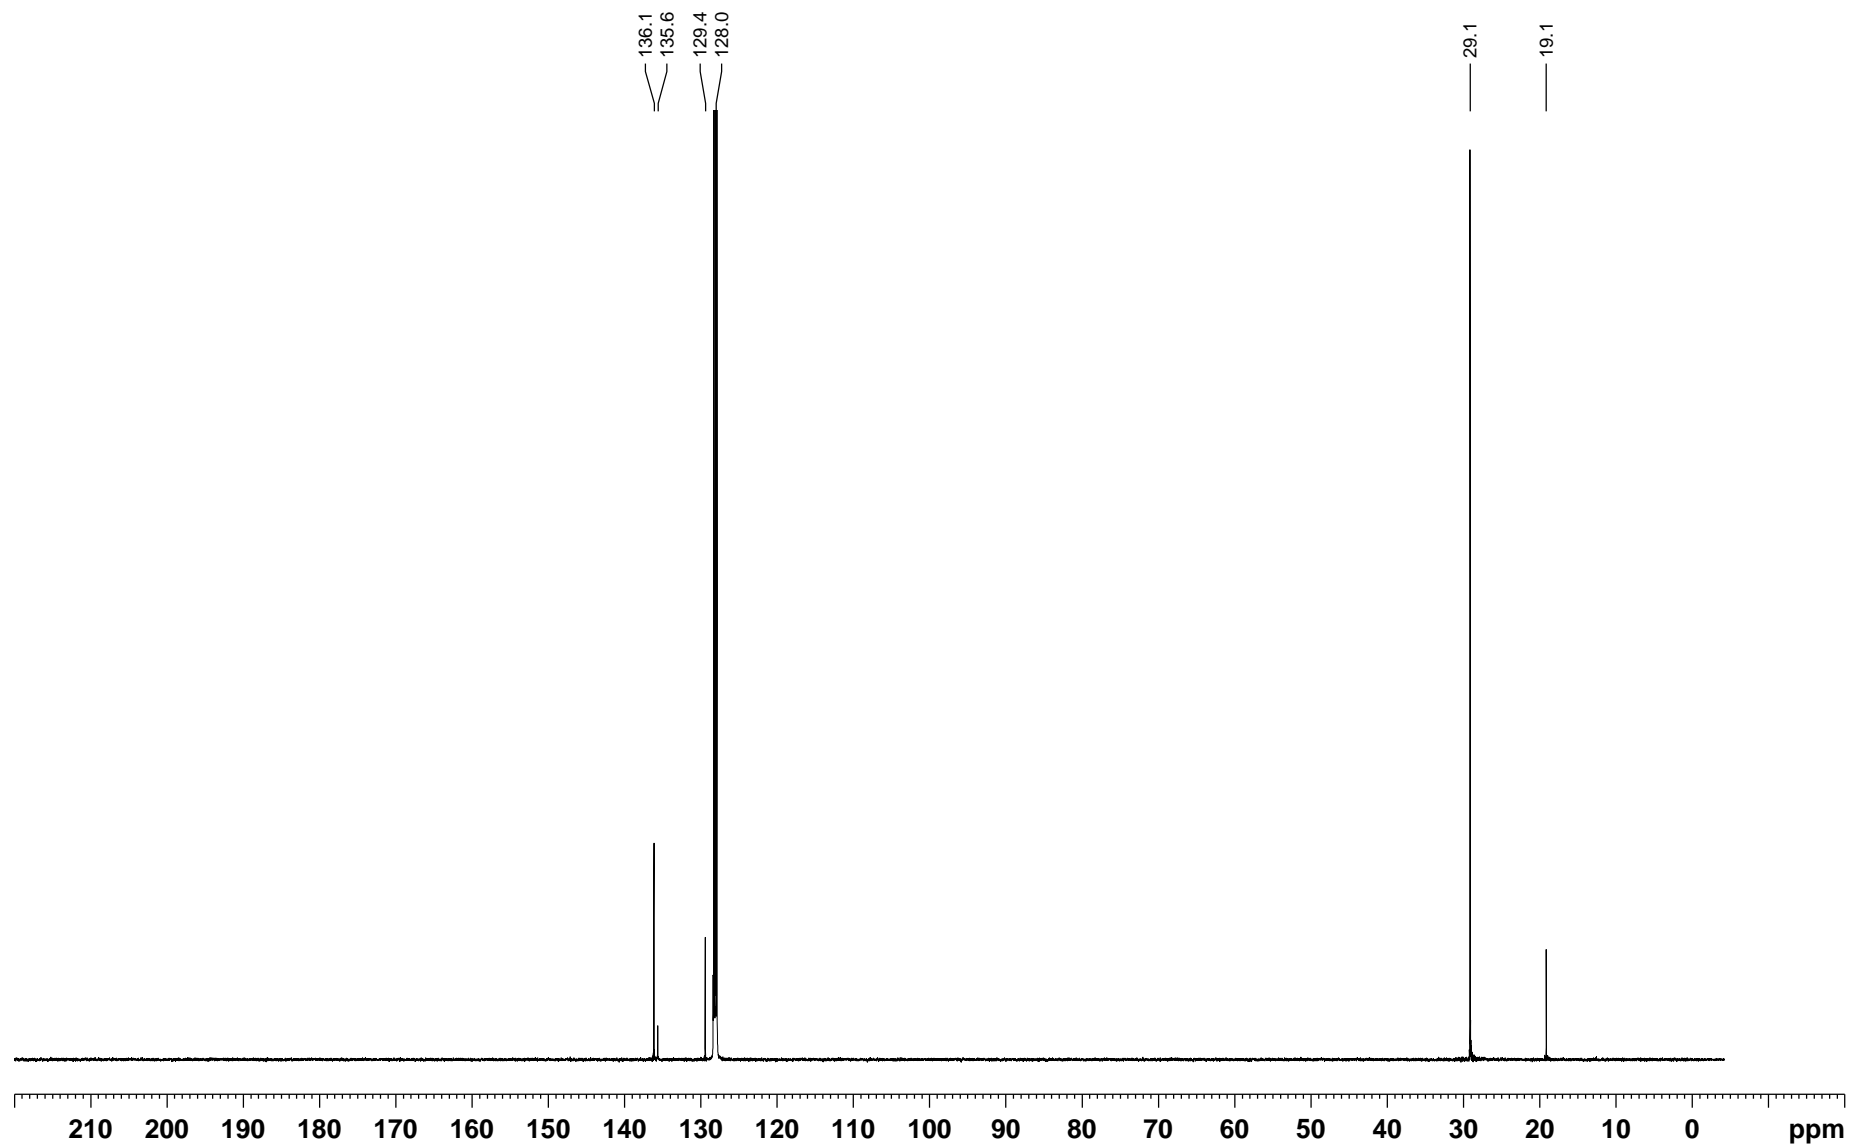



**Figure S12.**  $^{29}\text{Si}$  DEPT NMR spectrum (99 MHz,  $\text{C}_6\text{D}_6$ , 300 K, optimized for  $J = 200$  Hz) of  $t\text{Bu}_2\text{PhSiH}$ .

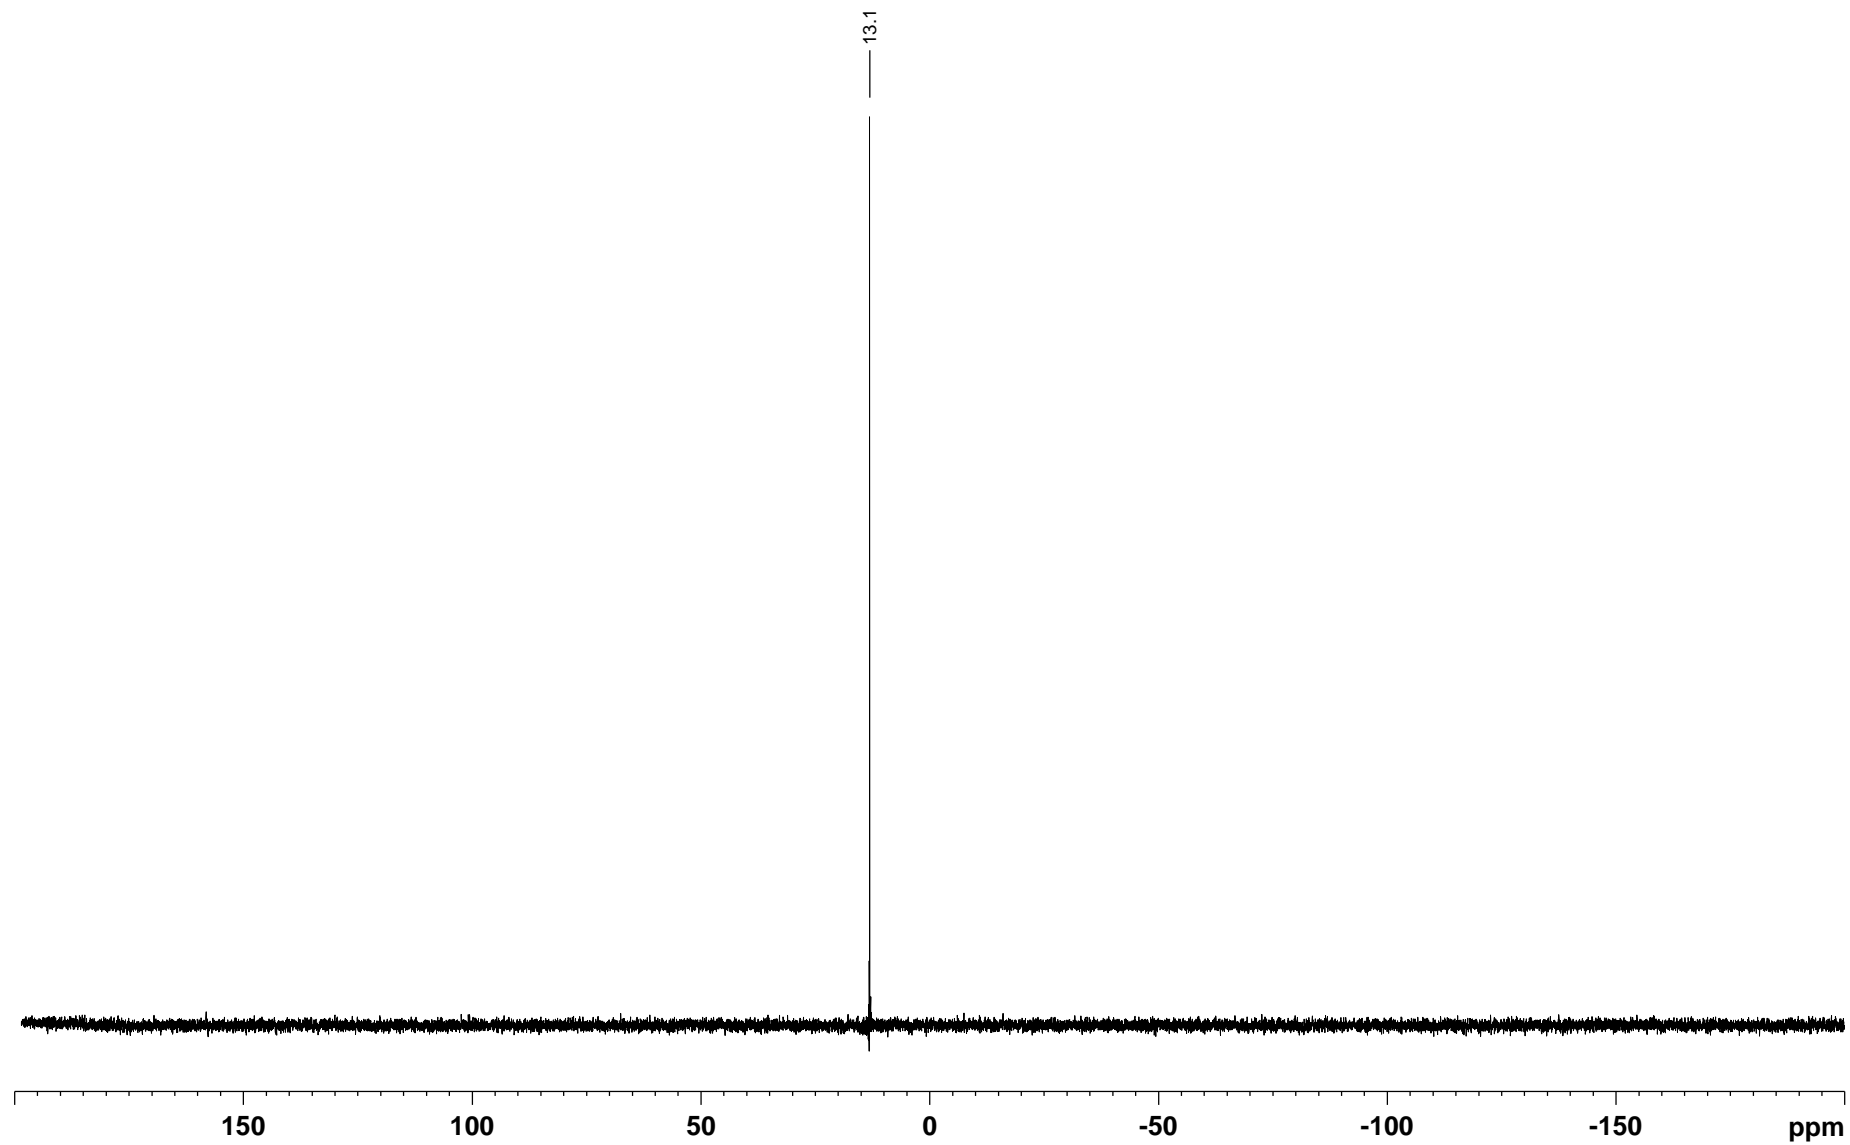

**Figure S13.**  $^1\text{H}$  NMR spectrum (500 MHz,  $\text{CD}_2\text{Cl}_2$ , 300 K) of  $\text{Ph}_3\text{C}^+[\text{CHB}_{11}\text{H}_5\text{Br}_6]$  (\* = toluene).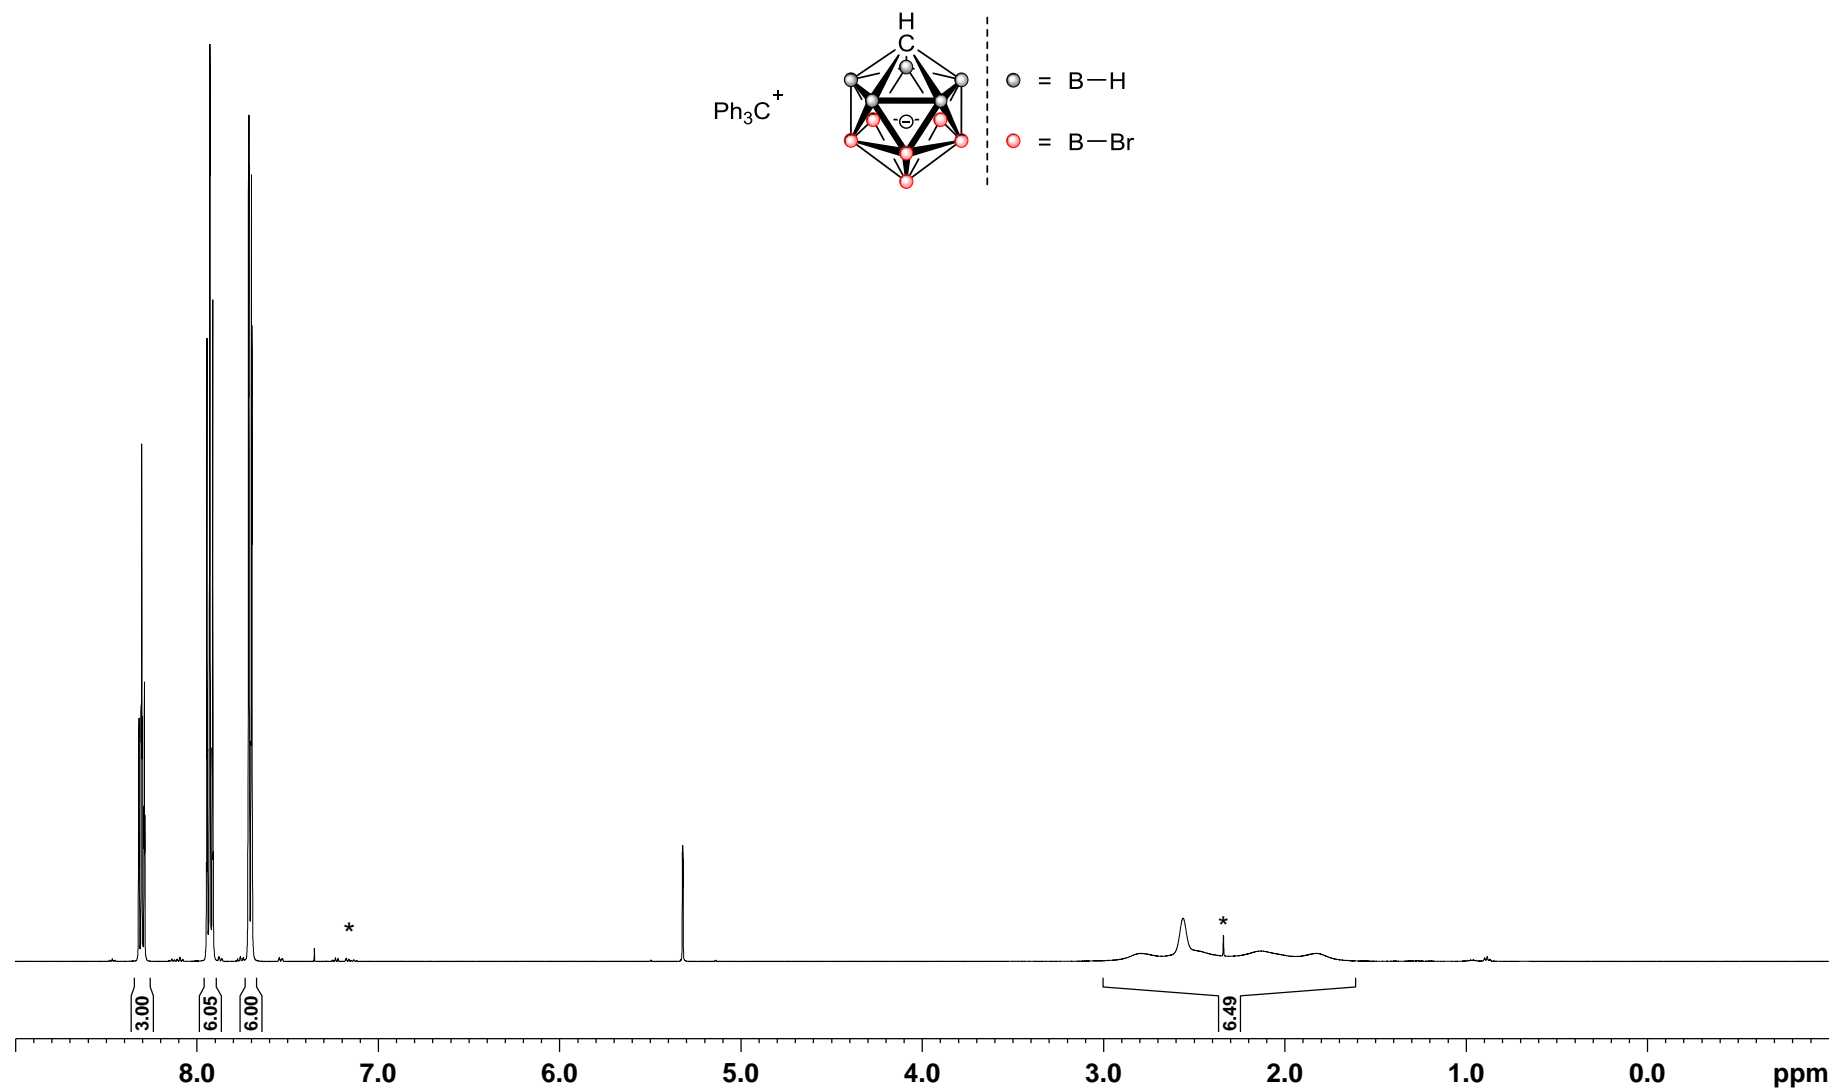

**Figure S14.**  $^{11}\text{B}$  NMR spectrum (161 MHz,  $\text{CD}_2\text{Cl}_2$ , 300 K) of  $\text{Ph}_3\text{C}^+[\text{CHB}_{11}\text{H}_5\text{Br}_6]^-$ .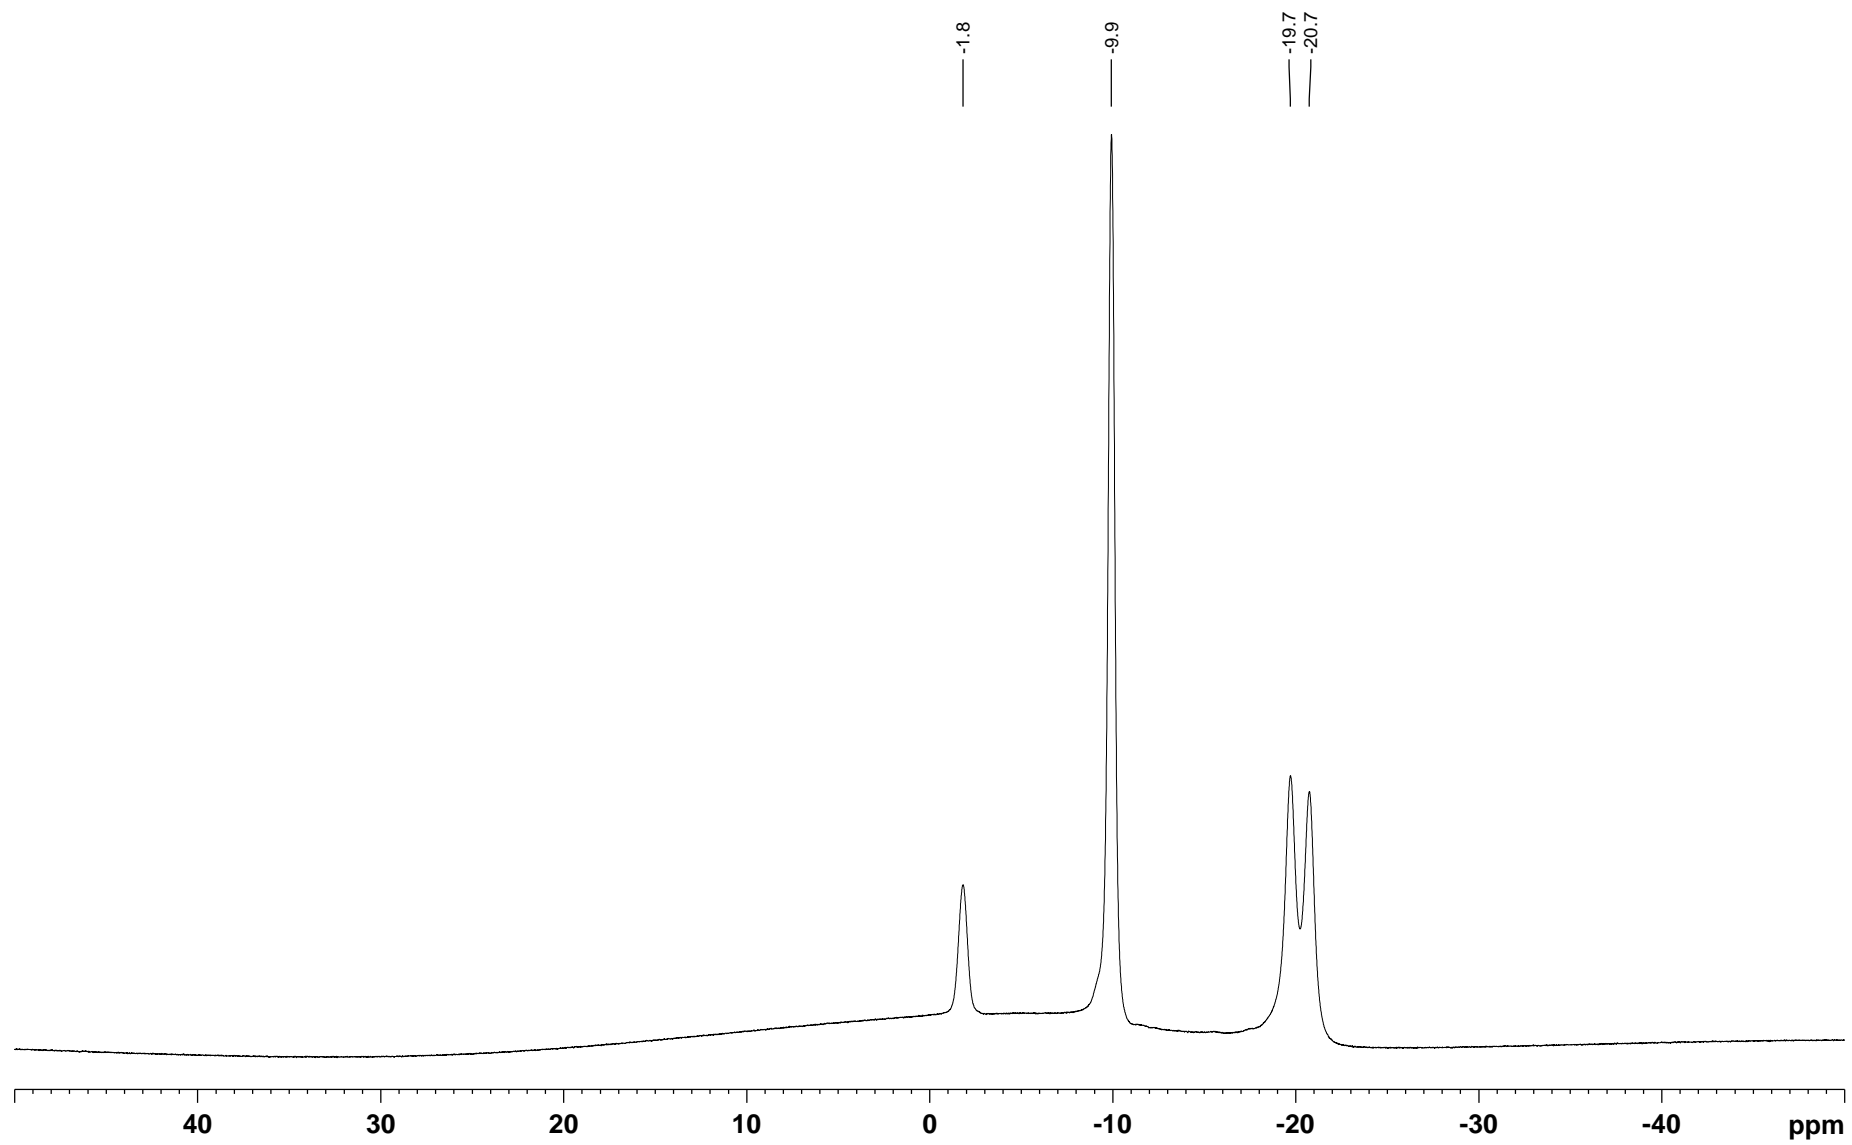

**Figure S15.**  $^{13}\text{C}\{^1\text{H}\}$  NMR spectrum (126 MHz,  $\text{CD}_2\text{Cl}_2$ , 300 K) of  $\text{Ph}_3\text{C}^+[\text{CHB}_{11}\text{H}_5\text{Br}_6]^-$ .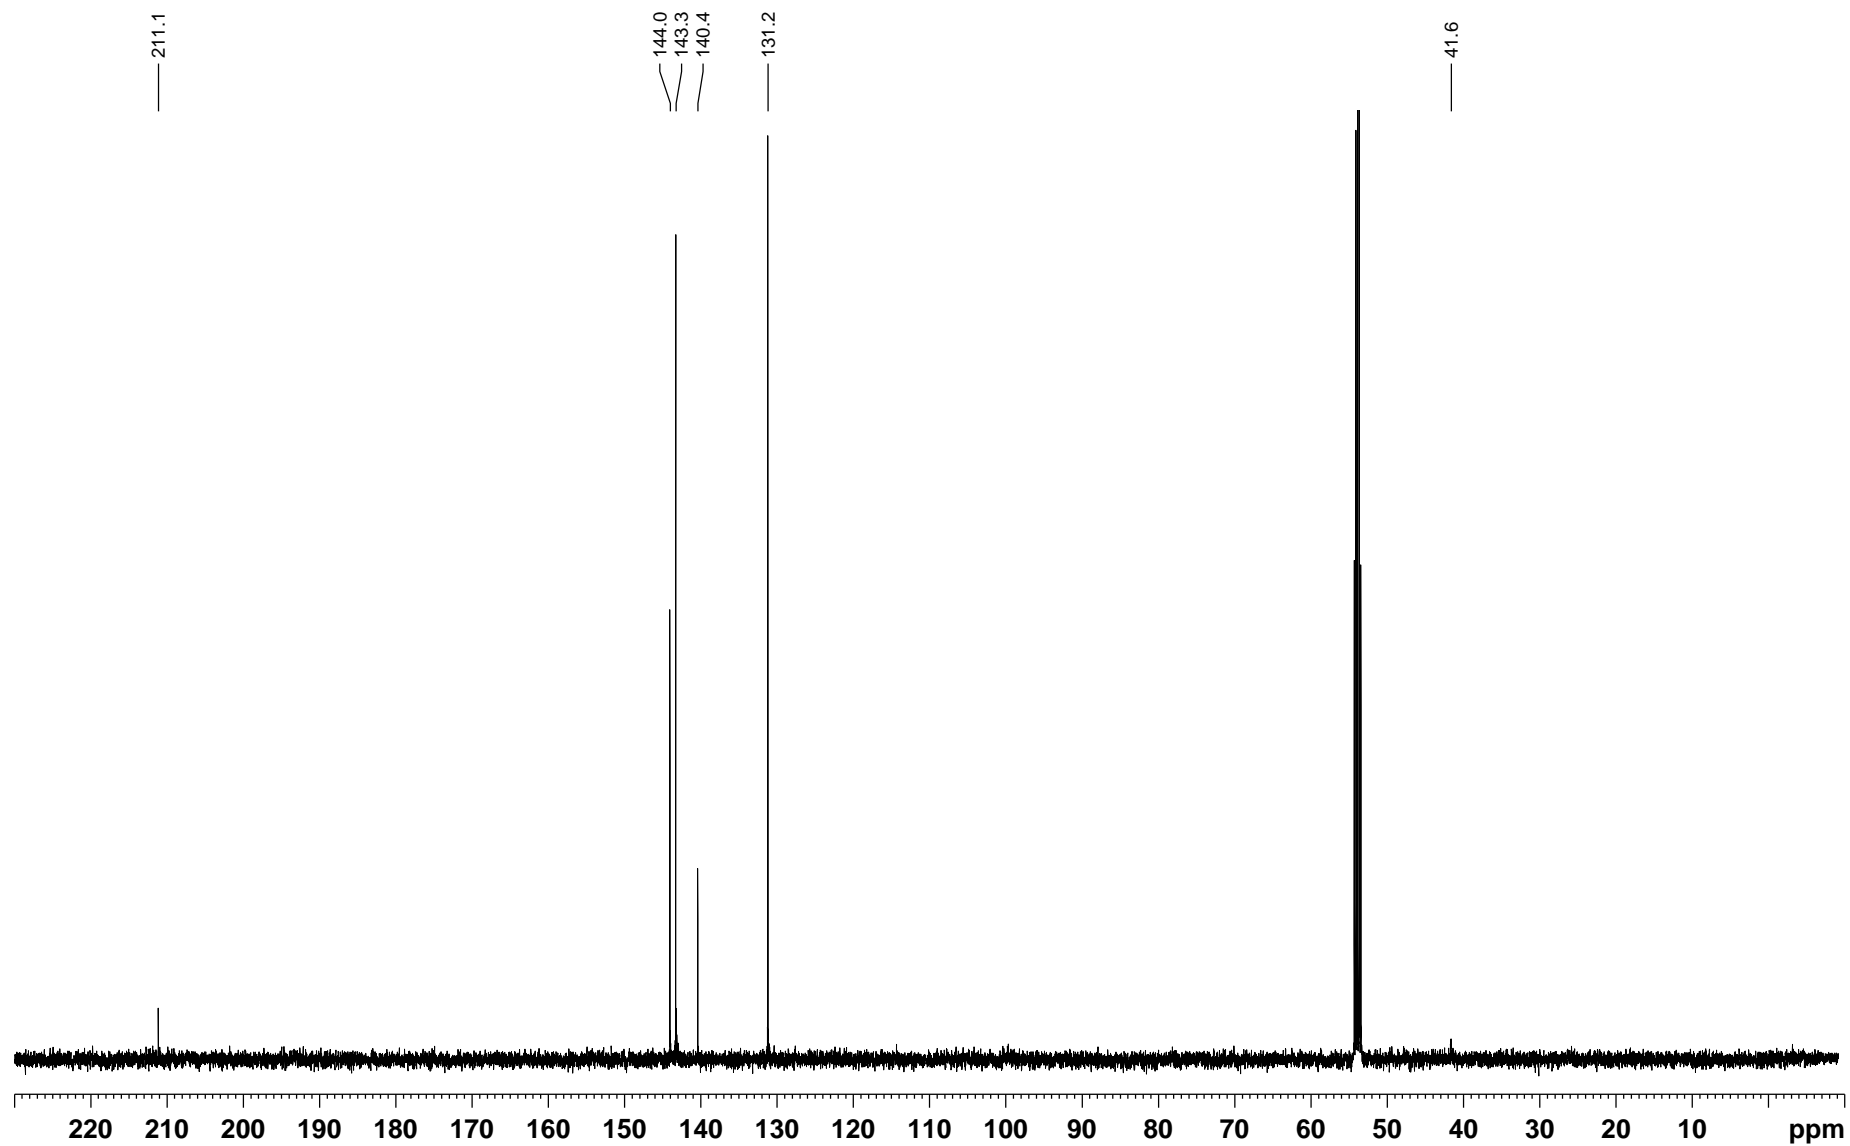

**Figure S16.**  $^1\text{H}$  NMR spectrum (500 MHz,  $o\text{-Cl}_2\text{C}_6\text{D}_4$ , 298 K) of  $(\text{C}_6\text{Me}_5)_3\text{Si}^+[\text{B}(\text{C}_6\text{F}_5)_4]^-$  from the reaction of  $\text{Me}(\text{C}_6\text{Me}_5)_2\text{SiH}$  with  $\text{Ph}_3\text{C}^+[\text{B}(\text{C}_6\text{F}_5)_4]^-$ .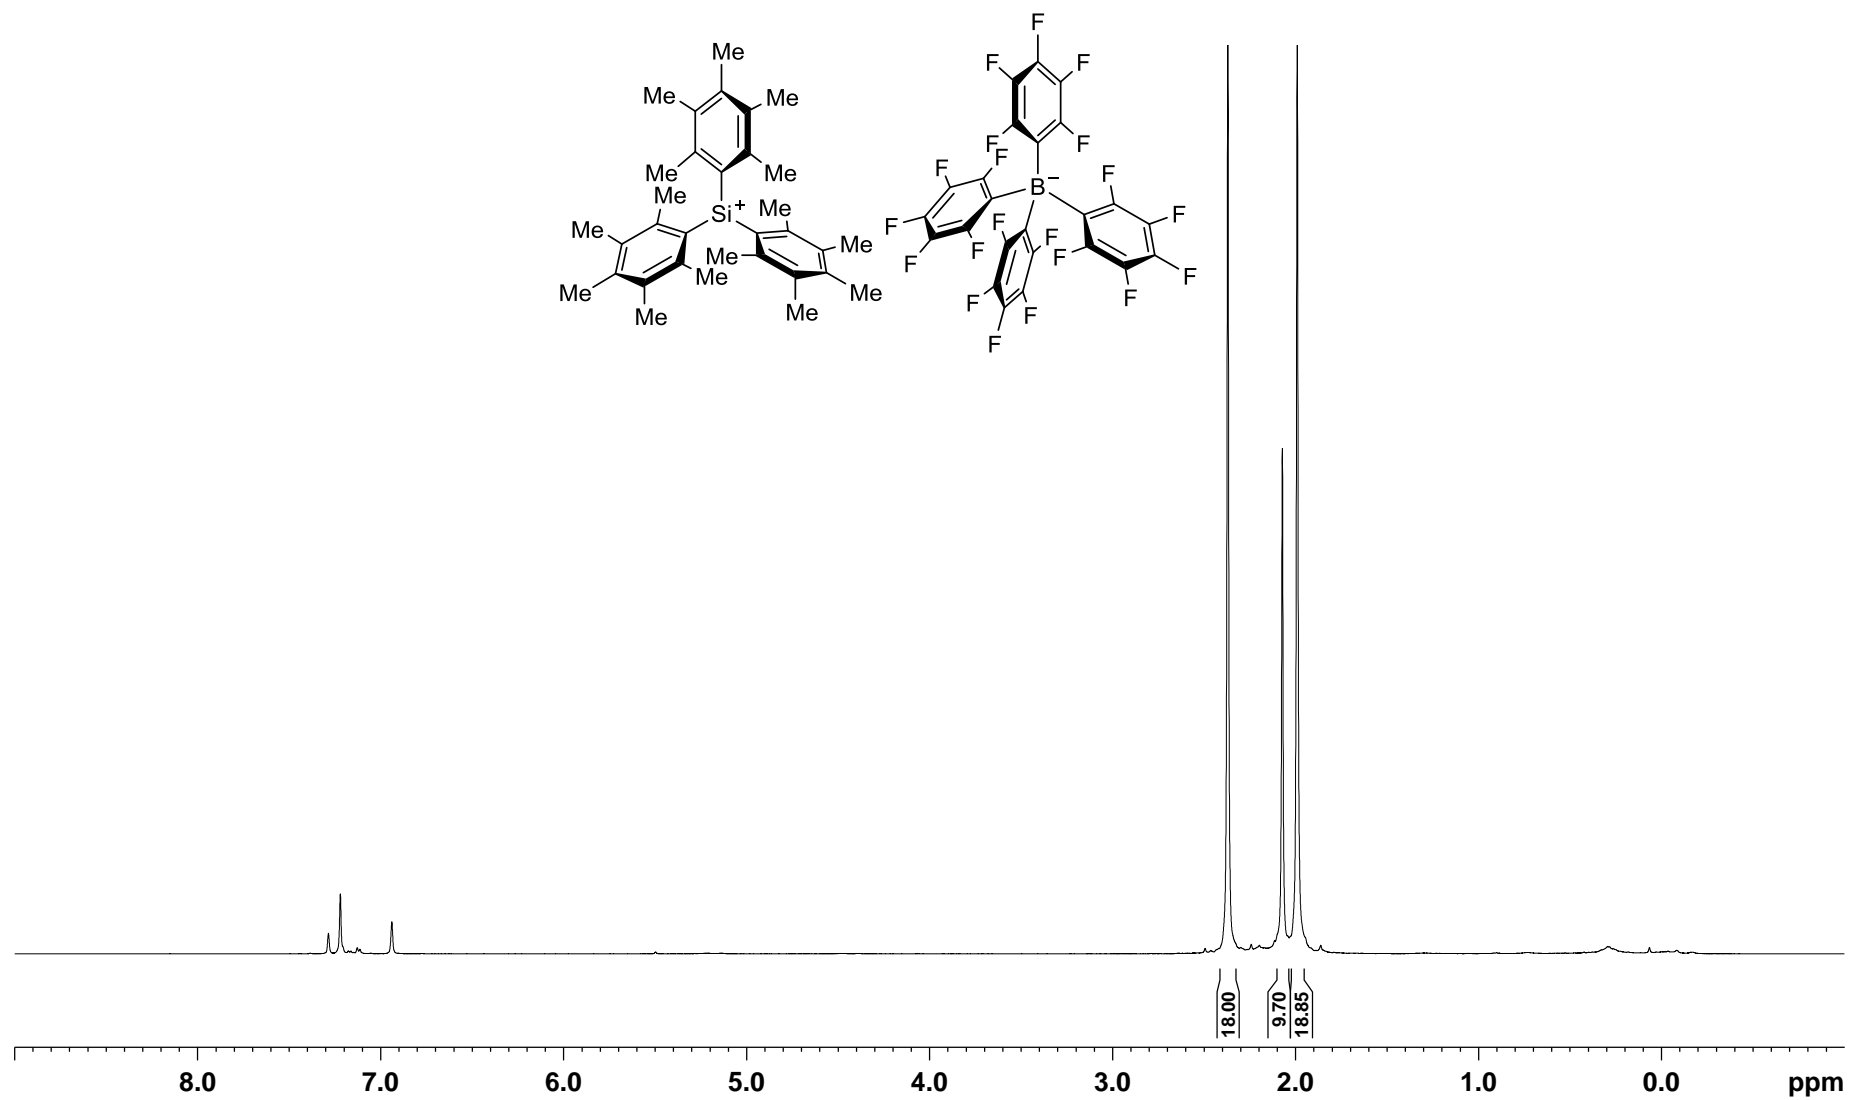

**Figure S17.**  $^{11}\text{B}\{^1\text{H}\}$  NMR spectrum (161 MHz,  $o\text{-Cl}_2\text{C}_6\text{D}_4$ , 298 K) of  $(\text{C}_6\text{Me}_5)_3\text{Si}^+[\text{B}(\text{C}_6\text{F}_5)_4]^-$  from the reaction of  $\text{Me}(\text{C}_6\text{Me}_5)_2\text{SiH}$  with  $\text{Ph}_3\text{C}^+[\text{B}(\text{C}_6\text{F}_5)_4]^-$ .

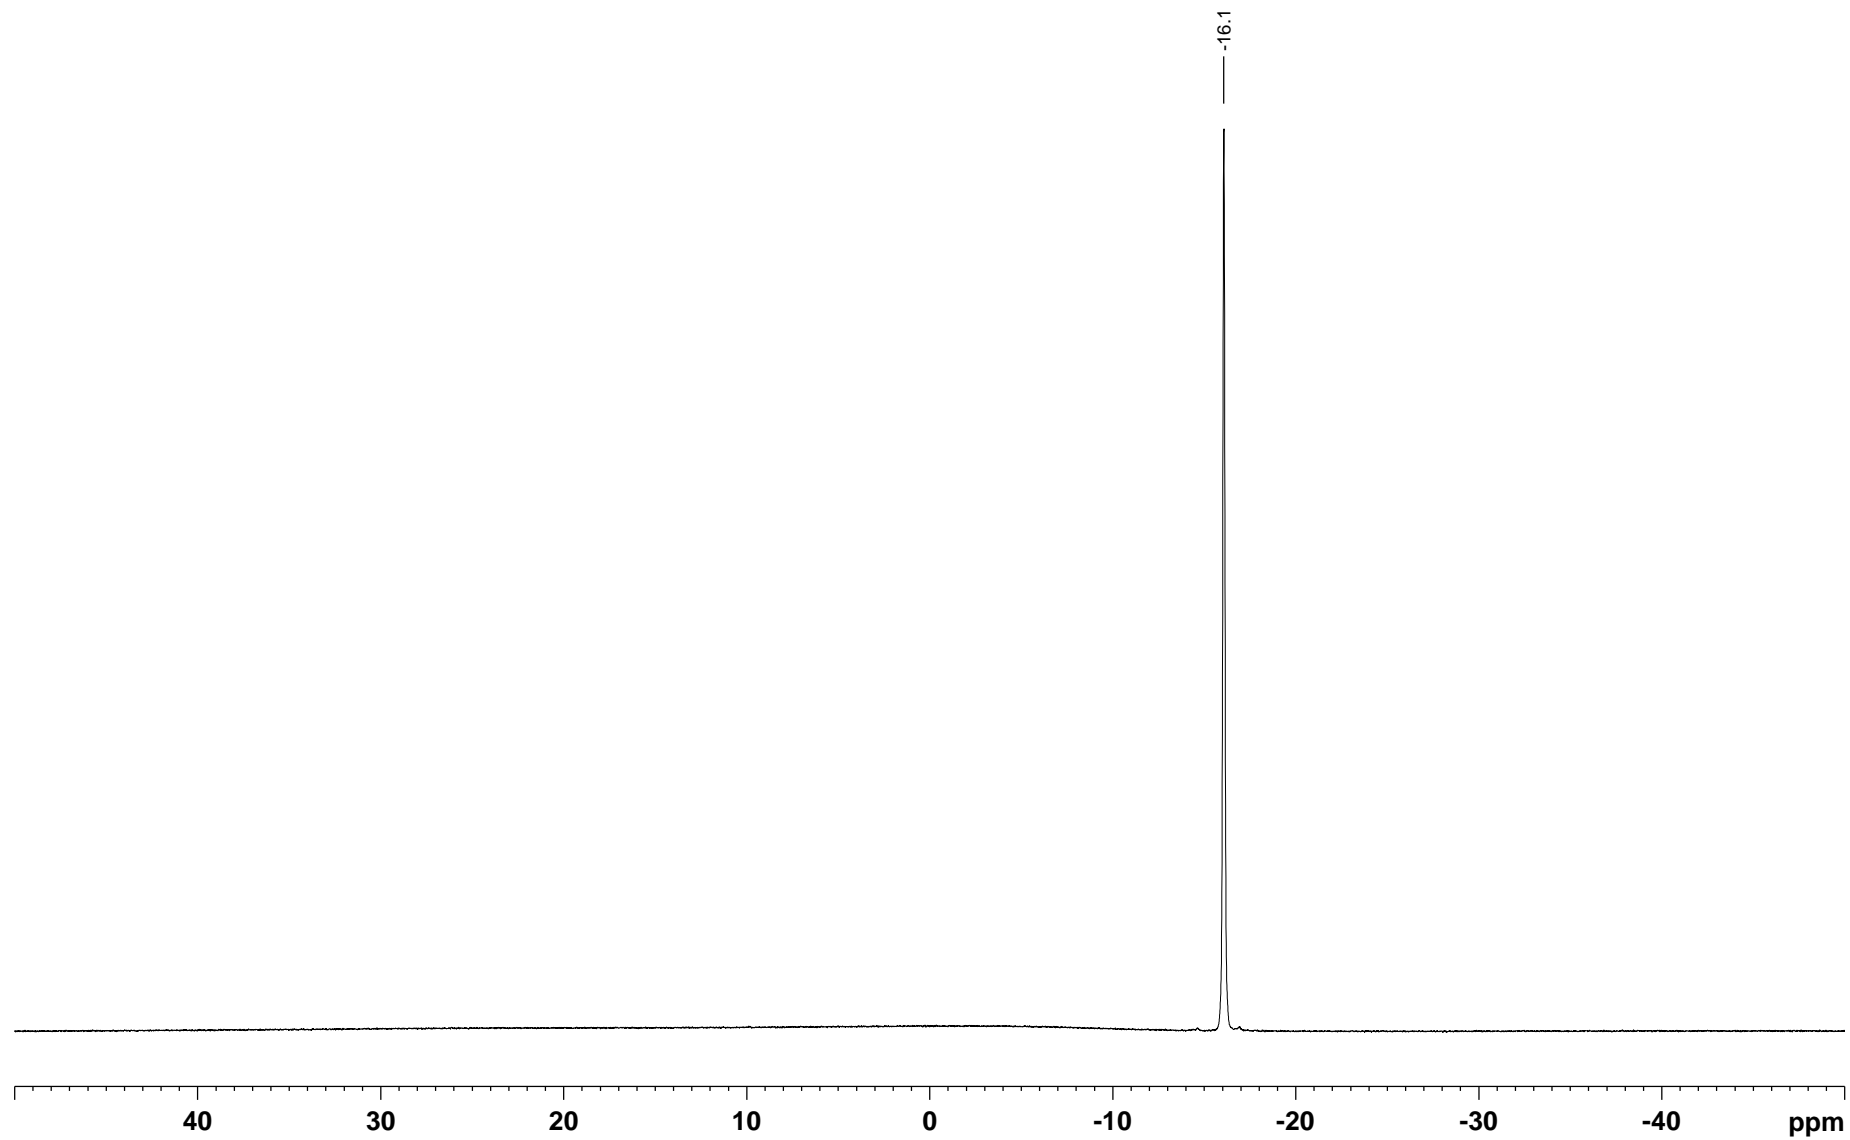

**Figure S18.**  $^{13}\text{C}\{^1\text{H}\}$  NMR spectrum (126 MHz,  $o\text{-Cl}_2\text{C}_6\text{D}_4$ , 298 K) of  $(\text{C}_6\text{Me}_5)_3\text{Si}^+[\text{B}(\text{C}_6\text{F}_5)_4]^-$  from the reaction of  $\text{Me}(\text{C}_6\text{Me}_5)_2\text{SiH}$  with  $\text{Ph}_3\text{C}^+[\text{B}(\text{C}_6\text{F}_5)_4]^-$ .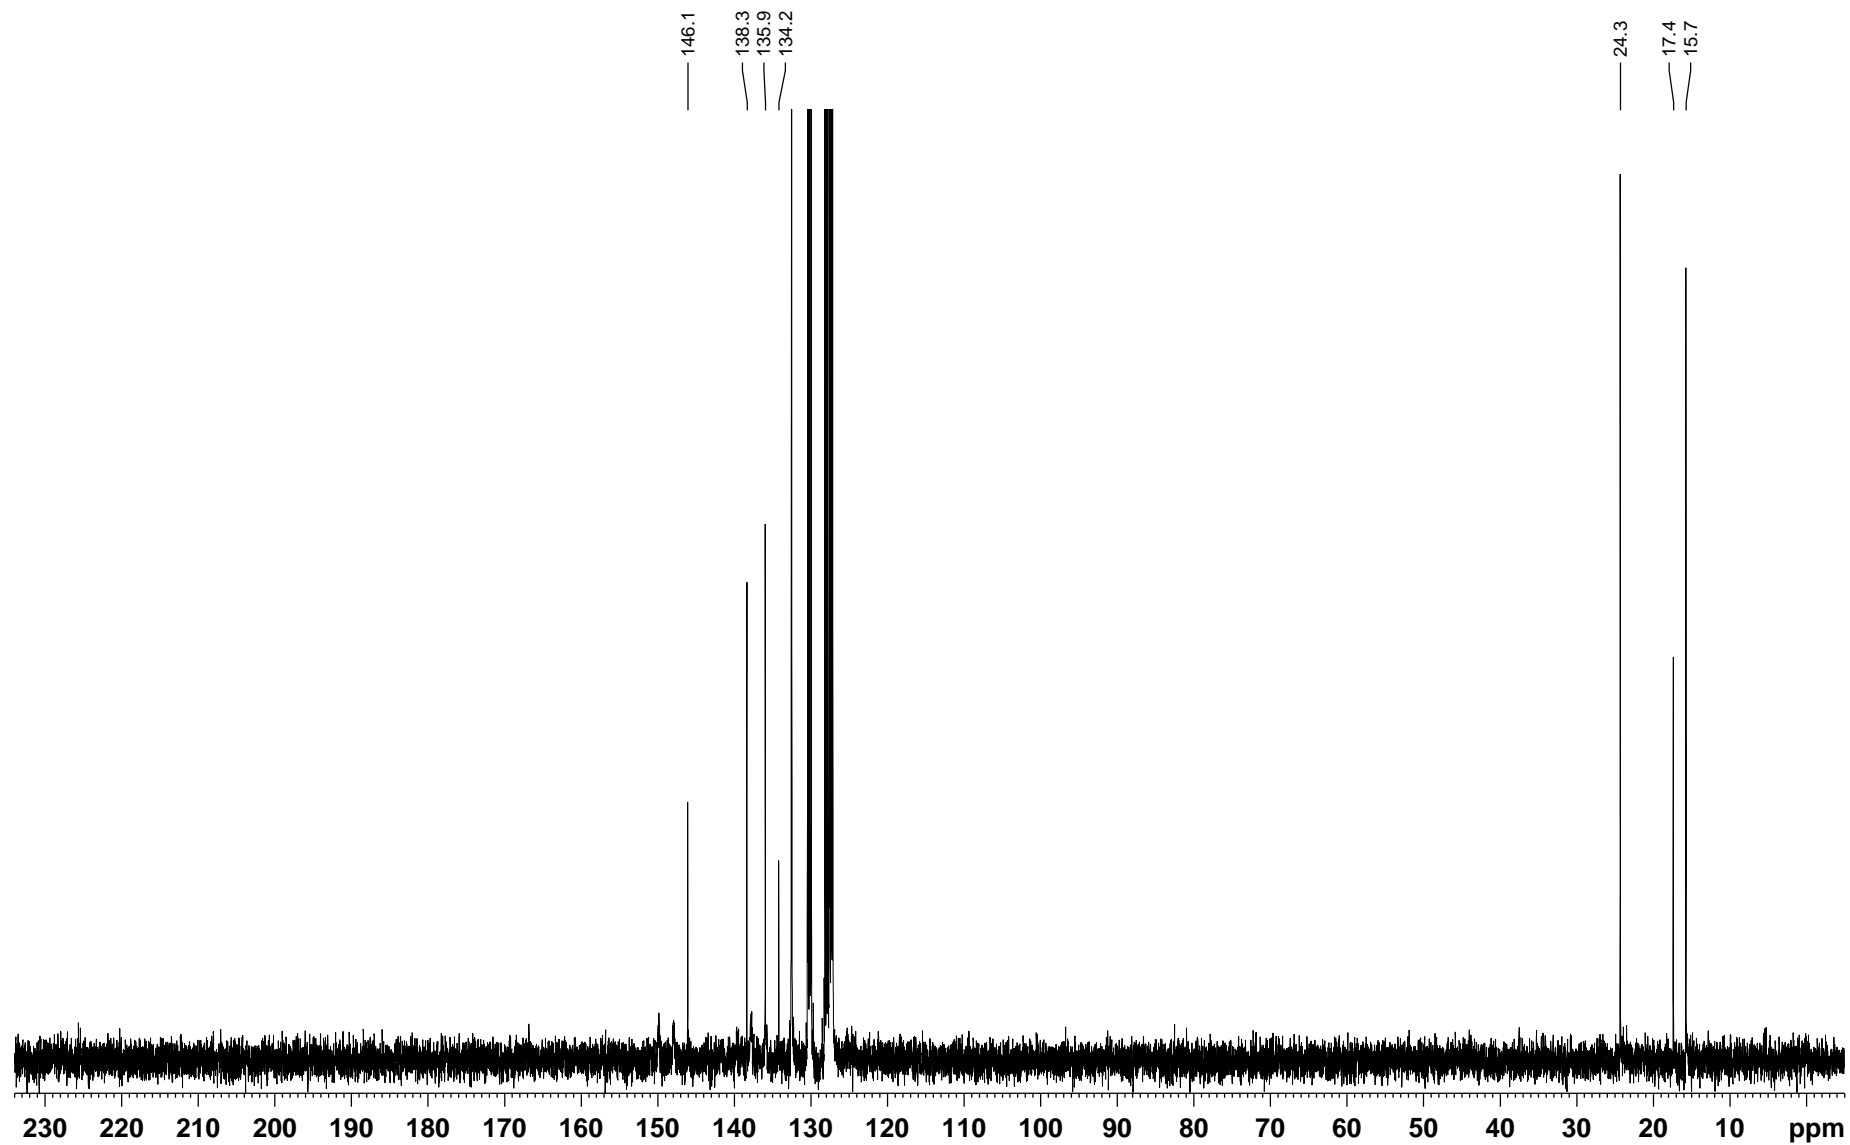

**Figure S19.**  $^{19}\text{F}$  NMR spectrum (471 MHz,  $o\text{-Cl}_2\text{C}_6\text{D}_4$ , 298 K) of  $(\text{C}_6\text{Me}_5)_3\text{Si}^+[\text{B}(\text{C}_6\text{F}_5)_4]^-$  from the reaction of  $\text{Me}(\text{C}_6\text{Me}_5)_2\text{SiH}$  with  $\text{Ph}_3\text{C}^+[\text{B}(\text{C}_6\text{F}_5)_4]^-$ .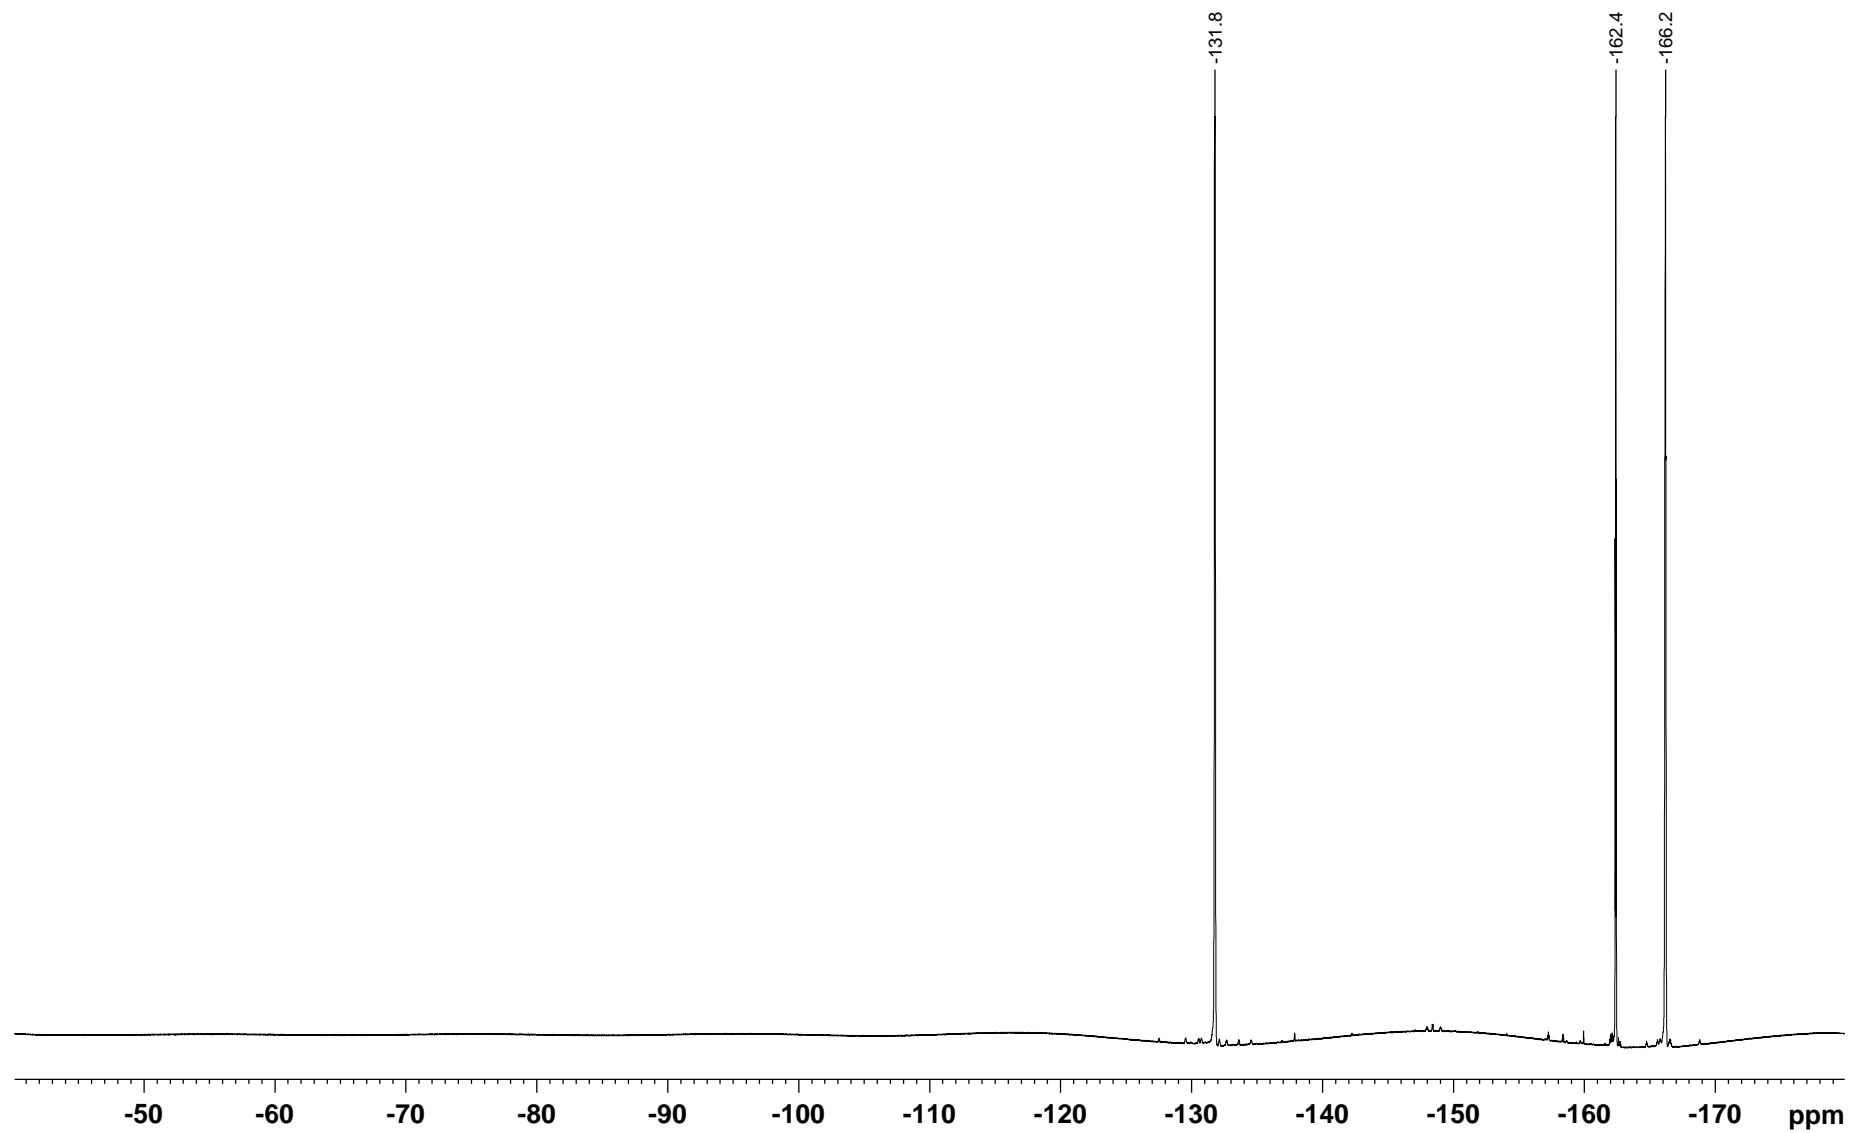



**Figure S20.**  $^1\text{H}/^{29}\text{Si}$  HMQC NMR spectrum (500/99 MHz,  $o\text{-Cl}_2\text{C}_6\text{D}_4$ , 298 K, optimized for  $J = 3$  Hz) of  $(\text{C}_6\text{Me}_5)_3\text{Si}^+[\text{B}(\text{C}_6\text{F}_5)_4]^-$  from the reaction of  $\text{Me}(\text{C}_6\text{Me}_5)_2\text{SiH}$  with  $\text{Ph}_3\text{C}^+[\text{B}(\text{C}_6\text{F}_5)_4]^-$ .

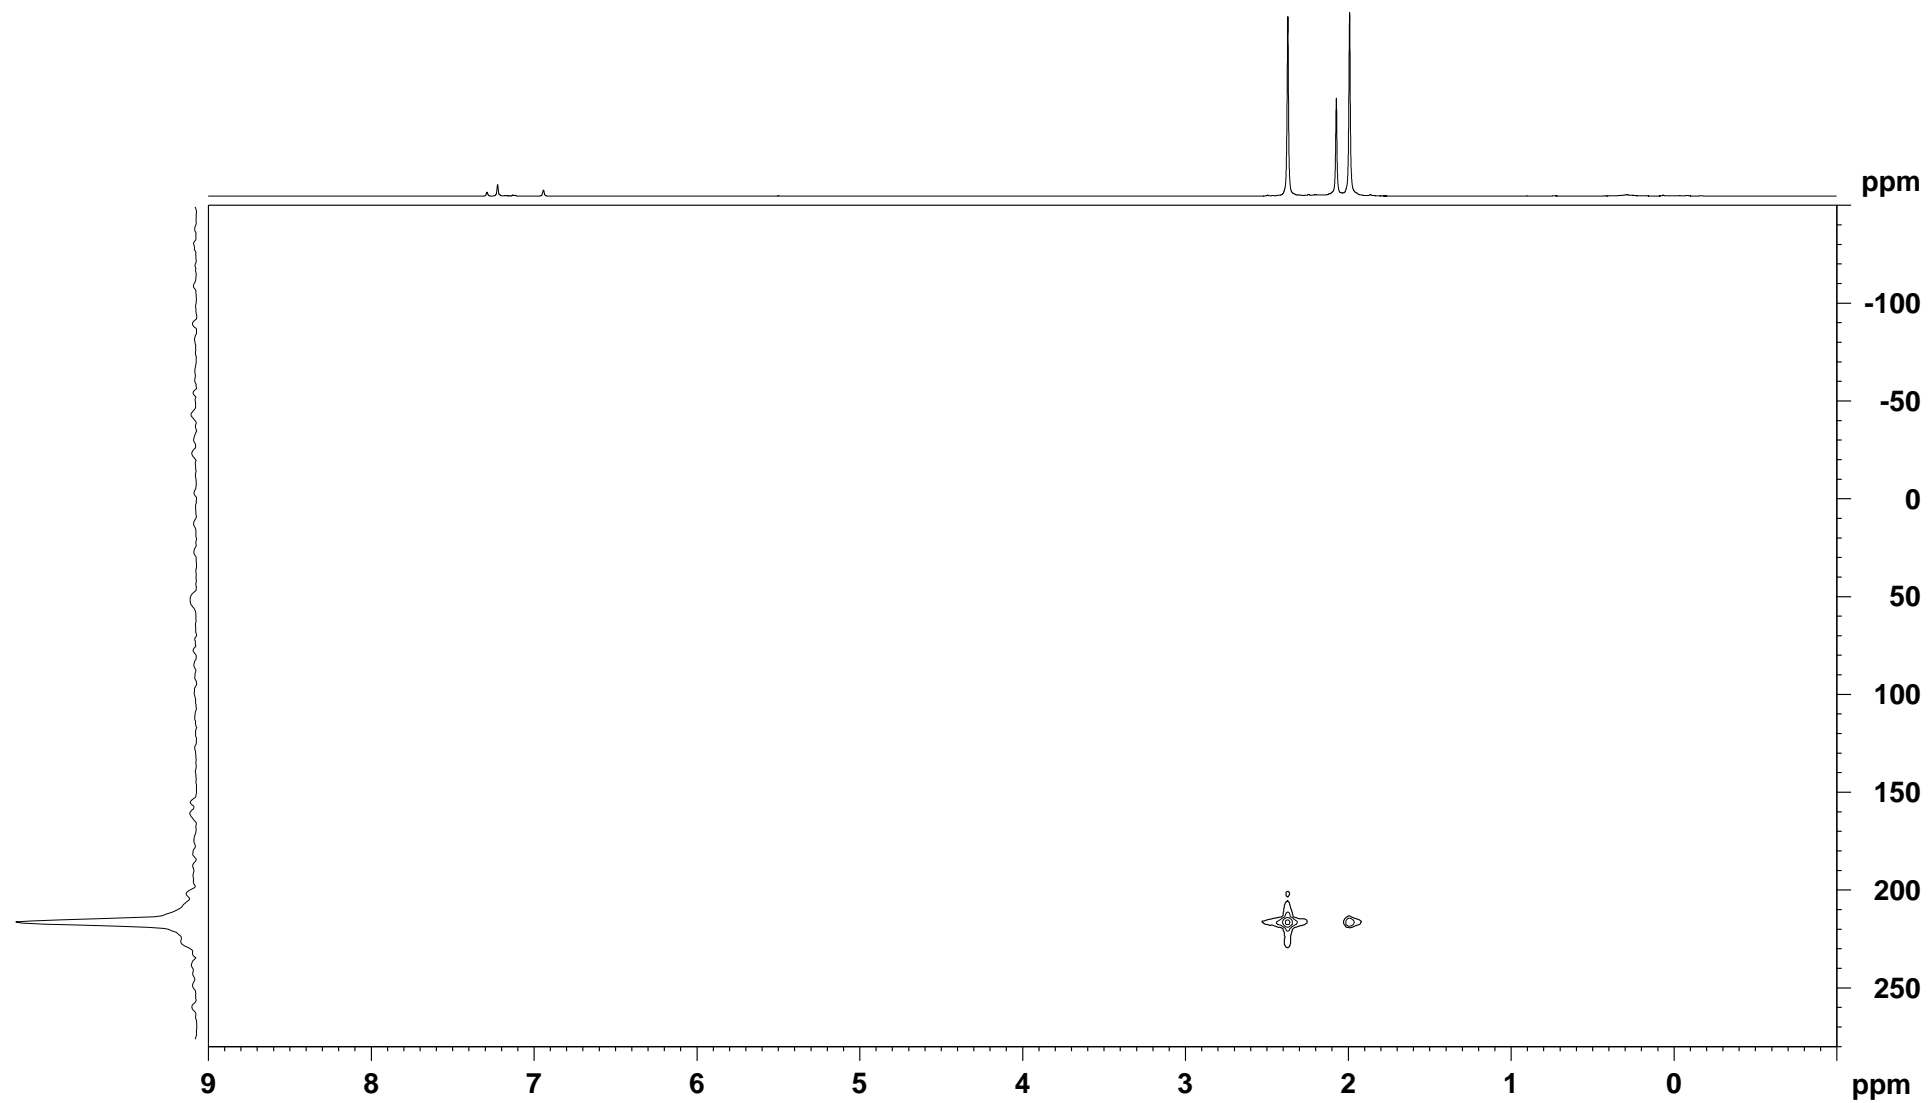

**Figure S21.**  $^1\text{H}$  NMR spectrum (700 MHz,  $\text{o-Cl}_2\text{C}_6\text{D}_4$ , 298 K) of  $(\text{C}_6\text{Me}_5)_3\text{Si}^+[\text{CHB}_{11}\text{H}_5\text{Br}_6]^-$  from the reaction of  $\text{Me}(\text{C}_6\text{Me}_5)_2\text{SiH}$  with  $\text{Ph}_3\text{C}^+[\text{CHB}_{11}\text{H}_5\text{Br}_6]^-$  (\* = toluene).

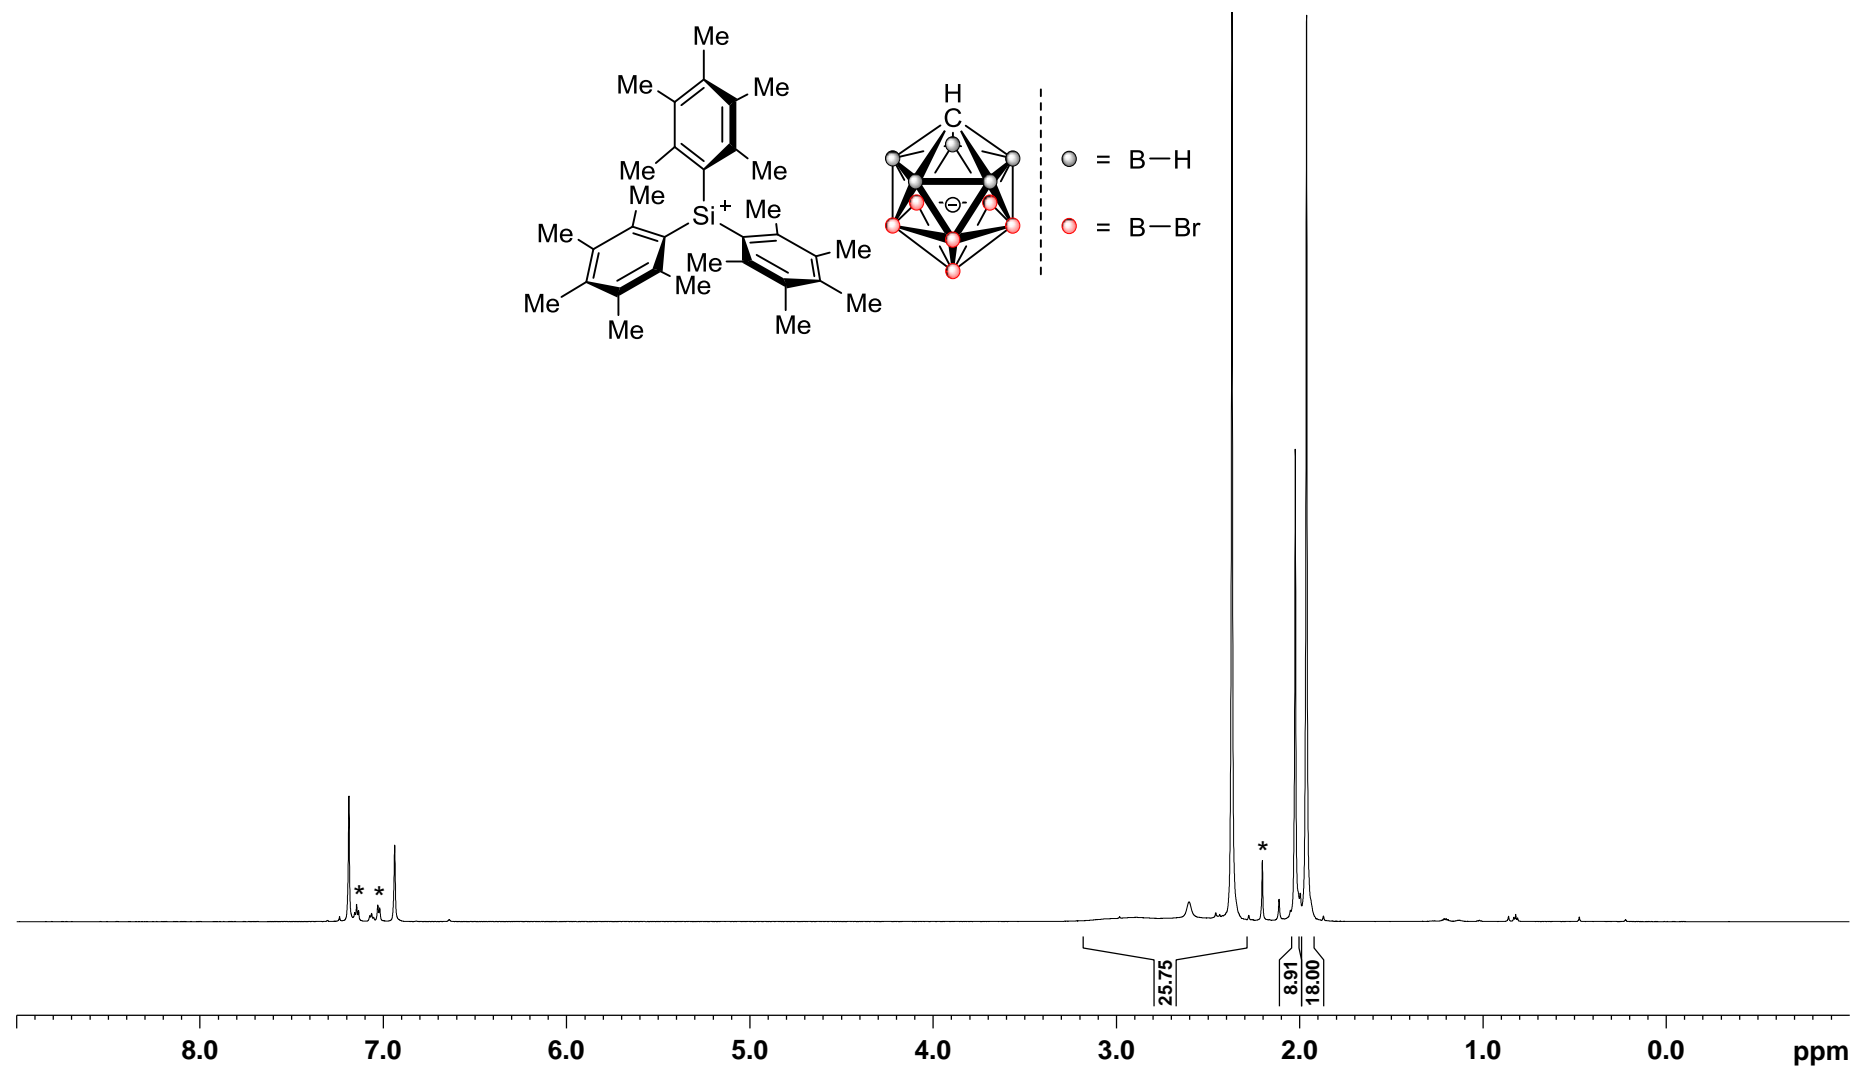

**Figure S22.**  $^{11}\text{B}$  NMR spectrum (224 MHz,  $o\text{-Cl}_2\text{C}_6\text{D}_4$ , 298 K) of  $(\text{C}_6\text{Me}_5)_3\text{Si}^+[\text{CHB}_{11}\text{H}_5\text{Br}_6]^-$  from the reaction of  $\text{Me}(\text{C}_6\text{Me}_5)_2\text{SiH}$  with  $\text{Ph}_3\text{C}^+[\text{CHB}_{11}\text{H}_5\text{Br}_6]^-$ .

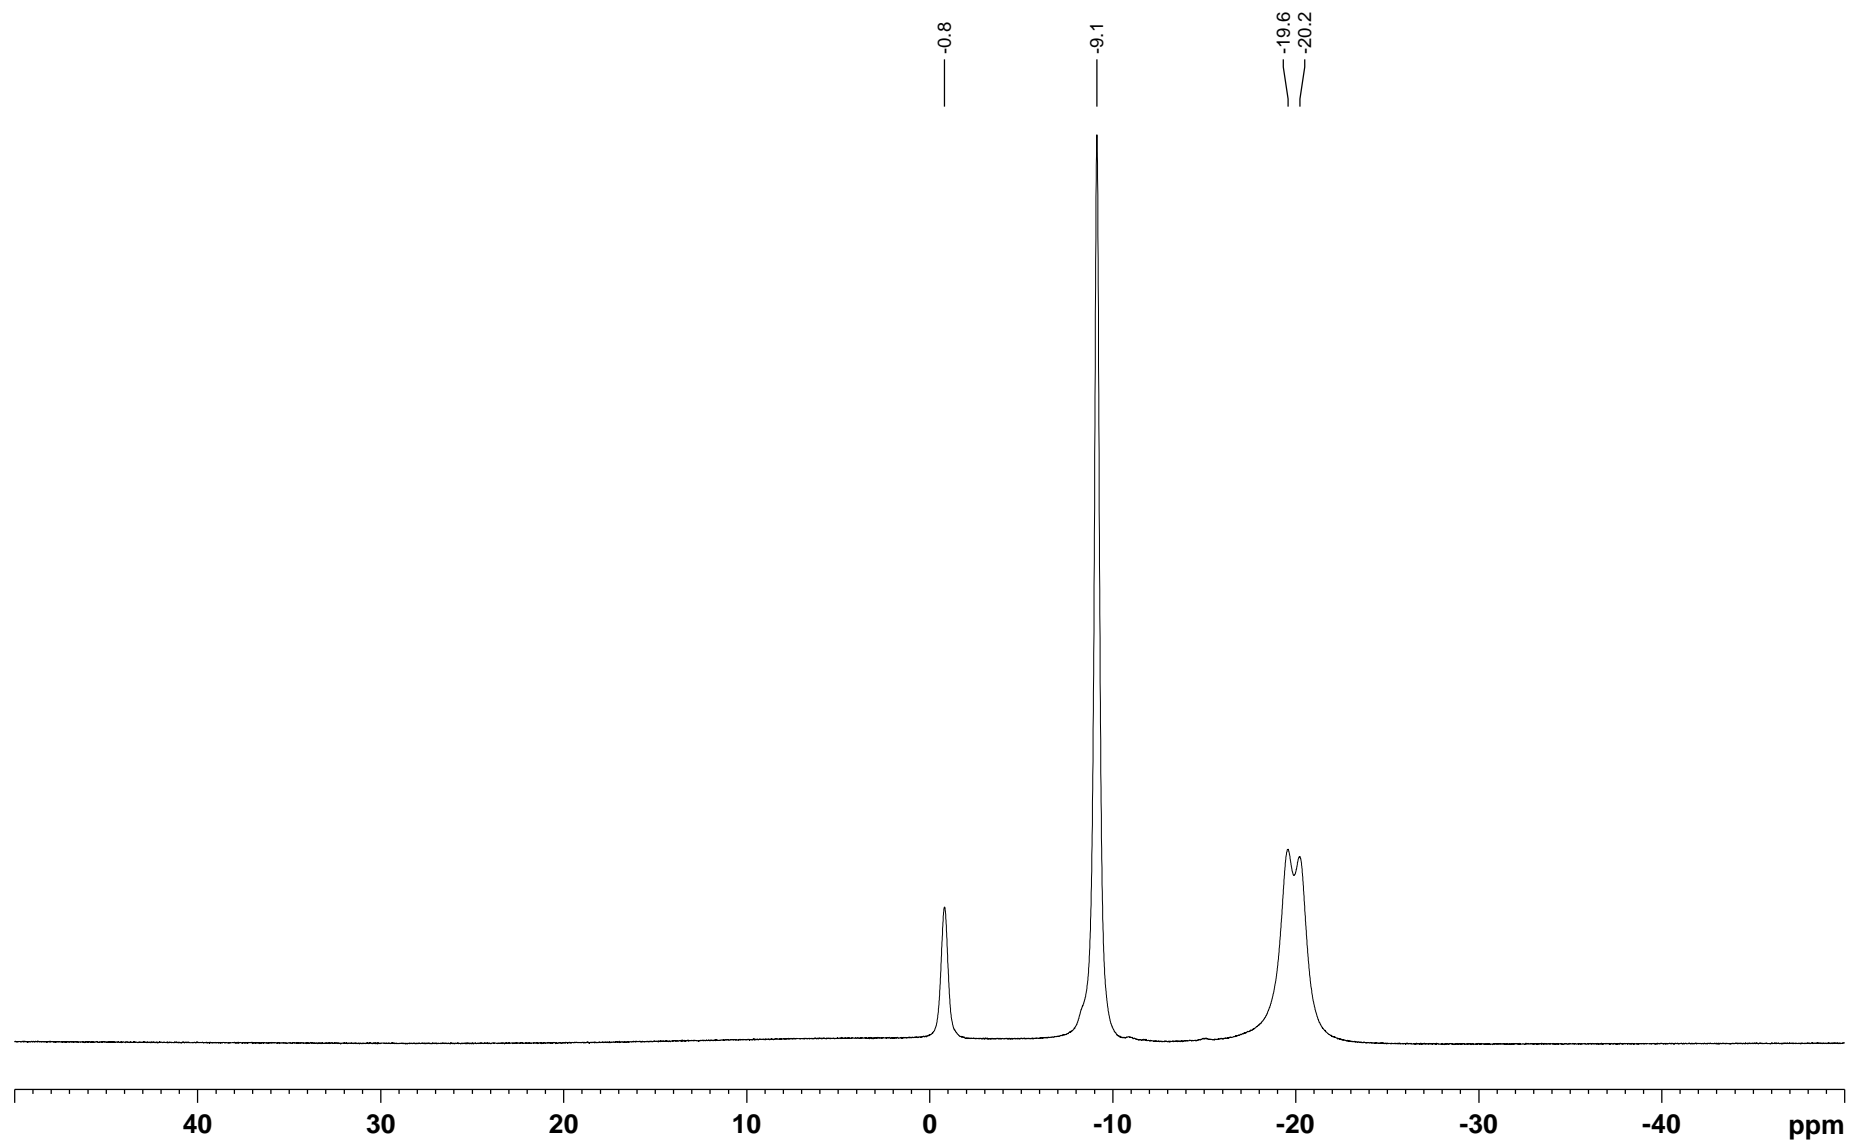

**Figure S23.**  $^{13}\text{C}\{^1\text{H}\}$  NMR spectrum (175 MHz,  $o\text{-Cl}_2\text{C}_6\text{D}_4$ , 298 K) of  $(\text{C}_6\text{Me}_5)_3\text{Si}^+[\text{CHB}_{11}\text{H}_5\text{Br}_6]^-$  from the reaction of  $\text{Me}(\text{C}_6\text{Me}_5)_2\text{SiH}$  with  $\text{Ph}_3\text{C}^+[\text{CHB}_{11}\text{H}_5\text{Br}_6]^-$  (\* = toluene).

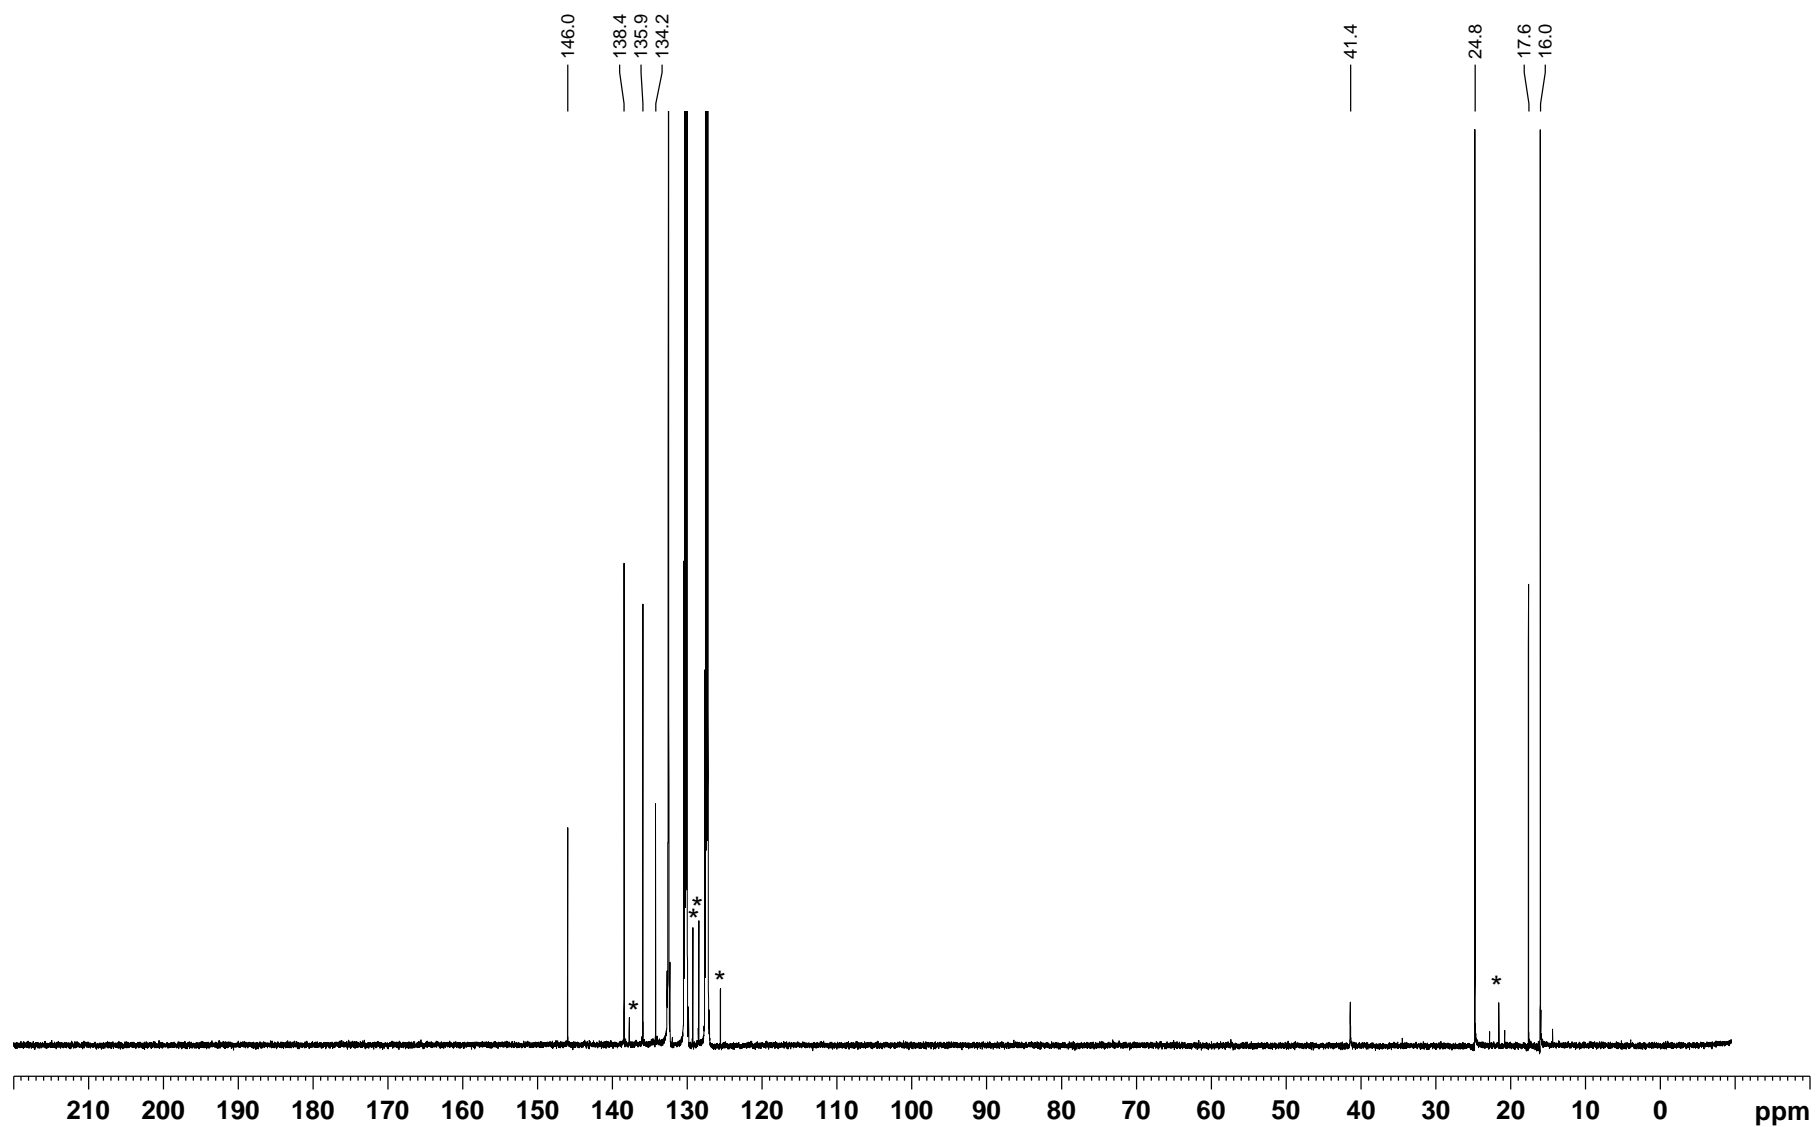

**Figure S24.**  $^1\text{H}/^{29}\text{Si}$  HMQC NMR spectrum (700/139 MHz,  $o\text{-Cl}_2\text{C}_6\text{D}_4$ , 298 K, optimized for  $J = 3$  Hz) of  $(\text{C}_6\text{Me}_5)_3\text{Si}^+[\text{CHB}_{11}\text{H}_5\text{Br}_6]^-$  from the reaction of  $\text{Me}(\text{C}_6\text{Me}_5)_2\text{SiH}$  with  $\text{Ph}_3\text{C}^+[\text{CHB}_{11}\text{H}_5\text{Br}_6]^-$ .

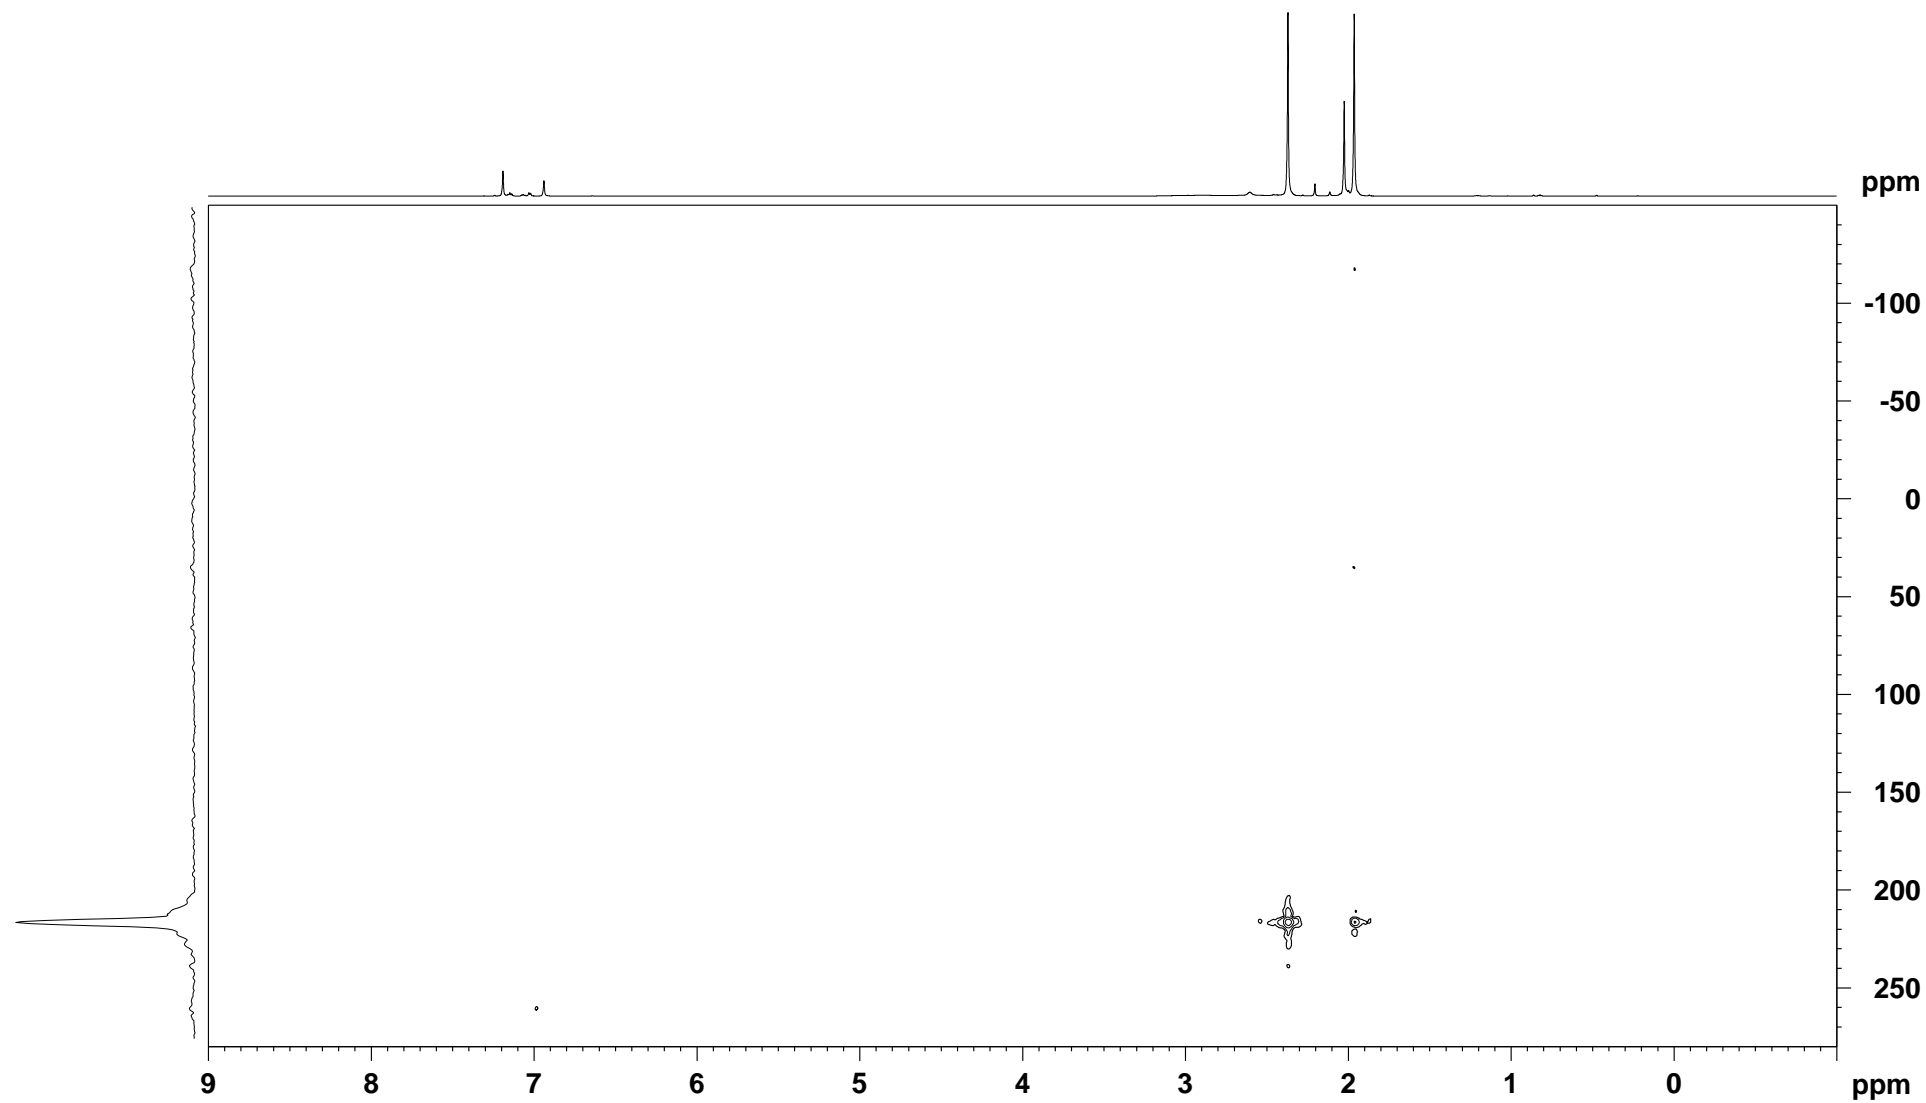

**Figure S25.**  $^{19}\text{F}$  NMR spectra (659 MHz,  $o\text{-Cl}_2\text{C}_6\text{D}_4$ , 298 K) from the reactions of  $\text{MePh}_2\text{SiH}$  with  $\text{Ph}_3\text{C}^+[\text{B}(\text{C}_6\text{F}_5)_4]^-$  (top) and  $\text{Me}_2\text{PhSiH}$  with  $\text{Ph}_3\text{C}^+[\text{B}(\text{C}_6\text{F}_5)_4]^-$  (middle) as well as a clean sample of  $\text{B}(\text{C}_6\text{F}_5)_3$  (bottom;  $\$ = [\text{B}(\text{C}_6\text{F}_5)_4]^-$ ).

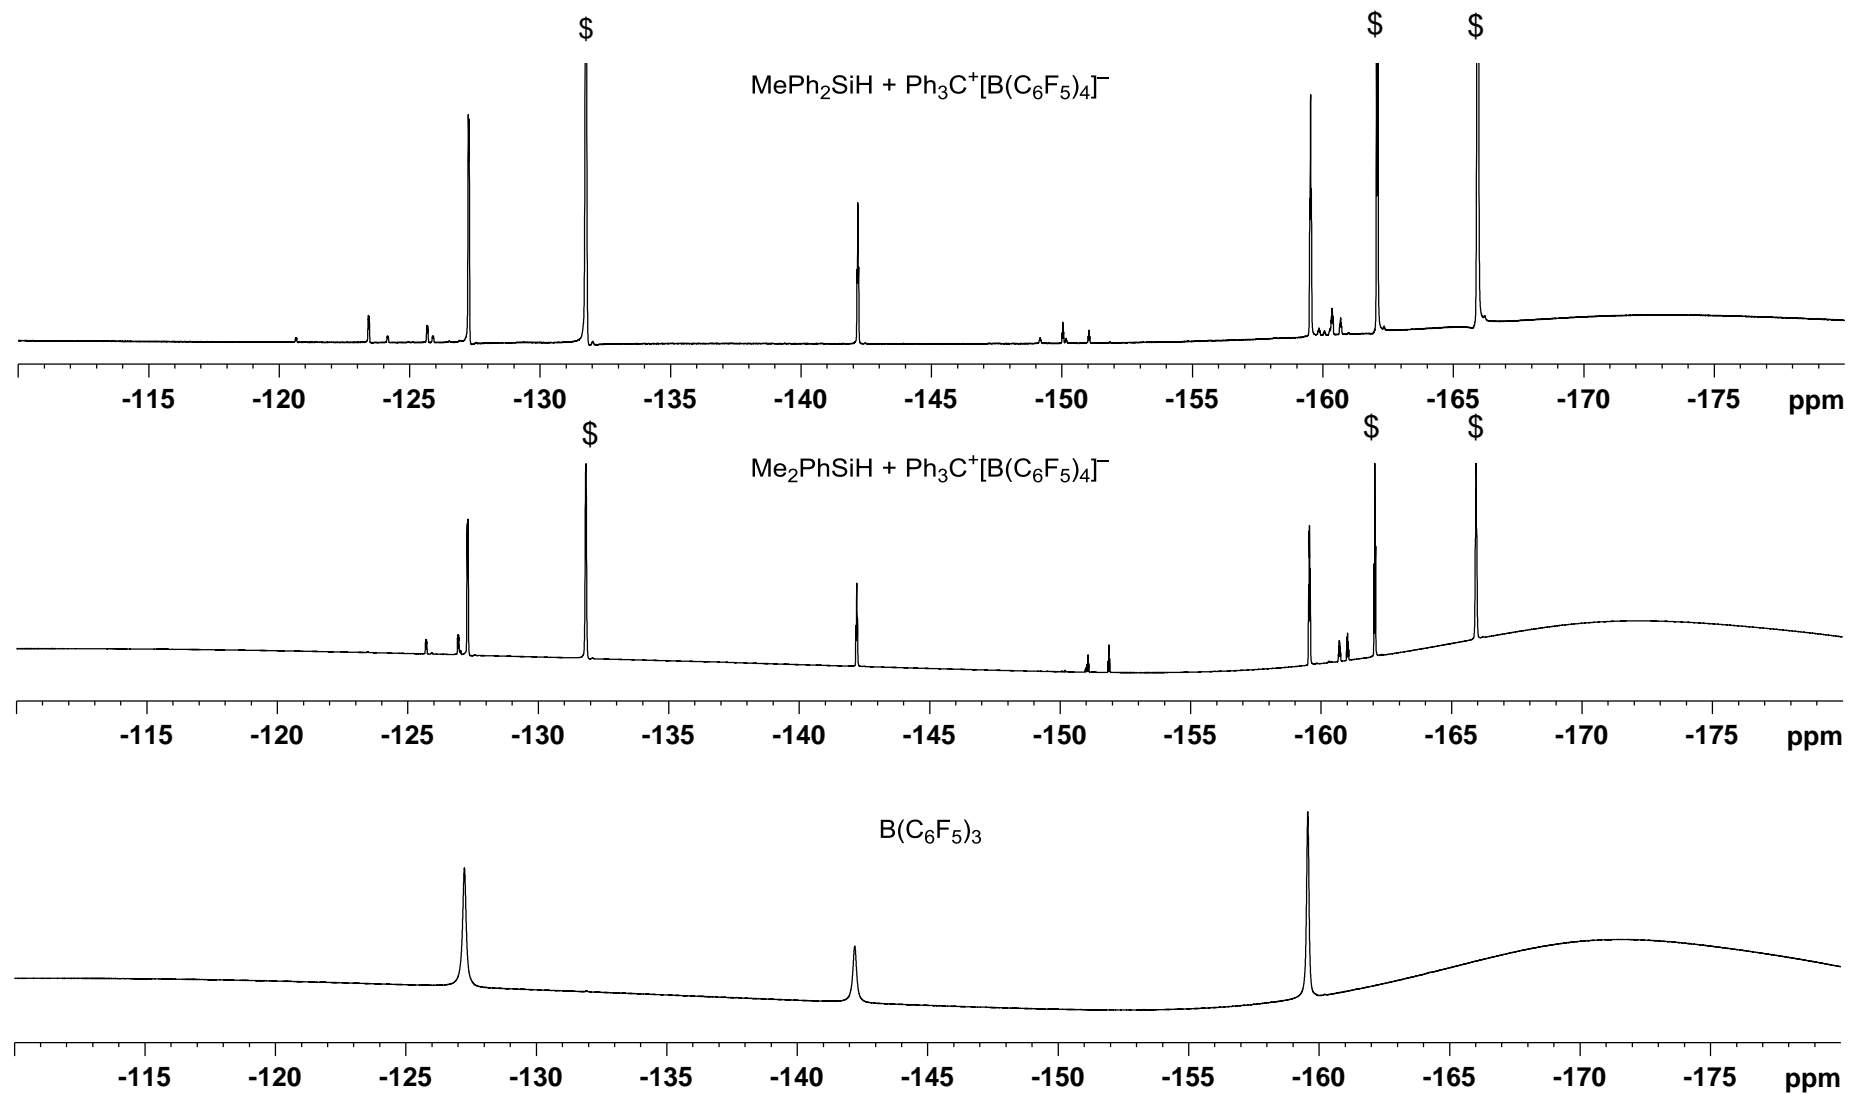

**Figure S26.**  $^1\text{H}$  NMR spectrum (500 MHz,  $\text{o-Cl}_2\text{C}_6\text{D}_4$ , 300 K) of  $\text{MePh}_2\text{Si}^+[\text{CHB}_{11}\text{H}_5\text{Br}_6]^-$  from the reaction of  $\text{MePh}_2\text{SiH}$  with  $\text{Ph}_3\text{C}^+[\text{CHB}_{11}\text{H}_5\text{Br}_6]^-$  (+ = *n*-pentane, \* = toluene, # =  $\text{Me}_2\text{PhSi}^+[\text{CHB}_{11}\text{H}_5\text{Br}_6]^-$ ).

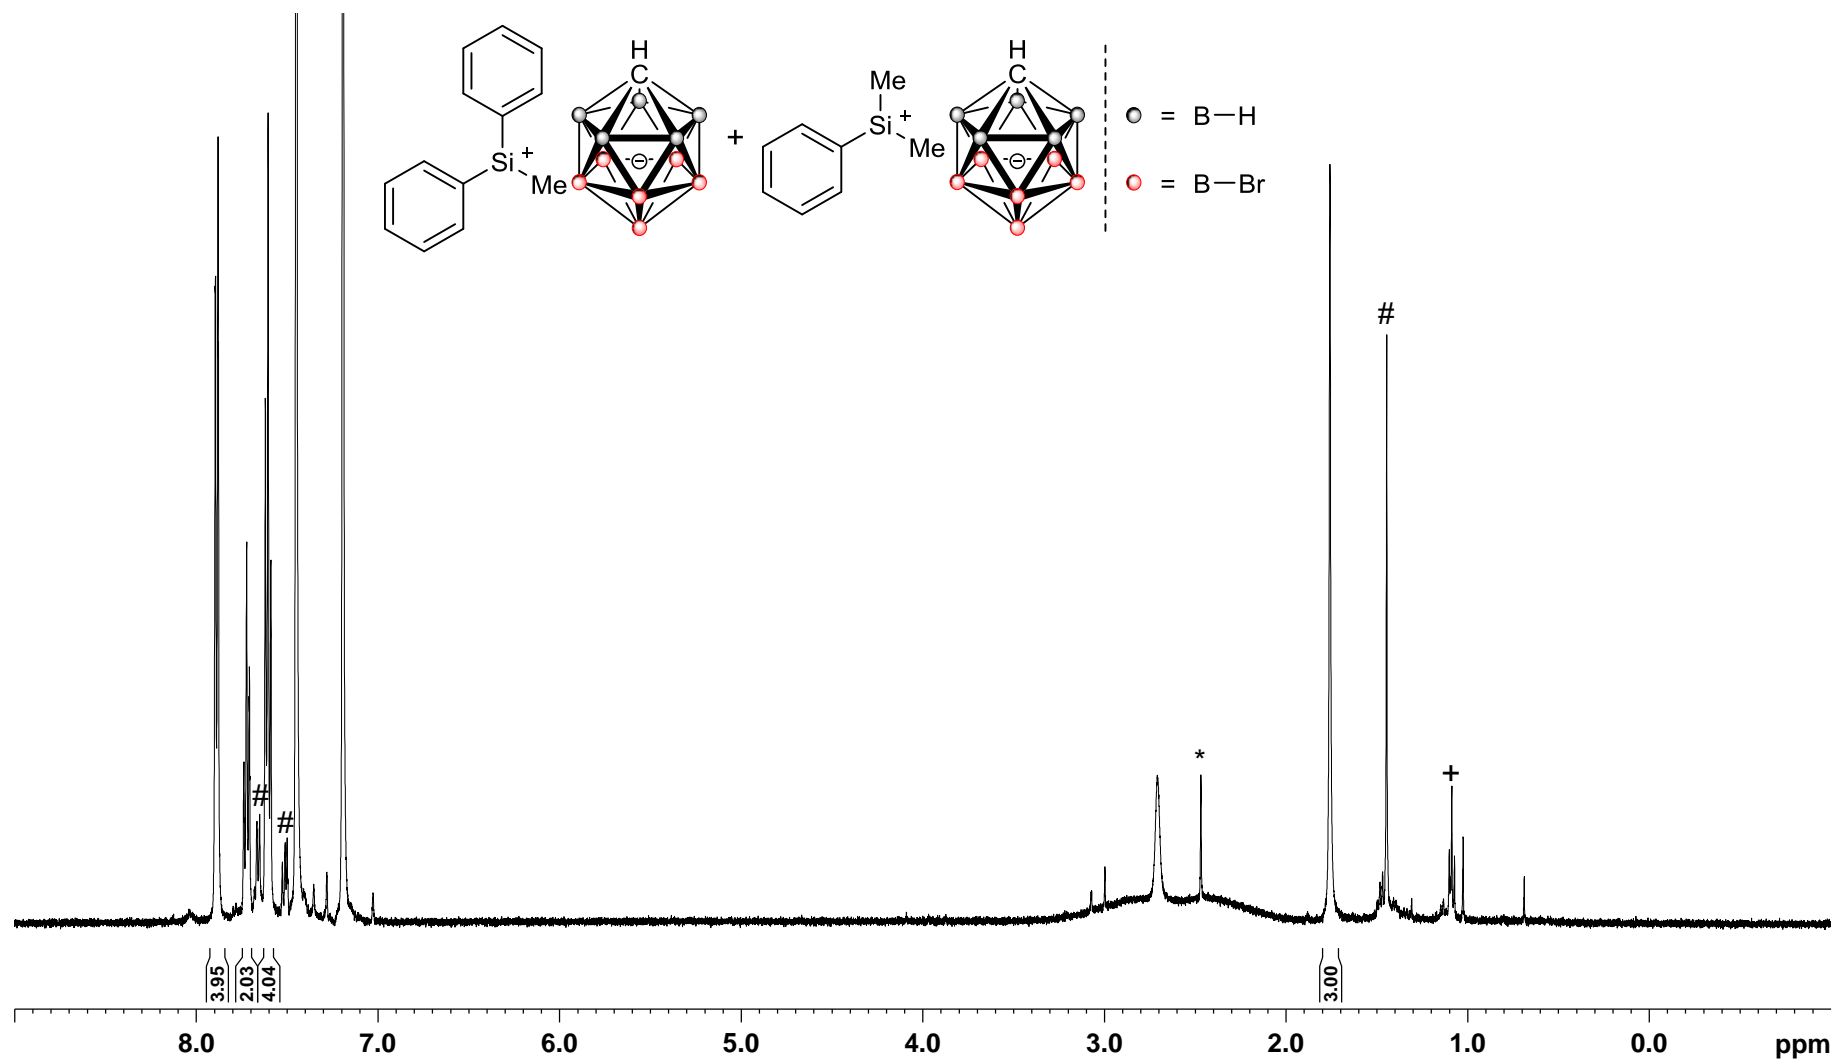

**Figure S27.**  $^{11}\text{B}$  NMR spectrum (161 MHz,  $o\text{-Cl}_2\text{C}_6\text{D}_4$ , 300 K) of  $\text{MePh}_2\text{Si}^+[\text{CHB}_{11}\text{H}_5\text{Br}_6]^-$  from the reaction of  $\text{MePh}_2\text{SiH}$  with  $\text{Ph}_3\text{C}^+[\text{CHB}_{11}\text{H}_5\text{Br}_6]^-$ .

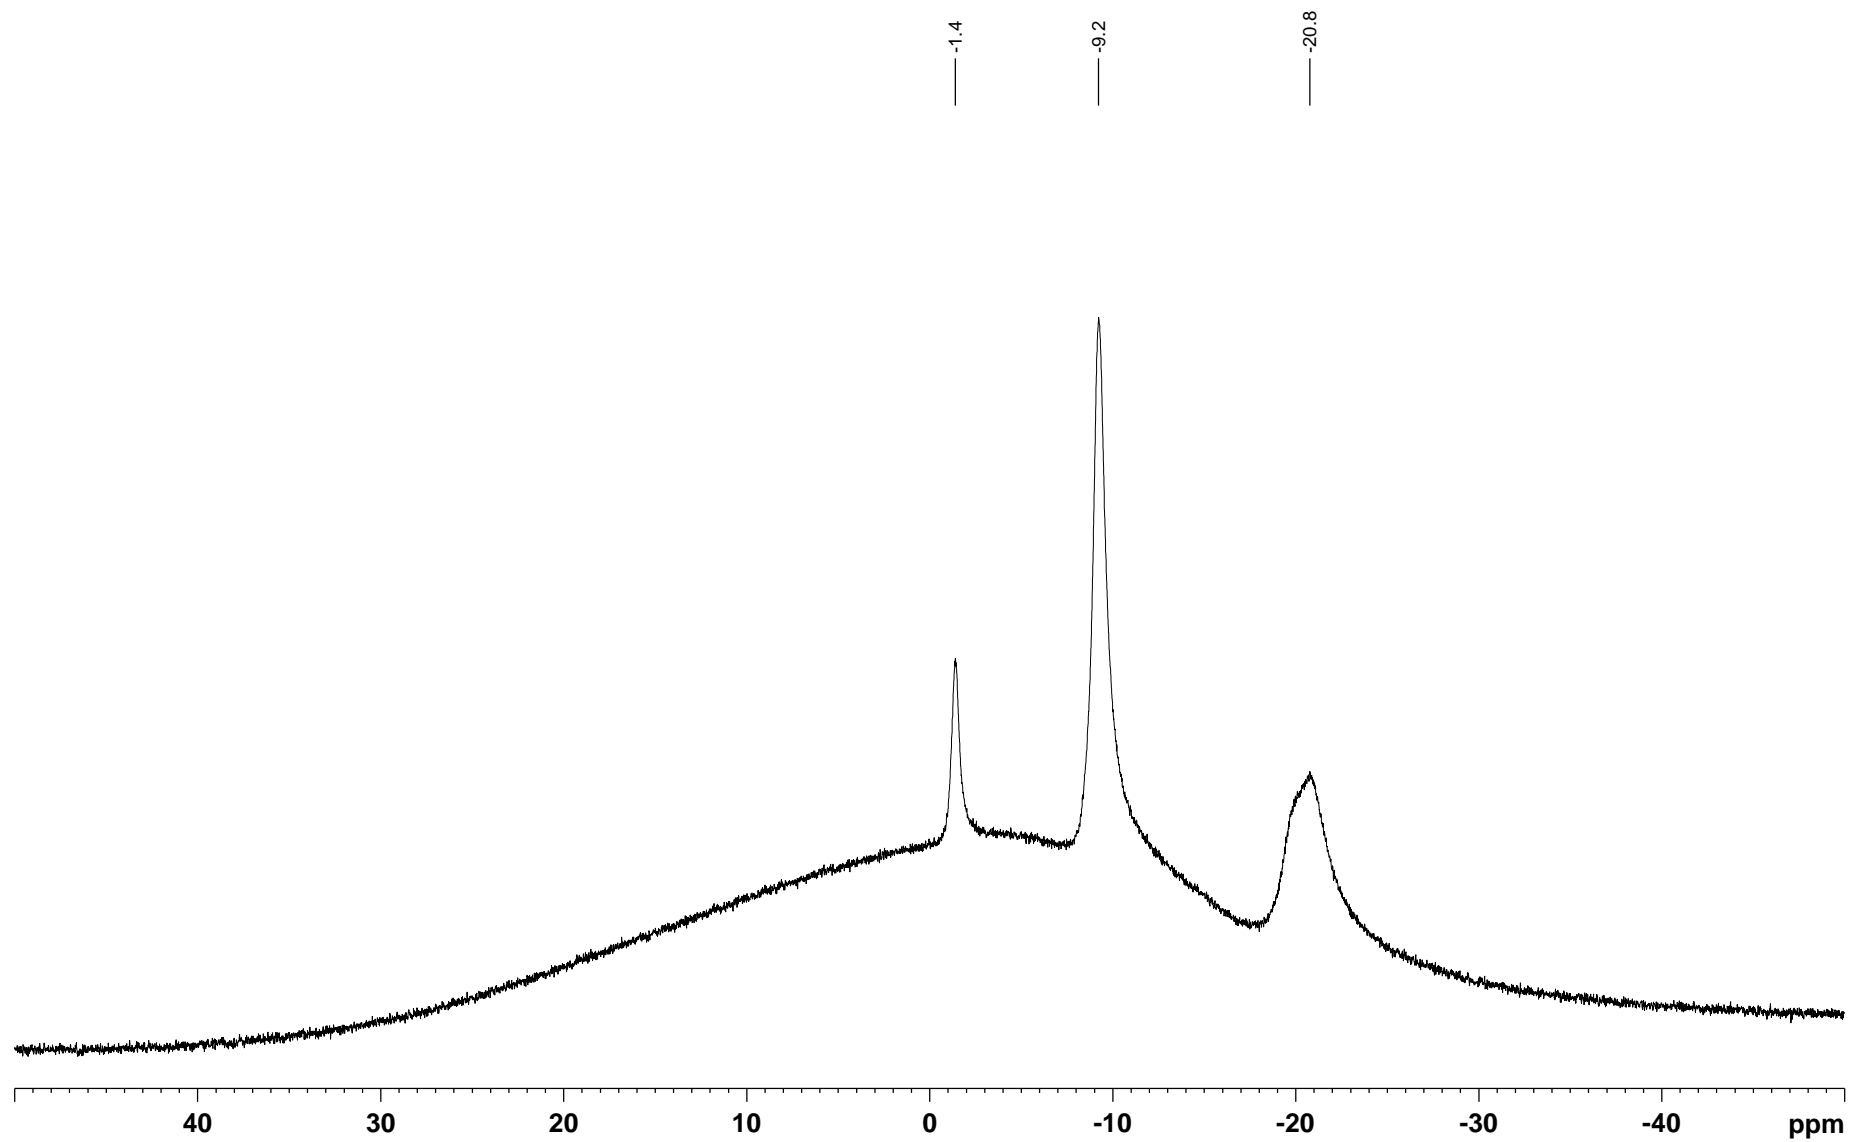



**Figure S28.**  $^{13}\text{C}\{^1\text{H}\}$  NMR spectrum (126 MHz,  $o\text{-Cl}_2\text{C}_6\text{D}_4$ , 300 K) of  $\text{MePh}_2\text{Si}^+[\text{CHB}_{11}\text{H}_5\text{Br}_6]^-$  from the reaction of  $\text{MePh}_2\text{SiH}$  with  $\text{Ph}_3\text{C}^+[\text{CHB}_{11}\text{H}_5\text{Br}_6]^-$ .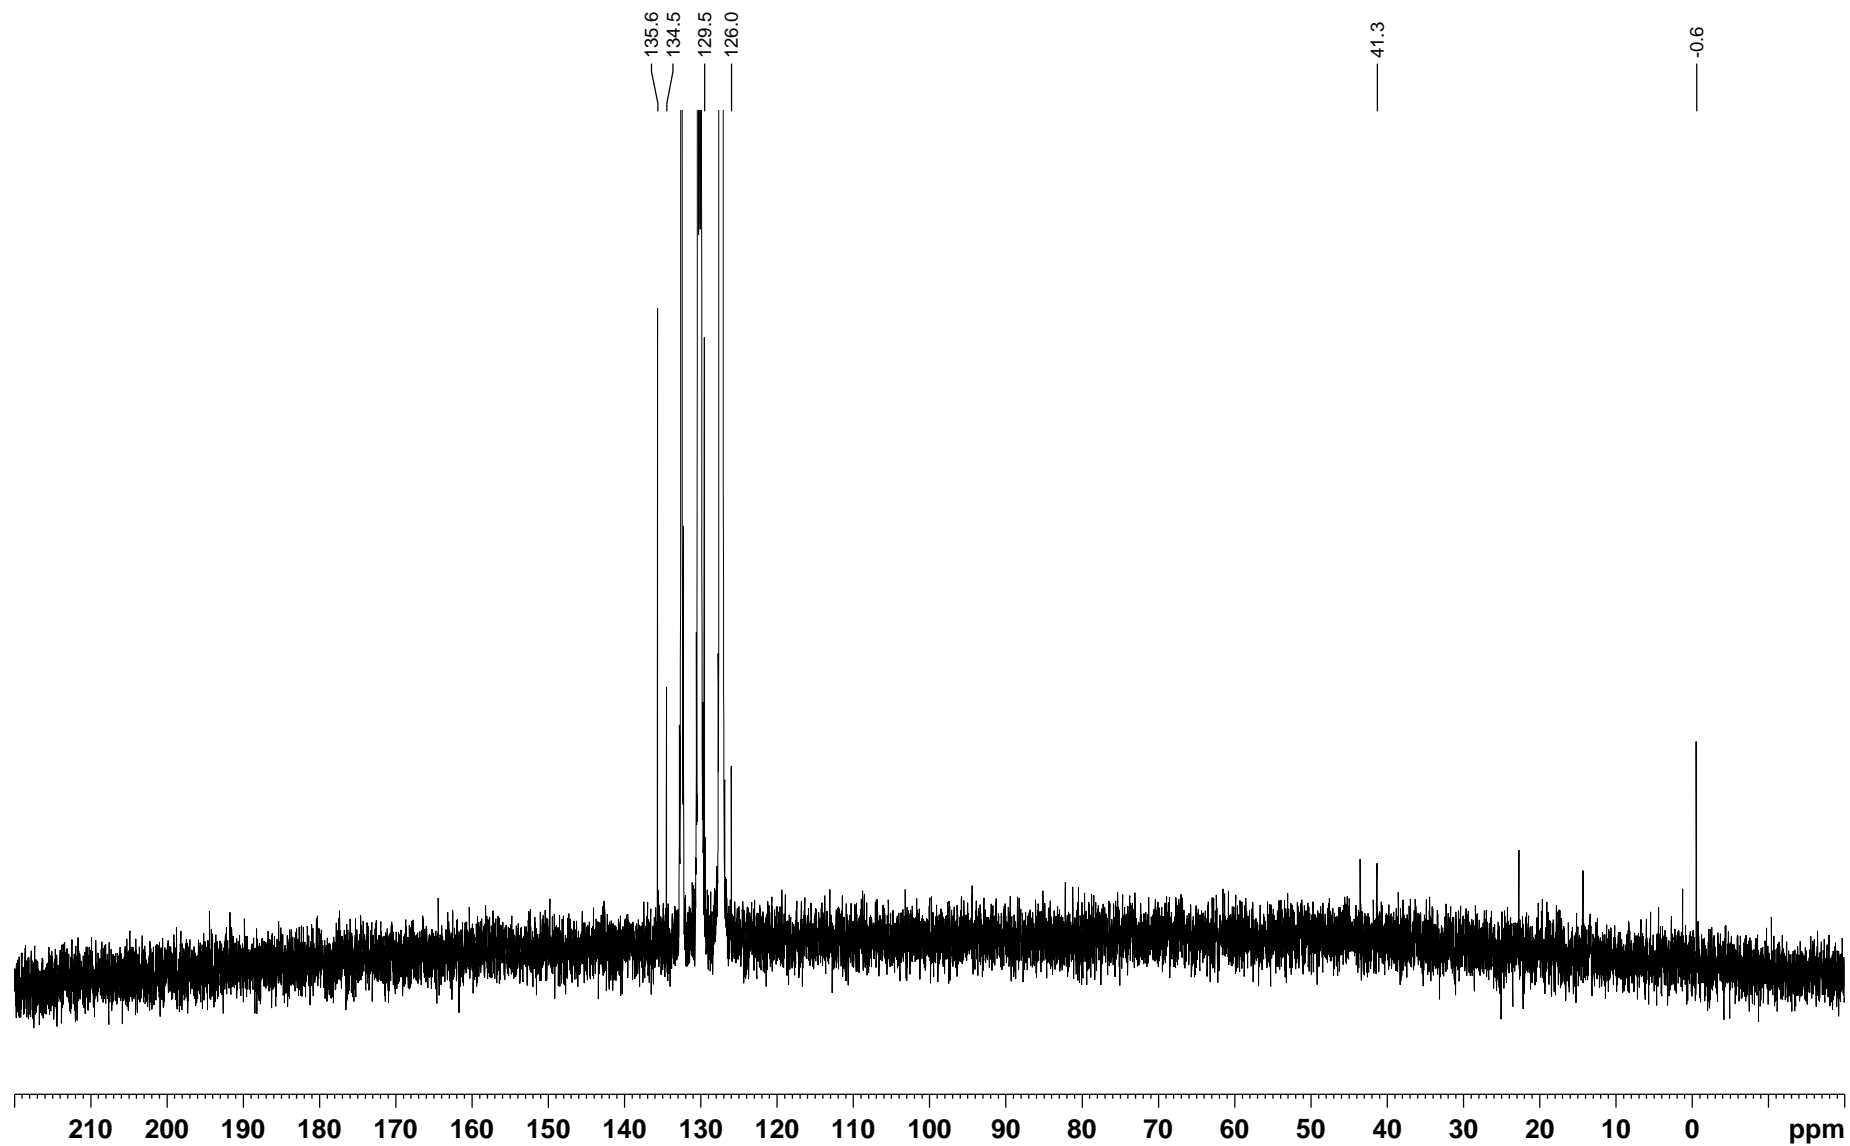

**Figure S29.**  $^1\text{H}/^{29}\text{Si}$  HMQC NMR spectrum (500/99 MHz,  $o\text{-Cl}_2\text{C}_6\text{D}_4$ , 300 K, optimized for  $J = 7$  Hz) of  $\text{MePh}_2\text{Si}^+[\text{CHB}_{11}\text{H}_5\text{Br}_6]^-$  from the reaction of  $\text{MePh}_2\text{SiH}$  with  $\text{Ph}_3\text{C}^+[\text{CHB}_{11}\text{H}_5\text{Br}_6]^-$ .

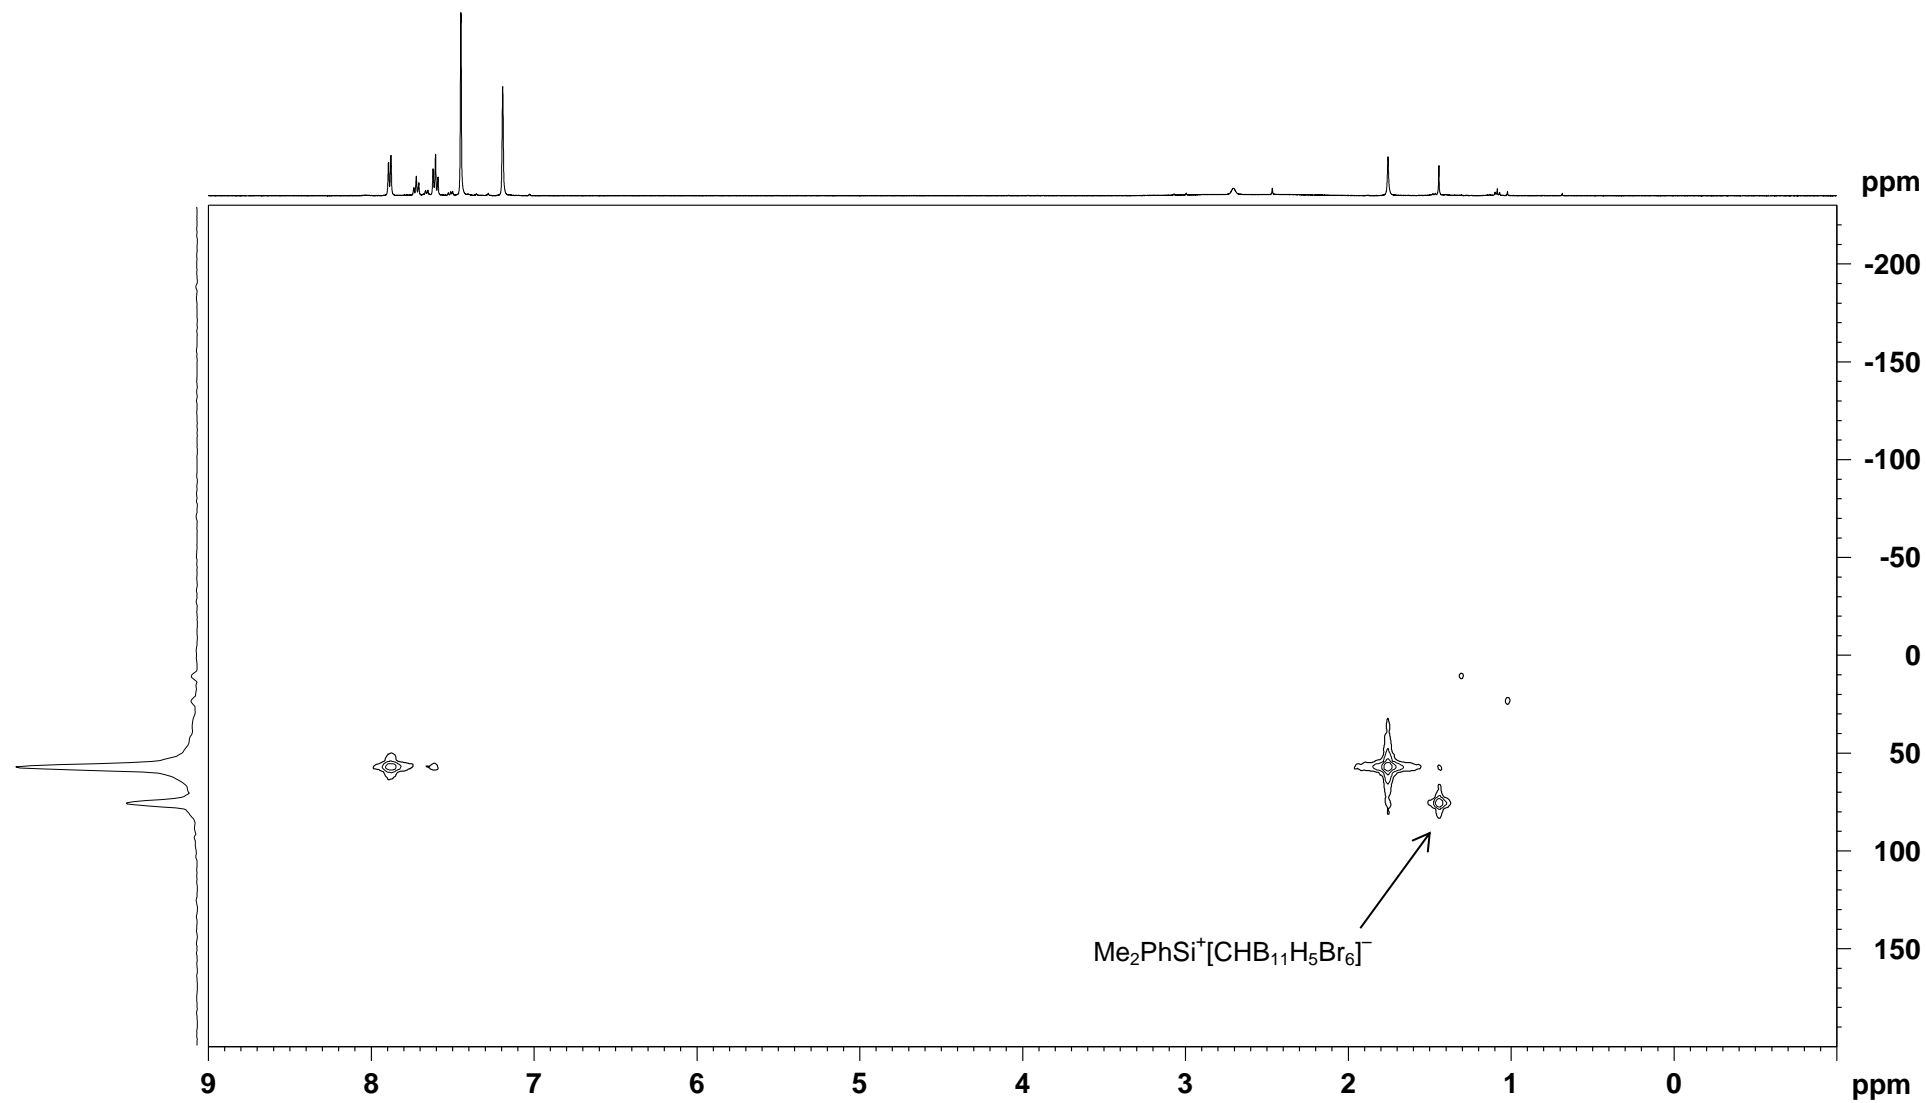

**Figure S30.**  $^1\text{H}$  NMR spectrum (500 MHz,  $o\text{-Cl}_2\text{C}_6\text{D}_4$ , 300 K) of  $\text{Me}_3\text{Si}^+[\text{CHB}_{11}\text{H}_5\text{Br}_6]^-$  from the reaction of  $\text{Me}_2\text{PhSiH}$  with  $\text{Ph}_3\text{C}^+[\text{CHB}_{11}\text{H}_5\text{Br}_6]^-$  (+ = *n*-pentane, # = impurity).

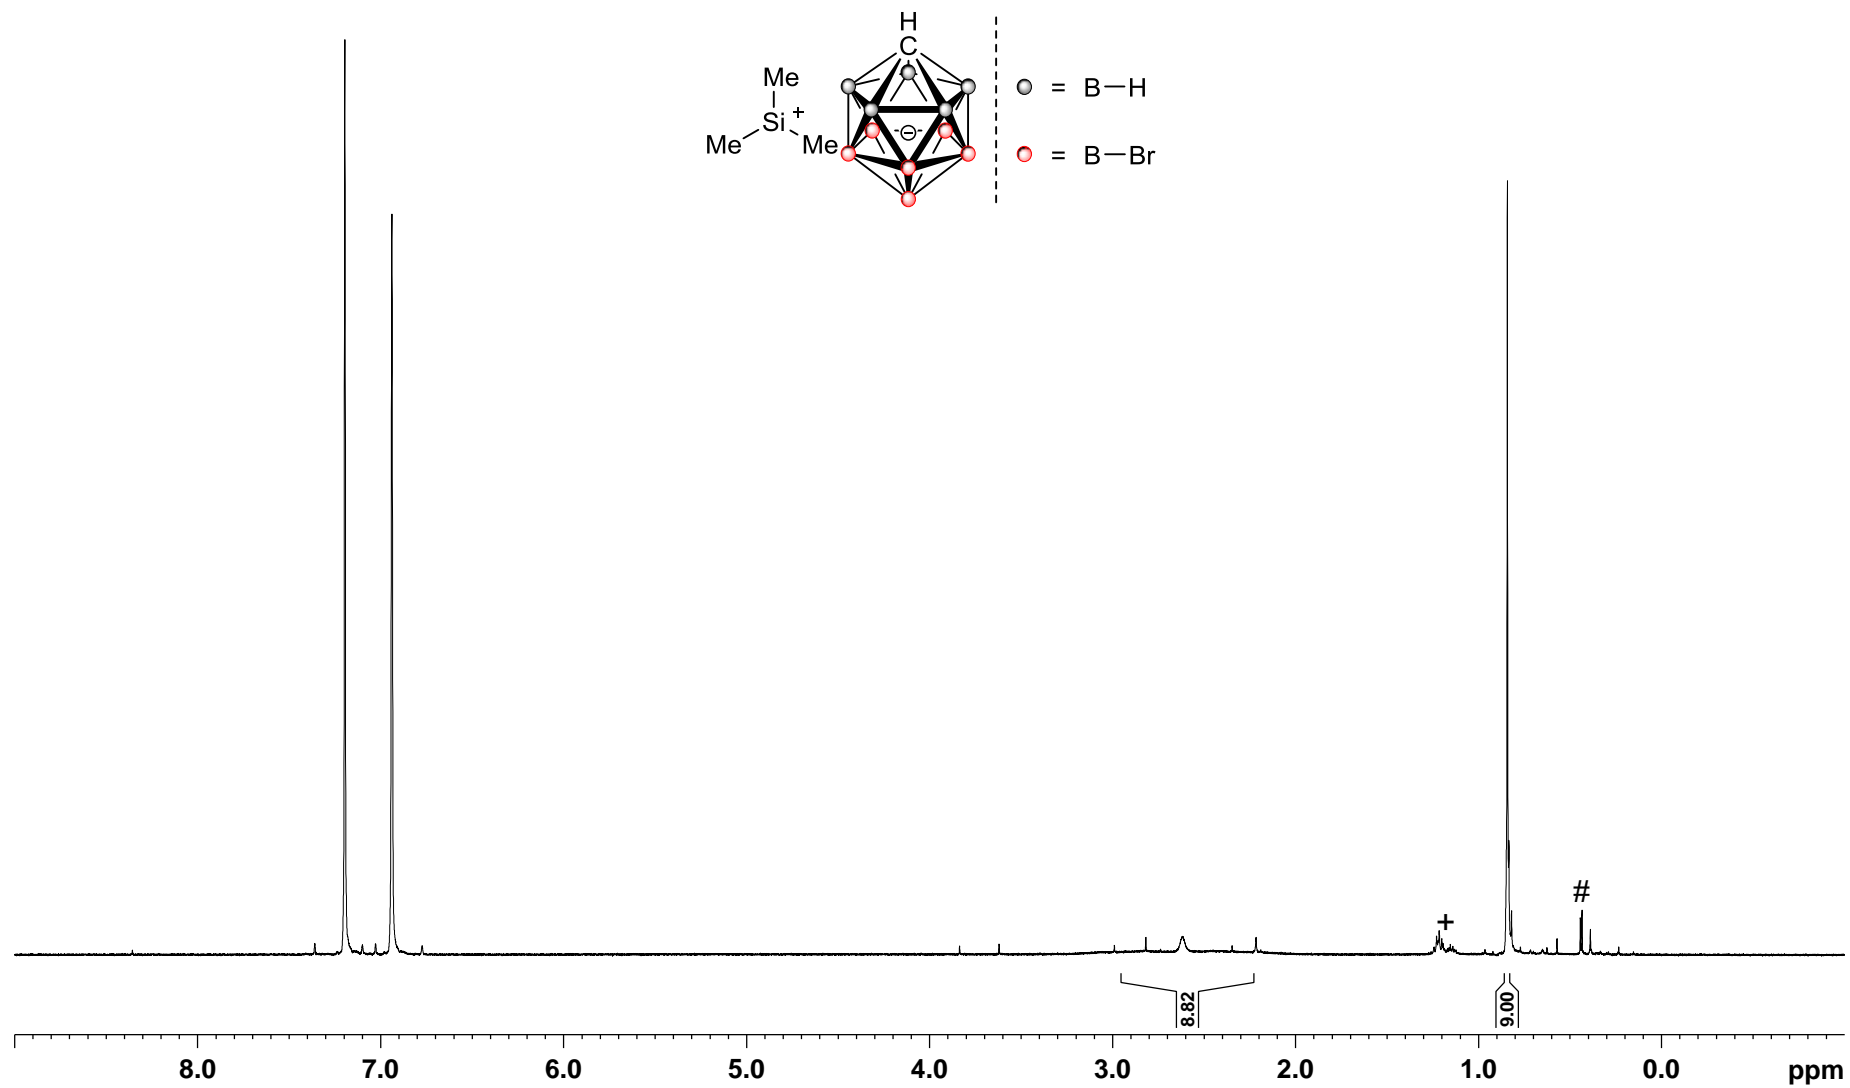

**Figure S31.**  $^{11}\text{B}$  NMR spectrum (161 MHz,  $o\text{-Cl}_2\text{C}_6\text{D}_4$ , 300 K) of  $\text{Me}_3\text{Si}^+[\text{CHB}_{11}\text{H}_5\text{Br}_6]^-$  from the reaction of  $\text{Me}_2\text{PhSiH}$  with  $\text{Ph}_3\text{C}^+[\text{CHB}_{11}\text{H}_5\text{Br}_6]^-$ .

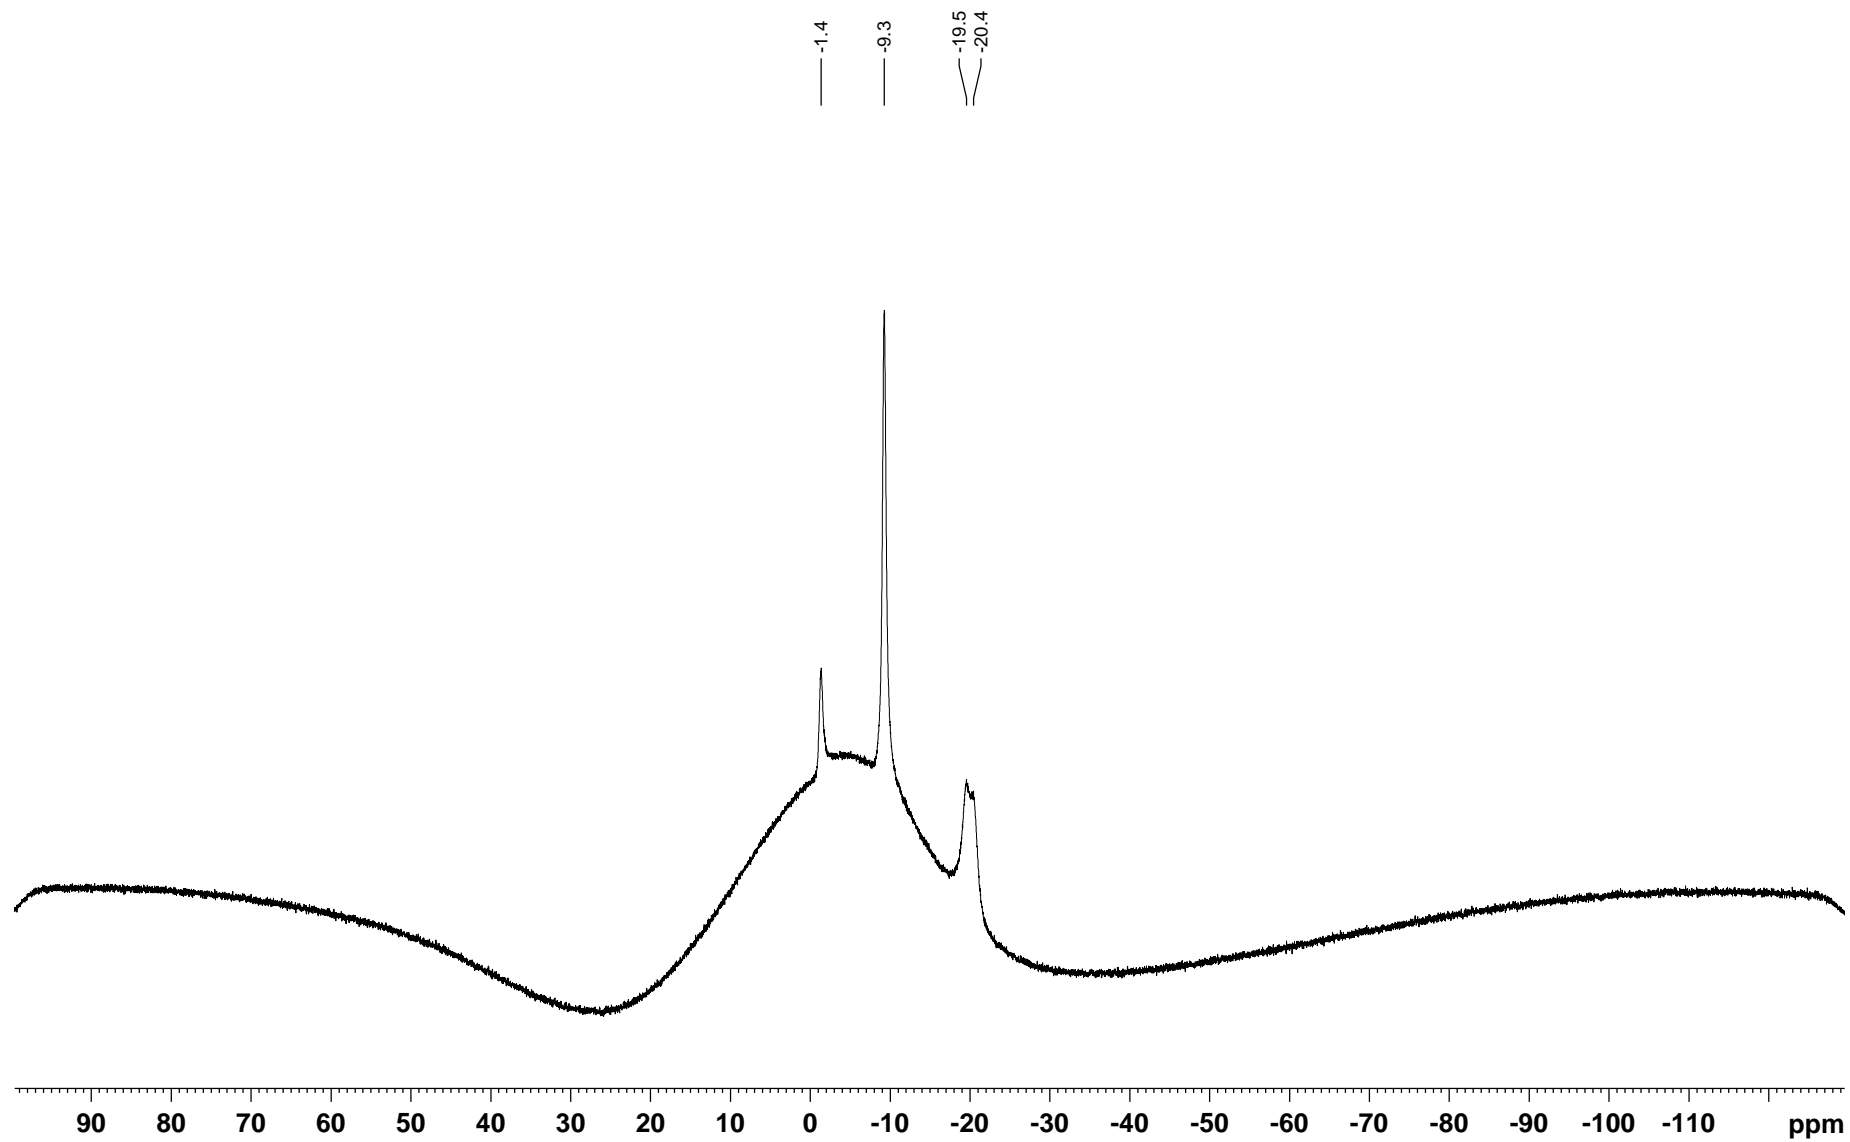

**Figure S32.**  $^{13}\text{C}\{^1\text{H}\}$  DEPT NMR spectrum (126 MHz,  $o\text{-Cl}_2\text{C}_6\text{D}_4$ , 300 K) of  $\text{Me}_3\text{Si}^+[\text{CHB}_{11}\text{H}_5\text{Br}_6]^-$  from the reaction of  $\text{Me}_2\text{PhSiH}$  with  $\text{Ph}_3\text{C}^+[\text{CHB}_{11}\text{H}_5\text{Br}_6]^-$ .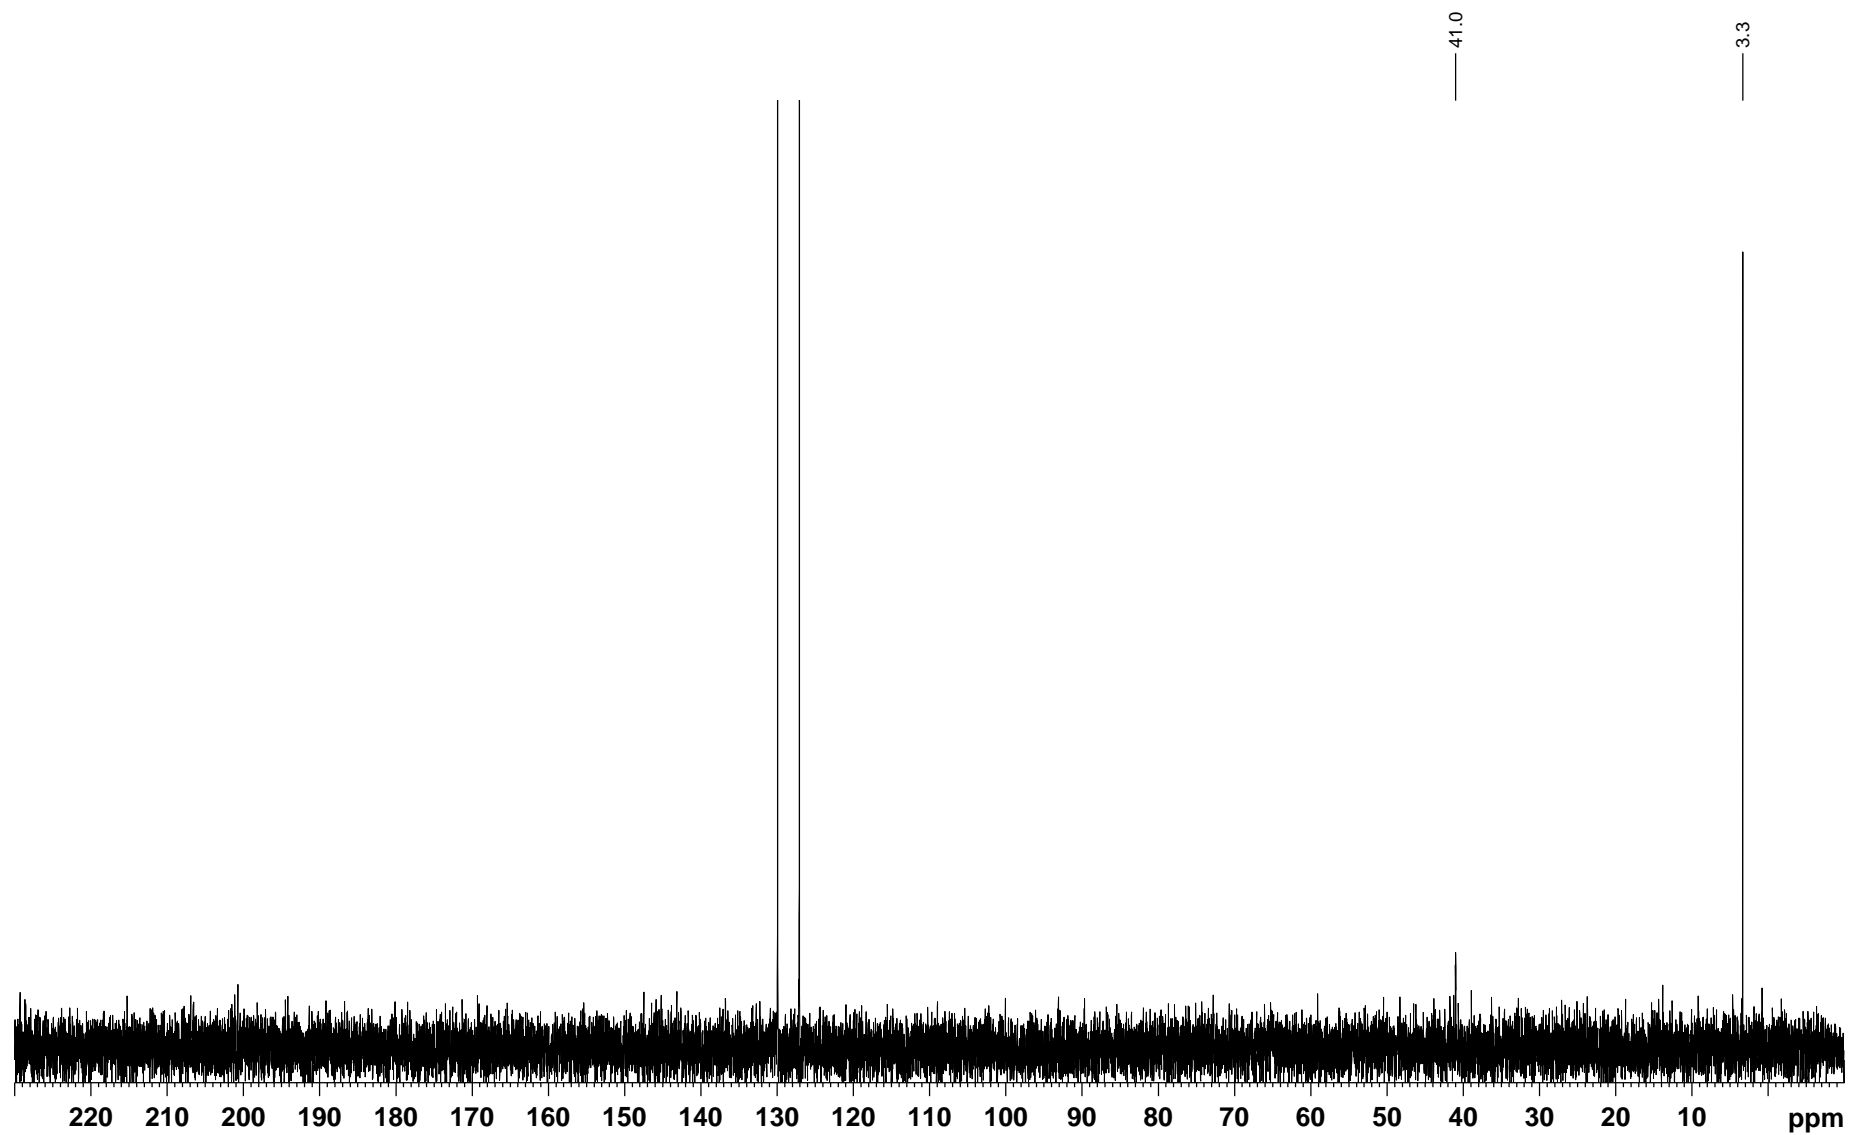

**Figure S33.**  $^1\text{H}/^{29}\text{Si}$  HMQC NMR spectrum (500/99 MHz,  $o\text{-Cl}_2\text{C}_6\text{D}_4$ , 300 K, optimized for  $J = 7$  Hz) of  $\text{Me}_3\text{Si}^+[\text{CHB}_{11}\text{H}_5\text{Br}_6]^-$  from the reaction of  $\text{Me}_2\text{PhSiH}$  with  $\text{Ph}_3\text{C}^+[\text{CHB}_{11}\text{H}_5\text{Br}_6]^-$ .

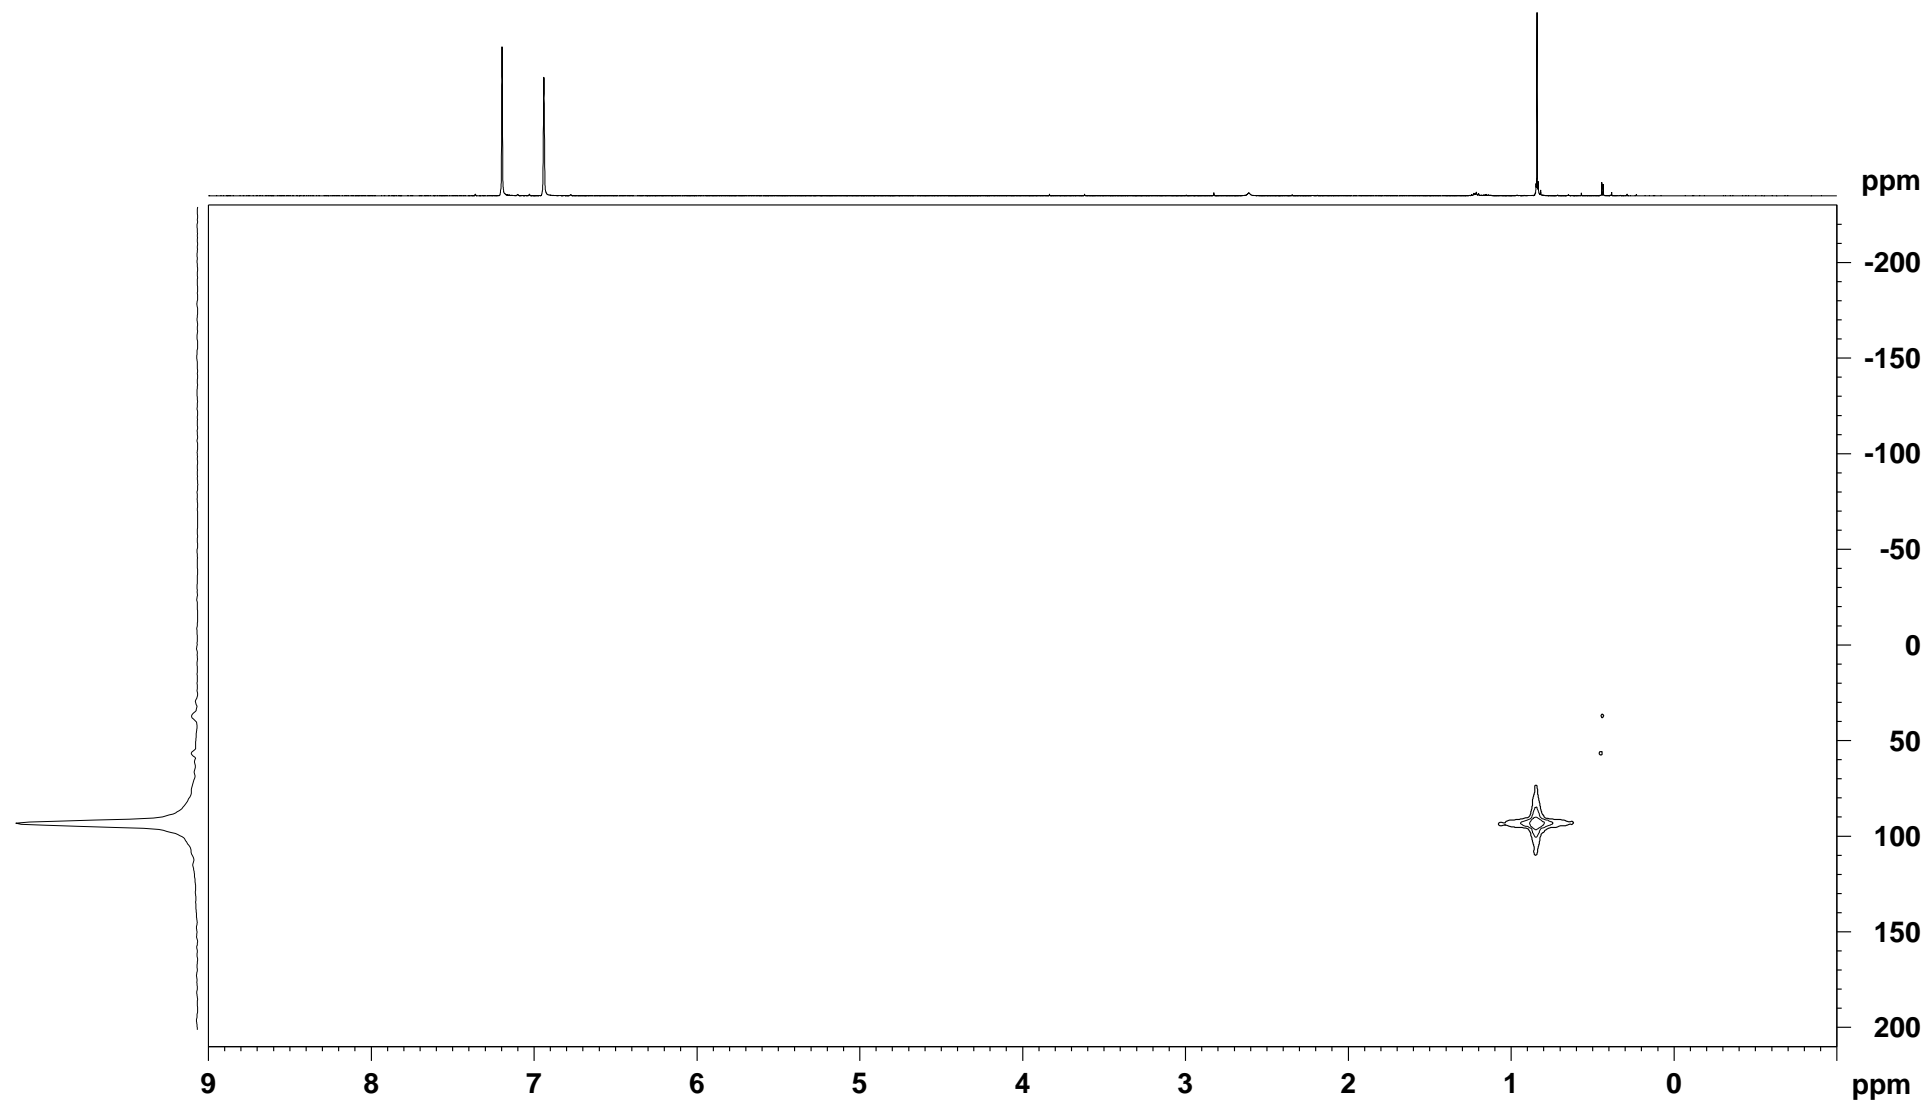

**Figure S34.**  $^1\text{H}$  NMR spectrum (500 MHz,  $\text{o-Cl}_2\text{C}_6\text{D}_4$ , 298 K) of  $(\text{C}_6\text{Me}_5)_3\text{Si}^+[\text{B}(\text{C}_6\text{F}_5)_4]^-$  from the reaction of  $\text{Me}_2(\text{C}_6\text{Me}_5)\text{SiH}$  with  $\text{Ph}_3\text{C}^+[\text{B}(\text{C}_6\text{F}_5)_4]^-$  (# = impurities).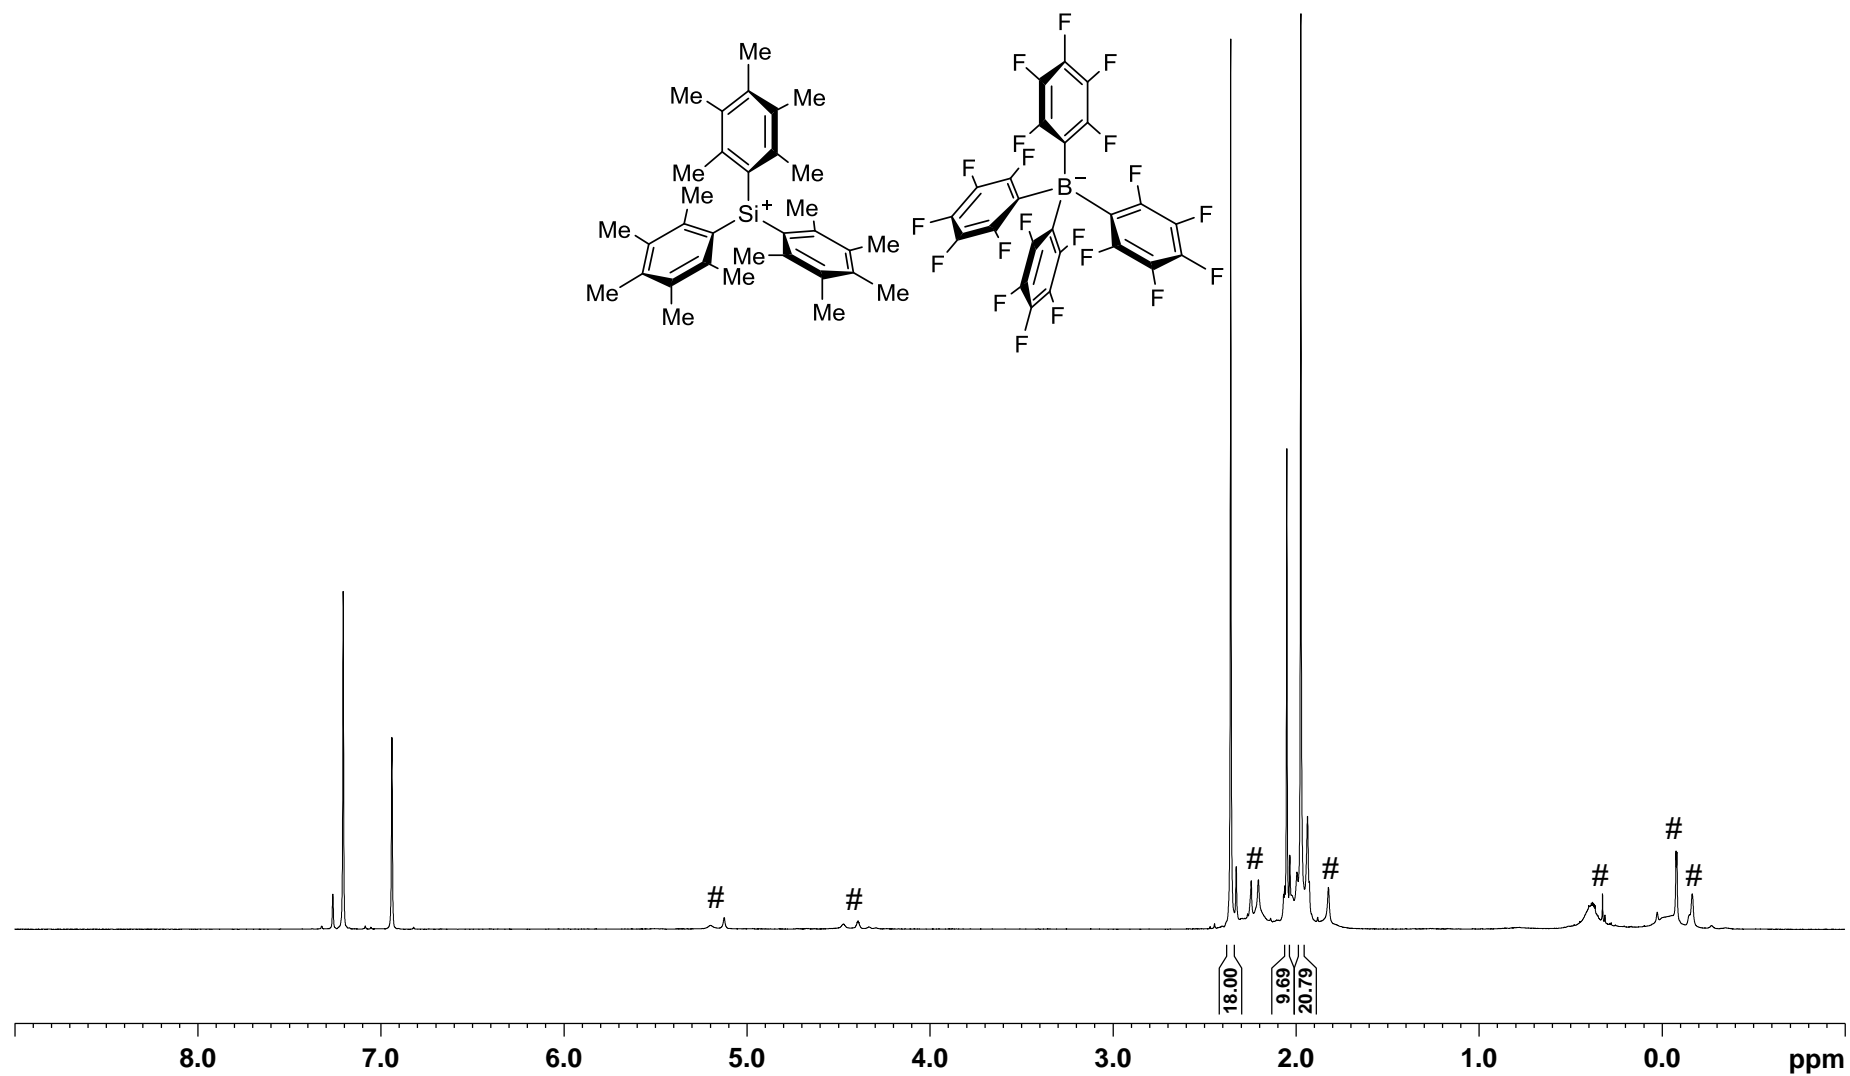

**Figure S35.**  $^1\text{H}/^{29}\text{Si}$  HMQC NMR spectrum (500/99 MHz,  $o\text{-Cl}_2\text{C}_6\text{D}_4$ , 298 K, optimized for  $J = 3$  Hz) of  $(\text{C}_6\text{Me}_5)_3\text{Si}^+[\text{B}(\text{C}_6\text{F}_5)_4]^-$  from the reaction of  $\text{Me}_2(\text{C}_6\text{Me}_5)\text{SiH}$  with  $\text{Ph}_3\text{C}^+[\text{B}(\text{C}_6\text{F}_5)_4]^-$ .

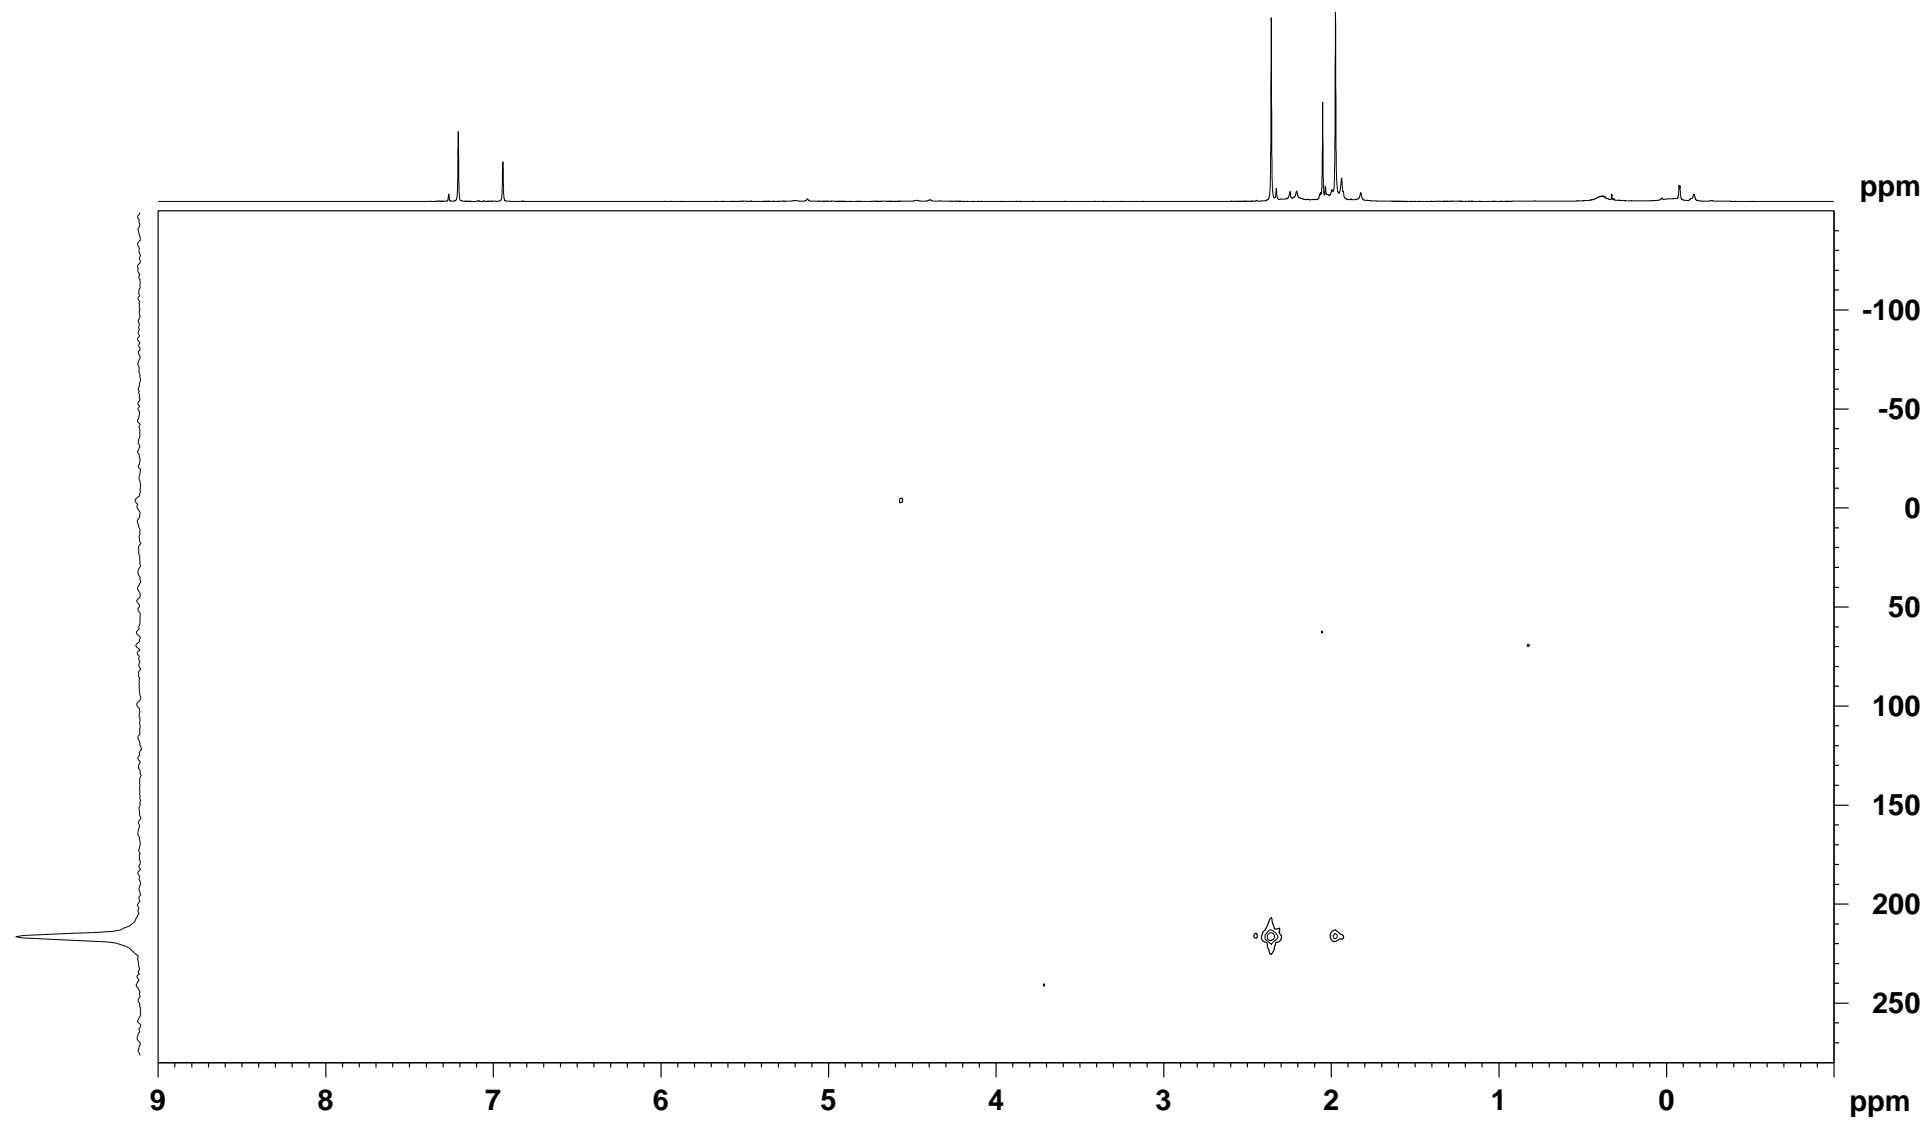



**Figure S36.**  $^1\text{H}$  NMR spectrum (500 MHz,  $o\text{-Cl}_2\text{C}_6\text{D}_4$ , 300 K) of  $\text{Me}_3\text{Si}^+[\text{CHB}_{11}\text{H}_5\text{Br}_6]^-$  with small amounts of  $(\text{C}_6\text{Me}_5)_3\text{Si}^+[\text{CHB}_{11}\text{H}_5\text{Br}_6]^-$  from the reaction of  $\text{Me}_2(\text{C}_6\text{Me}_5)\text{SiH}$  with  $\text{Ph}_3\text{C}^+[\text{CHB}_{11}\text{H}_5\text{Br}_6]^-$  (\* = impurity, + = *n*-pentane, # =  $(\text{C}_6\text{Me}_5)_3\text{Si}^+[\text{CHB}_{11}\text{H}_5\text{Br}_6]^-$ ).

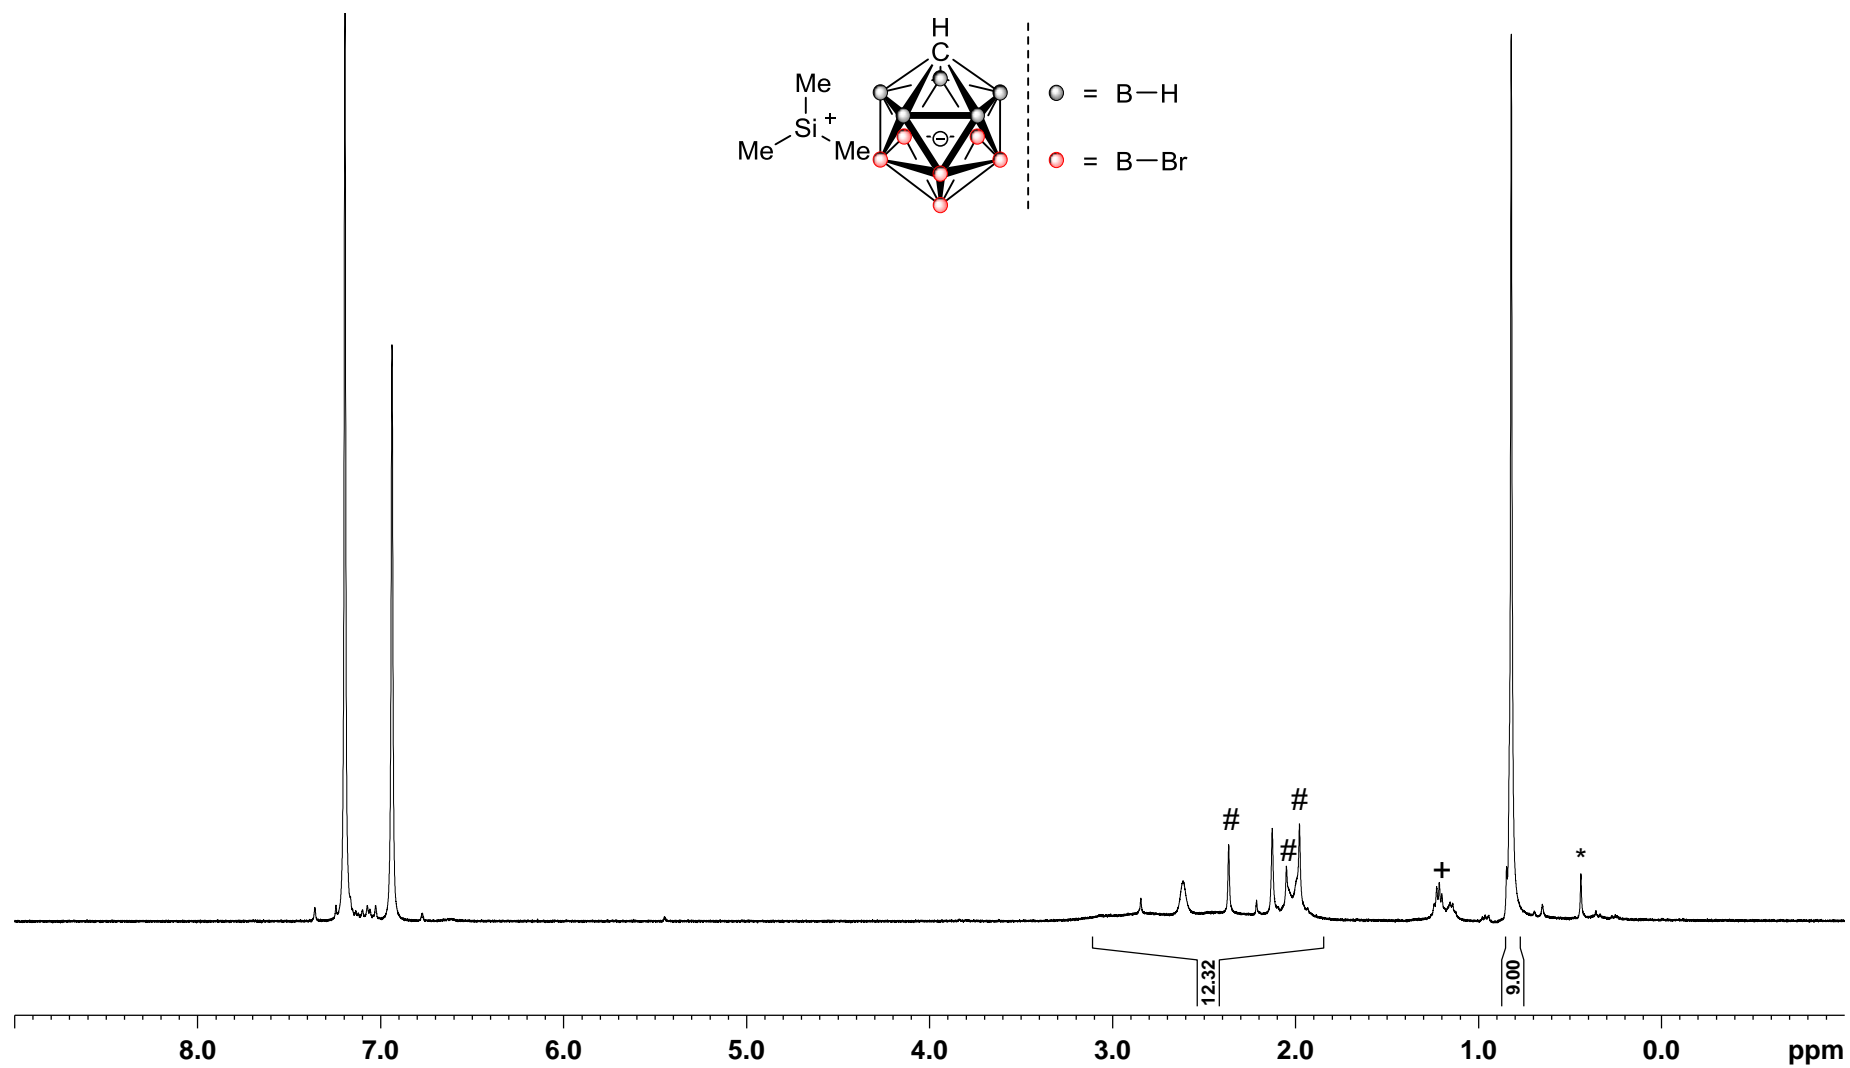

**Figure S37.**  $^1\text{H}/^{29}\text{Si}$  HMQC NMR spectrum (500/99 MHz,  $o\text{-Cl}_2\text{C}_6\text{D}_4$ , 300 K, optimized for  $J = 7$  Hz) of  $\text{Me}_3\text{Si}^+[\text{CHB}_{11}\text{H}_5\text{Br}_6]^-$  from the reaction of  $\text{Me}_2(\text{C}_6\text{Me}_5)\text{SiH}$  with  $\text{Ph}_3\text{C}^+[\text{CHB}_{11}\text{H}_5\text{Br}_6]^-$ .

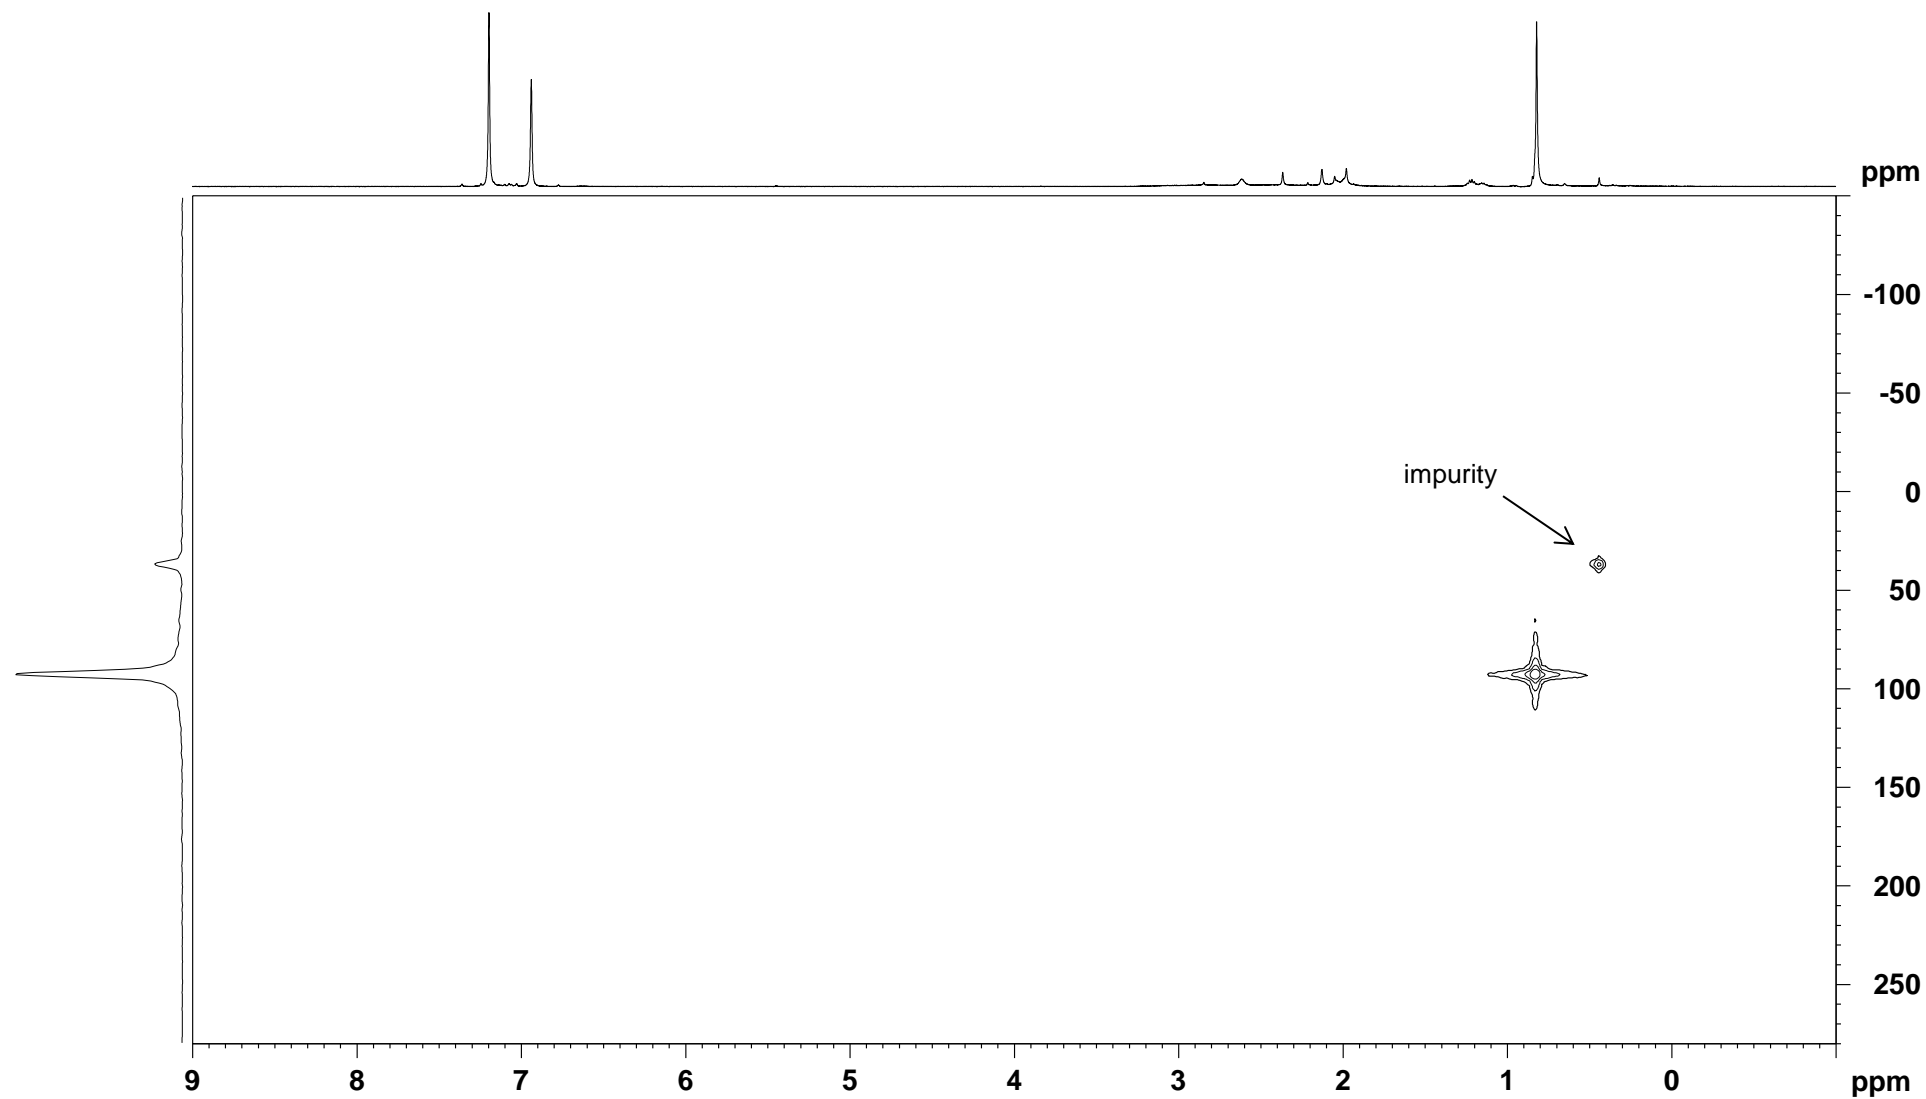

**Figure S38.**  $^1\text{H}$  NMR spectrum (500 MHz,  $o\text{-Cl}_2\text{C}_6\text{D}_4$ , 298 K) of  $\text{Et}_3\text{Si}^+[\text{CHB}_{11}\text{H}_5\text{Br}_6]^-$  from the reaction of  $\text{Et}_2\text{PhSiH}$  with  $\text{Ph}_3\text{C}^+[\text{CHB}_{11}\text{H}_5\text{Br}_6]^-$  (# = impurity).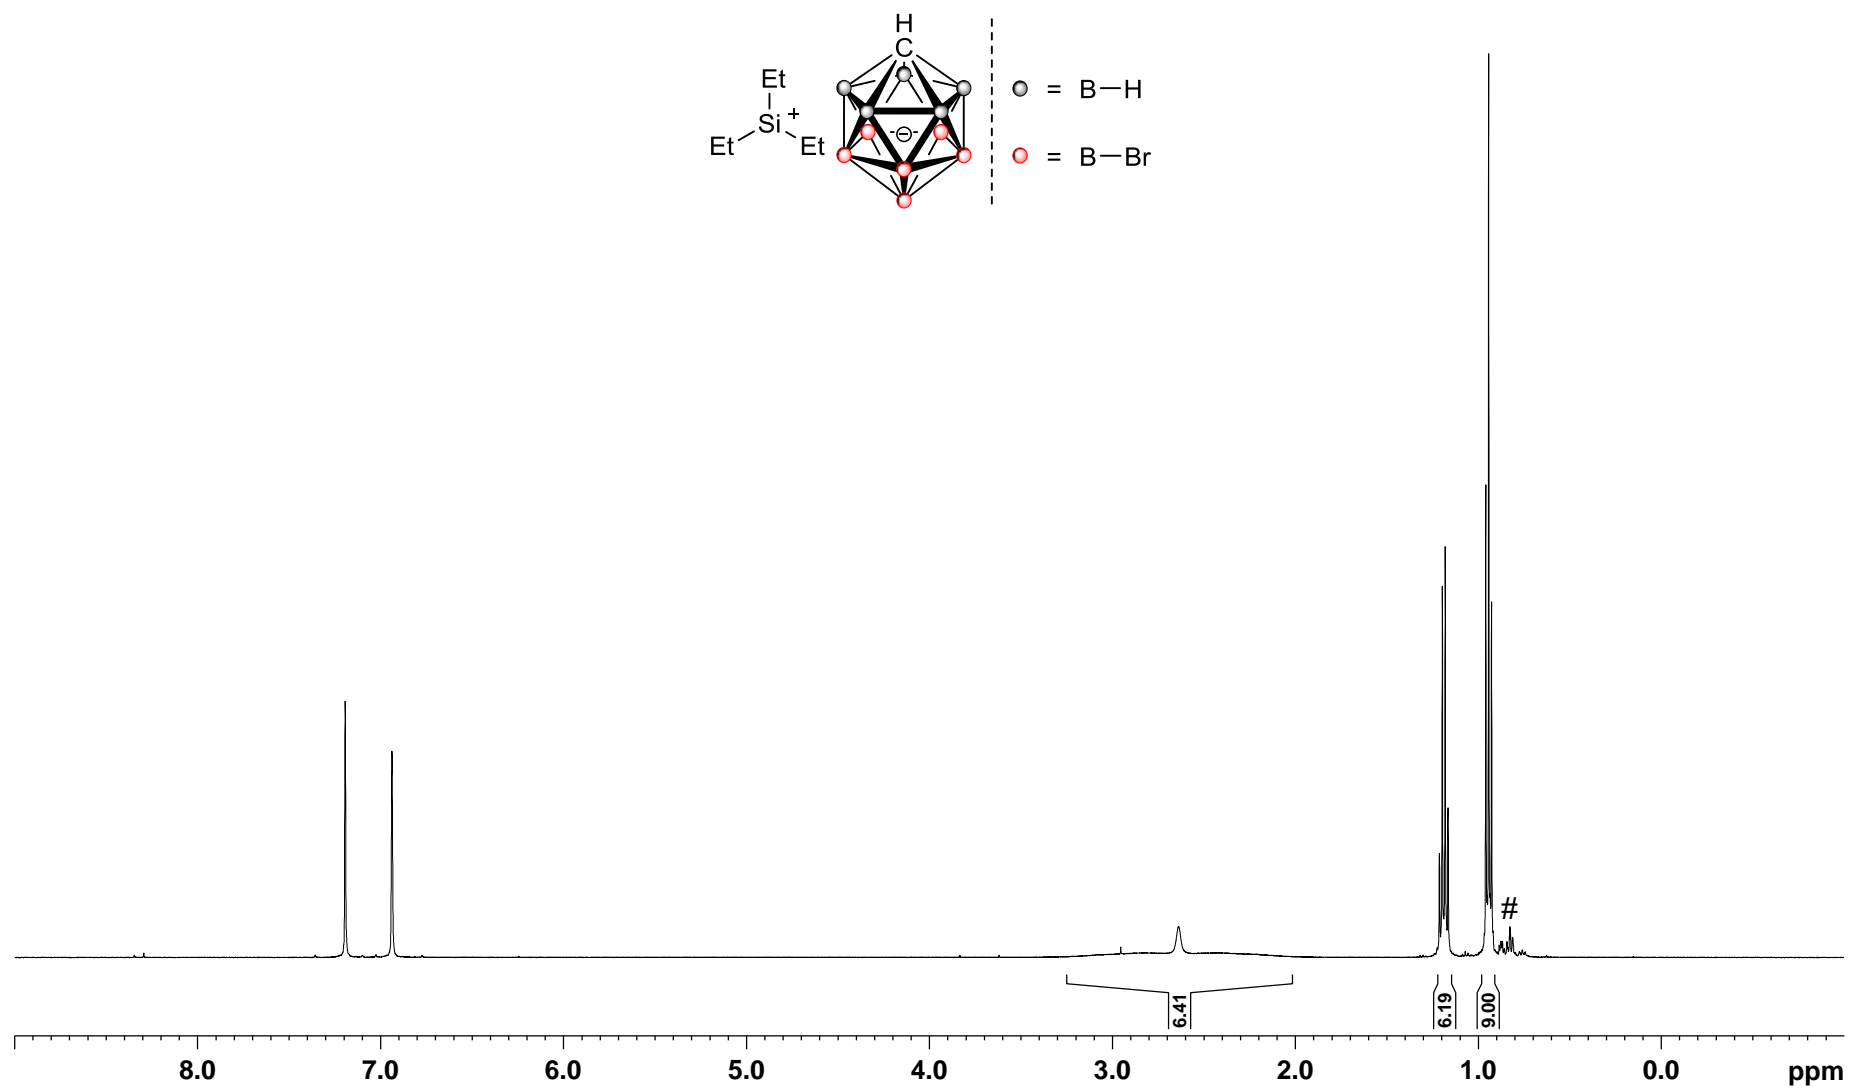

**Figure S39.**  $^{11}\text{B}$  NMR spectrum (161 MHz,  $o\text{-Cl}_2\text{C}_6\text{D}_4$ , 298 K) of  $\text{Et}_3\text{Si}^+[\text{CHB}_{11}\text{H}_5\text{Br}_6]^-$  from the reaction of  $\text{Et}_2\text{PhSiH}$  with  $\text{Ph}_3\text{C}^+[\text{CHB}_{11}\text{H}_5\text{Br}_6]^-$ .

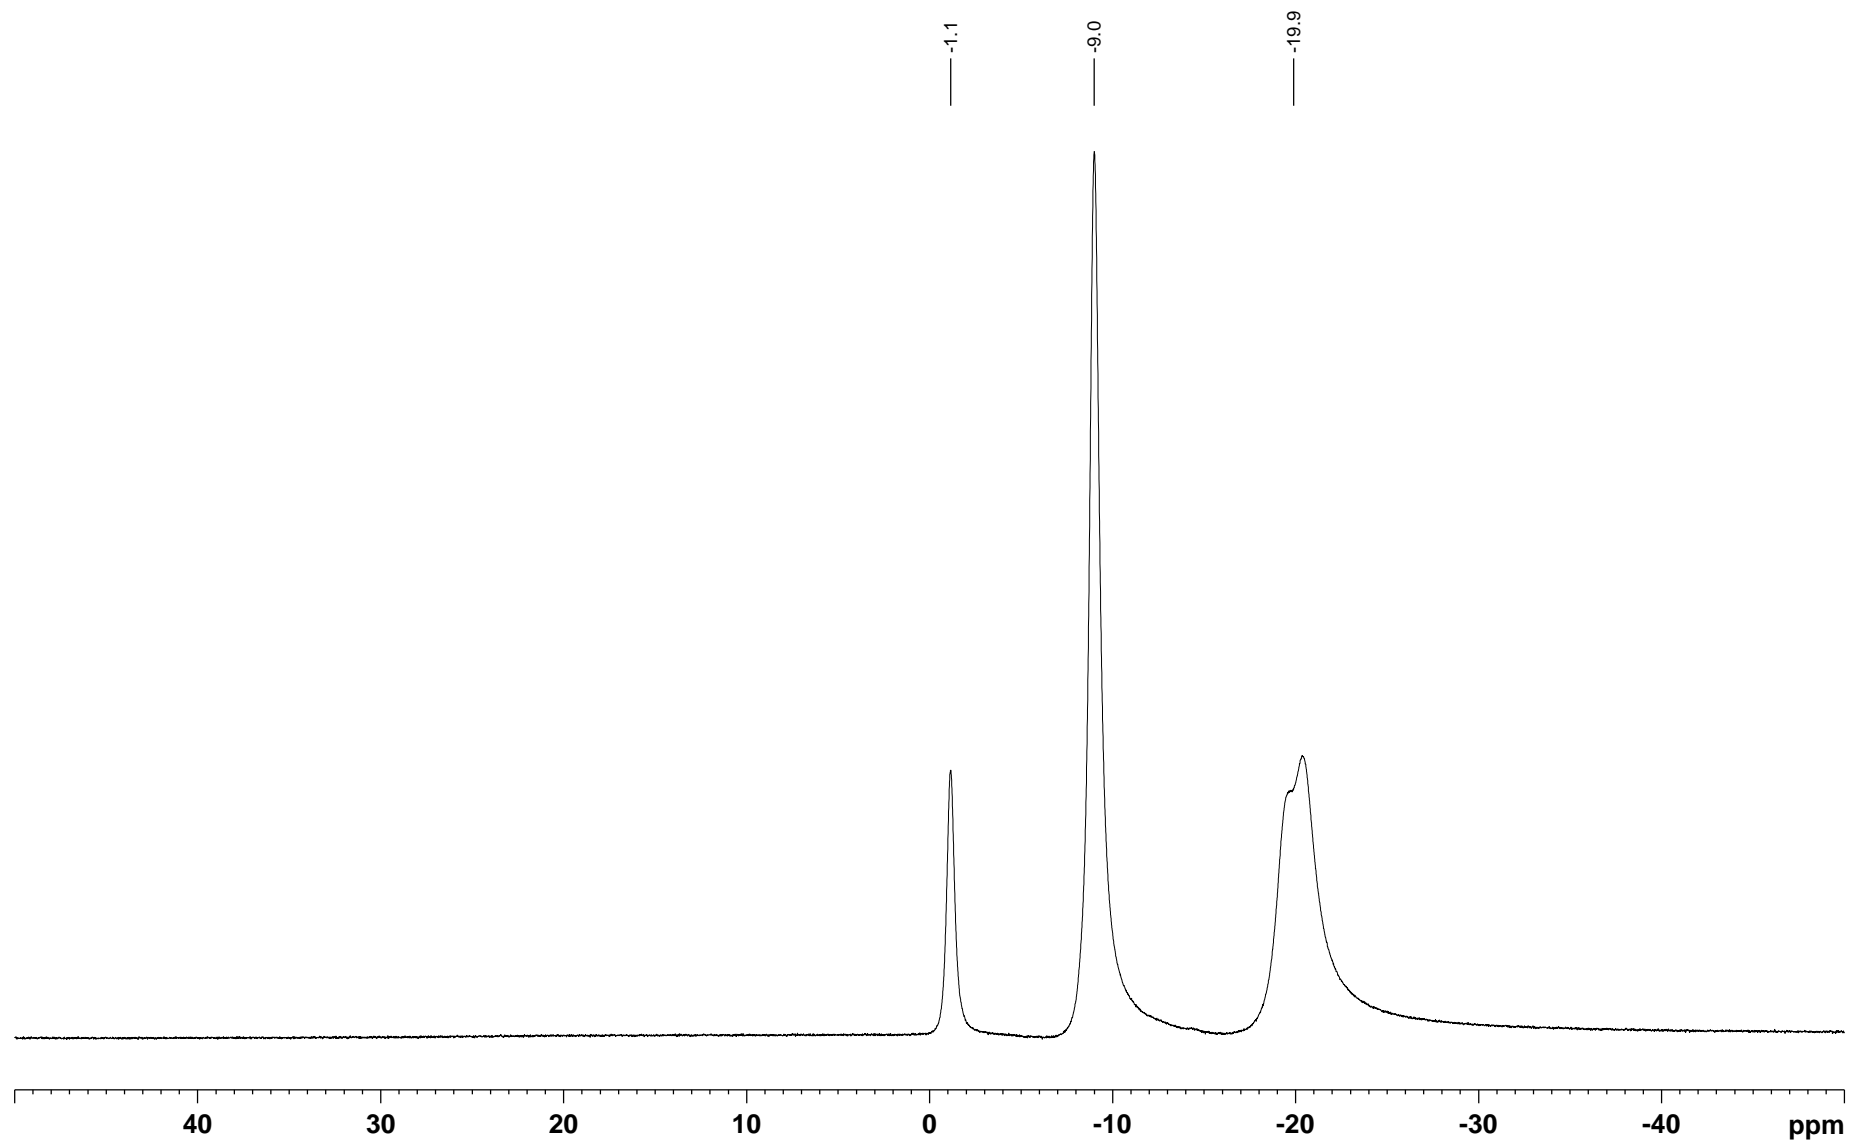

**Figure S40.**  $^{13}\text{C}\{^1\text{H}\}$  DEPT NMR spectrum (126 MHz,  $o\text{-Cl}_2\text{C}_6\text{D}_4$ , 298 K) of  $\text{Et}_3\text{Si}^+[\text{CHB}_{11}\text{H}_5\text{Br}_6]^-$  from the reaction of  $\text{Et}_2\text{PhSiH}$  with  $\text{Ph}_3\text{C}^+[\text{CHB}_{11}\text{H}_5\text{Br}_6]^-$ .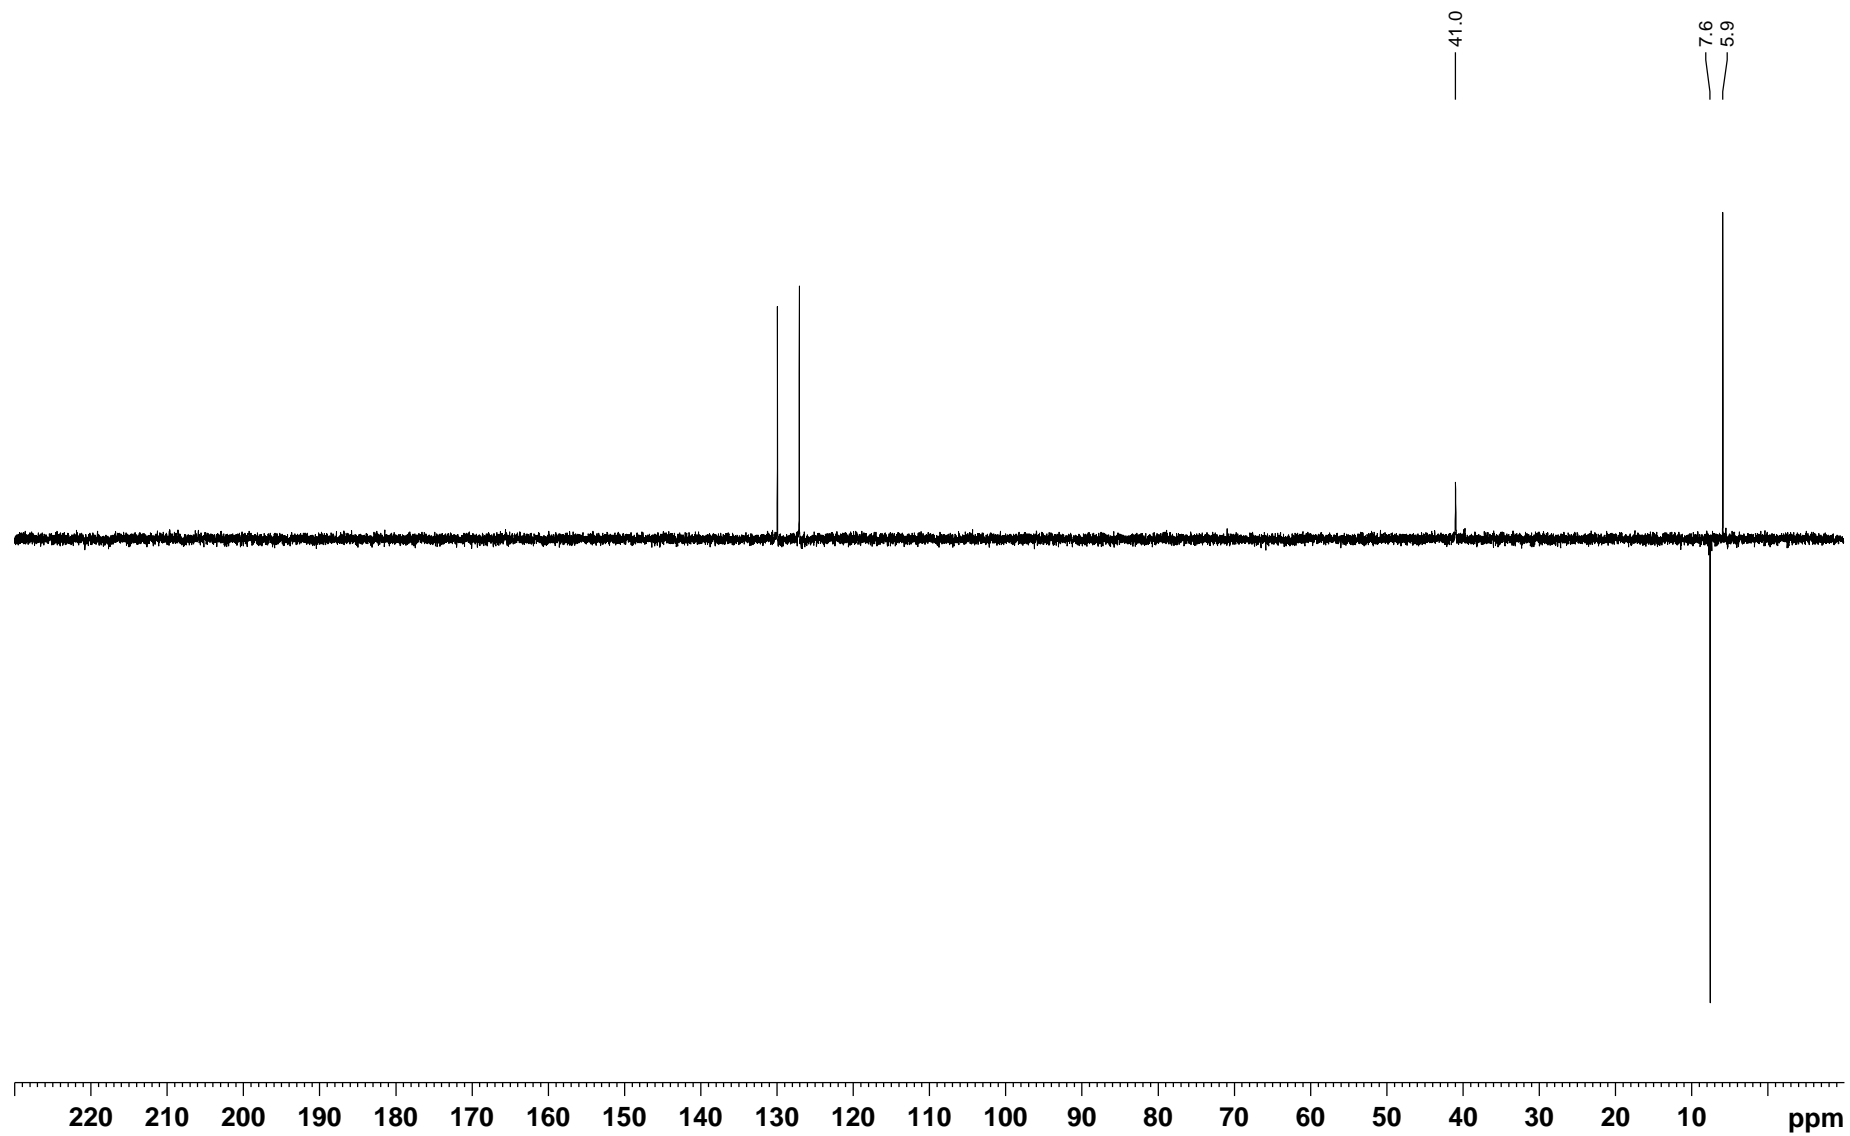

**Figure S41.**  $^1\text{H}/^{29}\text{Si}$  HMQC NMR spectrum (500/99 MHz,  $o\text{-Cl}_2\text{C}_6\text{D}_4$ , 298 K, optimized for  $J = 7$  Hz) of  $\text{Et}_3\text{Si}^+[\text{CHB}_{11}\text{H}_5\text{Br}_6]^-$  from the reaction of  $\text{Et}_2\text{PhSiH}$  with  $\text{Ph}_3\text{C}^+[\text{CHB}_{11}\text{H}_5\text{Br}_6]^-$ .

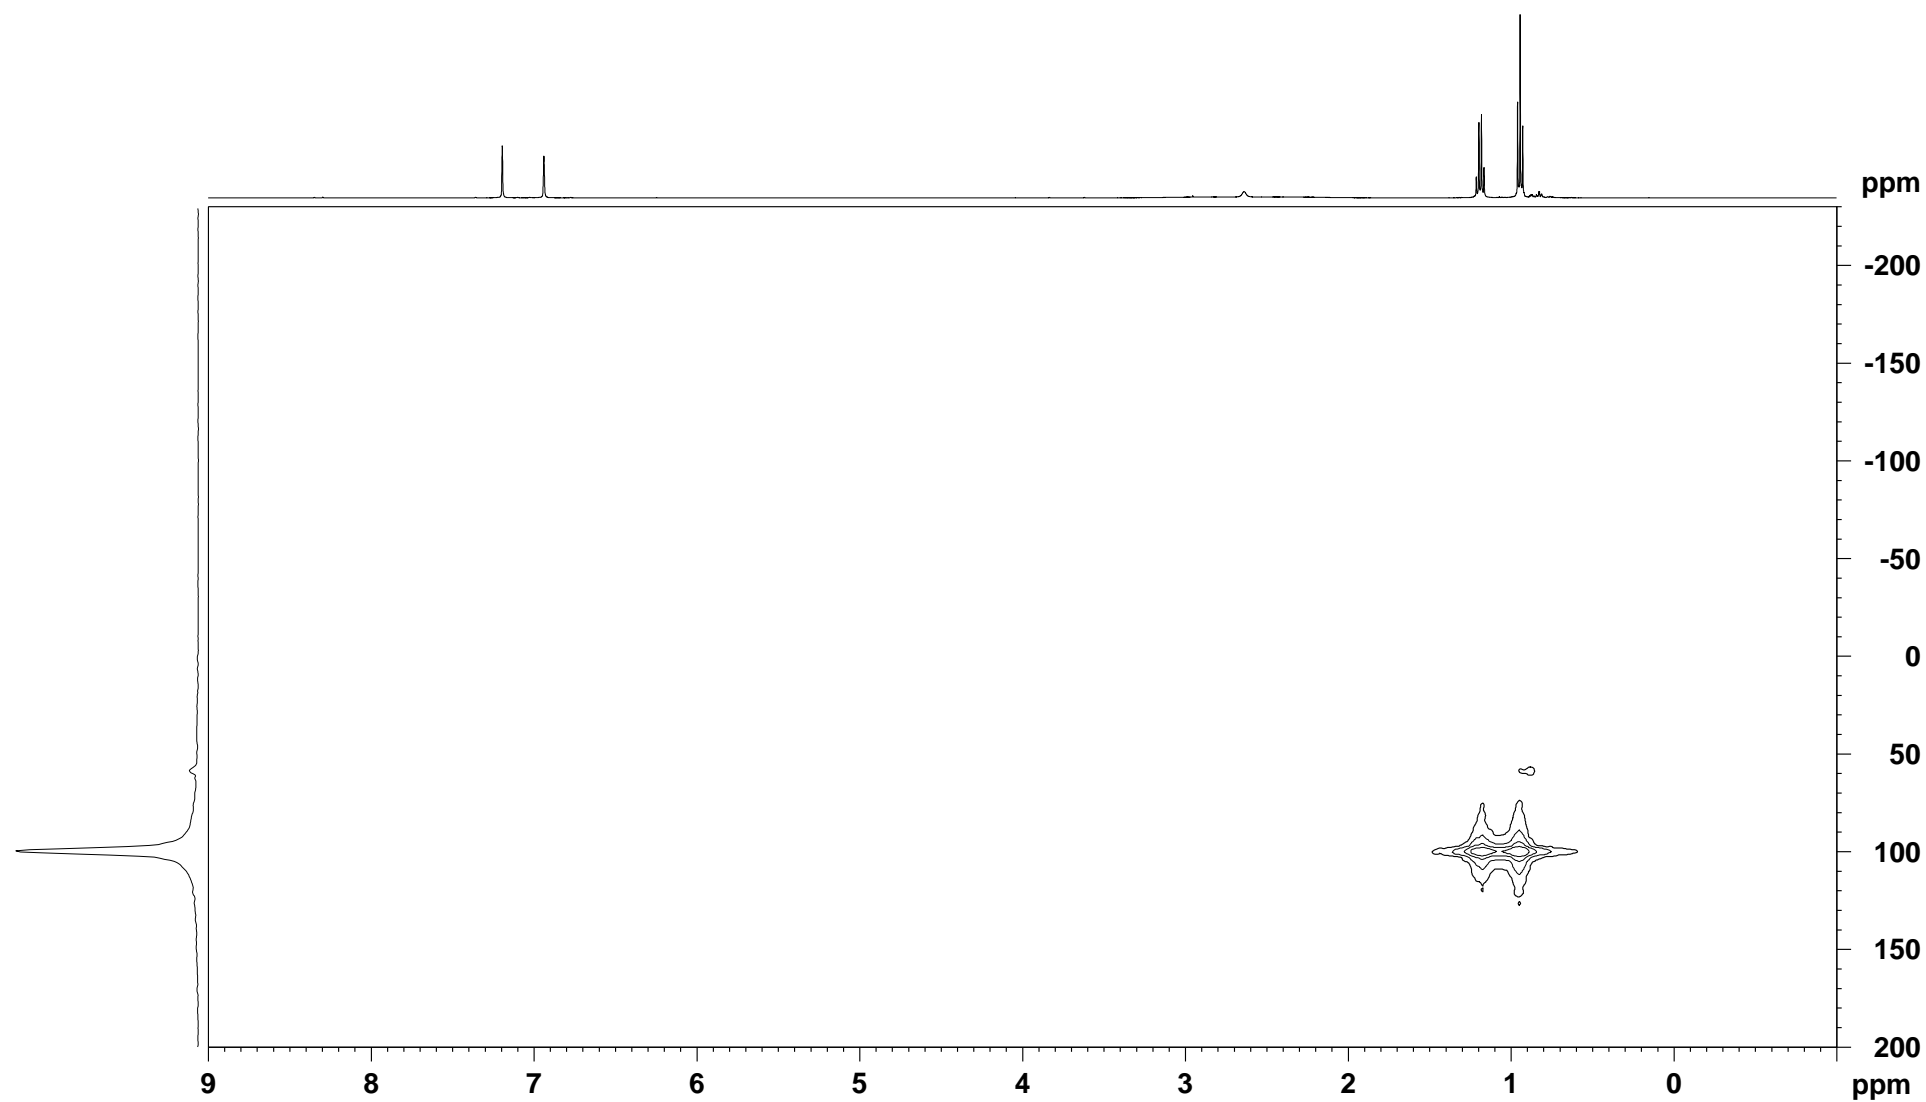

**Figure S42.**  $^1\text{H}$  NMR spectrum (500 MHz,  $o\text{-Cl}_2\text{C}_6\text{D}_4$ , 298 K) of  $\text{Et}_3\text{Si}^+[\text{CHB}_{11}\text{H}_5\text{Br}_6]^-$  with small amounts of  $\text{Et}_2\text{PhSi}^+[\text{CHB}_{11}\text{H}_5\text{Br}_6]^-$  from the reaction of  $\text{Et}_2\text{PhSiH}$  with  $\text{Ph}_3\text{C}^+[\text{CHB}_{11}\text{H}_5\text{Br}_6]^-$  (reaction performed with 2.0 equiv of  $\text{Et}_2\text{PhSiH}$ ; stopped after 18 h reaction time; + = *n*-pentane).

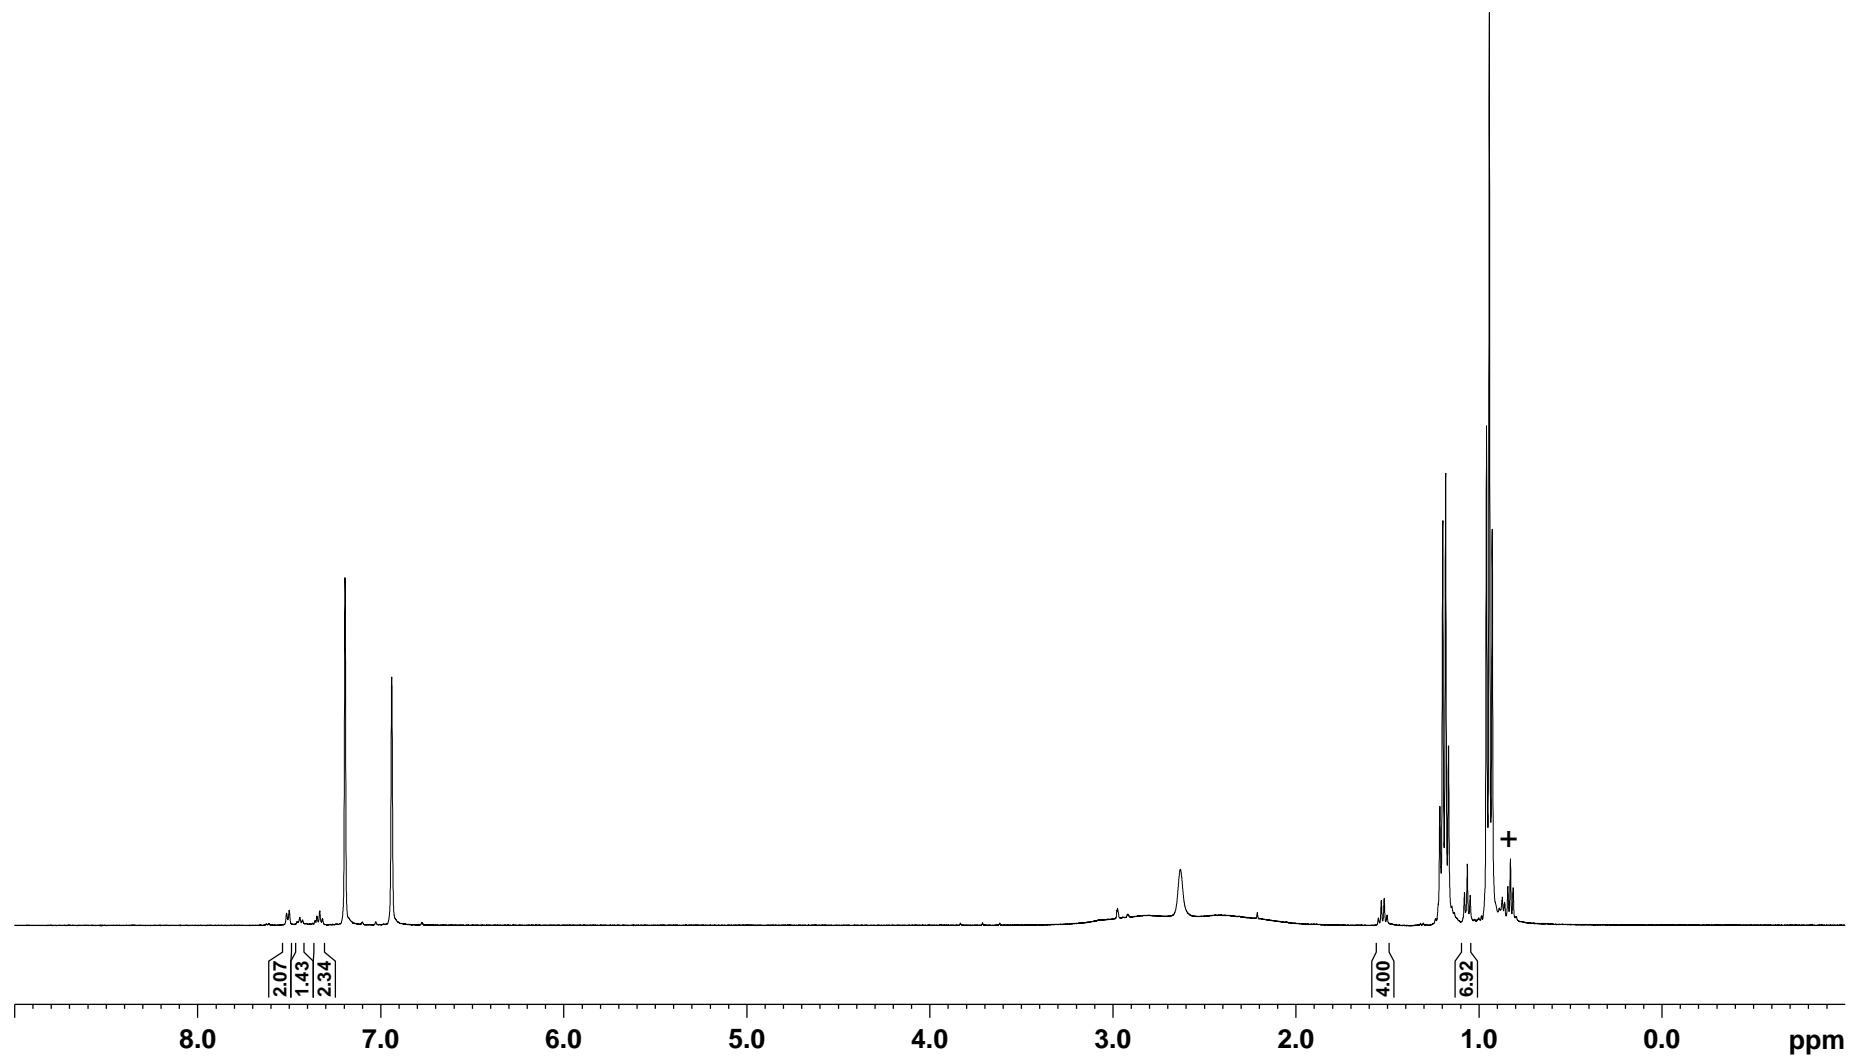

**Figure S43.**  $^1\text{H}/^{29}\text{Si}$  HMQC NMR spectrum (500/99 MHz,  $o\text{-Cl}_2\text{C}_6\text{D}_4$ , 298 K, optimized for  $J = 7$  Hz) of  $\text{Et}_3\text{Si}^+[\text{CHB}_{11}\text{H}_5\text{Br}_6]^-$  with small amounts of  $\text{Et}_2\text{PhSi}^+[\text{CHB}_{11}\text{H}_5\text{Br}_6]^-$  from the reaction of  $\text{Et}_2\text{PhSiH}$  with  $\text{Ph}_3\text{C}^+[\text{CHB}_{11}\text{H}_5\text{Br}_6]^-$ .

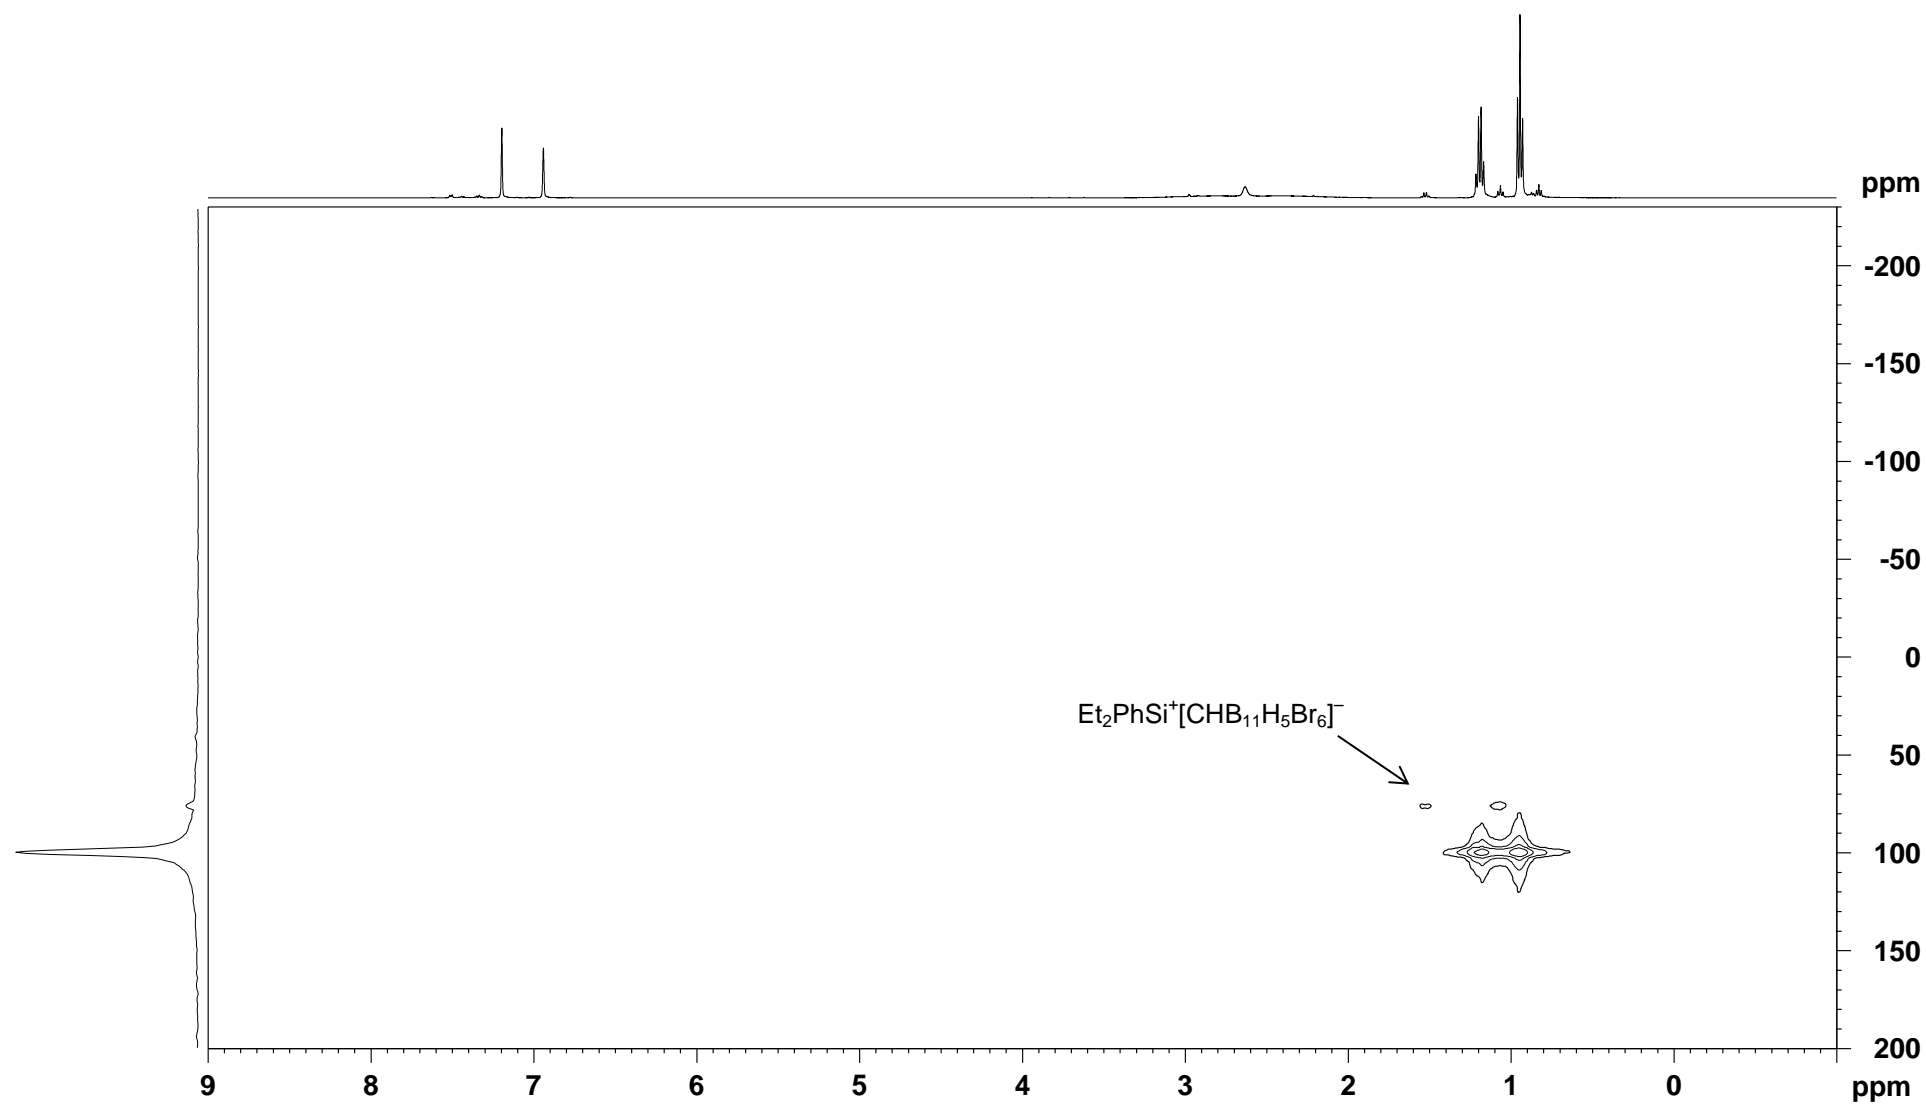



**Figure S44.**  $^1\text{H}$  NMR spectrum (500 MHz,  $\text{o-Cl}_2\text{C}_6\text{D}_4$ , 298 K) of  $\text{Et}_3\text{Si}^+[\text{CHB}_{11}\text{H}_5\text{Br}_6]^-$  from the reaction of  $\text{Et}_3\text{SiH}$  with  $\text{Ph}_3\text{C}^+[\text{CHB}_{11}\text{H}_5\text{Br}_6]^-$  (+ = *n*-pentane, # = impurity).

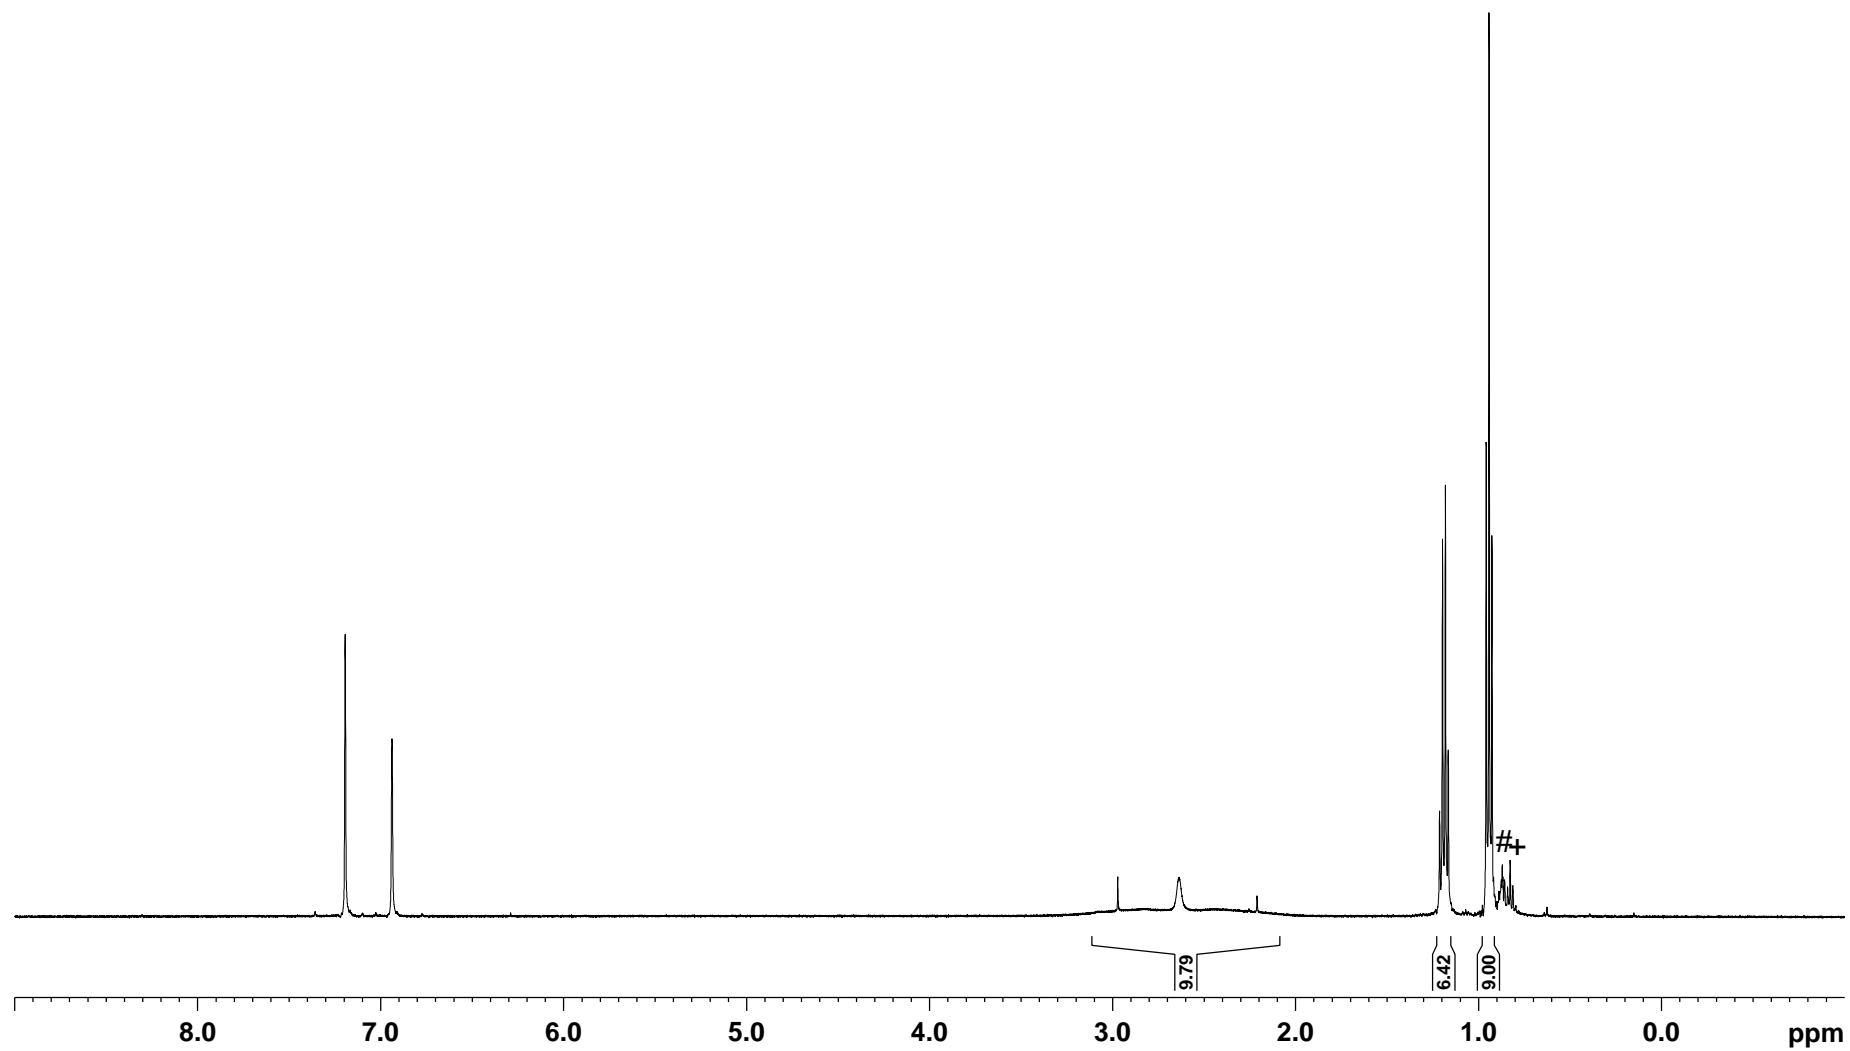

**Figure S45.**  $^1\text{H}/^{29}\text{Si}$  HMQC NMR spectrum (500/99 MHz,  $o\text{-Cl}_2\text{C}_6\text{D}_4$ , 298 K, optimized for  $J = 7$  Hz) of  $\text{Et}_3\text{Si}^+[\text{CHB}_{11}\text{H}_5\text{Br}_6]^-$  from the reaction of  $\text{Et}_3\text{SiH}$  with  $\text{Ph}_3\text{C}^+[\text{CHB}_{11}\text{H}_5\text{Br}_6]^-$ .

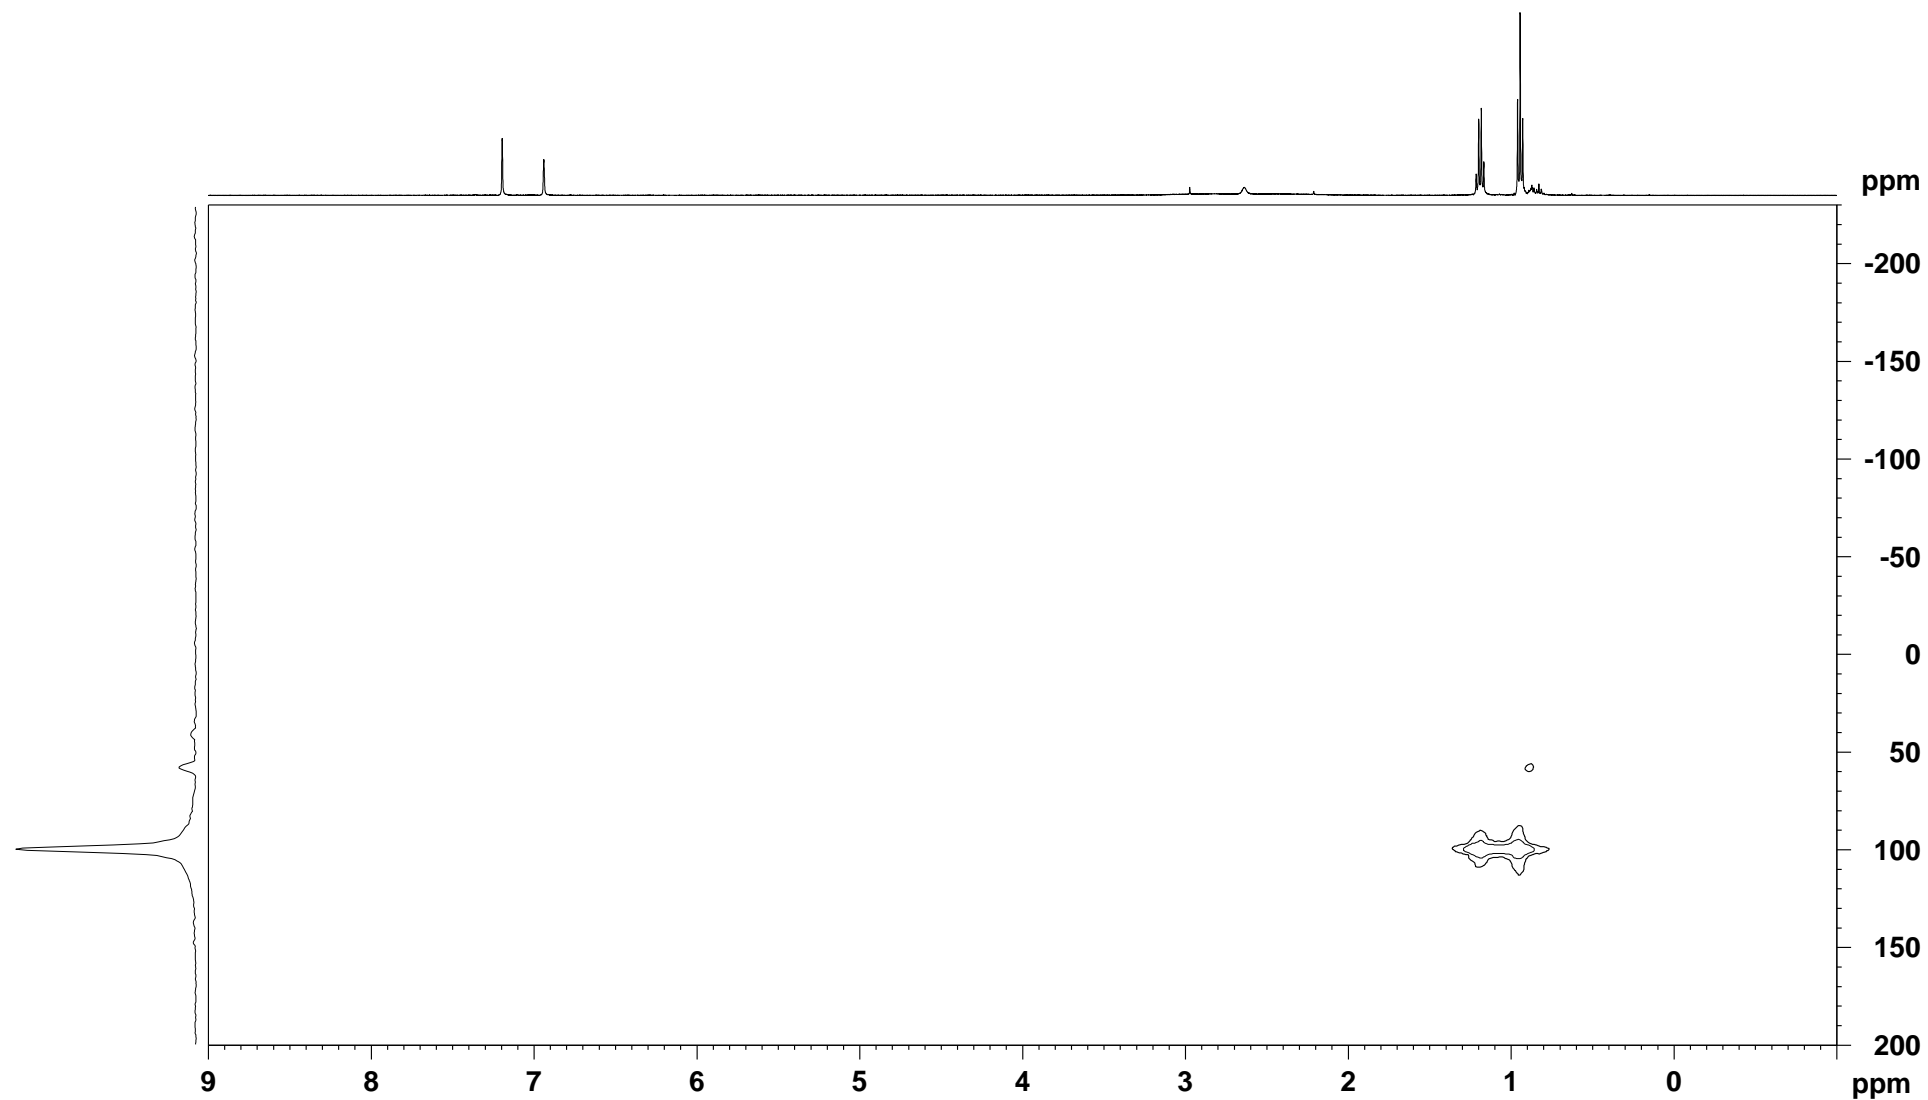

**Figure S46.**  $^1\text{H}$  NMR spectrum (500 MHz,  $\text{o-Cl}_2\text{C}_6\text{D}_4$ , 298 K) of  $i\text{Pr}_2\text{PhSi}^+[\text{CHB}_{11}\text{H}_5\text{Br}_6]^-$  from the reaction of  $i\text{Pr}_2\text{PhSiH}$  with  $\text{Ph}_3\text{C}^+[\text{CHB}_{11}\text{H}_5\text{Br}_6]^-$  (+ =  $n$ -pentane).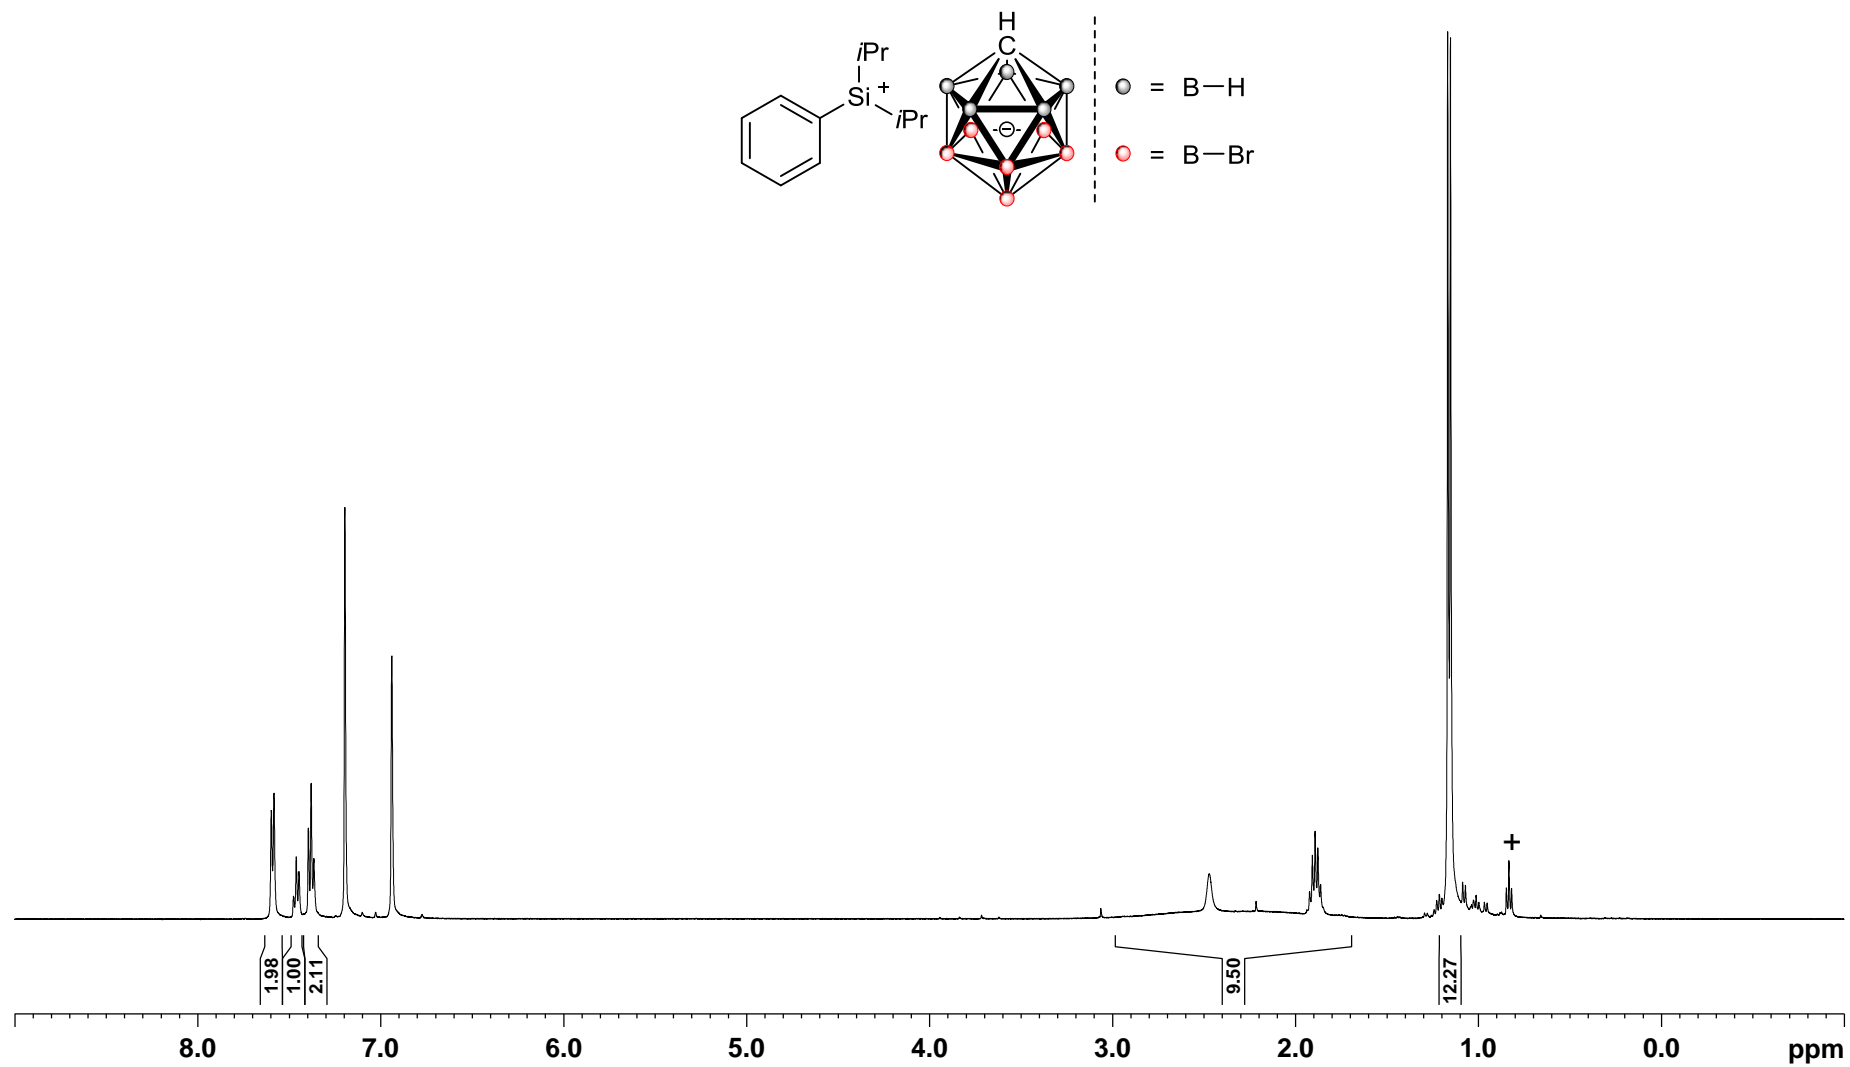

**Figure S47.**  $^{11}\text{B}$  NMR spectrum (161 MHz,  $o\text{-Cl}_2\text{C}_6\text{D}_4$ , 298 K) of  $i\text{Pr}_2\text{PhSi}^+[\text{CHB}_{11}\text{H}_5\text{Br}_6]^-$  from the reaction of  $i\text{Pr}_2\text{PhSiH}$  with  $\text{Ph}_3\text{C}^+[\text{CHB}_{11}\text{H}_5\text{Br}_6]^-$ .

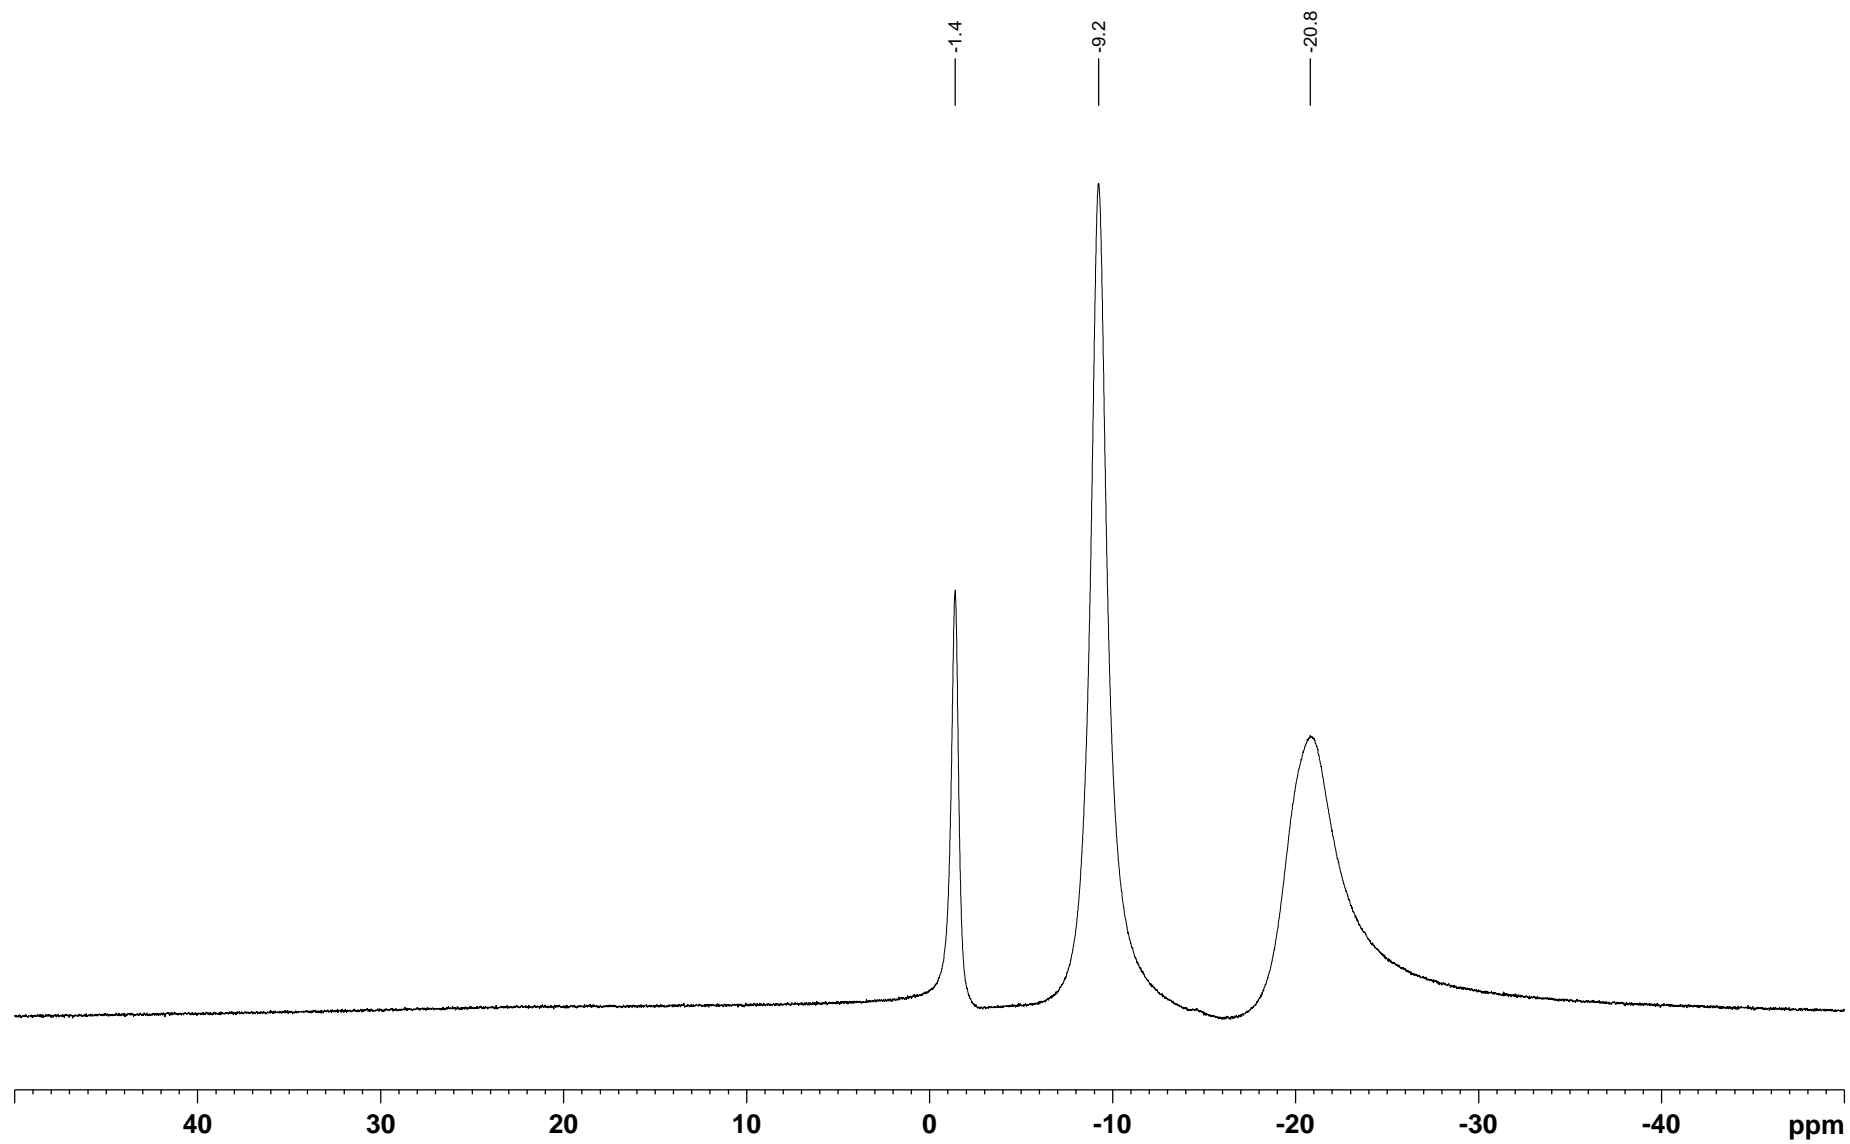

**Figure S48.**  $^{13}\text{C}\{^1\text{H}\}$  NMR spectrum (126 MHz,  $o\text{-Cl}_2\text{C}_6\text{D}_4$ , 298 K) of  $i\text{Pr}_2\text{PhSi}^+[\text{CHB}_{11}\text{H}_5\text{Br}_6]^-$  from the reaction of  $i\text{Pr}_2\text{PhSiH}$  with  $\text{Ph}_3\text{C}^+[\text{CHB}_{11}\text{H}_5\text{Br}_6]^-$  (+ = *n*-pentane).

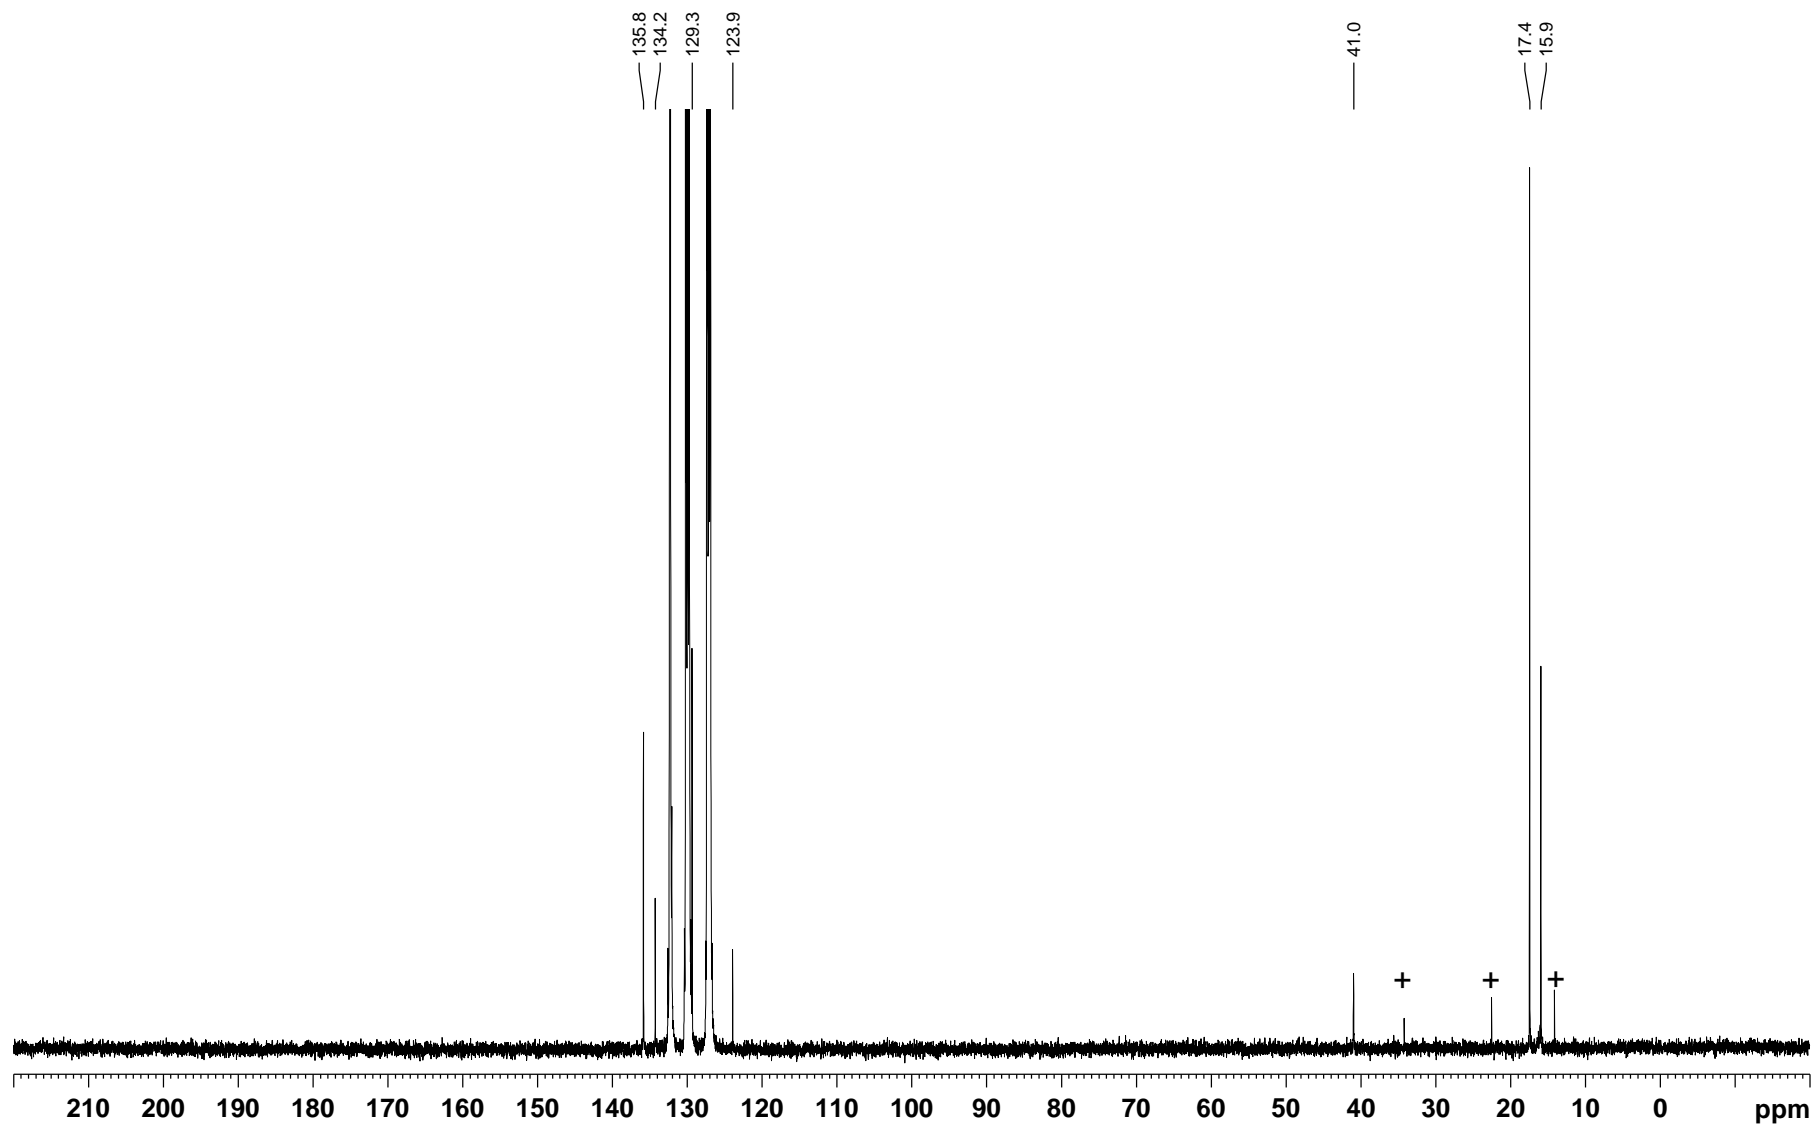

**Figure S49.**  $^1\text{H}/^{29}\text{Si}$  HMQC NMR spectrum (500/99 MHz,  $o\text{-Cl}_2\text{C}_6\text{D}_4$ , 298 K, optimized for  $J = 7$  Hz) of  $i\text{Pr}_2\text{PhSi}^+[\text{CHB}_{11}\text{H}_5\text{Br}_6]^-$  from the reaction of  $i\text{Pr}_2\text{PhSiH}$  with  $\text{Ph}_3\text{C}^+[\text{CHB}_{11}\text{H}_5\text{Br}_6]^-$ .

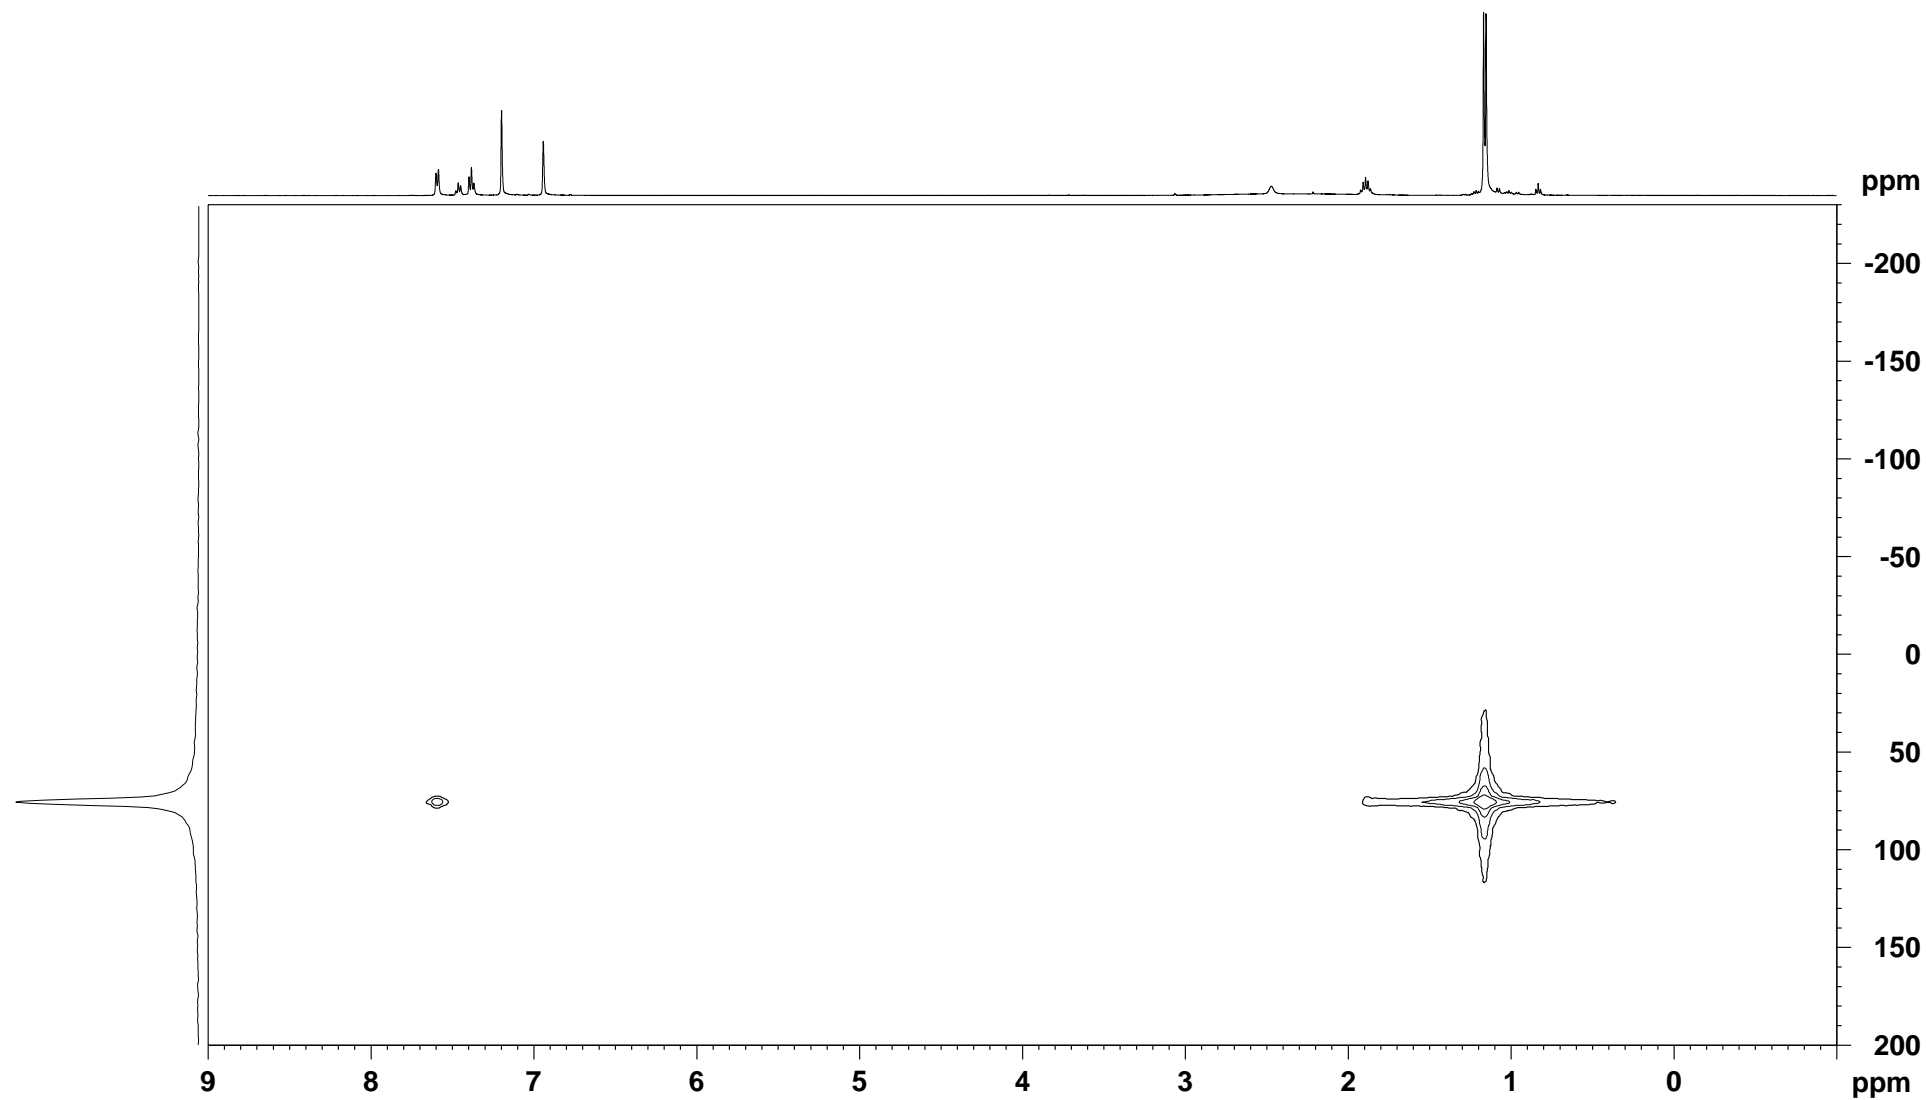

**Figure S50.**  $^1\text{H}$  NMR spectrum (500 MHz,  $\text{o-Cl}_2\text{C}_6\text{D}_4$ , 300 K) of  $\text{Me}_3\text{Si}^+[\text{CHB}_{11}\text{H}_5\text{Br}_6]^-$  from the reaction of  $\text{Me}_2\text{BnSiH}$  with  $\text{Ph}_3\text{C}^+[\text{CHB}_{11}\text{H}_5\text{Br}_6]^-$  (+ = *n*-pentane, # = impurity).

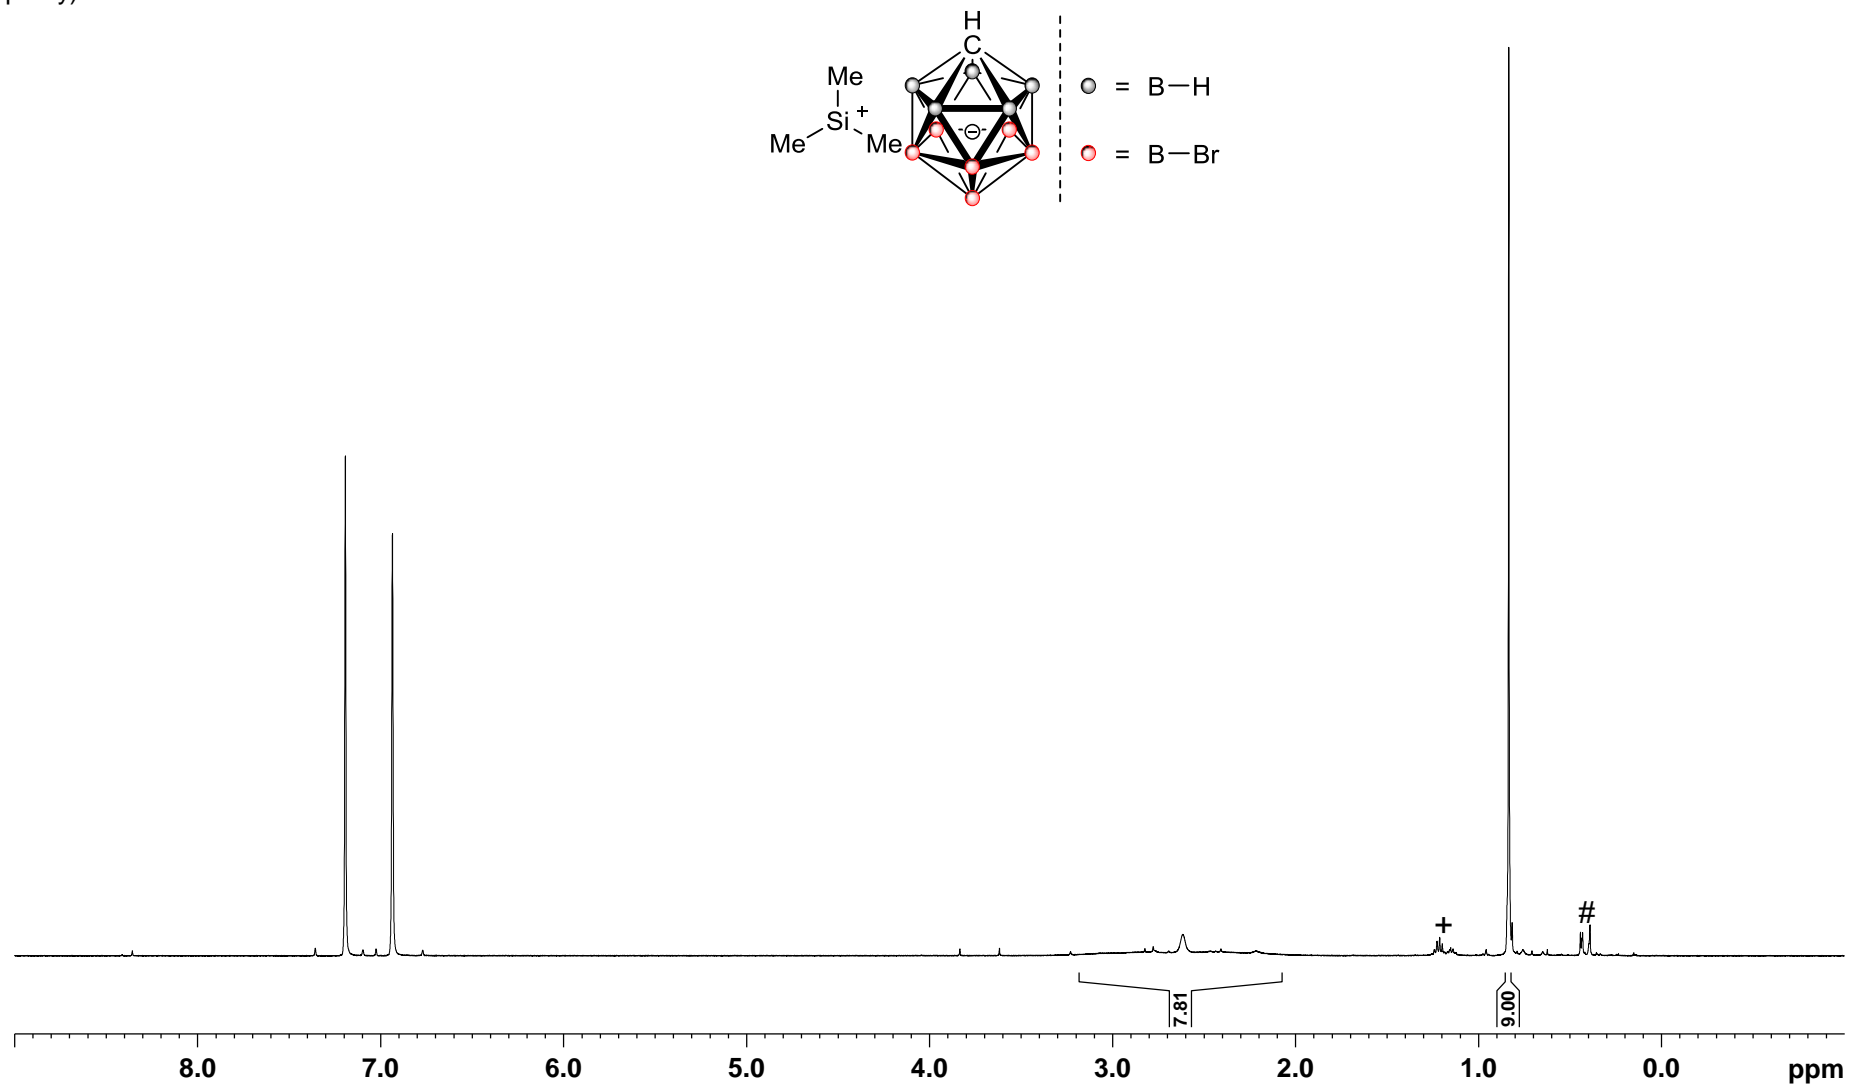

**Figure S51.**  $^1\text{H}/^{29}\text{Si}$  HMQC NMR spectrum (500/99 MHz,  $o\text{-Cl}_2\text{C}_6\text{D}_4$ , 300 K, optimized for  $J = 7$  Hz) of  $\text{Me}_3\text{Si}^+[\text{CHB}_{11}\text{H}_5\text{Br}_6]^-$  from the reaction of  $\text{Me}_2\text{BnSiH}$  with  $\text{Ph}_3\text{C}^+[\text{CHB}_{11}\text{H}_5\text{Br}_6]^-$ .

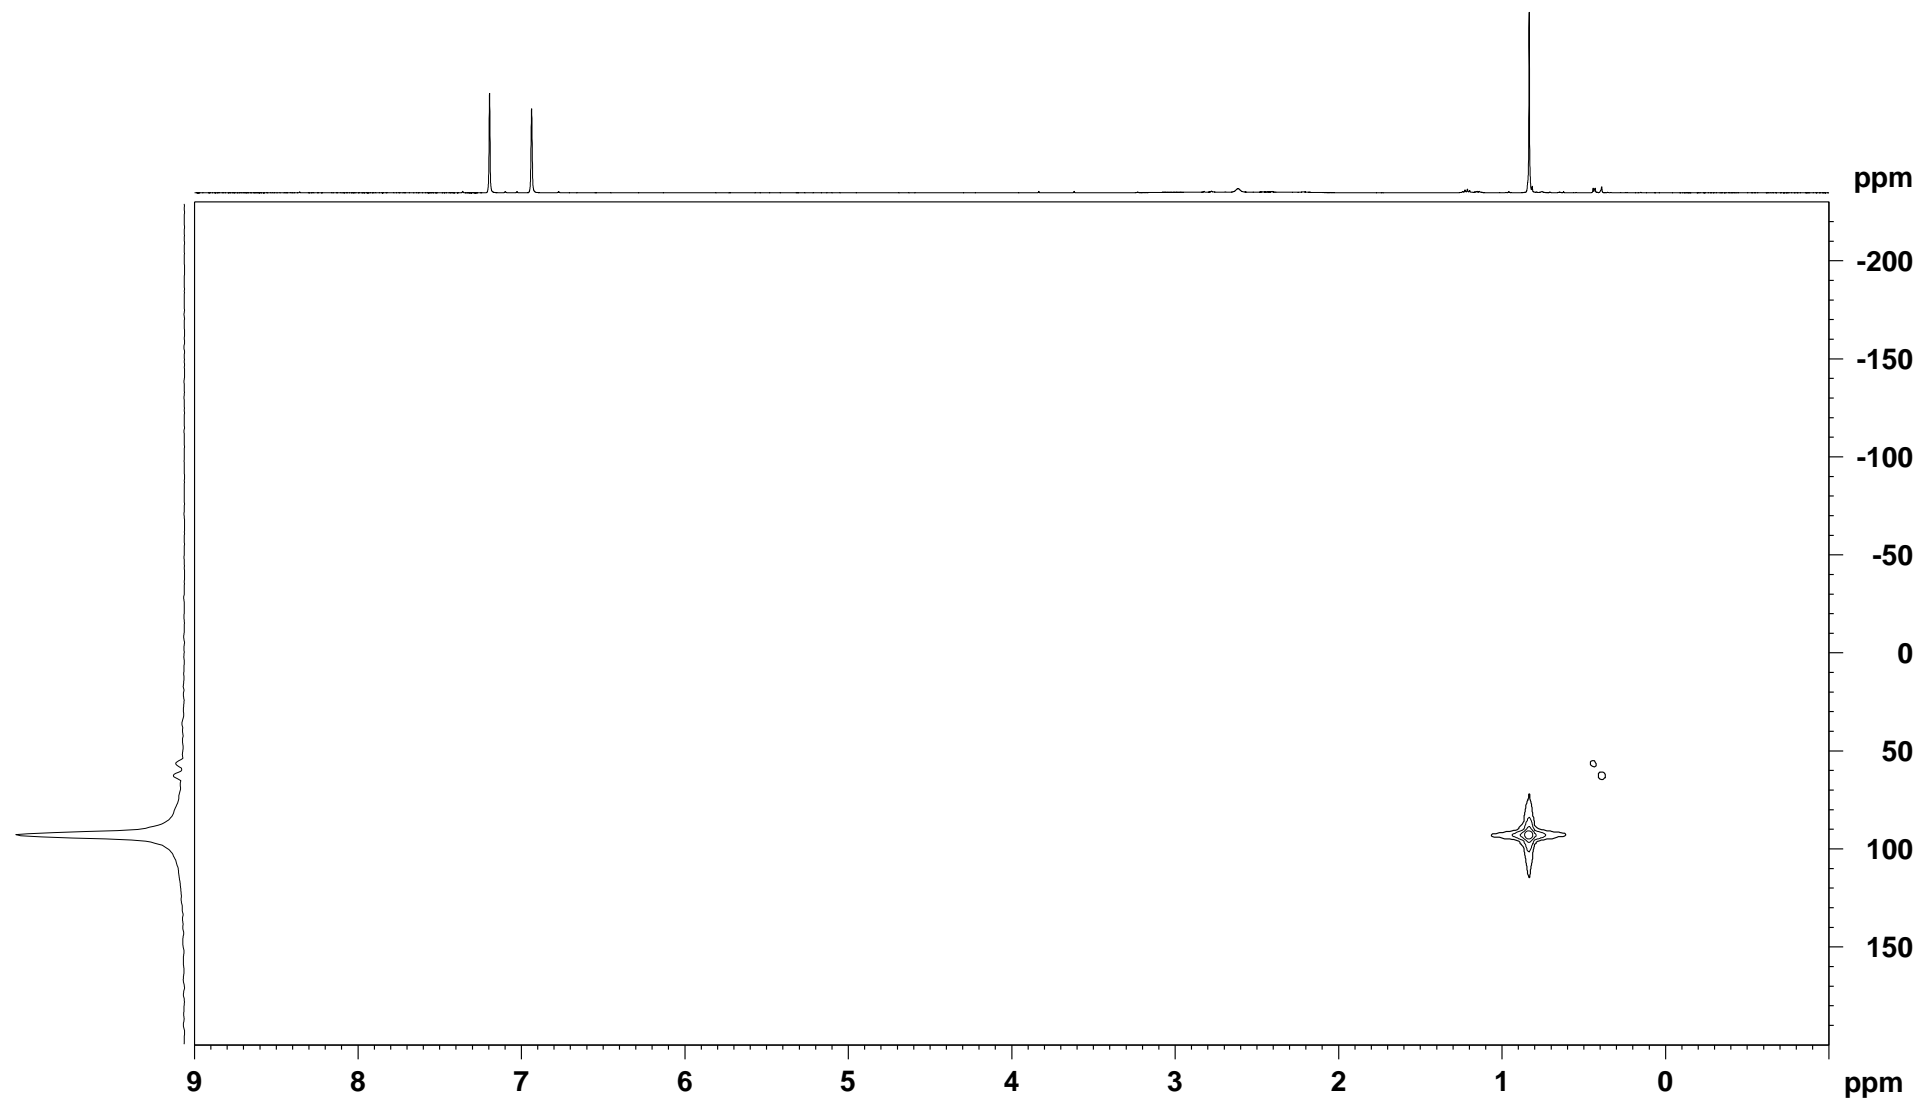



**Figure S52.**  $^1\text{H}$  NMR spectrum (500 MHz,  $o\text{-Cl}_2\text{C}_6\text{D}_4$ , 300 K) of  $\text{Me}_2t\text{BuSi}^+[\text{CHB}_{11}\text{H}_5\text{Br}_6]^-$  from the reaction of  $\text{Me}_2t\text{BuSiH}$  with  $\text{Ph}_3\text{C}^+[\text{CHB}_{11}\text{H}_5\text{Br}_6]^-$ .

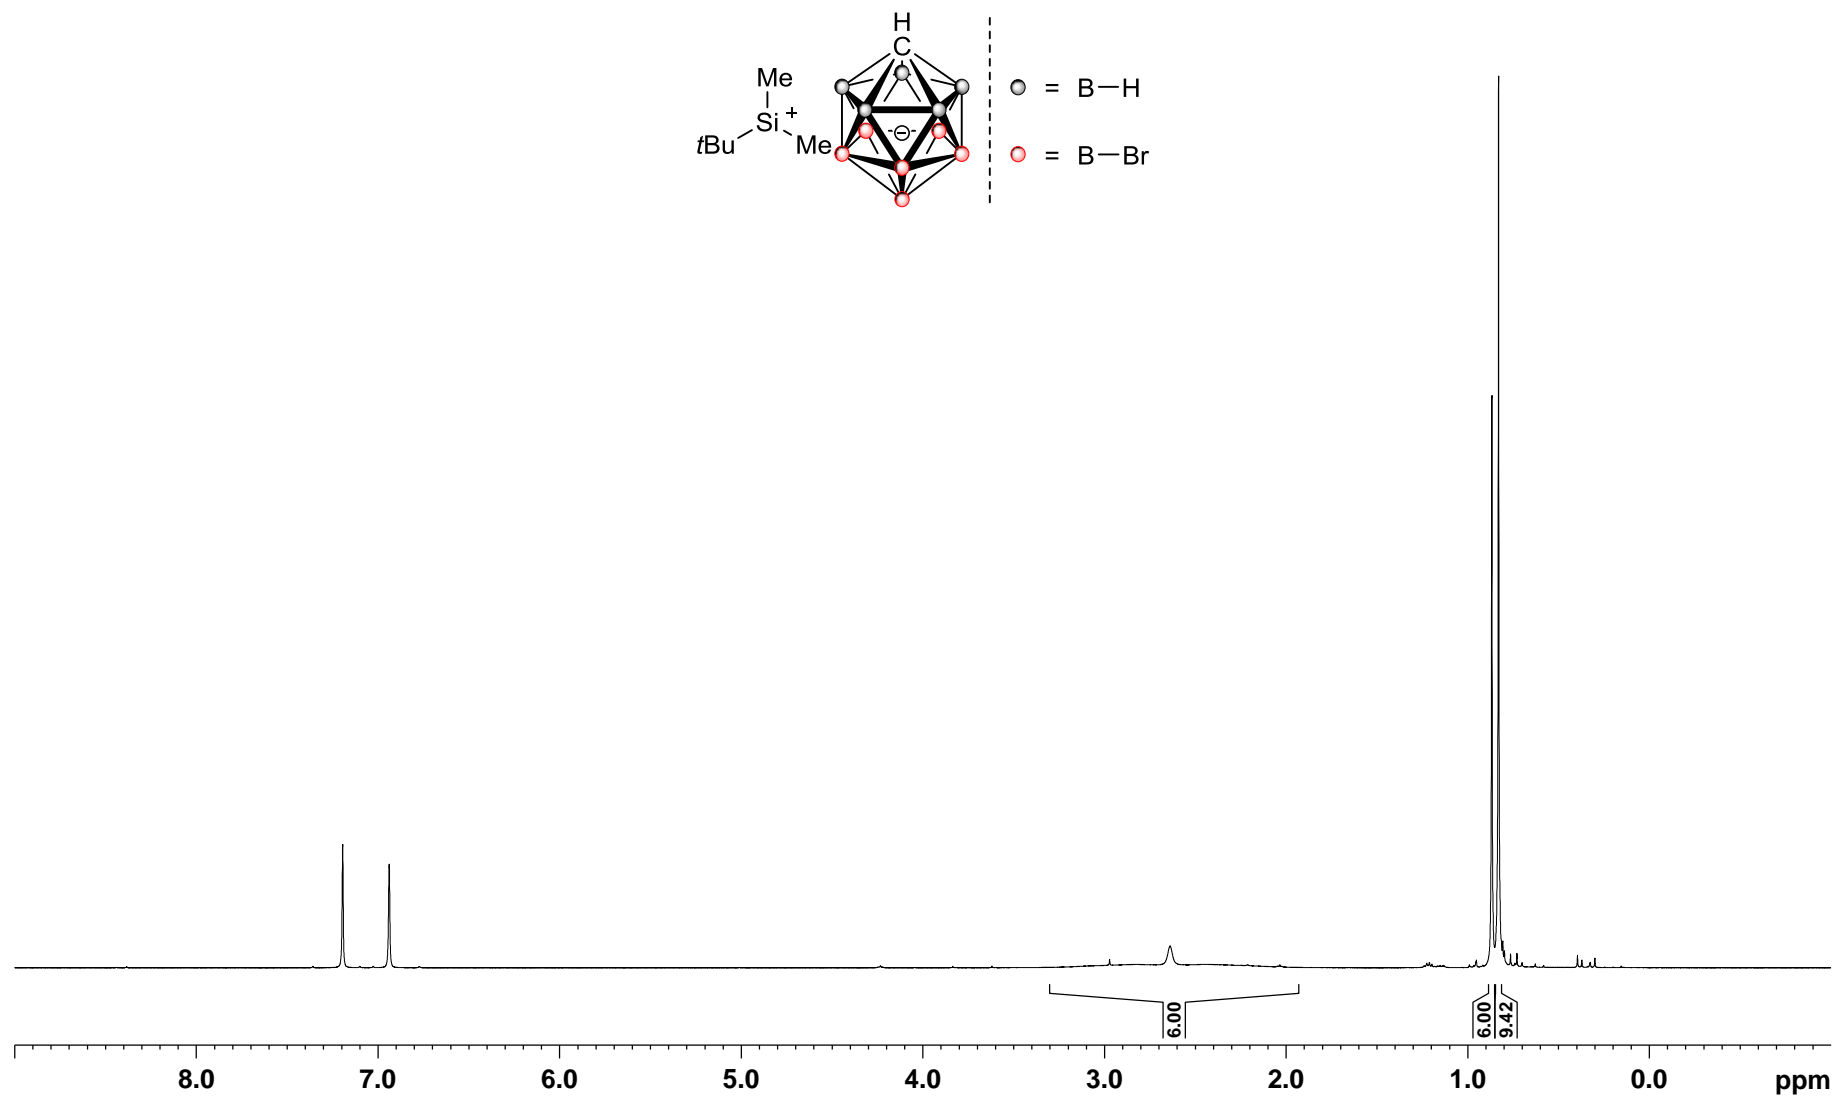

**Figure S53.**  $^{11}\text{B}$  NMR spectrum (161 MHz,  $o\text{-Cl}_2\text{C}_6\text{D}_4$ , 300 K) of  $\text{Me}_2\text{tBuSi}^+[\text{CHB}_{11}\text{H}_5\text{Br}_6]^-$  from the reaction of  $\text{Me}_2\text{tBuSiH}$  with  $\text{Ph}_3\text{C}^+[\text{CHB}_{11}\text{H}_5\text{Br}_6]^-$ .

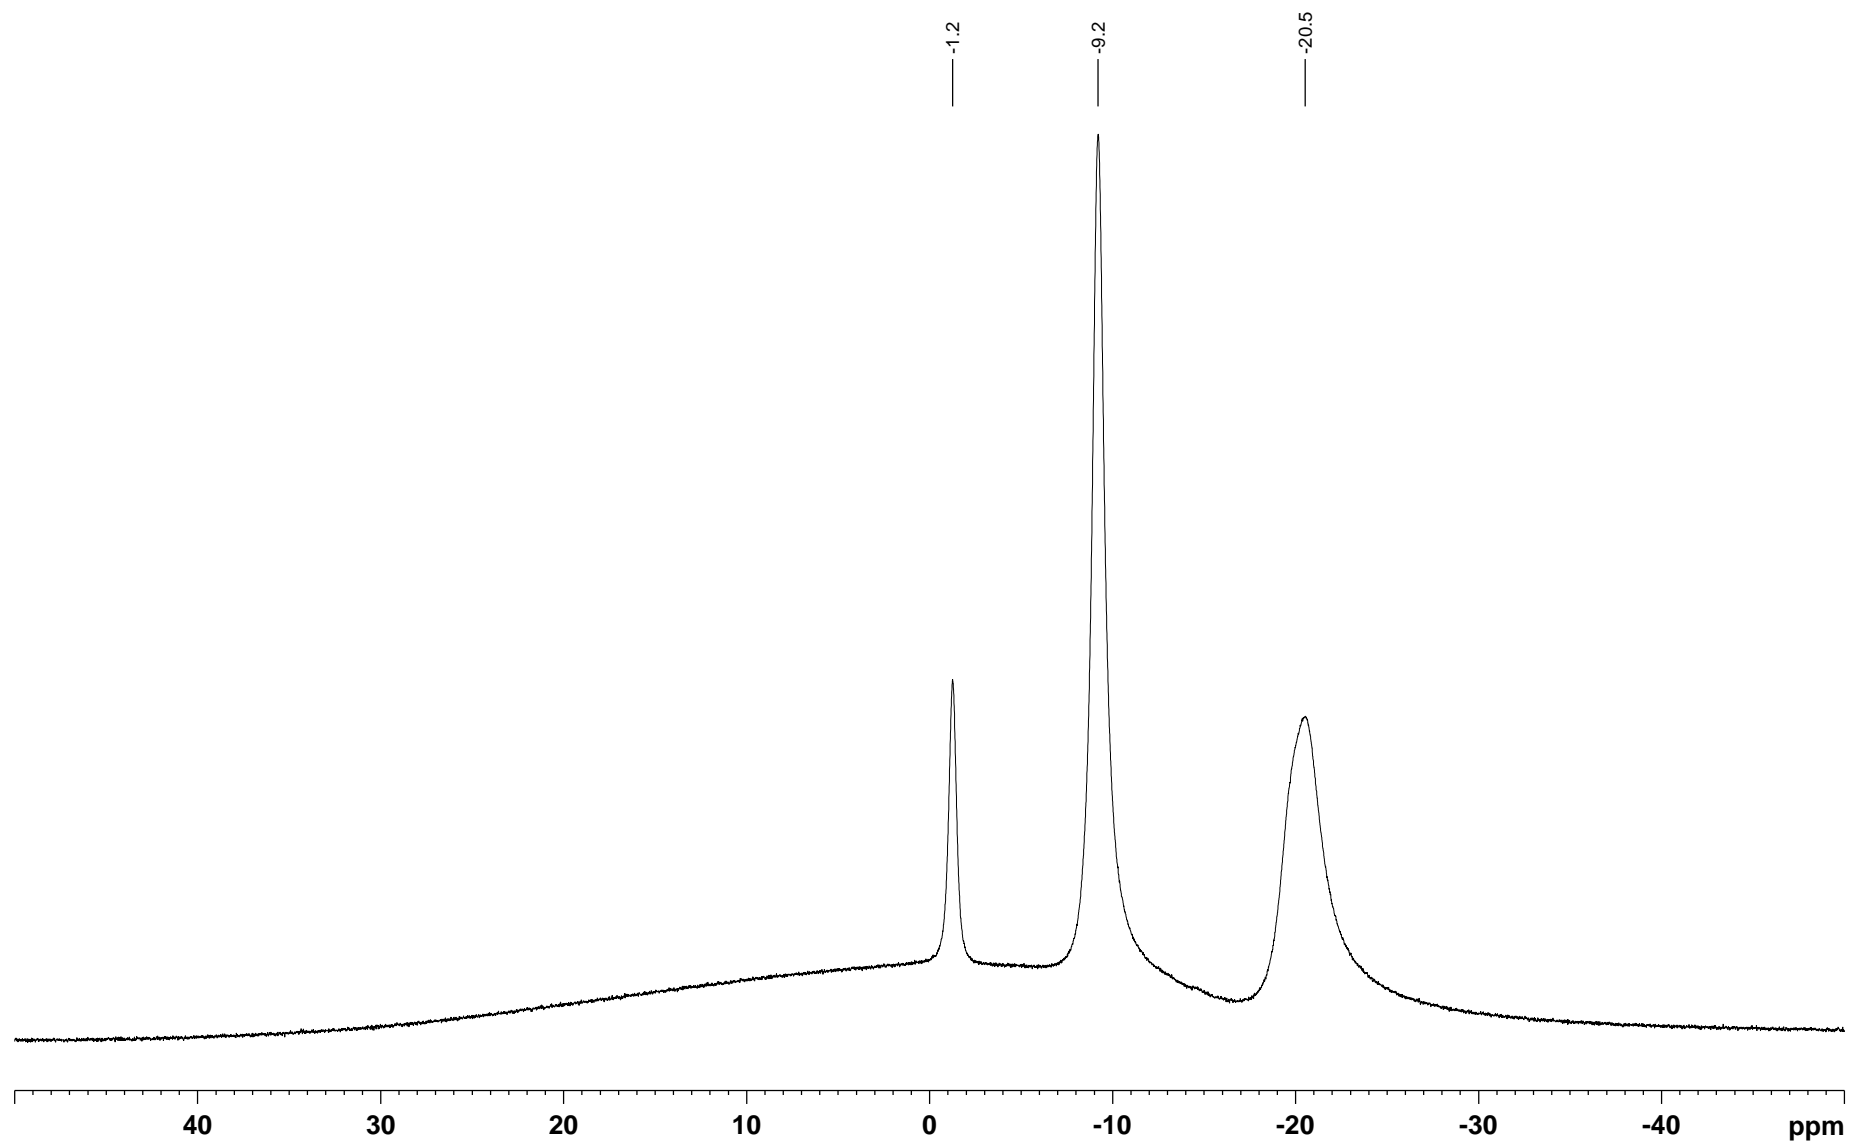

**Figure S54.**  $^{13}\text{C}\{^1\text{H}\}$  NMR spectrum (126 MHz,  $o\text{-Cl}_2\text{C}_6\text{D}_4$ , 300 K) of  $\text{Me}_2\text{tBuSi}^+[\text{CHB}_{11}\text{H}_5\text{Br}_6]^-$  from the reaction of  $\text{Me}_2\text{tBuSiH}$  with  $\text{Ph}_3\text{C}^+[\text{CHB}_{11}\text{H}_5\text{Br}_6]^-$ .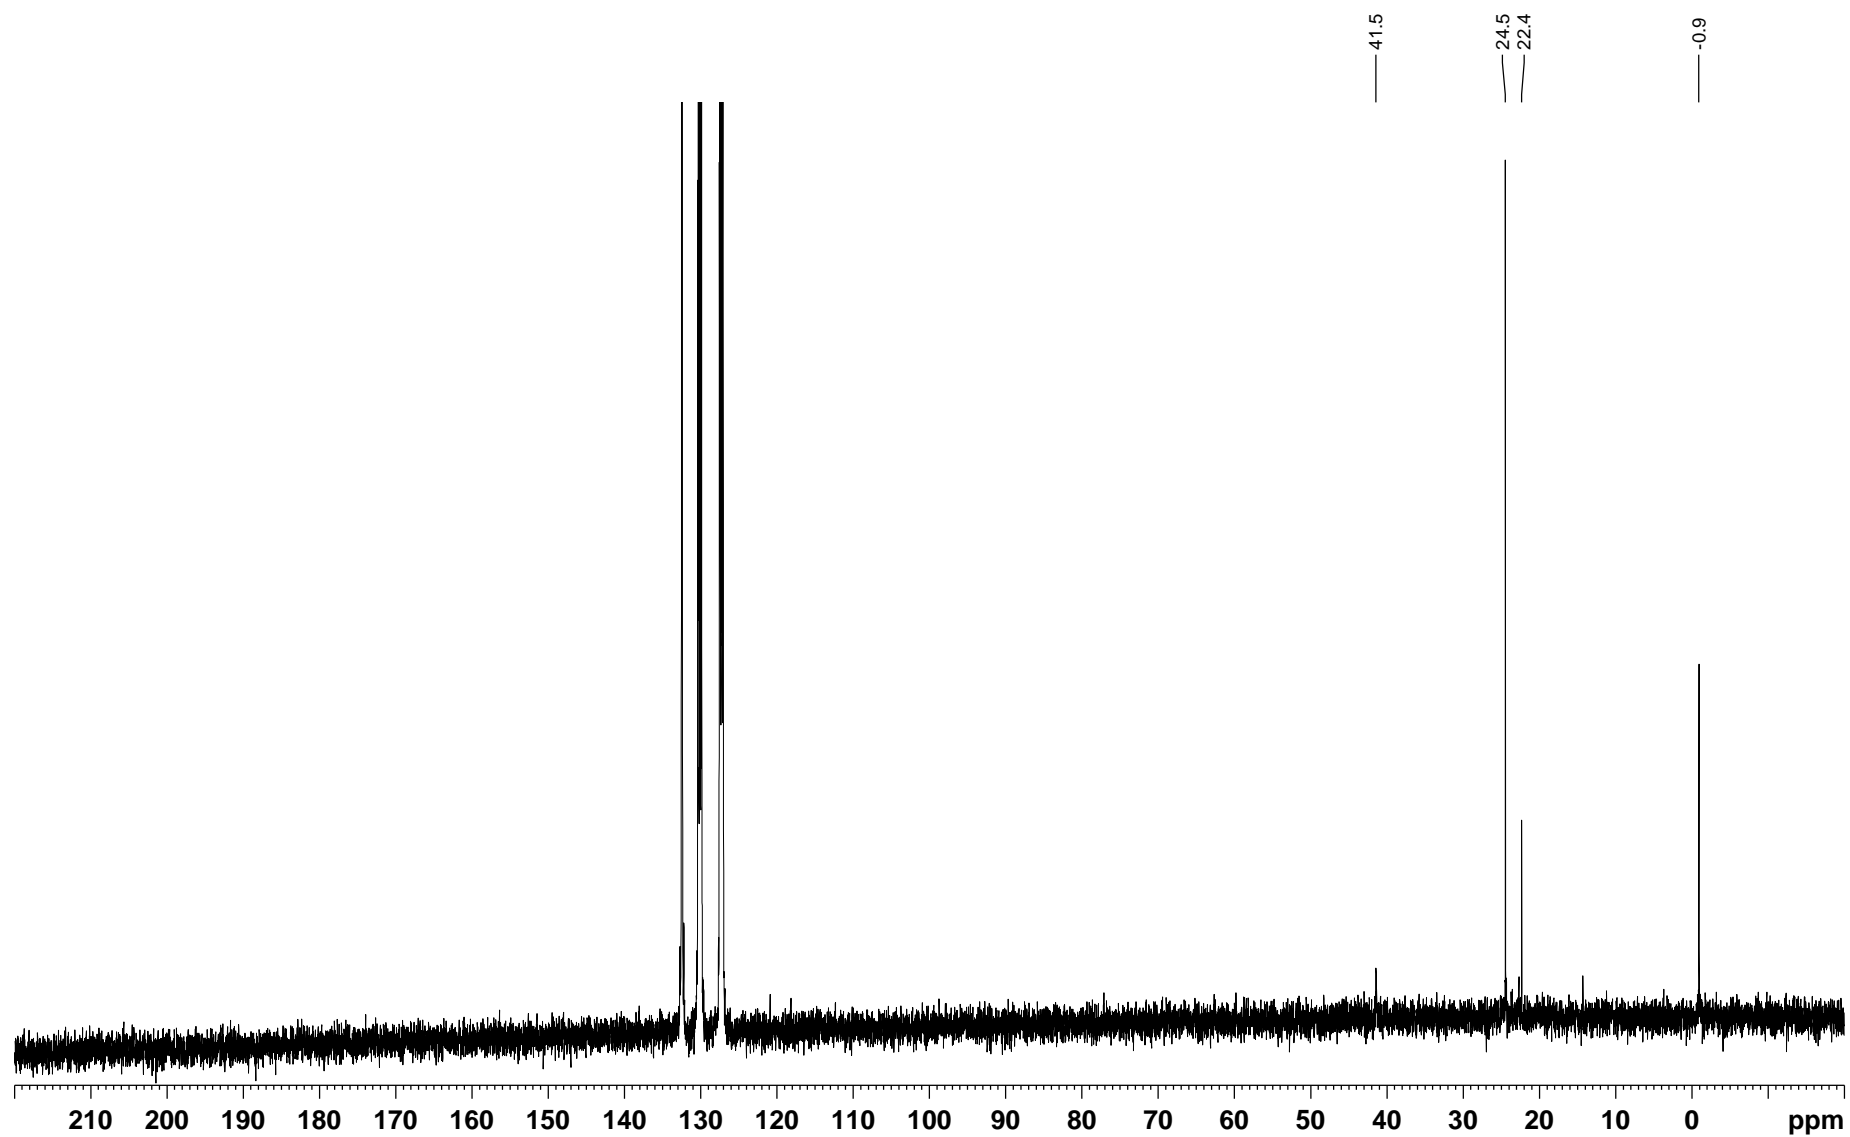

**Figure S55.**  $^1\text{H}/^{29}\text{Si}$  HMQC NMR spectrum (500/99 MHz,  $o\text{-Cl}_2\text{C}_6\text{D}_4$ , 300 K, optimized for  $J = 7$  Hz) of  $\text{Me}_2\text{tBuSi}^+[\text{CHB}_{11}\text{H}_5\text{Br}_6]^-$  from the reaction of  $\text{Me}_2\text{tBuSiH}$  with  $\text{Ph}_3\text{C}^+[\text{CHB}_{11}\text{H}_5\text{Br}_6]^-$ .

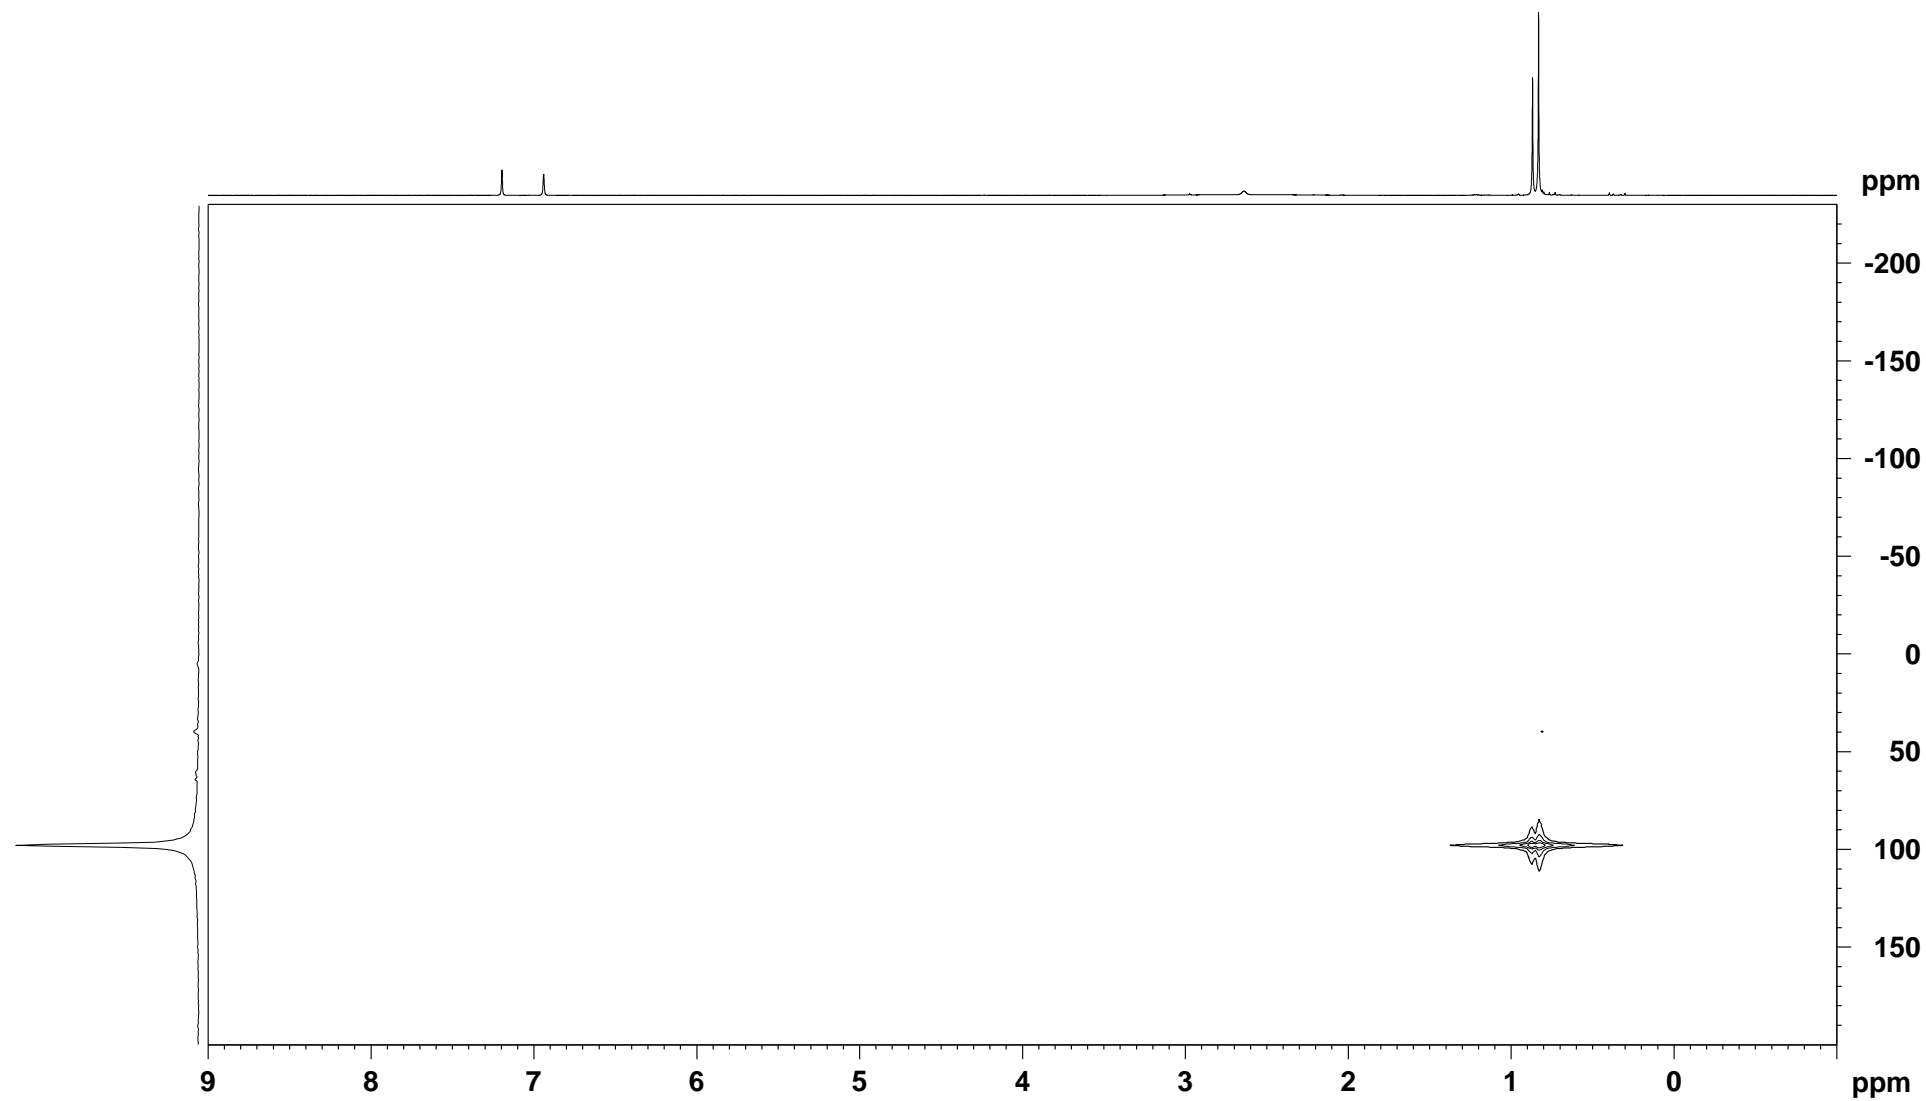

**Figure S56.**  $^1\text{H}$  NMR spectrum (700 MHz,  $o\text{-Cl}_2\text{C}_6\text{D}_4$ , 298 K) of  $\text{Me}_3\text{Si}^+[\text{CHB}_{11}\text{H}_5\text{Br}_6]^-$  with small amounts of  $\text{Me}_2\text{PhSi}^+[\text{CHB}_{11}\text{H}_5\text{Br}_6]^-$  from the reaction of  $\text{Me}_2\text{PhSiH}$  with  $\text{Ph}_3\text{C}^+[\text{CHB}_{11}\text{H}_5\text{Br}_6]^-$  (stopped after 10 min reaction time; \* = toluene, # =  $\text{Me}_2\text{PhSi}^+[\text{CHB}_{11}\text{H}_5\text{Br}_6]^-$ ).

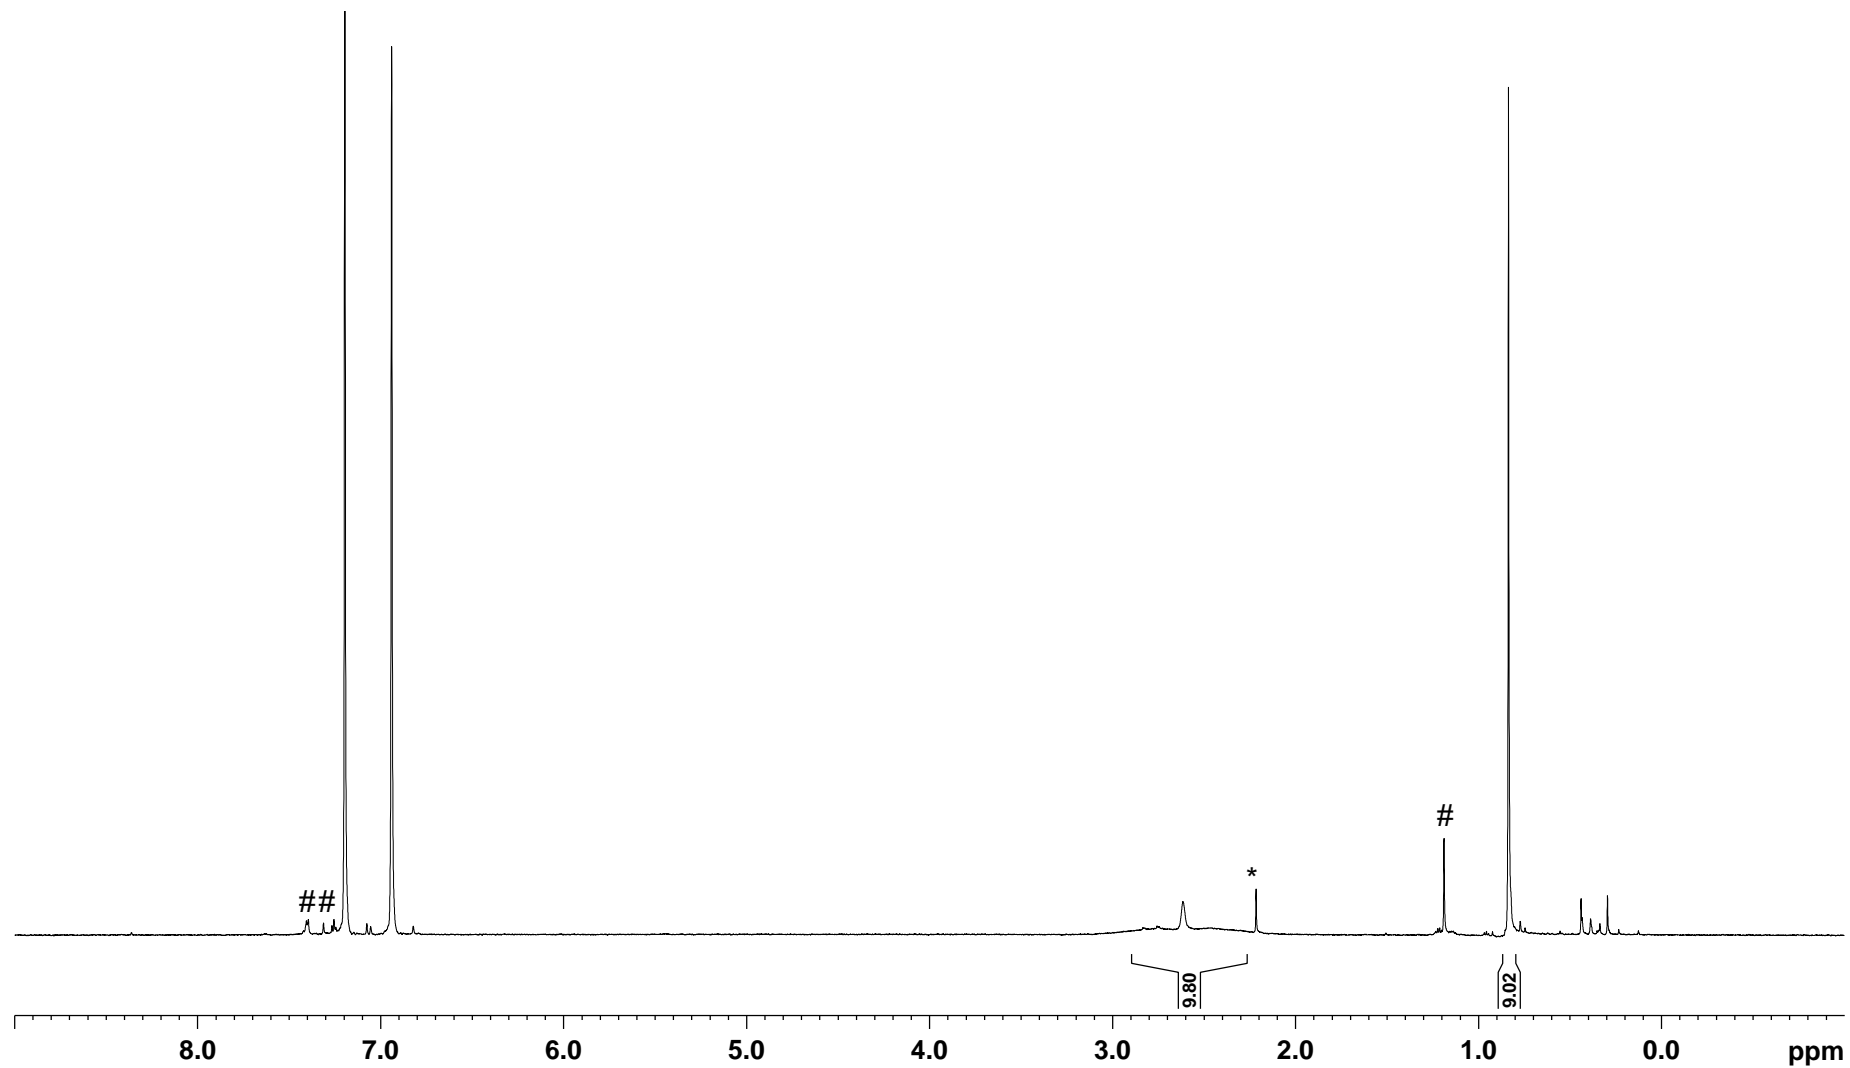

**Figure S57.**  $^1\text{H}/^{29}\text{Si}$  HMQC NMR spectrum (700/139 MHz,  $o\text{-Cl}_2\text{C}_6\text{D}_4$ , 298 K, optimized for  $J = 7$  Hz) of  $\text{Me}_3\text{Si}^+[\text{CHB}_{11}\text{H}_5\text{Br}_6]^-$  with small amounts of  $\text{Me}_2\text{PhSi}^+[\text{CHB}_{11}\text{H}_5\text{Br}_6]^-$  from the reaction of  $\text{Me}_2\text{PhSiH}$  with  $\text{Ph}_3\text{C}^+[\text{CHB}_{11}\text{H}_5\text{Br}_6]^-$  (stopped after 10 min reaction time).

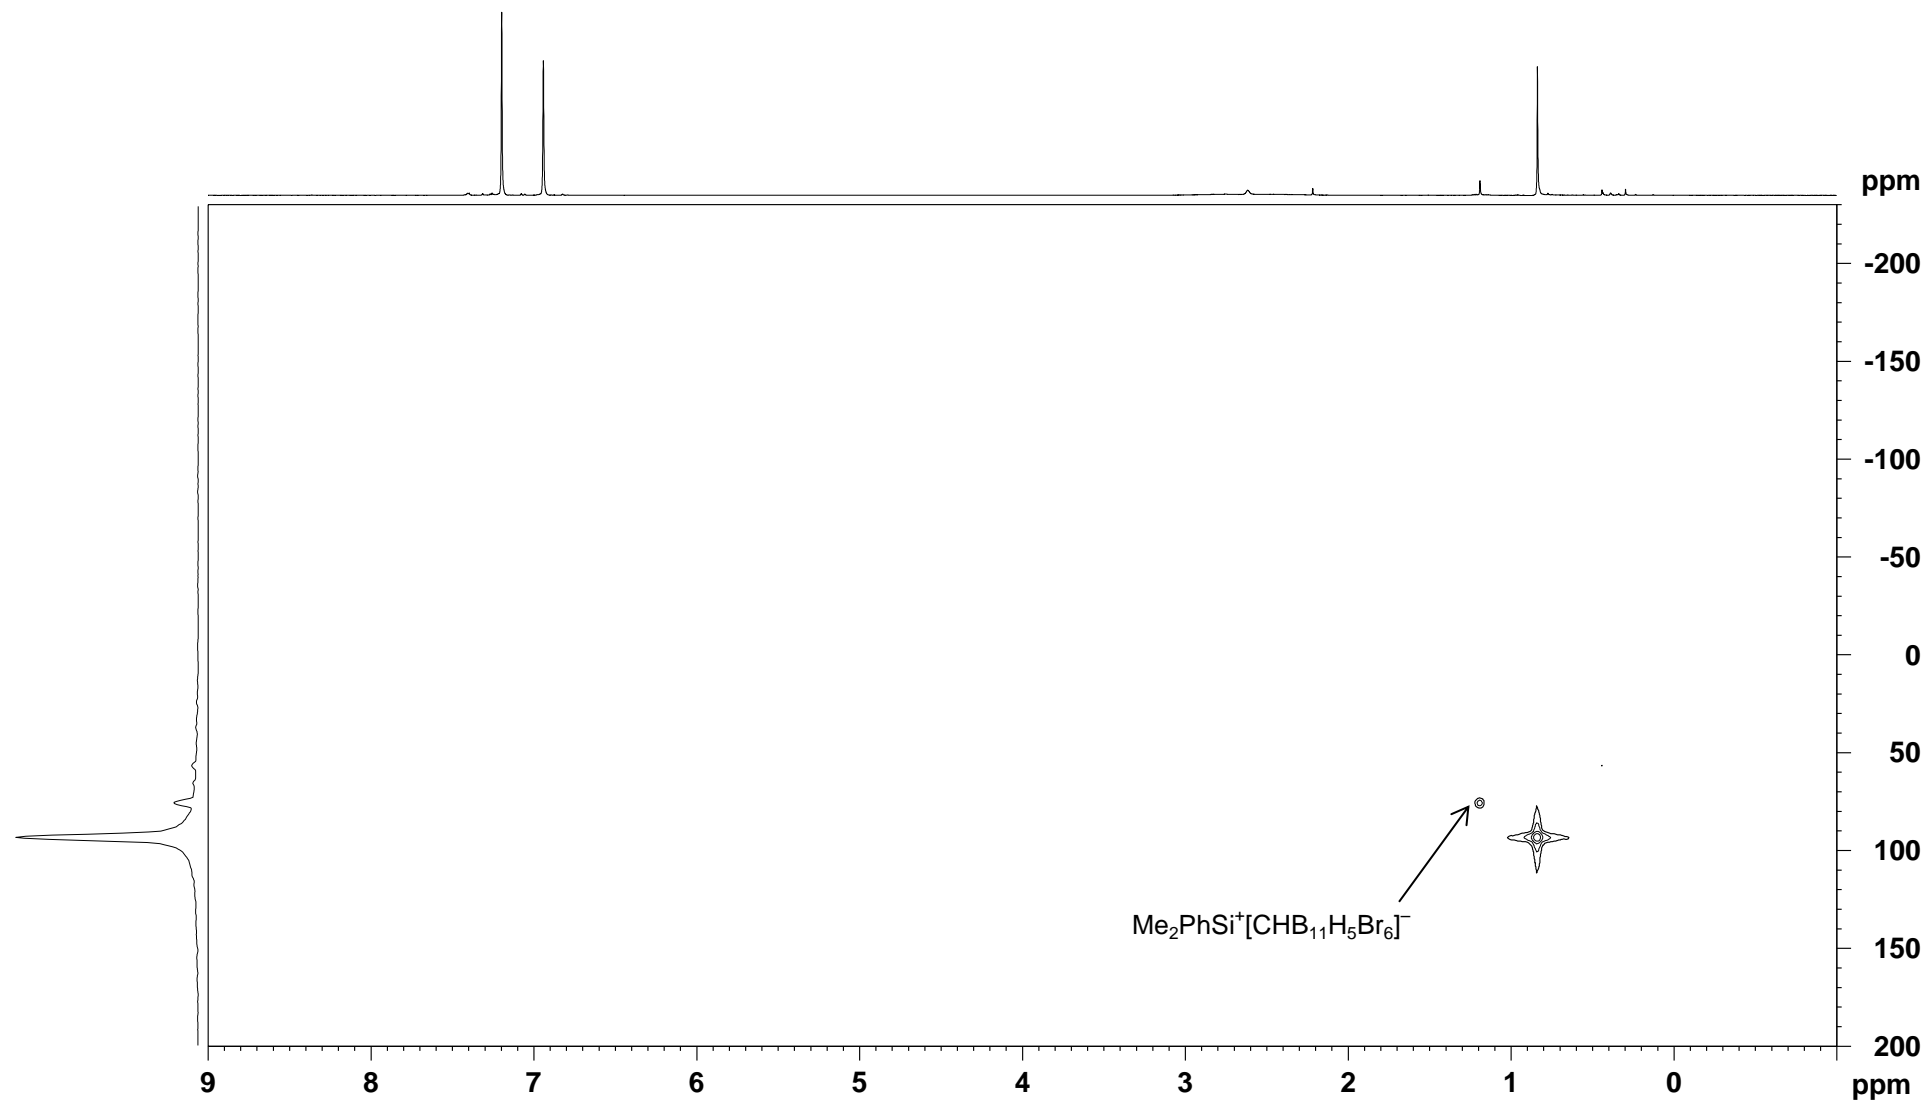

**Figure S58.**  $^1\text{H}$  NMR spectrum (500 MHz,  $o\text{-Cl}_2\text{C}_6\text{D}_4$ , 298 K) of  $\text{Me}_3\text{Si}^+[\text{B}(\text{C}_6\text{F}_5)_4]^-$  and  $\text{Me}_2\text{PhSi}^+[\text{B}(\text{C}_6\text{F}_5)_4]^-$  from the reaction of  $\text{Me}_2\text{PhSiH}$  with  $\text{Ph}_3\text{C}^+[\text{B}(\text{C}_6\text{F}_5)_4]^-$  (stopped after 10 min reaction time; \* = toluene-d8).

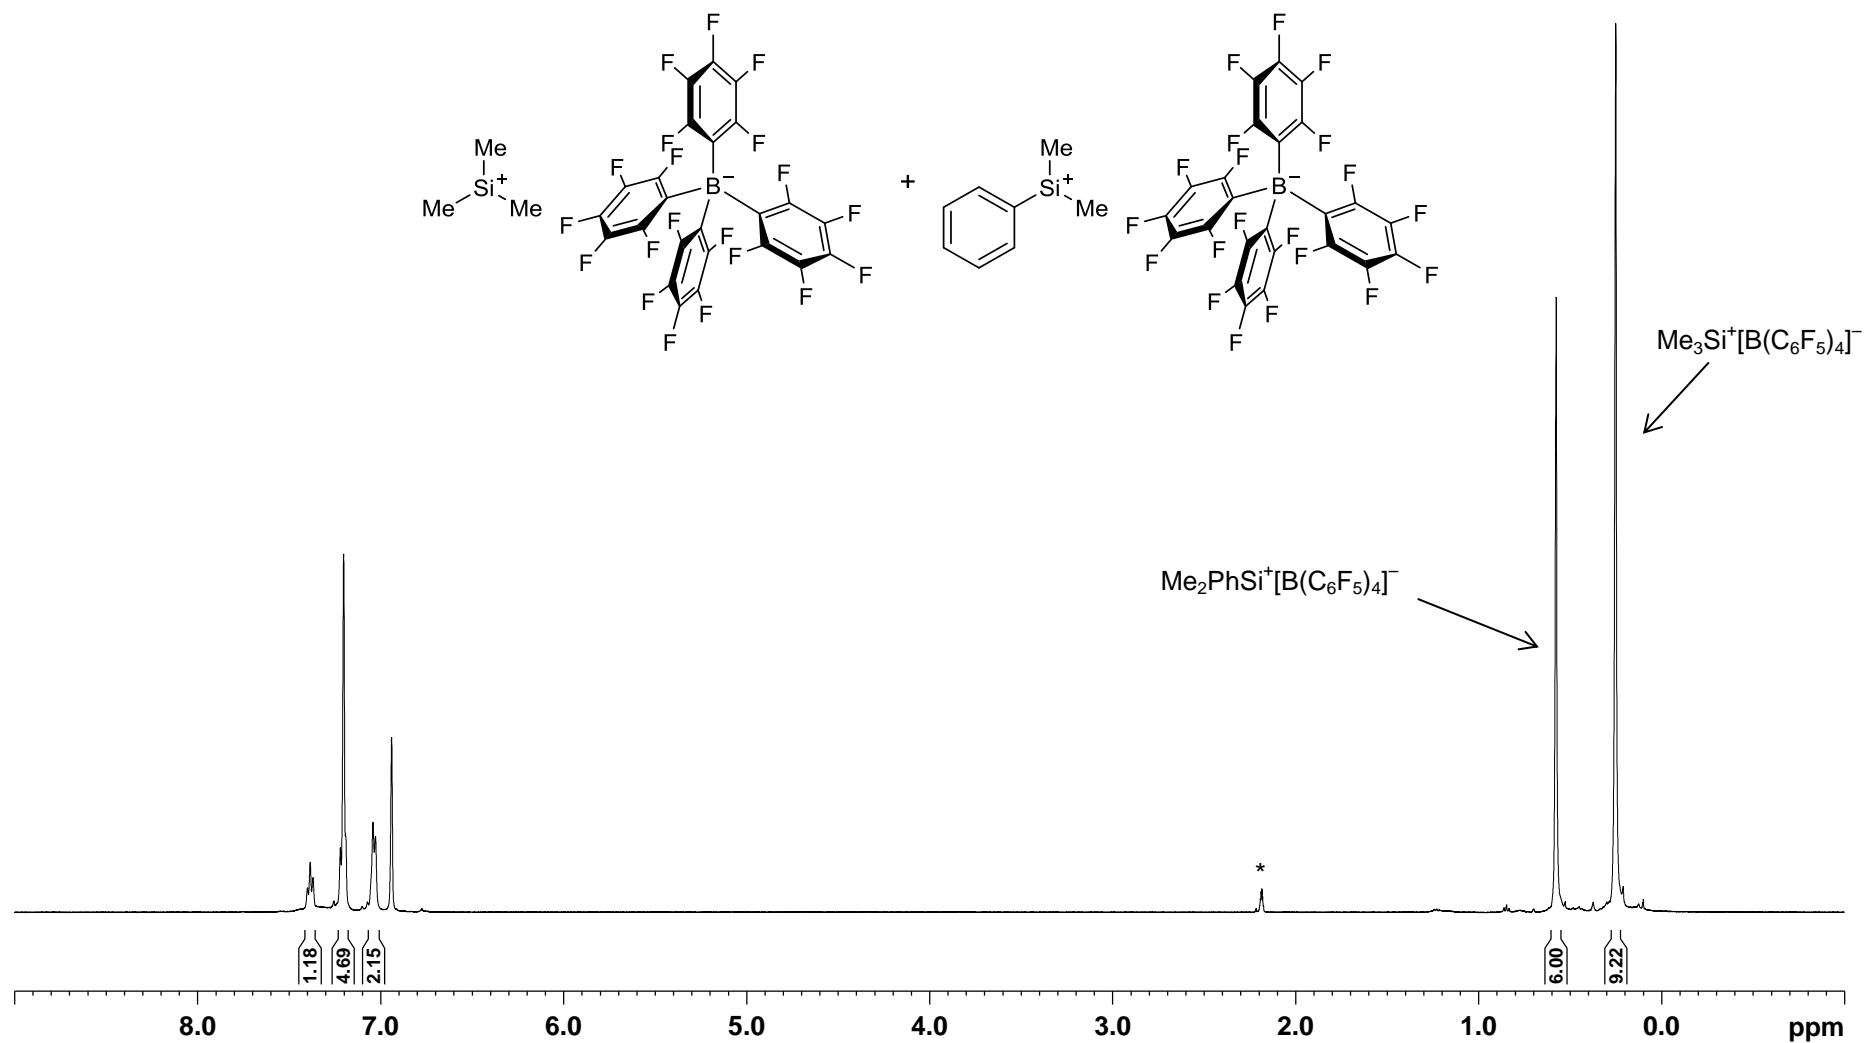

**Figure S59.**  $^1\text{H}/^{29}\text{Si}$  HMQC NMR spectrum (500/99 MHz,  $o\text{-Cl}_2\text{C}_6\text{D}_4$ , 298 K, optimized for  $J = 7$  Hz) of  $\text{Me}_3\text{Si}^+[\text{B}(\text{C}_6\text{F}_5)_4]^-$  and  $\text{Me}_2\text{PhSi}^+[\text{B}(\text{C}_6\text{F}_5)_4]^-$  from the reaction of  $\text{Me}_2\text{PhSiH}$  with  $\text{Ph}_3\text{C}^+[\text{B}(\text{C}_6\text{F}_5)_4]^-$  (stopped after 10 min reaction time).

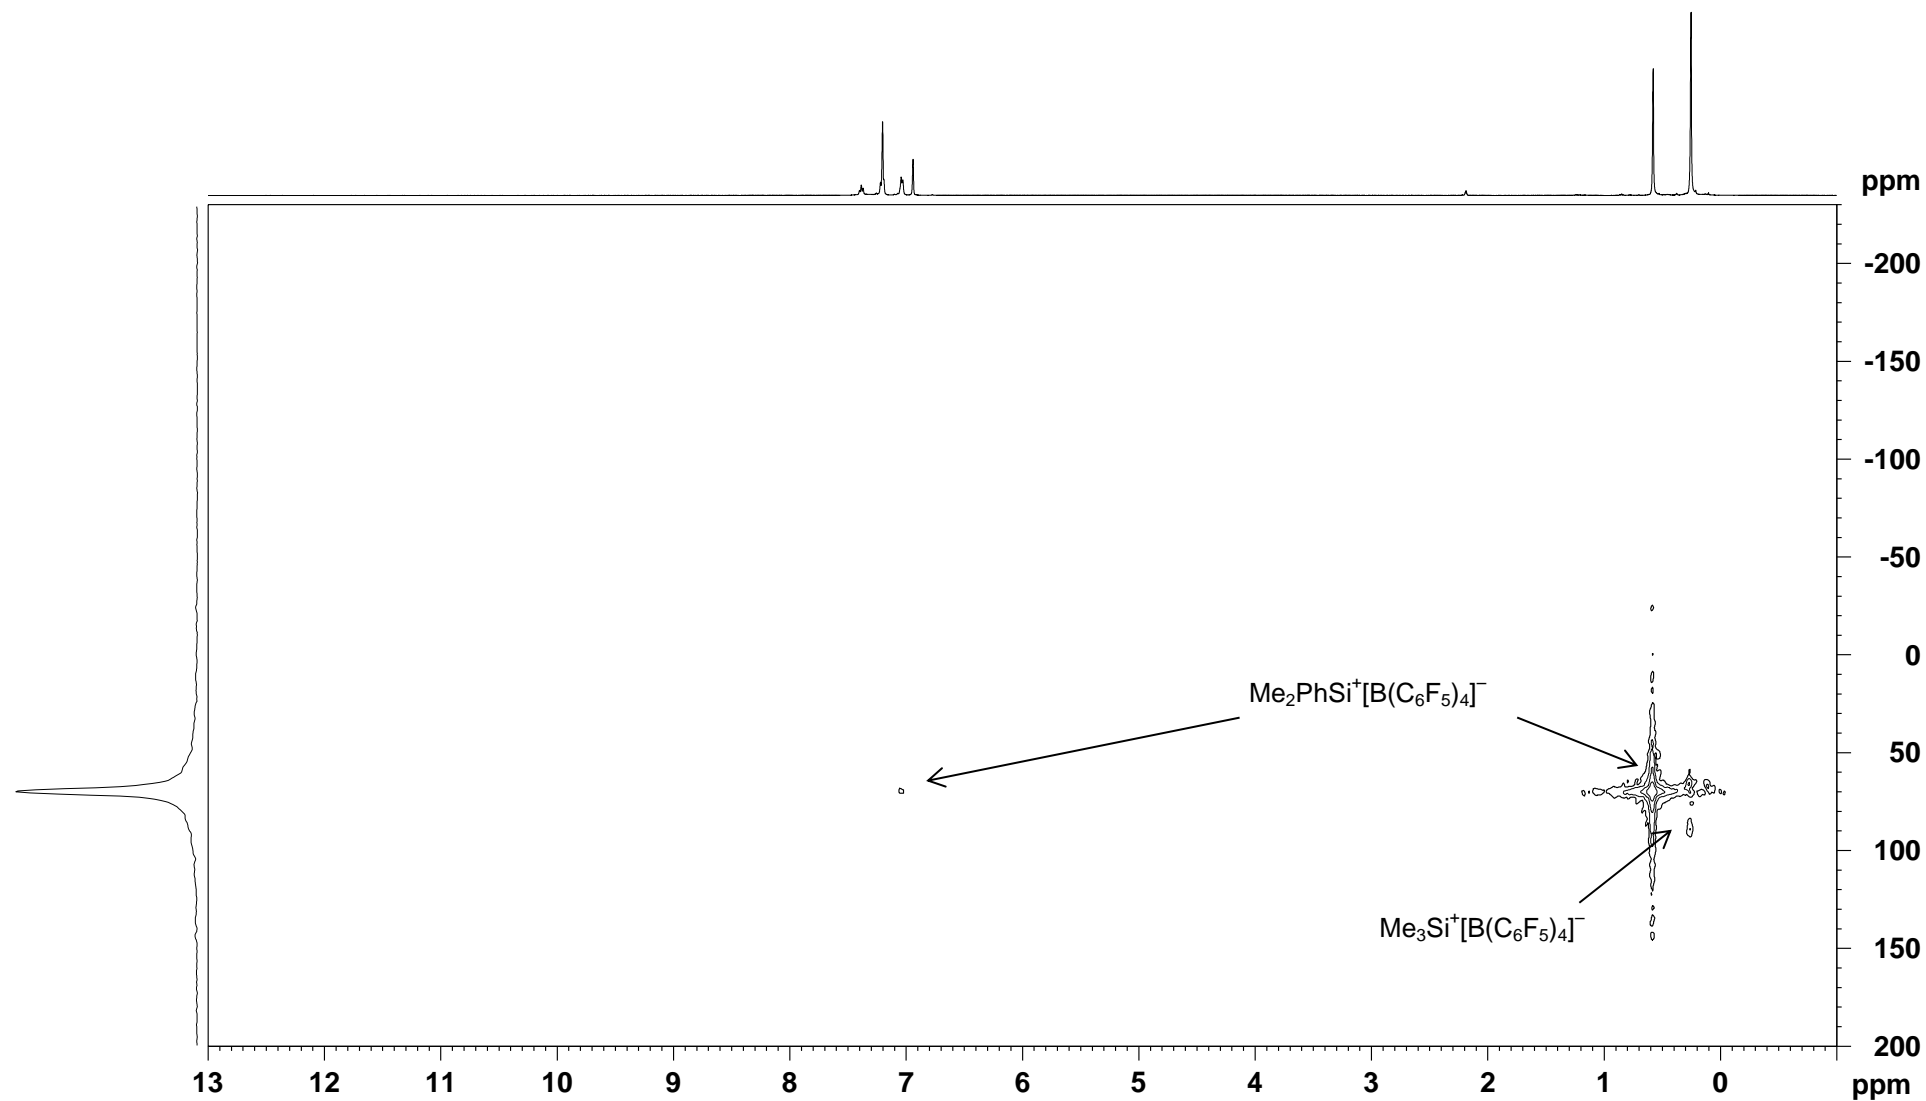



## 8 Crystallographic Data

Data for the single-crystal structure determination were collected with an *Agilent* SuperNova diffractometer equipped with a CCD area Atlas detector and a mirror monochromator by utilizing Cu- $K_{\alpha}$  radiation ( $\lambda = 1.5418 \text{ \AA}$ ). Software packages used: CrysAlis PRO for data collection, cell refinement, and data reduction,<sup>[S10]</sup> SHELXS-97 for structure solution,<sup>[S11]</sup> SHELXL-97 for structure refinement,<sup>[S12]</sup> and Mercury<sup>[S13]</sup> for graphics.

8.1 Molecular Structure of  $\text{MePh}_2\text{Si}^+[\text{CHB}_{11}\text{H}_5\text{Br}_6]^-$  (CCDC-1818582)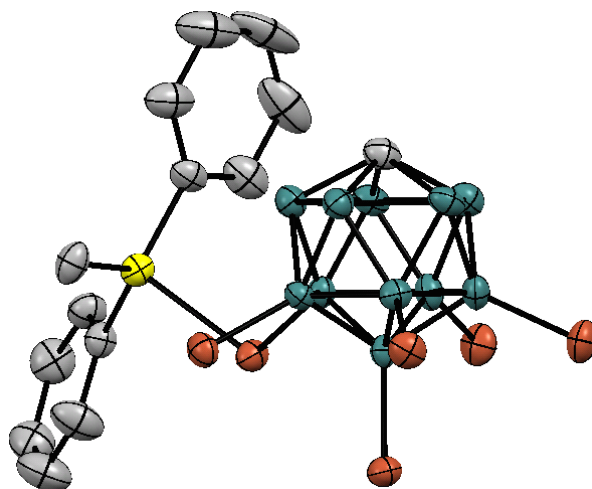

**Figure S60.** Molecular Structure of  $\text{MePh}_2\text{Si}^+[\text{CHB}_{11}\text{H}_5\text{Br}_6]^-$  (thermal ellipsoids at 50% probability level; H atoms omitted for clarity).

|                                   |                                                                                           |
|-----------------------------------|-------------------------------------------------------------------------------------------|
| Empirical formula                 | C <sub>14</sub> H <sub>19</sub> B <sub>11</sub> Br <sub>6</sub> Si                        |
| Formula weight                    | 813.75                                                                                    |
| Temperature                       | 150.00(10) K                                                                              |
| Wavelength                        | 1.54184 Å                                                                                 |
| Crystal system                    | Orthorhombic                                                                              |
| Space group                       | Pbca                                                                                      |
| Unit cell dimensions              | a = 18.5845(4) Å<br>b = 14.7047(2) Å<br>c = 19.6730(3) Å<br>α = 90°<br>β = 90°<br>γ = 90° |
| Volume                            | 5376.25(17) Å <sup>3</sup>                                                                |
| Z                                 | 8                                                                                         |
| Density (calculated)              | 2.011 Mg/m <sup>3</sup>                                                                   |
| Absorption coefficient            | 11.234 mm <sup>-1</sup>                                                                   |
| F(000)                            | 3056                                                                                      |
| Crystal size                      | 0.32 x 0.17 x 0.12 mm <sup>3</sup>                                                        |
| Theta range for data collection   | 4.44 to 67.48°.                                                                           |
| Index ranges                      | -22 ≤ h ≤ 17, -15 ≤ k ≤ 17, -23 ≤ l ≤ 23                                                  |
| Reflections collected             | 36966                                                                                     |
| Independent reflections           | 4839 [R(int) = 0.0863]                                                                    |
| Completeness to theta = 67.48°    | 100.0 %                                                                                   |
| Absorption correction             | Semi-empirical from equivalents                                                           |
| Max. and min. transmission        | 0.3458 and 0.1231                                                                         |
| Refinement method                 | Full-matrix least-squares on F <sup>2</sup>                                               |
| Data / restraints / parameters    | 4839 / 0 / 313                                                                            |
| Goodness-of-fit on F <sup>2</sup> | 1.084                                                                                     |
| Final R indices [I > 2σ(I)]       | R1 = 0.0368, wR2 = 0.0808                                                                 |
| R indices (all data)              | R1 = 0.0519, wR2 = 0.0881                                                                 |
| Largest diff. peak and hole       | 1.670 and -0.891 e.Å <sup>-3</sup>                                                        |

8.2 Molecular Structure of  $\text{Me}_3\text{Si}^+[\text{CHB}_{11}\text{H}_5\text{Br}_6]^-$  (CCDC-1818576)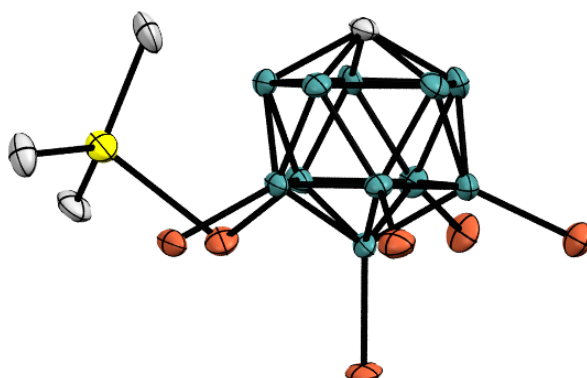

**Figure S61.** Molecular Structure of  $\text{Me}_3\text{Si}^+[\text{CHB}_{11}\text{H}_5\text{Br}_6]^-$  (thermal ellipsoids at 50% probability level; H atoms omitted for clarity).

|                                   |                                                                                                               |
|-----------------------------------|---------------------------------------------------------------------------------------------------------------|
| Empirical formula                 | C4 H15 B11 Br6 Si                                                                                             |
| Formula weight                    | 689.62                                                                                                        |
| Temperature                       | 150.00(10) K                                                                                                  |
| Wavelength                        | 1.54184 Å                                                                                                     |
| Crystal system                    | Triclinic                                                                                                     |
| Space group                       | P-1                                                                                                           |
| Unit cell dimensions              | a = 7.6280(5) Å<br>b = 10.6903(8) Å<br>c = 12.8641(7) Å<br>α = 83.210(6)°<br>β = 88.683(5)°<br>γ = 73.760(7)° |
| Volume                            | 1000.03(12) Å <sup>3</sup>                                                                                    |
| Z                                 | 2                                                                                                             |
| Density (calculated)              | 2.290 Mg/m <sup>3</sup>                                                                                       |
| Absorption coefficient            | 14.919 mm <sup>-1</sup>                                                                                       |
| F(000)                            | 636                                                                                                           |
| Crystal size                      | 0.16 x 0.15 x 0.08 mm <sup>3</sup>                                                                            |
| Theta range for data collection   | 3.46 to 67.50°                                                                                                |
| Index ranges                      | -9 ≤ h ≤ 8, -12 ≤ k ≤ 11, -12 ≤ l ≤ 15                                                                        |
| Reflections collected             | 6364                                                                                                          |
| Independent reflections           | 3603 [R(int) = 0.1375]                                                                                        |
| Completeness to theta = 67.50°    | 99.7 %                                                                                                        |
| Absorption correction             | Semi-empirical from equivalents                                                                               |
| Max. and min. transmission        | 0.4008 and 0.2057                                                                                             |
| Refinement method                 | Full-matrix least-squares on F <sup>2</sup>                                                                   |
| Data / restraints / parameters    | 3603 / 218 / 220                                                                                              |
| Goodness-of-fit on F <sup>2</sup> | 1.122                                                                                                         |
| Final R indices [I > 2σ(I)]       | R1 = 0.1000, wR2 = 0.2298                                                                                     |
| R indices (all data)              | R1 = 0.1348, wR2 = 0.2554                                                                                     |
| Largest diff. peak and hole       | 2.524 and -2.535 e.Å <sup>-3</sup>                                                                            |

### 8.3 Molecular Structure of $i\text{Pr}_2\text{PhSi}^+[\text{CHB}_{11}\text{H}_5\text{Br}_6]^-$ (CCDC-1818581)

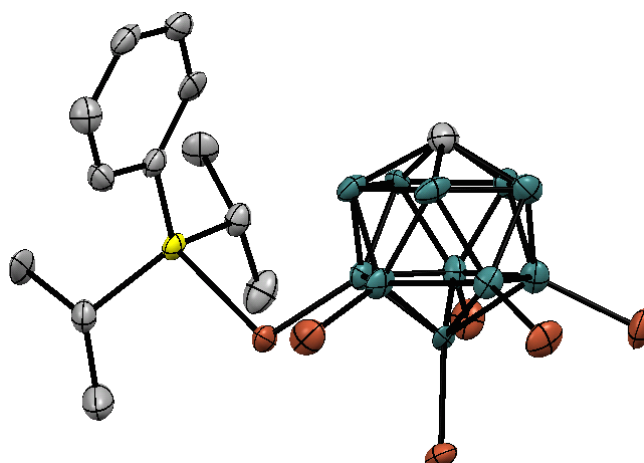

**Figure S62.** Molecular Structure of  $i\text{Pr}_2\text{PhSi}^+[\text{CHB}_{11}\text{H}_5\text{Br}_6]^-$  (thermal ellipsoids at 50% probability level; H atoms and one molecule of  $o\text{-Cl}_2\text{C}_6\text{H}_4$  omitted for clarity).

|                                   |                                                                                                        |
|-----------------------------------|--------------------------------------------------------------------------------------------------------|
| Empirical formula                 | C <sub>19</sub> H <sub>29</sub> B <sub>11</sub> Br <sub>6</sub> Cl <sub>2</sub> Si                     |
| Formula weight                    | 954.78                                                                                                 |
| Temperature                       | 150.00(10) K                                                                                           |
| Wavelength                        | 1.54184 Å                                                                                              |
| Crystal system                    | Monoclinic                                                                                             |
| Space group                       | Cc                                                                                                     |
| Unit cell dimensions              | a = 10.26054(14) Å<br>b = 38.4104(6) Å<br>c = 8.64061(13) Å<br>α = 90°<br>β = 100.5518(14)°<br>γ = 90° |
| Volume                            | 3347.77(9) Å <sup>3</sup>                                                                              |
| Z                                 | 4                                                                                                      |
| Density (calculated)              | 1.894 Mg/m <sup>3</sup>                                                                                |
| Absorption coefficient            | 10.566 mm <sup>-1</sup>                                                                                |
| F(000)                            | 1824                                                                                                   |
| Crystal size                      | 0.41 x 0.29 x 0.23 mm <sup>3</sup>                                                                     |
| Theta range for data collection   | 4.53 to 67.49°                                                                                         |
| Index ranges                      | -12 ≤ h ≤ 9, -46 ≤ k ≤ 45, -9 ≤ l ≤ 10                                                                 |
| Reflections collected             | 6169                                                                                                   |
| Independent reflections           | 3859 [R(int) = 0.0309]                                                                                 |
| Completeness to theta = 67.49°    | 99.8 %                                                                                                 |
| Absorption correction             | Analytical                                                                                             |
| Max. and min. transmission        | 0.1949 and 0.0988                                                                                      |
| Refinement method                 | Full-matrix least-squares on F <sup>2</sup>                                                            |
| Data / restraints / parameters    | 3859 / 8 / 374                                                                                         |
| Goodness-of-fit on F <sup>2</sup> | 1.098                                                                                                  |
| Final R indices [I > 2σ(I)]       | R1 = 0.0517, wR2 = 0.1337                                                                              |
| R indices (all data)              | R1 = 0.0525, wR2 = 0.1345                                                                              |
| Absolute structure parameter      | 0.07(5)                                                                                                |
| Largest diff. peak and hole       | 1.029 and -1.757 e.Å <sup>-3</sup>                                                                     |

## 9 Computational Data

We used Jaguar 9.1 quantum chemistry software<sup>[S14]</sup> to perform density functional theory calculations with M06 hybrid meta-GGA approximation of the electronic exchange and correlation energies. The Gibbs energies of the calculated structures include free energy and solvation corrections calculated with 6-31G\*\* basis set. In Jaguar program, this basis set is referred to as LACVP\*\*. The electronic energy is reevaluated as a single point energy at the cc-pVTZ(-f) basis, which is a triple-zeta basis set level. The unscaled vibrational frequencies were used to derive zero point energies and other thermodynamic parameters. Solution phase energies were calculated as the self-consistent reaction field (SCRF) energies of the gas phase geometries in the dielectric constant of toluene ( $\epsilon = 2.379$ ), which is the solvent used in the experiments.

### 9.1 Evaluation of Silylium Ion Stability

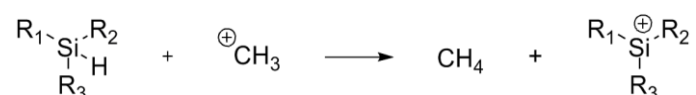

**Figure S63.** A model hydride transfer reaction to evaluate Si cation relative stability.

**Table S1.** Gibbs energies (kcal mol<sup>-1</sup>) of the hydride transfer reaction in Figure S63. Data shows Ph<sub>2</sub>MeSi<sup>+</sup> cation is the least electrophilic of the cations examined.

| Hydrosilane                      |          | Si cation                         |         | $\Delta_r G$ | $\Delta\Delta_r G^a$ |
|----------------------------------|----------|-----------------------------------|---------|--------------|----------------------|
| PhMe <sub>2</sub> Si-H           | 1CH, 1A  | PhMe <sub>2</sub> Si <sup>+</sup> | 1C, 6A  | -83.27       | -0.10                |
| PhMeSiH <sub>2</sub>             | 2CH      | PhMeHSi <sup>+</sup>              | 2C      | -75.87       | 7.40                 |
| Ph <sub>2</sub> MeSi-H           | 3CH, 1B  | Ph <sub>2</sub> MeSi <sup>+</sup> | 3C, 6B  | -84.19       | -1.02                |
| Ph <sub>3</sub> Si-H             | 4CH, 18B | Ph <sub>3</sub> Si <sup>+</sup>   | 4C, 19B | -83.17       | 0.00                 |
| Me <sub>3</sub> Si-H             | 5CH, 19B | Me <sub>3</sub> Si <sup>+</sup>   | 5C, 18B | -80.93       | 2.34                 |
| Ph <sub>2</sub> SiH <sub>2</sub> | 6CH      | Ph <sub>2</sub> HSi <sup>+</sup>  | 6C      | -77.33       | 5.94                 |
| Me <sub>2</sub> SiH <sub>2</sub> | 7CH      | Me <sub>2</sub> HSi <sup>+</sup>  | 7C      | -72.37       | 10.90                |

$$^a \Delta\Delta_r G = \Delta_r G - \Delta_r G(4C)$$

## 9.2 Silylium Ion Binding to Various Nucleophiles

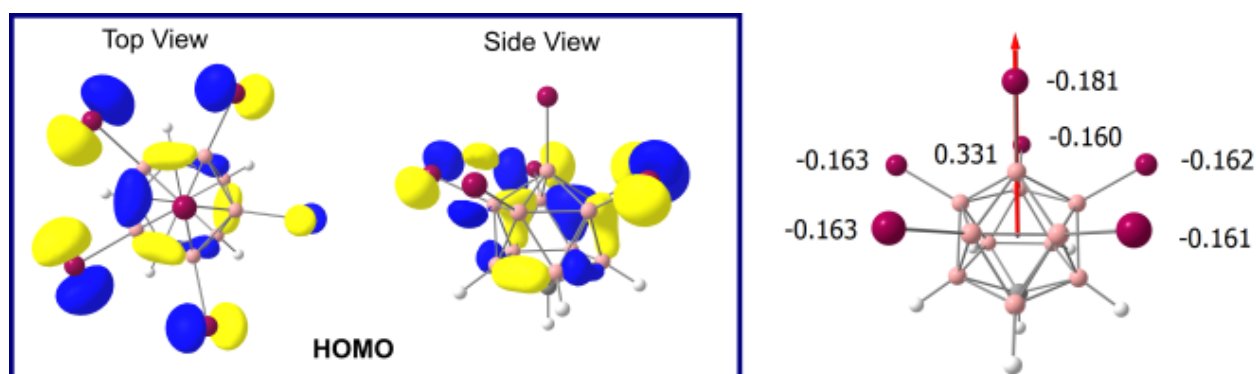

**Figure S64.** Calculated HOMO of the carborate and its dipole moment (7.946 Debye) is represented by a red arrow. Electrostatic charges are shown for the bromine and the apical boron.

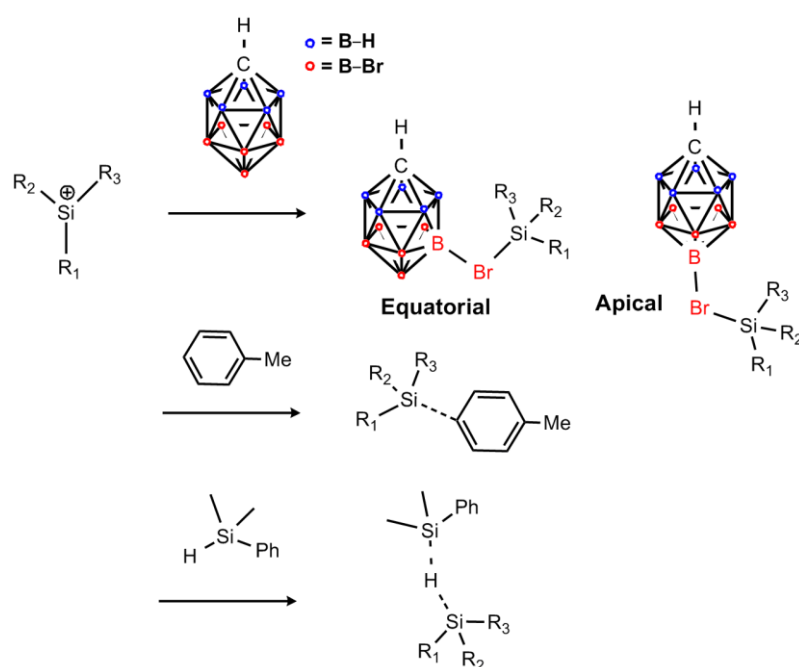

**Figure S65** Strategy for calculating binding affinities of Si cations for carborate, toluene and  $\text{Me}_2\text{PhSiH}$  (via hydride bridge).

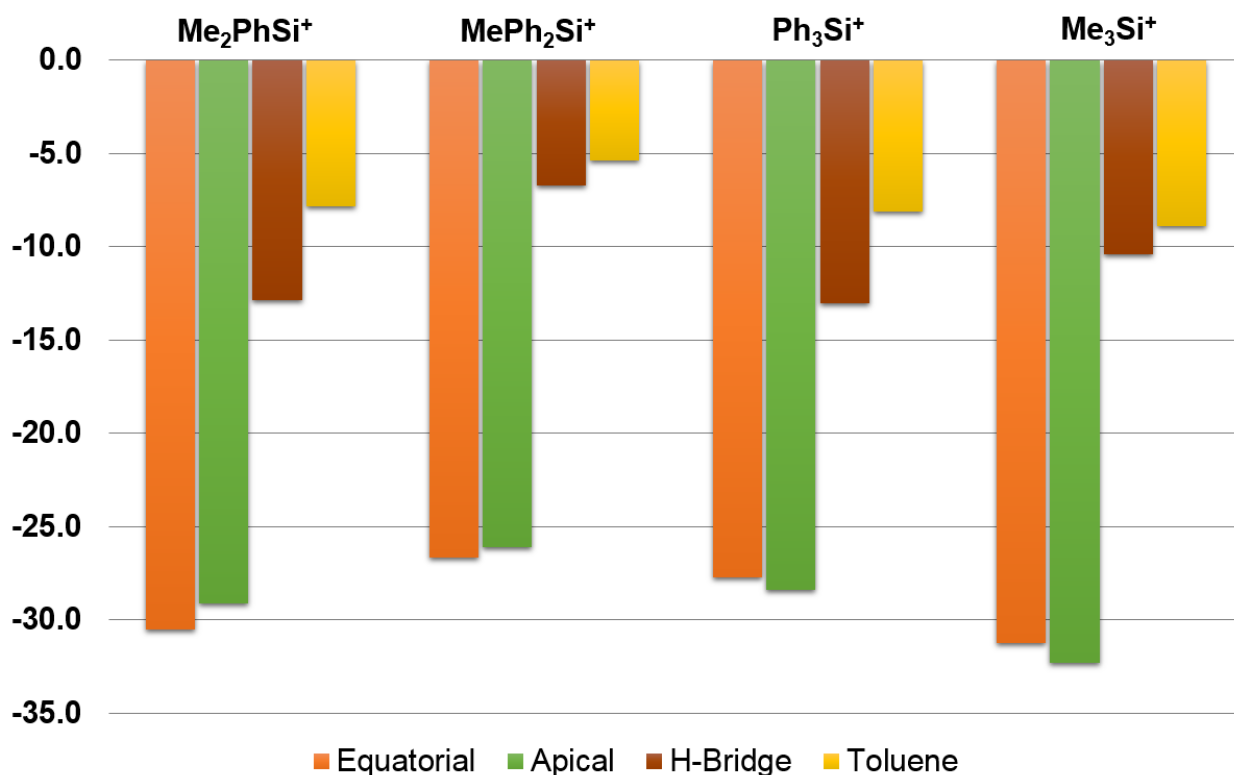

**Figure S66.** The association energies (kcal mol<sup>-1</sup>) of selected silylium ions with carborate (equatorial and apical), Me<sub>2</sub>PhSiH and toluene. The energies are calculated using free silylium ions as the references.

The calculated HOMO of the carborate in Figure S64 shows the negative charge is delocalized over the equatorial bromine atoms and the carborane cage. The calculated atomic charges from the electrostatic potential analysis show the apical bromine is slightly more electron rich than the equatorial ones. Additionally, the dipole moment of 7.946 Debye aligns with the apical B-Br bond. Consequently, the Si cations can bind to either of the equatorial or the apical bromides. The calculated binding energies, shown in Table S2, suggest that the Si association with the equatorial vs. apical bromide are similar, but the binding to the apical bromide is slightly preferred in most cases. Table S2 also lists the energy associated with the transfer of Si cations from the solvent toluene to carborate. The transfer energy is calculated as the difference in the free energies when Si cation binds with toluene vs. carborate. These energies indicate Me<sub>3</sub>Si<sup>+</sup> has a high preference for carborate, and liberates the most energy during the transfer from being toluene bound to carborate bound.

**Table S2** Binding energies ( $\text{kcal mol}^{-1}$ ) of Si cations with toluene, carborate and  $\text{Me}_2\text{PhSiH}$  (via Hydride Bridge). The differences in the association energies with carborate vs. Toluene are tabulated as transfer energies.

| Cations (nC)               | Toluene (nCtol) | H-Bridge | Carborate-Eq (nCAn1)  | Carborate-AP (nCAn2) | Transfer Energy |
|----------------------------|-----------------|----------|-----------------------|----------------------|-----------------|
| $\text{PhMe}_2\text{Si}^+$ | 1C              | -7.84    | -12.88 ( <b>7A</b> )  | -29.11               | -22.67          |
| $\text{PhMeHSi}^+$         | 2C              | -12.92   | -                     | -33.38               | -20.47          |
| $\text{Ph}_2\text{MeSi}^+$ | 3C              | -5.39    | -6.71 ( <b>14B</b> )  | -26.13               | -21.26          |
| $\text{Ph}_3\text{Si}^+$   | 4C              | -8.11    | -13.02 ( <b>11B</b> ) | -28.28               | -20.17          |
| $\text{Me}_3\text{Si}^+$   | 5C              | -8.90    | -10.41 ( <b>HB</b> )  | -32.32               | -23.42          |
| $\text{Ph}_2\text{HSi}^+$  | 6C              | -9.57    | -                     | -32.17               | -22.60          |
| $\text{Me}_2\text{HSi}^+$  | 7C              | -15.32   | -                     | -38.31               | -22.99          |

n = 1-7

### 9.3 Evaluation of Methyl Transfer Mechanism

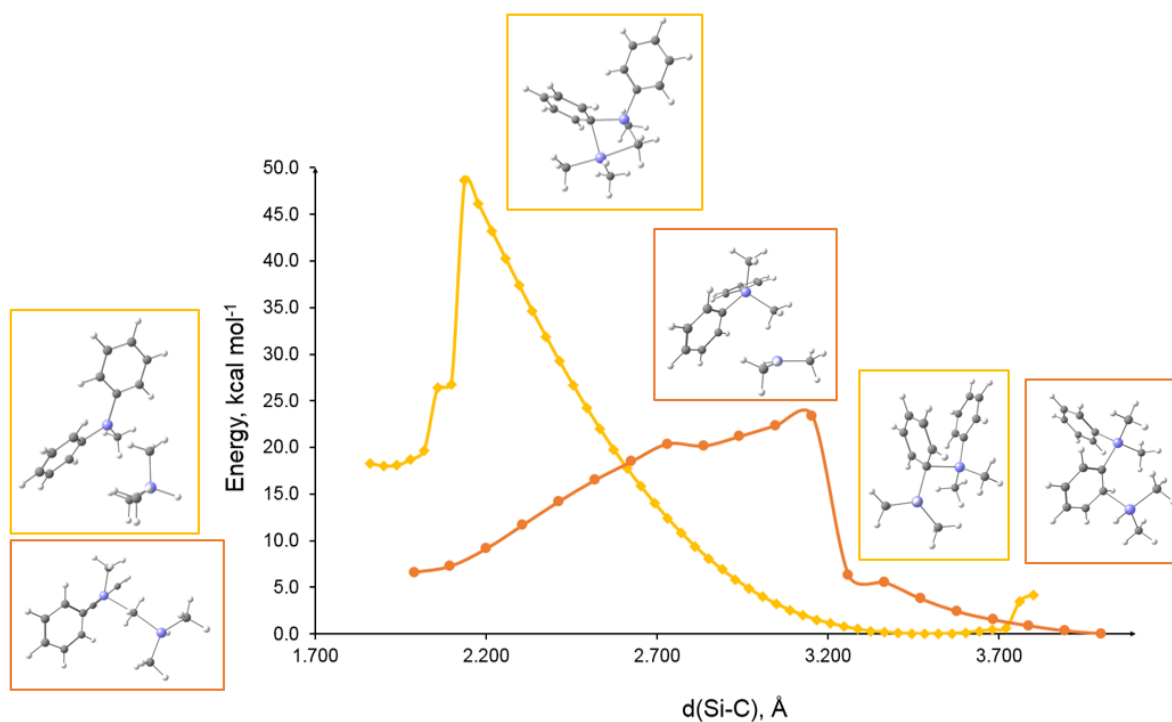

**Figure S67.** Relaxed geometry scans of **10A** formation from **8A** (yellow curve) and **9A** (orange curve) intermediates.



## 9.4 Geometries of the Bridged Structures

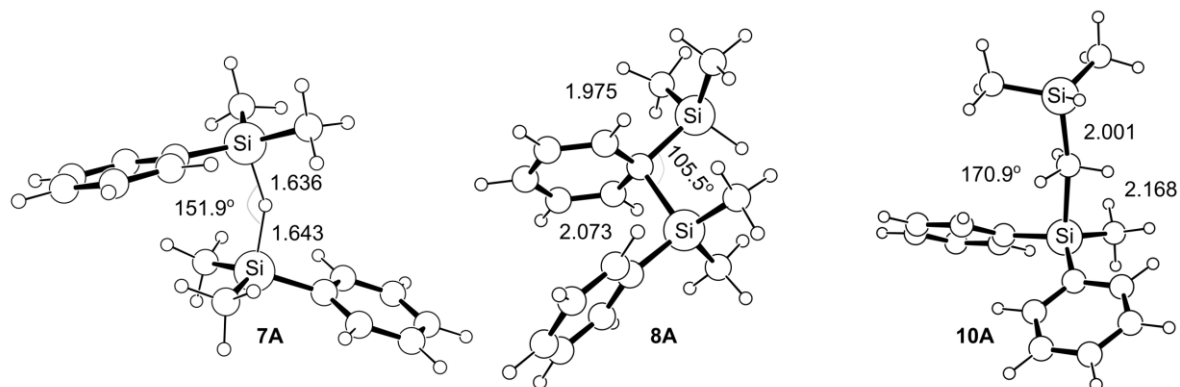

**Figure S68.** Calculated Hydride (**7A**), phenyl (**8A**) and methyl (**10A**) bridged structures. Bond lengths are in Å and bond angles are in degrees.

## 9.5 Energy Data

**Table S3 Energy data of Me<sub>2</sub>PhSiH Reactant**

|                                  | E(SCF)<br>eV<br>cc-pvtz(-f) | ZPE<br>kcal/mol<br>LACVP** | H<br>eV    | S<br>eu<br>LACVP** | G(solv)<br>kcal/mol<br>LACVP** | G(sol)<br>eV | ΔG(sol)<br>kcal/mol |
|----------------------------------|-----------------------------|----------------------------|------------|--------------------|--------------------------------|--------------|---------------------|
| <b>00-Carbonate</b>              | -10731.366                  | 76.890                     | -10728.032 | 141.827            | -23.05                         | -10730.865   | 0.00                |
| <b>1A</b>                        | -16365.679                  | 108.31                     | -16360.982 | 101.121            | -1.41                          | -16362.351   | 0.00                |
| <b>2A</b>                        | -19930.575                  | 175.43                     | -19922.968 | 122.053            | -24.29                         | -19925.599   | 0.00                |
| <b>3A</b>                        | -36296.702                  | 284.06                     | -36284.384 | 188.500            | -23.01                         | -36287.819   | 3.01                |
| <b>3A-TS</b>                     | -36296.231                  | 282.60                     | -36283.976 | 179.817            | -22.54                         | -36287.279   | 15.47               |
| <b>4A</b>                        | -36296.468                  | 284.24                     | -36284.142 | 189.303            | -23.65                         | -36287.615   | 7.71                |
| <b>5A</b>                        | -19953.653                  | 181.73                     | -19945.772 | 128.405            | -3.00                          | -19947.563   | 7.71                |
| <b>6A</b>                        | -16342.064                  | 103.12                     | -16337.592 | 93.215             | -30.18                         | -16340.106   | 6.45                |
| <b>7A</b>                        | -32709.065                  | 212.22                     | -32699.862 | 162.179            | -24.36                         | -32703.015   | -6.46               |
| <b>7A-TS</b>                     | -32708.537                  | 212.06                     | -32699.341 | 156.550            | -24.67                         | -32702.435   | 6.93                |
| <b>8A</b>                        | -32709.155                  | 213.10                     | -32699.914 | 155.779            | -25.24                         | -32703.023   | -6.63               |
| <b>8A-TS</b>                     | -32708.756                  | 212.63                     | -32699.535 | 152.438            | -25.78                         | -32702.624   | 2.56                |
| <b>9A</b>                        | -32708.934                  | 212.91                     | -32699.701 | 157.034            | -25.72                         | -32702.847   | -2.57               |
| <b>9A-TS</b>                     | -32707.963                  | 211.67                     | -32698.784 | 155.023            | -27.16                         | -32701.966   | 17.80               |
| <b>10A</b>                       | -32708.557                  | 212.55                     | -32699.340 | 164.757            | -25.31                         | -32702.568   | 3.87                |
| <b>10A-TS</b>                    | -32708.435                  | 211.82                     | -32699.250 | 161.470            | -24.73                         | -32702.410   | 7.51                |
| <b>11A</b>                       | -32709.060                  | 212.22                     | -32699.857 | 164.468            | -24.15                         | -32703.031   | -6.82               |
| <b>12A<br/>Me<sub>3</sub>Si+</b> | -11127.056                  | 68.09                      | -11124.103 | 89.027             | -35.23                         | -11126.782   | 3.80                |
| <b>12A Ph<sub>2</sub>MeSiH</b>   | -21580.319                  | 142.19                     | -21574.153 | 119.286            | -2.15                          | -21575.789   | 3.80                |
| <b>13A<br/>Me<sub>3</sub>SiH</b> | -11151.035                  | 74.25                      | -11147.815 | 82.670             | -0.61                          | -11148.911   | 0.99                |
| <b>13A MePh<sub>2</sub>Si+</b>   | -21557.050                  | 137.33                     | -21551.095 | 117.386            | -26.97                         | -21553.782   | 0.99                |
| <b>6A'</b>                       | -27077.395                  | 181.02                     | -27069.545 | 199.450            | -8.97                          | -27072.513   | 24.06               |
| <b>12A'</b>                      | -21862.658                  | 147.04                     | -21856.282 | 182.095            | -8.41                          | -21859.001   | -27.43              |
| <b>12A''</b>                     | -21862.829                  | 147.08                     | -21856.451 | 181.276            | -5.85                          | -21859.048   | -28.52              |
| <b>13A'</b>                      | -32292.068                  | 214.89                     | -32282.749 | 209.349            | -9.00                          | -32285.846   | -25.66              |

Table S4. Energy data of MePh<sub>2</sub>SiH Reactant

|                              | E(SCF)<br>eV<br>cc-pvtz(-f) | ZPE<br>kcal/mol<br>LACVP** | H<br>eV    | S<br>eu<br>LACVP** | G(solv)<br>kcal/mol<br>LACVP** | G(sol)<br>eV | ΔG(sol)<br>kcal/mol |
|------------------------------|-----------------------------|----------------------------|------------|--------------------|--------------------------------|--------------|---------------------|
| <b>1B</b>                    | -21580.327                  | 142.23                     | -21574.159 | 118.092            | -2.12                          | -21575.778   | 0.00                |
| <b>2B</b>                    | -19930.575                  | 175.43                     | -19922.968 | 122.053            | -24.29                         | -19925.599   | 0.00                |
| <b>3B</b>                    | -41511.386                  | 317.97                     | -41497.598 | 205.103            | -22.87                         | -41501.241   | 3.14                |
| <b>3B-TS</b>                 | -41511.016                  | 316.66                     | -41497.284 | 194.586            | -22.10                         | -41500.758   | 14.26               |
| <b>4B</b>                    | -41511.267                  | 318.84                     | -41497.441 | 205.163            | -23.76                         | -41501.124   | 5.84                |
| <b>5B</b>                    | -19953.653                  | 181.73                     | -19945.772 | 128.405            | -3.00                          | -19947.563   | 5.84                |
| <b>6B</b>                    | -21557.050                  | 137.33                     | -21551.095 | 117.386            | -26.97                         | -21553.782   | 0.75                |
| <b>7B</b>                    | -43138.644                  | 280.24                     | -43126.492 | 195.334            | -22.56                         | -43129.995   | -9.29               |
| <b>7B-TS</b>                 | -43138.040                  | 280.06                     | -43125.895 | 191.769            | -23.52                         | -43129.395   | 4.56                |
| <b>8B</b>                    | -43138.586                  | 281.00                     | -43126.401 | 186.517            | -23.87                         | -43129.847   | -5.88               |
| <b>8B-TS</b>                 | -43138.375                  | 280.22                     | -43126.224 | 185.571            | -23.78                         | -43129.654   | -1.42               |
| <b>9B</b>                    | -43138.445                  | 280.76                     | -43126.270 | 193.001            | -23.58                         | -43129.788   | -4.51               |
| <b>9B-TS</b>                 | -43137.416                  | 279.40                     | -43125.300 | 194.368            | -26.12                         | -43128.946   | 14.91               |
| <b>10B</b>                   | -43138.053                  | 280.38                     | -43125.895 | 194.128            | -23.19                         | -43129.410   | 4.21                |
| <b>10B-TS</b>                | -43137.898                  | 279.98                     | -43125.757 | 199.824            | -23.50                         | -43129.359   | 5.37                |
| <b>11B</b>                   | -43138.646                  | 280.17                     | -43126.497 | 197.918            | -22.37                         | -43130.026   | -9.99               |
| <b>12B</b>                   | -16342.064                  | 103.12                     | -16337.592 | 93.215             | -30.18                         | -16340.106   | 5.91                |
| <b>Me<sub>2</sub>PhSi+</b>   |                             |                            |            |                    |                                |              |                     |
| <b>12B Ph<sub>3</sub>SiH</b> | -26794.971                  | 176.14                     | -26787.333 | 137.051            | -2.89                          | -26789.230   | 5.91                |
| <b>13B Ph<sub>3</sub>Si+</b> | -26771.717                  | 171.51                     | -26764.280 | 134.395            | -24.68                         | -26767.087   | 3.58                |
| <b>13B</b>                   | -16365.679                  | 108.32                     | -16360.982 | 101.121            | -1.41                          | -16362.351   | 3.58                |
| <b>PhMe<sub>2</sub>SiH</b>   |                             |                            |            |                    |                                |              |                     |
| <b>14B</b>                   | -37923.783                  | 246.07                     | -37913.112 | 177.252            | -23.51                         | -37916.424   | -6.53               |
| <b>14B-TS</b>                | -37923.570                  | 246.72                     | -37912.871 | 168.295            | -23.47                         | -37916.065   | 1.74                |
| <b>15B</b>                   | -37923.812                  | 247.28                     | -37913.089 | 170.000            | -24.71                         | -37916.358   | -5.03               |
| <b>15B-TS</b>                | -37923.500                  | 246.82                     | -37912.797 | 165.347            | -25.00                         | -37916.019   | 2.81                |
| <b>16B</b>                   | -37923.577                  | 247.10                     | -37912.862 | 172.804            | -24.84                         | -37916.173   | -0.75               |
| <b>16B-TS</b>                | -37922.502                  | 244.78                     | -37911.887 | 180.681            | -27.51                         | -37915.416   | 16.70               |
| <b>17B</b>                   | -37923.320                  | 246.38                     | -37912.636 | 182.115            | -23.85                         | -37916.025   | 2.67                |
| <b>17B-TS</b>                | -37923.200                  | 246.20                     | -37912.524 | 178.125            | -23.02                         | -37915.825   | 7.27                |
| <b>18B</b>                   | -37923.750                  | 246.40                     | -37913.065 | 179.263            | -23.13                         | -37916.386   | -5.66               |
| <b>19B Me<sub>3</sub>Si+</b> | -11127.056                  | 68.09                      | -11124.103 | 89.027             | -35.23                         | -11126.782   | 2.96                |
| <b>19B Ph<sub>3</sub>SiH</b> | -26794.971                  | 176.14                     | -26787.333 | 137.051            | -2.89                          | -26789.230   | 2.96                |
| <b>20B Ph<sub>3</sub>Si+</b> | -26771.717                  | 171.51                     | -26764.280 | 134.395            | -24.68                         | -26767.087   | 3.58                |
| <b>20B Me<sub>3</sub>SiH</b> | -11151.035                  | 74.25                      | -11147.815 | 82.670             | -0.61                          | -11148.911   | 3.58                |
| <b>6B'</b>                   | -32292.068                  | 214.90                     | -32282.749 | 209.349            | -9.00                          | -32285.846   | -25.90              |
| <b>12B'</b>                  | -27077.395                  | 181.03                     | -27069.545 | 199.450            | -8.97                          | -27072.513   | -24.60              |
| <b>13B'' , 20B''</b>         | -37506.620                  | 248.83                     | -37495.830 | 235.919            | -7.03                          | -37499.185   | -24.70              |
| <b>19B''</b>                 | -21862.829                  | 147.08                     | -21856.451 | 181.276            | -5.85                          | -21859.048   | -29.36              |

Table S5. Energy data of Structures in Table S1 and Table S2

|                     | <b>E(SCF)</b><br>eV<br>cc-pvtz(-f) | <b>ZPE</b><br>kcal/mol<br>LACVP** | <b>H</b><br>eV | <b>S</b><br>eu<br>LACVP** | <b>G(solv)</b><br>kcal/mol<br>LACVP** | <b>G(sol)</b><br>eV | <b>ΔG(sol)</b><br>kcal/mol |
|---------------------|------------------------------------|-----------------------------------|----------------|---------------------------|---------------------------------------|---------------------|----------------------------|
| <b>00-CH3+</b>      | -1073.660                          | 19.25                             | -1072.825      | 44.642                    | -50.57                                | -1075.595           |                            |
| <b>00-CH4</b>       | -1101.830                          | 28.04                             | -1100.614      | 47.242                    | -0.22                                 | -1101.234           |                            |
| <b>00-Carborate</b> | -10731.366                         | 76.89                             | -10728.032     | 141.827                   | -23.05                                | -10730.865          |                            |
| <b>00-toluene</b>   | -7385.728                          | 79.92                             | -7382.262      | 79.537                    | -1.40                                 | -7383.352           |                            |
| <b>1C</b>           | -16342.154                         | 102.88                            | -16337.693     | 102.204                   | -30.22                                | -16340.325          |                            |
| <b>1CH</b>          | -16365.680                         | 108.32                            | -16360.983     | 101.121                   | -1.44                                 | -16362.353          | -83.27                     |
| <b>1CAn</b>         | -27077.395                         | 181.03                            | -27069.545     | 199.450                   | -8.97                                 | -27072.513          | -30.51                     |
| <b>1Ctol</b>        | -23729.133                         | 184.47                            | -23721.134     | 134.726                   | -26.30                                | -23724.016          | -7.84                      |
| <b>2C</b>           | -15272.245                         | 85.17                             | -15268.552     | 91.145                    | -31.33                                | -15271.089          |                            |
| <b>2CH</b>          | -15296.095                         | 90.52                             | -15292.170     | 93.740                    | -1.30                                 | -15293.438          | -75.87                     |
| <b>2CAn</b>         | -26007.619                         | 163.26                            | -26000.539     | 179.448                   | -8.19                                 | -26003.214          | -29.07                     |
| <b>2Ctol</b>        | -22659.424                         | 166.73                            | -22652.194     | 127.005                   | -26.85                                | -22655.000          | -12.92                     |
| <b>3C</b>           | -21557.050                         | 137.33                            | -21551.095     | 117.386                   | -26.97                                | -21553.782          |                            |
| <b>3CH</b>          | -21580.311                         | 142.08                            | -21574.150     | 117.962                   | -2.20                                 | -21575.770          | -84.19                     |
| <b>3CAn</b>         | -32292.068                         | 214.90                            | -32282.749     | 209.349                   | -9.00                                 | -32285.846          | -26.65                     |
| <b>3Ctol</b>        | -28943.840                         | 218.44                            | -28934.367     | 151.757                   | -24.94                                | -28937.411          | -5.39                      |
| <b>4C</b>           | -26771.717                         | 171.50                            | -26764.280     | 134.531                   | -24.77                                | -26767.093          |                            |
| <b>4CH</b>          | -26794.965                         | 176.01                            | -26787.333     | 128.878                   | -2.93                                 | -26789.126          | -83.17                     |
| <b>4CAn</b>         | -37506.652                         | 248.80                            | -37495.863     | 224.814                   | -9.02                                 | -37499.161          | -27.73                     |
| <b>4Ctol</b>        | -34158.527                         | 252.47                            | -34147.579     | 169.268                   | -23.73                                | -34150.796          | -8.11                      |
| <b>5C</b>           | -26794.965                         | 176.01                            | -26787.333     | 128.878                   | -2.93                                 | -26789.126          |                            |
| <b>5CH</b>          | -11151.035                         | 74.26                             | -11147.815     | 82.712                    | -0.62                                 | -11148.911          | -80.93                     |
| <b>5CAn</b>         | -21862.658                         | 147.04                            | -21856.282     | 182.095                   | -8.41                                 | -21859.001          | -31.23                     |
| <b>5Ctol</b>        | -18514.303                         | 150.43                            | -18507.780     | 119.615                   | -27.50                                | -18510.519          | -8.90                      |
| <b>6C</b>           | -20487.207                         | 119.50                            | -20482.025     | 108.328                   | -27.48                                | -20484.617          |                            |
| <b>6CH</b>          | -20510.736                         | 124.47                            | -20505.339     | 114.161                   | -2.05                                 | -20506.903          | -77.33                     |
| <b>6CAn</b>         | -31222.268                         | 197.25                            | -31213.715     | 201.159                   | -8.50                                 | -31216.684          | -27.71                     |
| <b>6Ctol</b>        | -27874.115                         | 200.67                            | -27865.413     | 145.084                   | -25.25                                | -27868.384          | -9.57                      |
| <b>7C</b>           | -10057.034                         | 50.32                             | -10054.852     | 76.978                    | -37.76                                | -10057.485          |                            |
| <b>7CH</b>          | -10081.476                         | 56.57                             | -10079.023     | 72.944                    | -0.45                                 | -10079.986          | -72.37                     |
| <b>7CAn</b>         | -20792.912                         | 129.29                            | -20787.305     | 176.444                   | -8.35                                 | -20789.949          | -36.88                     |
| <b>7Ctol</b>        | -17444.609                         | 132.81                            | -17438.850     | 110.707                   | -28.12                                | -17441.500          | -15.32                     |
| <b>1CAn2</b>        | -27077.453                         | 181.05                            | -27069.602     | 198.468                   | -6.54                                 | -27072.452          | -29.11                     |
| <b>2CAn2</b>        | -26007.734                         | 163.31                            | -26000.652     | 193.131                   | -6.46                                 | -26003.429          | -33.38                     |
| <b>3CAn2</b>        | -32292.067                         | 215.07                            | -32282.741     | 212.091                   | -6.86                                 | -32285.780          | -26.13                     |
| <b>4CAn2</b>        | -37506.620                         | 248.83                            | -37495.830     | 235.919                   | -7.03                                 | -37499.185          | -28.42                     |
| <b>5CAn2</b>        | -21862.829                         | 147.08                            | -21856.451     | 181.276                   | -5.85                                 | -21859.048          | -32.32                     |
| <b>6CAn2</b>        | -31222.442                         | 197.18                            | -31213.891     | 210.365                   | -6.04                                 | -31216.873          | -32.17                     |
| <b>7CAn2</b>        | -20793.103                         | 129.39                            | -20787.492     | 175.074                   | -5.84                                 | -20790.009          | -38.31                     |
| <b>HB</b>           | -27494.309                         | 178.21                            | -27486.581     | 145.727                   | -25.80                                | -27489.584          |                            |

## 9.6 Coordinates of the Calculated Structures

=====

### 1A

=====

|    |               |               |               |
|----|---------------|---------------|---------------|
| Si | -2.2010587379 | -0.2625150744 | -5.5481060162 |
| C  | -2.6788657607 | -1.0648806125 | -7.1795520101 |
| H  | -3.7653490278 | -1.0945225447 | -7.3124363685 |
| H  | -2.2576597553 | -0.4925126476 | -8.0155844398 |
| H  | -2.2990376385 | -2.0898963394 | -7.2525043378 |
| C  | -2.8382288695 | 1.5023545887  | -5.4966124492 |
| C  | -3.7333881975 | 1.9355830959  | -4.5122479262 |
| C  | -2.4072408015 | 2.4390713051  | -6.4456565967 |
| C  | -4.1876509860 | 3.2507756618  | -4.4780718784 |
| C  | -2.8550651381 | 3.7540546952  | -6.4189217706 |
| C  | -3.7487863848 | 4.1613299426  | -5.4325180794 |
| H  | -4.087755338  | 1.2309622483  | -3.7585852857 |
| H  | -1.7066753146 | 2.1353079380  | -7.2262767533 |
| H  | -4.8856353826 | 3.5660649708  | -3.7051247846 |
| H  | -2.5087148173 | 4.4642644891  | -7.1668891604 |
| H  | -4.1016751052 | 5.1901984642  | -5.4081130981 |
| C  | -0.3275528112 | -0.2563249779 | -5.3904088363 |
| H  | -0.0016738171 | 0.1921969156  | -4.4463460908 |
| H  | 0.0874051585  | -1.2687987057 | -5.4476629645 |
| H  | 0.1137408744  | 0.3299197384  | -6.2061851800 |
| H  | -2.8219344840 | -0.9939834601 | -4.4082510384 |

=====

### 2A

=====

|   |               |               |               |
|---|---------------|---------------|---------------|
| C | -1.2358184993 | 2.8052108999  | -3.0531558142 |
| C | -0.7081322697 | 2.1002633615  | -1.9716002483 |
| C | -1.8183612395 | 2.1288095808  | -4.1249421025 |
| C | -0.7478011253 | 0.7186271734  | -1.9639590926 |
| C | -1.8890457396 | 0.7484977673  | -4.1125458585 |
| C | -1.3457923037 | 0.0147867822  | -3.0340353434 |
| C | -4.7004289516 | -3.4040119070 | -4.8002941132 |
| C | -4.8884181138 | -2.1736200689 | -4.1709085577 |
| C | -3.4348528734 | -3.9876872987 | -4.8531104367 |
| C | -3.8113753066 | -1.5165458579 | -3.6059921403 |
| C | -2.3573845089 | -3.3523830126 | -4.2642215366 |
| C | -2.5243858942 | -2.0984878039 | -3.6336998443 |
| C | -1.4050941680 | -1.4247456909 | -3.0253484838 |
| C | 1.7008466563  | -3.6623832360 | -1.2130341556 |
| C | 2.0000942144  | -2.4663833258 | -1.8650461895 |
| C | -0.6277164051 | -3.4091622181 | -1.7556112220 |
| C | 0.9873163198  | -1.7251986090 | -2.4451830984 |
| C | -0.3481536745 | -2.1872307394 | -2.4093082776 |
| H | -3.9602838742 | -0.5733254895 | -3.0861761919 |
| H | -1.3642774538 | -3.7893174049 | -4.3316163933 |
| H | -3.2934986205 | -4.9376373475 | -5.3604024678 |
| H | -5.5477344493 | -3.9128807378 | -5.2528872010 |
| H | -5.8804755217 | -1.7348094862 | -4.1170693935 |
| H | 1.2216338552  | -0.8095877788 | -2.9822483722 |
| H | 3.0278918358  | -2.1202756017 | -1.9239048573 |
| C | 0.3876410652  | -4.1282949807 | -1.1525475300 |
| H | -2.3132300998 | 0.2164104928  | -4.9605330240 |
| H | -0.3712064852 | 0.1671491698  | -1.1060890922 |
| H | -0.2769946396 | 2.6355936431  | -1.1306775264 |
| H | -1.1926253646 | 3.8912824406  | -3.0611495354 |
| H | -2.2098388718 | 2.6843061763  | -4.9721674564 |
| H | 2.4982742758  | -4.2367161350 | -0.7483387911 |
| H | 0.1602864623  | -5.0505821352 | -0.6259034010 |
| H | -1.6564258288 | -3.7522217038 | -1.6804146358 |

=====  
**3A**  
=====

|    |             |              |              |
|----|-------------|--------------|--------------|
| C  | 7.069235451 | 11.197978189 | -1.024742190 |
| C  | 7.448709726 | 10.082203697 | -0.268202735 |
| C  | 6.248417939 | 12.154777665 | -0.409428069 |
| C  | 7.020382929 | 9.920587870  | 1.046700637  |
| C  | 5.809339143 | 11.997006534 | 0.901107826  |
| C  | 6.194103121 | 10.875175253 | 1.631347093  |
| H  | 8.095753245 | 9.323509889  | -0.708526519 |
| H  | 5.941330894 | 13.043792323 | -0.964938330 |
| H  | 7.337605153 | 9.051334283  | 1.619048518  |
| H  | 5.175472323 | 12.754061581 | 1.358733995  |
| H  | 5.861343669 | 10.752616989 | 2.659457763  |
| H  | 6.386563574 | 11.063197643 | -3.668398650 |
| C  | 8.073092076 | 13.173154784 | -3.158706062 |
| H  | 7.265783260 | 13.876897915 | -2.922779532 |
| H  | 8.937938595 | 13.450743503 | -2.545564922 |
| H  | 8.348629182 | 13.319465697 | -4.209033182 |
| Si | 7.584234174 | 11.393618258 | -2.822076051 |
| C  | 8.972078487 | 10.207862819 | -3.241328051 |
| H  | 9.315465070 | 10.358066417 | -4.270389797 |
| H  | 9.831753503 | 10.368519681 | -2.580335380 |
| H  | 8.667503135 | 9.159893469  | -3.144557162 |
| C  | 3.557481888 | 10.741195166 | -3.485262385 |
| C  | 3.405994214 | 11.981927230 | -2.763913168 |
| C  | 4.030800528 | 13.161050014 | -3.227796661 |
| C  | 2.623093019 | 12.044695501 | -1.591324502 |
| C  | 3.883047940 | 14.350236243 | -2.536972001 |
| C  | 2.458592994 | 13.243982793 | -0.921893208 |
| C  | 3.091180760 | 14.394723902 | -1.389322794 |
| H  | 4.676786699 | 13.113441878 | -4.101455320 |
| H  | 2.103855442 | 11.154370524 | -1.247331957 |
| H  | 4.389017650 | 15.246143984 | -2.886348248 |
| H  | 1.829623205 | 13.288190796 | -0.037424756 |
| H  | 2.966264955 | 15.333749506 | -0.856070757 |
| C  | 3.575787366 | 9.488531304  | -2.777459989 |
| C  | 4.107604309 | 9.405985375  | -1.469609115 |
| C  | 3.060242718 | 8.316644185  | -3.379280240 |
| C  | 4.135496415 | 8.192846323  | -0.805255744 |
| C  | 3.065383205 | 7.117752615  | -2.693873601 |
| C  | 3.609832614 | 7.053042531  | -1.410406848 |
| H  | 4.551061092 | 10.286060007 | -1.007571000 |
| H  | 2.607115527 | 8.376812324  | -4.365034556 |
| H  | 4.578287820 | 8.137863307  | 0.185492380  |
| H  | 2.638799873 | 6.229734088  | -3.151313722 |
| H  | 3.621797228 | 6.104779470  | -0.878809148 |
| C  | 3.674938214 | 10.764381330 | -4.923503271 |
| C  | 4.480289236 | 9.818135465  | -5.594894494 |
| C  | 2.994870422 | 11.739438150 | -5.685262410 |
| C  | 4.608822601 | 9.859551982  | -6.970622887 |
| C  | 3.107194942 | 11.756127455 | -7.063448592 |
| C  | 3.918996383 | 10.822895621 | -7.705803329 |
| H  | 5.047277175 | 9.095047386  | -5.014542563 |
| H  | 2.339058070 | 12.446779994 | -5.184957238 |
| H  | 5.254317883 | 9.147294116  | -7.476245623 |
| H  | 2.558751332 | 12.492958659 | -7.643066057 |
| H  | 4.016102762 | 10.847177236 | -8.788183662 |

=====  
**3A-TS**  
=====

|   |             |              |              |
|---|-------------|--------------|--------------|
| C | 6.266732889 | 11.847826764 | -1.262983465 |
| C | 5.878000043 | 11.242867423 | -0.056707790 |
| C | 6.454374699 | 13.238545359 | -1.280177692 |
| C | 5.667142727 | 12.001328247 | 1.086705065  |
| C | 6.258774988 | 13.998597063 | -0.133881864 |
| C | 5.854090423 | 13.380874885 | 1.046044293  |
| H | 5.752338077 | 10.159647500 | -0.003867543 |

|    |             |              |              |
|----|-------------|--------------|--------------|
| H  | 6.760066905 | 13.737123380 | -2.200532891 |
| H  | 5.365542665 | 11.519558513 | 2.013604232  |
| H  | 6.419546050 | 15.073791401 | -0.159134055 |
| H  | 5.692948434 | 13.975750207 | 1.941988512  |
| H  | 4.880461672 | 10.589173592 | -3.188283998 |
| C  | 7.057387290 | 11.823221314 | -4.282098834 |
| H  | 6.410655760 | 12.672153538 | -4.532686024 |
| H  | 8.058878042 | 12.215625105 | -4.067786724 |
| H  | 7.131457732 | 11.186695398 | -5.170307007 |
| Si | 6.414602769 | 10.858740069 | -2.820829108 |
| C  | 7.122499496 | 9.143150051  | -2.644217901 |
| H  | 6.993100683 | 8.570657759  | -3.571148953 |
| H  | 8.197829489 | 9.206985904  | -2.436769115 |
| H  | 6.656629582 | 8.574999929  | -1.831337648 |
| C  | 3.382668185 | 10.389324028 | -3.444929302 |
| C  | 2.857878968 | 11.306150526 | -2.416990069 |
| C  | 3.259119671 | 12.652810109 | -2.413814751 |
| C  | 1.953282902 | 10.869958895 | -1.437521767 |
| C  | 2.784670655 | 13.530018363 | -1.455113611 |
| C  | 1.462699089 | 11.757733350 | -0.490277200 |
| C  | 1.883353517 | 13.082842203 | -0.490166398 |
| H  | 3.967378309 | 13.000649486 | -3.165152005 |
| H  | 1.605649458 | 9.840998493  | -1.440976246 |
| H  | 3.121161660 | 14.563265920 | -1.452795288 |
| H  | 0.745868108 | 11.411928866 | 0.249444421  |
| H  | 1.505404167 | 13.772407235 | 0.260257783  |
| C  | 3.328024356 | 8.935770575  | -3.180521627 |
| C  | 3.740720365 | 8.445274290  | -1.930115633 |
| C  | 2.851265082 | 8.030788499  | -4.138195021 |
| C  | 3.687623789 | 7.092831243  | -1.646231722 |
| C  | 2.781836538 | 6.674404911  | -3.843268717 |
| C  | 3.203393510 | 6.203217911  | -2.605873715 |
| H  | 4.116006096 | 9.151952757  | -1.190157453 |
| H  | 2.502482186 | 8.392790470  | -5.100988799 |
| H  | 4.020870254 | 6.725590875  | -0.679125420 |
| H  | 2.393739459 | 5.982541243  | -4.585695082 |
| H  | 3.155152910 | 5.140336486  | -2.383708223 |
| C  | 3.359023395 | 10.839248037 | -4.852060284 |
| C  | 4.227864584 | 10.256954681 | -5.789213760 |
| C  | 2.440762344 | 11.805322803 | -5.283588734 |
| C  | 4.185215764 | 10.634702589 | -7.119105207 |
| C  | 2.388109843 | 12.167734010 | -6.624536141 |
| C  | 3.259554899 | 11.590578158 | -7.539526788 |
| H  | 4.948972122 | 9.510586711  | -5.454914326 |
| H  | 1.744640213 | 12.245255619 | -4.574383133 |
| H  | 4.870525504 | 10.187158516 | -7.833801266 |
| H  | 1.659771525 | 12.903595427 | -6.953994509 |
| H  | 3.220709165 | 11.883035819 | -8.585533720 |

=====  
**4A**  
=====

|    |             |              |              |
|----|-------------|--------------|--------------|
| C  | 7.348948234 | 9.368242648  | -3.009400583 |
| C  | 7.795799516 | 9.076273607  | -4.312057301 |
| C  | 7.439223000 | 8.371615135  | -2.021403038 |
| C  | 8.316069347 | 7.826985558  | -4.613520754 |
| C  | 7.962441803 | 7.124250189  | -2.325476080 |
| C  | 8.397374146 | 6.853478924  | -3.620313102 |
| H  | 7.740781503 | 9.833168355  | -5.094615241 |
| H  | 7.105549109 | 8.572674162  | -1.004245268 |
| H  | 8.663551370 | 7.609100439  | -5.619709415 |
| H  | 8.034398002 | 6.361247872  | -1.555327276 |
| H  | 8.806896553 | 5.874725593  | -3.857580179 |
| H  | 4.901143865 | 10.765197536 | -3.011273647 |
| C  | 6.452454868 | 11.526105696 | -0.862666423 |
| H  | 6.337875809 | 10.677362288 | -0.182314517 |
| H  | 7.324849311 | 12.108075701 | -0.538282017 |
| H  | 5.571093014 | 12.174115976 | -0.769111843 |
| Si | 6.692901788 | 11.024013998 | -2.624526703 |

|   |             |              |              |
|---|-------------|--------------|--------------|
| C | 6.955368394 | 12.352993724 | -3.884575975 |
| H | 6.701794098 | 13.337424957 | -3.478645477 |
| H | 8.007934836 | 12.369078509 | -4.194054142 |
| H | 6.346389780 | 12.174905982 | -4.781365577 |
| C | 3.744339761 | 10.718189211 | -3.242823024 |
| C | 3.150044056 | 11.735323345 | -2.300240892 |
| C | 3.599919832 | 13.062590757 | -2.357642000 |
| C | 2.168823153 | 11.397038874 | -1.365987862 |
| C | 3.090408700 | 14.023143339 | -1.496257794 |
| C | 1.649014600 | 12.363735376 | -0.508829097 |
| C | 2.110347724 | 13.672595343 | -0.565834513 |
| H | 4.346431741 | 13.346026773 | -3.103456313 |
| H | 1.799414272 | 10.375734669 | -1.312540909 |
| H | 3.450546236 | 15.047908128 | -1.553324088 |
| H | 0.878846033 | 12.086223494 | 0.208834049  |
| H | 1.706692318 | 14.423006441 | 0.109307048  |
| C | 3.398927854 | 9.282299874  | -2.932736418 |
| C | 3.906241385 | 8.684306831  | -1.776239179 |
| C | 2.533764535 | 8.552046603  | -3.747981918 |
| C | 3.574672153 | 7.379012321  | -1.445138907 |
| C | 2.187439671 | 7.247857471  | -3.408863026 |
| C | 2.710341492 | 6.656961440  | -2.264939144 |
| H | 4.555768355 | 9.262183483  | -1.115817457 |
| H | 2.123611233 | 9.006307210  | -4.647530802 |
| H | 3.984061699 | 6.924823674  | -0.545539039 |
| H | 1.506398401 | 6.690613568  | -4.047445146 |
| H | 2.444020711 | 5.634759329  | -2.008901638 |
| C | 3.659206810 | 11.060843698 | -4.708707790 |
| C | 4.471764964 | 10.358221650 | -5.607676046 |
| C | 2.761879856 | 12.005553230 | -5.204871638 |
| C | 4.405852649 | 10.610807500 | -6.969494419 |
| C | 2.686204406 | 12.248294605 | -6.573906993 |
| C | 3.509338910 | 11.560829805 | -7.455870533 |
| H | 5.146079672 | 9.588106492  | -5.228289248 |
| H | 2.109544458 | 12.545811759 | -4.523068336 |
| H | 5.043112751 | 10.059044158 | -7.656213752 |
| H | 1.976182094 | 12.980540723 | -6.949757655 |
| H | 3.450148307 | 11.757349152 | -8.523132185 |

=====  
**5A**  
=====

|   |              |              |              |
|---|--------------|--------------|--------------|
| C | -1.217728800 | -0.257537446 | -2.609031636 |
| C | -2.724579435 | -0.093927238 | -2.661913184 |
| C | -3.363573476 | 1.088812496  | -2.293607027 |
| C | -3.506424753 | -1.186369538 | -3.043596638 |
| C | -4.752862397 | 1.177125718  | -2.308425837 |
| C | -4.891905230 | -1.100590023 | -3.062640422 |
| C | -5.521010416 | 0.085391138  | -2.693819586 |
| H | -2.767779125 | 1.950146467  | -1.997185489 |
| H | -3.012217445 | -2.118044229 | -3.320688347 |
| H | -5.235480273 | 2.108095764  | -2.018713713 |
| H | -5.483876410 | -1.960922554 | -3.367219046 |
| H | -6.606124637 | 0.157113521  | -2.709111604 |
| C | -0.761126330 | -1.041278525 | -1.392980885 |
| C | -1.498878149 | -1.089403520 | -0.211395857 |
| C | 0.473961231  | -1.691480068 | -1.439399777 |
| C | -1.011349172 | -1.773806722 | 0.898720315  |
| C | 0.961214874  | -2.377198896 | -0.335291844 |
| C | 0.217325559  | -2.419986040 | 0.840756102  |
| H | -2.464662193 | -0.589013210 | -0.161205719 |
| H | 1.060572491  | -1.645342834 | -2.357420188 |
| H | -1.598988876 | -1.801987445 | 1.813817118  |
| H | 1.924052542  | -2.880430932 | -0.391242571 |
| H | 0.595370584  | -2.956705719 | 1.707872582  |
| C | -0.485789552 | 1.063530717  | -2.755068315 |
| C | 0.069552908  | 1.738001669  | -1.668841867 |
| C | -0.410932886 | 1.653500494  | -4.018841123 |
| C | 0.687619430  | 2.973178650  | -1.843944707 |



|   |              |              |              |
|---|--------------|--------------|--------------|
| C | 0.207383983  | 2.883537587  | -4.197112319 |
| C | 0.760402066  | 3.548863170  | -3.106376834 |
| H | 0.022173975  | 1.289761941  | -0.677737830 |
| H | -0.855310412 | 1.136561210  | -4.869936338 |
| H | 1.116879189  | 3.486009178  | -0.985884258 |
| H | 0.259443957  | 3.325196793  | -5.189937396 |
| H | 1.247263445  | 4.511901903  | -3.242223667 |
| H | -0.941480347 | -0.862491837 | -3.488754875 |

=====  
**6A**  
=====

|    |              |              |              |
|----|--------------|--------------|--------------|
| C  | -2.624725336 | 0.433110404  | -4.434501679 |
| C  | -3.510211796 | -0.580850138 | -4.864042712 |
| C  | -2.915263901 | 1.779762410  | -4.750159329 |
| C  | -4.643987494 | -0.255910547 | -5.586579500 |
| C  | -4.053632262 | 2.097025419  | -5.468447844 |
| C  | -4.912887840 | 1.079812559  | -5.885613492 |
| H  | -3.306816062 | -1.625068788 | -4.633787442 |
| H  | -2.248259348 | 2.577934101  | -4.427891370 |
| H  | -5.322608729 | -1.036155994 | -5.918595494 |
| H  | -4.277638878 | 3.132235379  | -5.708566213 |
| H  | -5.805726001 | 1.332214963  | -6.452304137 |
| C  | -0.751628936 | -1.711645265 | -3.057442278 |
| H  | -0.325786558 | -1.749632021 | -2.033787677 |
| H  | -1.627511172 | -2.385455338 | -3.118736435 |
| H  | 0.034137976  | -2.097844750 | -3.749638109 |
| Si | -1.145665950 | 0.024703048  | -3.505308792 |
| C  | 0.008723889  | 1.358709647  | -2.985245120 |
| H  | 0.981348570  | 0.923091305  | -2.622805701 |
| H  | 0.199408769  | 2.079798811  | -3.830944868 |
| H  | -0.459120573 | 1.948629805  | -2.129551787 |

=====  
**7A**  
=====

|    |              |              |              |
|----|--------------|--------------|--------------|
| C  | -2.687067223 | -1.827053161 | -1.037553019 |
| C  | -4.085484530 | -1.755762638 | -0.921295981 |
| C  | -1.949634430 | -2.435693435 | -0.006967669 |
| C  | -4.728145240 | -2.282986252 | 0.191154813  |
| C  | -2.592262659 | -2.957711204 | 1.106498165  |
| C  | -3.980988081 | -2.881098775 | 1.203383562  |
| H  | -4.682030416 | -1.294803731 | -1.709708136 |
| H  | -0.862673671 | -2.508943678 | -0.074580278 |
| H  | -5.812090533 | -2.231069568 | 0.268964331  |
| H  | -2.013827806 | -3.429318307 | 1.898166551  |
| H  | -4.484548896 | -3.293851048 | 2.073927436  |
| H  | -1.276532612 | 0.281050408  | -1.913004319 |
| C  | -0.235942664 | -1.936623911 | -3.004189847 |
| H  | 0.461550196  | -2.021986503 | -2.164046171 |
| H  | -0.431268968 | -2.950150969 | -3.374453196 |
| H  | 0.249904287  | -1.376176018 | -3.811054793 |
| Si | -1.839155951 | -1.139718717 | -2.515994155 |
| C  | -2.935887285 | -0.568426764 | -3.898745485 |
| H  | -2.346779278 | -0.168973047 | -4.732090707 |
| H  | -3.527877827 | -1.412610161 | -4.272422419 |
| H  | -3.636974968 | 0.208475771  | -3.571310810 |
| C  | -0.571075333 | 2.014848265  | -3.917828104 |
| C  | 0.446768399  | 1.457890926  | -4.708979573 |
| C  | -1.604345440 | 2.722030531  | -4.551843463 |
| C  | 0.420226183  | 1.585317156  | -6.091850704 |
| C  | -1.626990209 | 2.856836578  | -5.934386192 |
| C  | -0.619424480 | 2.281410162  | -6.703754657 |
| H  | 1.276080968  | 0.924924540  | -4.242466904 |
| H  | -2.402147930 | 3.174044963  | -3.962534522 |
| H  | 1.213231203  | 1.149941867  | -6.694078750 |
| H  | -2.429880569 | 3.410635399  | -6.413714379 |
| H  | -0.639690924 | 2.382577827  | -7.785757250 |
| C  | 1.034819979  | 1.443572986  | -1.275003466 |
| H  | 0.899970619  | 1.114492463  | -0.239167027 |

|    |              |             |              |
|----|--------------|-------------|--------------|
| H  | 1.623669323  | 0.686107683 | -1.803402830 |
| H  | 1.624911252  | 2.368054986 | -1.258699790 |
| Si | -0.599355218 | 1.759700243 | -2.094911393 |
| C  | -1.857131986 | 2.750435729 | -1.157088145 |
| H  | -2.869163801 | 2.585499634 | -1.544637665 |
| H  | -1.853272295 | 2.485917690 | -0.095086443 |
| H  | -1.638222874 | 3.821675401 | -1.240389243 |

=====

**7A-TS**

=====

|    |              |              |              |
|----|--------------|--------------|--------------|
| C  | -3.034402502 | -0.785322040 | -1.485553031 |
| C  | -4.320242173 | -0.219620804 | -1.399069788 |
| C  | -2.577095139 | -1.610466749 | -0.439746412 |
| C  | -5.128162379 | -0.480607221 | -0.301555208 |
| C  | -3.388832565 | -1.873798966 | 0.651279590  |
| C  | -4.662025168 | -1.307304623 | 0.718717406  |
| H  | -4.695449000 | 0.423567395  | -2.195275304 |
| H  | -1.578539577 | -2.046328960 | -0.480973727 |
| H  | -6.121362548 | -0.043655443 | -0.239858152 |
| H  | -3.034722320 | -2.517694742 | 1.452799970  |
| H  | -5.296582857 | -1.512716237 | 1.577599333  |
| H  | -0.557062471 | 0.412145947  | -1.287854862 |
| C  | -0.625830523 | -1.697773726 | -3.305828001 |
| H  | 0.138465147  | -1.673842909 | -2.521240521 |
| H  | -1.034970291 | -2.717614527 | -3.338959464 |
| H  | -0.155752463 | -1.478417796 | -4.269996834 |
| Si | -2.021792596 | -0.537048987 | -2.973536206 |
| C  | -2.837367310 | 0.306816323  | -4.393091182 |
| H  | -2.110512103 | 0.615425693  | -5.151123660 |
| H  | -3.528074636 | -0.418664633 | -4.848684576 |
| H  | -3.420172182 | 1.181489200  | -4.087008004 |
| C  | -0.342878147 | 2.202441510  | -3.239063771 |
| C  | 0.544557178  | 1.476839500  | -4.054241939 |
| C  | -1.167649960 | 3.157517633  | -3.853010244 |
| C  | 0.591932803  | 1.679041487  | -5.429977613 |
| C  | -1.119756314 | 3.370351273  | -5.226378717 |
| C  | -0.245316555 | 2.626101070  | -6.016288322 |
| H  | 1.225364739  | 0.750730786  | -3.602423424 |
| H  | -1.858006912 | 3.747580113  | -3.249180723 |
| H  | 1.288576923  | 1.112233765  | -6.043901081 |
| H  | -1.762222824 | 4.118680611  | -5.685066937 |
| H  | -0.208715021 | 2.792355523  | -7.090363120 |
| C  | 1.313591792  | 2.301283587  | -0.614012549 |
| H  | 1.341900576  | 2.029119100  | 0.446141631  |
| H  | 2.126148581  | 1.772439093  | -1.123951292 |
| H  | 1.514142301  | 3.376011534  | -0.693770084 |
| Si | -0.339596541 | 1.907392656  | -1.382946394 |
| C  | -1.801814674 | 2.741567831  | -0.571931891 |
| H  | -2.747240699 | 2.461724430  | -1.054150536 |
| H  | -1.875385062 | 2.467399807  | 0.485914413  |
| H  | -1.711643920 | 3.833113230  | -0.624277094 |

=====

**8A**

=====

|   |              |              |              |
|---|--------------|--------------|--------------|
| C | -0.248228344 | -1.924347936 | -2.873626269 |
| C | 0.166305583  | -2.108714253 | -4.231100659 |
| C | -0.293519464 | -3.103518855 | -2.066288774 |
| C | 0.548255768  | -3.341507010 | -4.720628153 |
| C | 0.085147134  | -4.340059689 | -2.551783237 |
| C | 0.511785090  | -4.453366751 | -3.875807457 |
| H | 0.188226934  | -1.241706709 | -4.893396046 |
| H | -0.615125483 | -3.017463734 | -1.027706852 |
| H | 0.871061120  | -3.451213819 | -5.751978449 |
| H | 0.057902434  | -5.216475704 | -1.910768847 |
| H | 0.817586379  | -5.424789677 | -4.257666356 |
| H | -1.447507420 | 0.586413731  | -2.912404126 |
| C | -2.971402999 | -1.423655241 | -4.109401561 |

H -2.573362116 -1.175809957 -5.098687424  
H -3.083574796 -2.513761350 -4.050219418  
H -3.970819918 -0.981836830 -4.031150075  
Si -1.877906404 -0.819097070 -2.723256620  
C -2.676021731 -1.115868673 -1.063970364  
H -3.545130289 -0.453844584 -0.972648572  
H -3.047570128 -2.144850452 -0.992835040  
H -2.025846992 -0.918248896 -0.206656945  
C 2.718167259 -1.936839364 -1.939837926  
C 2.952002319 -2.642917102 -0.750483673  
C 3.601323753 -2.129620534 -3.011402146  
C 4.028189883 -3.513500369 -0.636445212  
C 4.678541929 -3.000856082 -2.901216797  
C 4.890775194 -3.693017574 -1.713630353  
H 2.290477466 -2.508742802 0.106275779  
H 3.455930276 -1.588911821 -3.947050850  
H 4.200364693 -4.047331324 0.294722703  
H 5.358356991 -3.134284745 -3.738892037  
H 5.736130430 -4.370715472 -1.624234259  
C 0.703820810 -0.163181148 -0.410520623  
H -0.082233637 0.595152293 -0.491795114  
H 0.360488045 -0.955791873 0.262802290  
H 1.567278962 0.314878534 0.070643374  
Si 1.279912564 -0.772513569 -2.076099522  
C 1.597624851 0.623491346 -3.268661231  
H 2.037769142 0.292562819 -4.214725872  
H 0.702351821 1.213851701 -3.488482704  
H 2.323504865 1.295431738 -2.793066970

=====  
**8A-TS**  
=====

C -0.624654123 -1.403700836 -2.523005755  
C -0.653212721 -1.559567266 -3.933844406  
C -1.471825355 -2.266800619 -1.775356150  
C -1.414620621 -2.540299775 -4.538851618  
C -2.265264675 -3.254970755 -2.399396551  
C -2.227267487 -3.392323376 -3.771842386  
H -0.022761784 -0.918935512 -4.549615092  
H -1.390474907 -2.277674413 -0.687171859  
H -1.381945433 -2.659950081 -5.619171915  
H -2.885014387 -3.909012702 -1.790820109  
H -2.816335811 -4.163344599 -4.261029696  
H -1.752834667 0.962580267 -2.078362497  
C -3.806568782 -0.428924313 -3.331963404  
H -3.374796087 -0.389510815 -4.334696020  
H -4.417048294 -1.331766728 -3.238130492  
H -4.477097246 0.434949997 -3.228966351  
Si -2.564989858 -0.266157690 -1.965700338  
C -3.310448883 -0.427370724 -0.266422683  
H -3.995169167 0.417474920 -0.118195086  
H -3.890760929 -1.351675895 -0.171415229  
H -2.565165313 -0.393206109 0.534305322  
C 2.253239941 -1.680913313 -1.890692634  
C 2.384334099 -2.733535125 -0.972298044  
C 3.155168886 -1.613865962 -2.962348542  
C 3.385333049 -3.685968513 -1.116643726  
C 4.157484535 -2.565283544 -3.110753915  
C 4.271583672 -3.601338583 -2.187901603  
H 1.700992959 -2.810975432 -0.123543918  
H 3.084829742 -0.803022423 -3.689555681  
H 3.479029063 -4.492746176 -0.392436046  
H 4.853896326 -2.495974215 -3.943870900  
H 5.056370602 -4.344955677 -2.302013101  
C 0.463806516 -0.076980974 0.061917270  
H -0.300624356 0.702108783 0.169026680  
H 0.150537273 -0.955478350 0.639087458  
H 1.373131579 0.302203570 0.543672052  
Si 0.864888108 -0.452426693 -1.728162799

|   |             |             |              |
|---|-------------|-------------|--------------|
| C | 1.173792688 | 1.101914996 | -2.716844032 |
| H | 1.302439627 | 0.918585043 | -3.789683016 |
| H | 0.369536680 | 1.835896679 | -2.594868979 |
| H | 2.099249584 | 1.570682420 | -2.361254765 |

=====  
**9A**  
=====

|    |              |              |              |
|----|--------------|--------------|--------------|
| C  | -0.555798476 | -1.691579682 | -2.246270670 |
| C  | -0.503720125 | -2.306126150 | -3.498815100 |
| C  | -1.723867941 | -1.935176650 | -1.451681411 |
| C  | -1.510049103 | -3.167642724 | -3.929163048 |
| C  | -2.703038454 | -2.888686942 | -1.872098804 |
| C  | -2.613884217 | -3.467427751 | -3.119428569 |
| H  | 0.365480342  | -2.146054348 | -4.137017433 |
| H  | -1.655963068 | -1.731931458 | -0.374494882 |
| H  | -1.428506058 | -3.634513380 | -4.908646061 |
| H  | -3.531738819 | -3.127527546 | -1.208240619 |
| H  | -3.368157655 | -4.170921266 | -3.459072232 |
| H  | -1.849929635 | 0.793290550  | -1.207503202 |
| C  | -3.031121867 | 0.090700651  | -3.640152357 |
| H  | -2.090319444 | 0.246260471  | -4.175775685 |
| H  | -3.573872025 | -0.737077542 | -4.108134767 |
| H  | -3.641638802 | 0.993034021  | -3.769201596 |
| Si | -2.786671101 | -0.170191467 | -1.820576036 |
| C  | -4.354982861 | -0.355955223 | -0.839159919 |
| H  | -4.819057630 | 0.630004967  | -0.718511879 |
| H  | -5.075926075 | -1.001190694 | -1.352354248 |
| H  | -4.177056006 | -0.756009129 | 0.164953849  |
| C  | 2.419695564  | -1.670179724 | -2.102049295 |
| C  | 2.650454894  | -2.866560205 | -1.406730873 |
| C  | 3.302255036  | -1.318583531 | -3.131218952 |
| C  | 3.729292294  | -3.681216704 | -1.723578634 |
| C  | 4.384271276  | -2.131944317 | -3.451378978 |
| C  | 4.597138290  | -3.312091105 | -2.747611835 |
| H  | 1.979141160  | -3.168827934 | -0.600482828 |
| H  | 3.154006539  | -0.393501912 | -3.688399033 |
| H  | 3.897775157  | -4.603027030 | -1.172311899 |
| H  | 5.064925688  | -1.842430669 | -4.248128327 |
| H  | 5.443908793  | -3.947039228 | -2.996126565 |
| C  | 0.783445110  | -0.339797342 | 0.169587592  |
| H  | -0.083952367 | 0.274359800  | 0.439067630  |
| H  | 0.724023182  | -1.284615654 | 0.723492355  |
| H  | 1.674669159  | 0.184674928  | 0.532105799  |
| Si | 0.942922755  | -0.620026000 | -1.672604541 |
| C  | 0.913649353  | 0.962140327  | -2.675602264 |
| H  | 0.870407123  | 0.756823985  | -3.752443925 |
| H  | 0.063266556  | 1.603041100  | -2.417487390 |
| H  | 1.825467542  | 1.541599642  | -2.487957152 |

=====  
**9A-TS**  
=====

|    |              |              |              |
|----|--------------|--------------|--------------|
| H  | -3.835787773 | -1.969757915 | -1.361427426 |
| C  | -5.954818249 | -0.154704452 | -1.896690369 |
| H  | -6.140125751 | -0.113448530 | -0.656393051 |
| H  | -6.021147728 | 0.935804129  | -2.399835348 |
| H  | -6.778791904 | -0.943343878 | -2.364395380 |
| Si | -4.292693615 | -0.851224720 | -2.197197437 |
| C  | -5.267311096 | -2.478243113 | -4.731244564 |
| H  | -5.825335026 | -1.531256080 | -4.767399788 |
| H  | -4.627340794 | -2.532990456 | -5.618515015 |
| H  | -4.574442863 | -2.484679937 | -3.850068331 |
| C  | -5.538505554 | -5.533025742 | -4.496491909 |
| C  | -5.796998978 | -6.578792572 | -3.597216845 |
| C  | -4.598942757 | -5.751842976 | -5.515947342 |
| C  | -5.135603905 | -7.797166824 | -3.708422422 |
| C  | -3.934958935 | -6.967775822 | -5.630563736 |
| C  | -4.202580452 | -7.990439415 | -4.723723888 |

|    |              |              |              |
|----|--------------|--------------|--------------|
| H  | -6.526005268 | -6.440975666 | -2.796855450 |
| H  | -4.384045601 | -4.964154243 | -6.241730213 |
| H  | -5.348936558 | -8.597935677 | -3.002962828 |
| H  | -3.209383249 | -7.120467186 | -6.427338123 |
| H  | -3.684030533 | -8.942654610 | -4.811169624 |
| Si | -6.471710205 | -3.923495054 | -4.400836945 |
| C  | -7.888786793 | -3.801304817 | -5.611683846 |
| H  | -8.663309097 | -4.541102886 | -5.381569386 |
| H  | -8.351440430 | -2.806695223 | -5.612888336 |
| H  | -7.534763336 | -4.005905628 | -6.628247738 |
| C  | -3.040279150 | -0.001434812 | -3.227644682 |
| H  | -2.268233776 | -0.691653728 | -3.585241556 |
| H  | -3.495406628 | 0.516663849  | -4.076717377 |
| H  | -2.543839931 | 0.756517172  | -2.600733757 |
| C  | -7.023809433 | -3.591034651 | -2.632732153 |
| C  | -8.270326614 | -3.025738716 | -2.334398270 |
| C  | -6.133956432 | -3.806639433 | -1.568194032 |
| C  | -8.617173195 | -2.689606667 | -1.026944637 |
| C  | -6.473389149 | -3.469588280 | -0.258662283 |
| C  | -7.717580795 | -2.908774853 | 0.011733352  |
| H  | -8.993721008 | -2.856434584 | -3.132107019 |
| H  | -5.170584679 | -4.284255028 | -1.760417819 |
| H  | -9.595340729 | -2.264574528 | -0.818387270 |
| H  | -5.776803017 | -3.666985989 | 0.553678453  |
| H  | -7.992936611 | -2.657066584 | 1.032485247  |

=====  
**10A**  
=====

|    |               |              |              |
|----|---------------|--------------|--------------|
| H  | -1.746505163  | -0.945071323 | -3.120141933 |
| C  | -3.369343430  | -0.045023463 | -1.024444464 |
| H  | -2.737940091  | 0.756954759  | -0.626728721 |
| H  | -4.413676281  | 0.238176094  | -0.845705783 |
| H  | -3.155831517  | -0.948606390 | -0.442668412 |
| Si | -3.046108780  | -0.302530706 | -2.839470597 |
| C  | -4.374056340  | -1.698295673 | -3.382467070 |
| H  | -5.241348357  | -1.051119638 | -3.223325104 |
| H  | -4.038474926  | -1.893513162 | -4.403758516 |
| H  | -4.070424778  | -2.393996141 | -2.594671473 |
| C  | -4.978245347  | -4.765679335 | -3.789666165 |
| C  | -5.033215666  | -5.723788476 | -2.765997110 |
| C  | -4.221677188  | -5.045631375 | -4.938736958 |
| C  | -4.347500824  | -6.926338285 | -2.888669614 |
| C  | -3.536237336  | -6.245429287 | -5.059000228 |
| C  | -3.599743551  | -7.184565031 | -4.032260076 |
| H  | -5.628889684  | -5.535609630 | -1.873267668 |
| H  | -4.170536938  | -4.324752747 | -5.756296126 |
| H  | -4.401335888  | -7.665274843 | -2.093580849 |
| H  | -2.956264129  | -6.454589083 | -5.953821758 |
| H  | -3.065643201  | -8.126409922 | -4.128335337 |
| Si | -5.922581646  | -3.192191349 | -3.644840781 |
| C  | -6.744126522  | -2.597304039 | -5.197793700 |
| H  | -7.572469425  | -3.270734791 | -5.448565370 |
| H  | -7.152929745  | -1.586812259 | -5.088240422 |
| H  | -6.058280766  | -2.602877135 | -6.051962485 |
| C  | -3.393744378  | 1.175665976  | -3.912635086 |
| H  | -3.309644605  | 0.939864681  | -4.978422971 |
| H  | -4.397760421  | 1.573046045  | -3.724604008 |
| H  | -2.678880439  | 1.977495395  | -3.696881786 |
| C  | -6.900801683  | -2.961223192 | -2.096777774 |
| C  | -8.279535237  | -2.720805194 | -2.178243057 |
| C  | -6.304803998  | -3.029496612 | -0.827208462 |
| C  | -9.040989854  | -2.562857283 | -1.025583701 |
| C  | -7.063229415  | -2.866489566 | 0.323415269  |
| C  | -8.433047191  | -2.634705308 | 0.222234761  |
| H  | -8.771600002  | -2.660657766 | -3.148552663 |
| H  | -5.234433779  | -3.223811507 | -0.726968628 |
| H  | -10.109968722 | -2.383038447 | -1.102126018 |
| H  | -6.590661911  | -2.923590052 | 1.300537621  |

H -9.028331814 -2.509956529 1.123083550

=====  
**10A-TS**  
=====

H -7.961181217 -1.008630249 -3.469679405  
C -7.111652725 -3.203206392 -4.893237499  
H -8.111167284 -3.523246742 -5.205757130  
H -6.405630017 -3.505338248 -5.674917096  
H -6.855791333 -3.754102024 -3.978792321  
Si -7.047156427 -1.355453448 -4.601465179  
C -6.998748927 0.833849992 -1.282678973  
H -6.485743647 1.617942455 -1.850132622  
H -7.238915162 1.258696193 -0.298584038  
C -4.183716723 -0.348183960 -0.555649521  
C -3.534018312 0.844016651 -0.930569847  
C -3.484084159 -1.288644130 0.226627761  
C -2.220567561 1.075339965 -0.556764822  
C -2.173612178 -1.046411699 0.607586822  
C -1.542383915 0.129464839 0.209866830  
H -4.053749102 1.591429310 -1.528848970  
H -3.974837983 -2.202307199 0.556877129  
H -1.721797597 1.992000267 -0.858367360  
H -1.642361645 -1.771677976 1.217493065  
H -0.512545539 0.314016804 0.504807362  
Si -5.909695062 -0.632151000 -1.035599712  
C -5.300872663 -0.876713711 -4.026796688  
H -4.893223845 -1.571014070 -3.275368259  
H -4.593776783 -0.931445439 -4.865034614  
H -5.236897617 0.159535286 -3.663439979  
C -7.490694793 -0.353459296 -6.116873363  
H -7.522024160 0.719716995 -5.899749626  
H -6.758521188 -0.513006315 -6.916664654  
H -8.473587653 -0.638637358 -6.506941034  
C -6.619846474 -2.298675336 -0.954221512  
C -8.010177194 -2.455010252 -0.796701439  
C -5.810860306 -3.447868518 -1.059577280  
C -8.569844381 -3.721291754 -0.725341502  
C -6.377016507 -4.711283093 -1.000279597  
C -7.753843184 -4.845534850 -0.827273771  
H -8.658874617 -1.582648335 -0.731640882  
H -4.736957355 -3.351322331 -1.214768220  
H -9.642419602 -3.835588121 -0.597065026  
H -5.749933236 -5.593616744 -1.093010305  
H -8.195894050 -5.837555132 -0.780440895  
H -7.932413704 0.588591249 -1.798020453

=====  
**11A**  
=====

C 5.945808531 10.729287614 -1.042995552  
H 4.602354457 10.843494898 -3.398651483  
C 6.894508743 12.140502395 -3.675908387  
H 6.444332095 13.066770633 -3.303291080  
H 7.962736290 12.171517692 -3.428686689  
H 6.807662575 12.121875232 -4.766743102  
Si 6.115422911 10.648963614 -2.889310626  
C 6.575069848 8.999405260 -3.606361121  
H 6.376830865 8.957502277 -4.683651952  
H 7.646344976 8.815431642 -3.462948399  
H 6.024995201 8.185781729 -3.119525417  
C 2.310261766 11.508823040 -2.252031091  
C 2.681318447 12.862139013 -2.295640886  
C 1.371099279 11.092864351 -1.297461017  
C 2.134659493 13.773390559 -1.403564092  
C 0.818648671 12.008441340 -0.409510889  
C 1.202978362 13.343865222 -0.460850223  
H 3.405767770 13.209326744 -3.035724112  
H 1.061085808 10.049524034 -1.251193737

|    |             |              |              |
|----|-------------|--------------|--------------|
| H  | 2.429479928 | 14.818733344 | -1.441460421 |
| H  | 0.087515283 | 11.679039863 | 0.323930349  |
| H  | 0.773186130 | 14.057582363 | 0.237301250  |
| C  | 3.098252395 | 8.557846304  | -2.979803964 |
| C  | 3.236351271 | 8.183708205  | -1.632001667 |
| C  | 3.104068261 | 7.556065822  | -3.962936880 |
| C  | 3.387588382 | 6.848755177  | -1.281442179 |
| C  | 3.248105381 | 6.220165997  | -3.610494690 |
| C  | 3.395098476 | 5.869201390  | -2.271702935 |
| H  | 3.221338194 | 8.943642042  | -0.850052042 |
| H  | 2.993719466 | 7.818062371  | -5.014909011 |
| H  | 3.493706716 | 6.568222521  | -0.236811963 |
| H  | 3.246216116 | 5.451372389  | -4.378467999 |
| H  | 3.512129924 | 4.824029313  | -1.996650016 |
| C  | 2.793110493 | 10.675719026 | -5.277512666 |
| Si | 3.016416683 | 10.325777691 | -3.470197608 |
| H  | 3.550703800 | 10.170639670 | -5.887101299 |
| H  | 1.806157734 | 10.328738727 | -5.605833963 |
| H  | 2.849465671 | 11.751622427 | -5.473445719 |
| H  | 6.936941659 | 10.838072948 | -0.586314519 |
| H  | 5.343038546 | 11.590679778 | -0.733686966 |
| H  | 5.492186642 | 9.818453196  | -0.638490807 |

=====  
**12A-Me3Si+**

|    |              |              |              |
|----|--------------|--------------|--------------|
| C  | -3.312073205 | -0.300161576 | -1.091388748 |
| H  | -3.160506183 | 0.649229544  | -0.571447702 |
| H  | -4.324198019 | -0.668792945 | -0.872379114 |
| H  | -2.625290462 | -1.052259962 | -0.679762122 |
| Si | -3.083964106 | -0.170878431 | -2.901809628 |
| C  | -3.214562112 | -1.666956893 | -3.946446819 |
| H  | -3.543306229 | -2.548643021 | -3.390253109 |
| H  | -3.895880258 | -1.488492493 | -4.788425522 |
| H  | -2.233816796 | -1.882238427 | -4.395385980 |
| C  | -2.725097208 | 1.450859340  | -3.668510961 |
| H  | -2.534348203 | 1.381205900  | -4.742603089 |
| H  | -3.573754596 | 2.130306377  | -3.504269799 |
| H  | -1.864806566 | 1.922366920  | -3.175267092 |

=====  
**12A-Ph2MeSiH**

|    |              |              |              |
|----|--------------|--------------|--------------|
| H  | 4.314883112  | 11.039400079 | -4.077067935 |
| C  | 2.332314321  | 11.444415041 | -2.258174928 |
| C  | 3.122021421  | 12.398432974 | -1.605717490 |
| C  | 1.022573837  | 11.251299339 | -1.796638372 |
| C  | 2.625362017  | 13.135304576 | -0.534732835 |
| C  | 0.519819411  | 11.983081154 | -0.727059696 |
| C  | 1.322379427  | 12.929014014 | -0.095019814 |
| H  | 4.144796435  | 12.569740070 | -1.942630205 |
| H  | 0.384139911  | 10.507339512 | -2.277220912 |
| H  | 3.256687181  | 13.872161440 | -0.042352272 |
| H  | -0.499412580 | 11.816638240 | -0.384294828 |
| H  | 0.931146059  | 13.504109592 | 0.741292180  |
| C  | 3.255780005  | 8.651722952  | -3.159512308 |
| C  | 3.047147750  | 8.231127497  | -1.839552057 |
| C  | 3.660681639  | 7.691302580  | -4.099382637 |
| C  | 3.234656000  | 6.902150352  | -1.471055123 |
| C  | 3.852248045  | 6.363417828  | -3.738113557 |
| C  | 3.637775218  | 5.967113833  | -2.419882995 |
| H  | 2.730848024  | 8.955158443  | -1.086664709 |
| H  | 3.833773308  | 7.985297596  | -5.137324009 |
| H  | 3.066533141  | 6.595872084  | -0.439547481 |
| H  | 4.168621598  | 5.635219011  | -4.484132988 |
| H  | 3.786307995  | 4.928284446  | -2.132848188 |
| C  | 1.824184720  | 10.488591755 | -5.148378368 |
| Si | 3.007024088  | 10.438833712 | -3.688957028 |
| H  | 2.193908545  | 9.884900690  | -5.985075423 |

H 0.844813794 10.087632782 -4.861403239  
H 1.678732744 11.512903097 -5.507960205

=====  
**13A-Me3SiH**  
=====

C -2.461195359 -0.836356324 -1.265559885  
H -1.923133360 -0.091008810 -0.669483684  
H -3.295797284 -1.207938659 -0.658611958  
H -1.781050487 -1.676185619 -1.445262123  
Si -3.099994222 -0.103414793 -2.876060889  
C -4.000058611 -1.427527580 -3.864015238  
H -4.850818165 -1.817922091 -3.292389838  
H -4.388637016 -1.030090944 -4.808170789  
H -3.343308872 -2.271778987 -4.100872526  
H -1.950526823 0.410793675 -3.674286976  
C -4.279729520 1.312862634 -2.500014822  
H -3.790146591 2.102609904 -1.919575173  
H -4.671626980 1.765392854 -3.417579929  
H -5.134810068 0.951788928 -1.915655251

=====  
**13A-Ph2MeSi+**  
=====

Si -3.613646286 0.120272267 -2.823068149  
C -4.661906794 -0.983375538 -3.860597844  
H -5.188282977 -1.737226014 -3.269631946  
H -5.392355316 -0.403422417 -4.435582425  
H -4.029204941 -1.514442713 -4.584036334  
C -2.821901693 1.534672839 -3.619015533  
C -2.343441588 2.634479371 -2.876122209  
C -2.721094530 1.564215105 -5.025846417  
C -1.771948765 3.717903185 -3.521427653  
C -2.137794457 2.645766951 -5.663833947  
C -1.664194786 3.719004144 -4.911147526  
H -2.444697477 2.650538754 -1.792628163  
H -3.093285552 0.733328828 -5.623716816  
H -1.413888991 4.566967395 -2.946310925  
H -2.053396340 2.659201390 -6.746638529  
H -1.212537143 4.570074330 -5.414435310  
C -3.390745626 -0.232475909 -1.065805150  
C -4.325177838 -1.045591995 -0.391063727  
C -2.278828417 0.265921383 -0.353569152  
C -4.165489927 -1.327350364 0.955280133  
C -2.117455891 -0.032656645 0.988505806  
C -3.063139216 -0.821589416 1.641627784  
H -5.188999918 -1.448328374 -0.917336160  
H -1.525949137 0.865924088 -0.861246390  
H -4.894659690 -1.943972444 1.472781566  
H -1.253820484 0.343285921 1.529521671  
H -2.935640258 -1.050538828 2.696588370

=====  
**1B**  
=====

C -0.487007532 -0.581726567 -1.631880217  
C 0.034075111 -1.792541039 -1.156645453  
C 0.089037828 0.608305892 -1.164173904  
C 1.093364039 -1.818096549 -0.255036357  
C 1.149027193 0.590828130 -0.265268866  
C 1.653150868 -0.624872411 0.190433387  
H -0.396679093 -2.737625539 -1.490432054  
H -0.308730293 1.567648557 -1.500576299  
H 1.480377941 -2.770771447 0.103760568  
H 1.580084558 1.526928574 0.085708638  
H 2.479759754 -0.641570775 0.897688786  
H -1.432543450 -0.297292156 -4.240407211  
C -2.877640984 -2.139507513 -2.761106554  
H -2.271223895 -3.002860879 -3.057228472



|    |              |              |              |
|----|--------------|--------------|--------------|
| H  | -3.232278772 | -2.310095672 | -1.737069529 |
| H  | -3.753307821 | -2.104598049 | -3.417772055 |
| Si | -1.916818166 | -0.527868952 | -2.849932419 |
| C  | -3.021746565 | 0.921848927  | -2.409018128 |
| C  | -3.407497315 | 1.869530537  | -3.364079635 |
| C  | -3.498799759 | 1.075284506  | -1.099486101 |
| C  | -4.242846477 | 2.931191843  | -3.028687132 |
| C  | -4.334017958 | 2.131603305  | -0.757263053 |
| C  | -4.707202528 | 3.061889824  | -1.724496331 |
| H  | -3.045175021 | 1.778720251  | -4.388807819 |
| H  | -3.200472005 | 0.360425096  | -0.329441126 |
| H  | -4.529398108 | 3.659380818  | -3.785412559 |
| H  | -4.692364702 | 2.234532592  | 0.265234605  |
| H  | -5.358464416 | 3.892011989  | -1.458773834 |

=====  
**2B**  
=====

|   |               |               |               |
|---|---------------|---------------|---------------|
| C | -1.2358184993 | 2.8052108999  | -3.0531558142 |
| C | -0.7081322697 | 2.1002633615  | -1.9716002483 |
| C | -1.8183612395 | 2.1288095808  | -4.1249421025 |
| C | -0.7478011253 | 0.7186271734  | -1.9639590926 |
| C | -1.8890457396 | 0.7484977673  | -4.1125458585 |
| C | -1.3457923037 | 0.0147867822  | -3.0340353434 |
| C | -4.7004289516 | -3.4040119070 | -4.8002941132 |
| C | -4.8884181138 | -2.1736200689 | -4.1709085577 |
| C | -3.4348528734 | -3.9876872987 | -4.8531104367 |
| C | -3.8113753066 | -1.5165458579 | -3.6059921403 |
| C | -2.3573845089 | -3.3523830126 | -4.2642215366 |
| C | -2.5243858942 | -2.0984878039 | -3.6336998443 |
| C | -1.4050941680 | -1.4247456909 | -3.0253484838 |
| C | 1.7008466563  | -3.6623832360 | -1.2130341556 |
| C | 2.0000942144  | -2.4663833258 | -1.8650461895 |
| C | -0.6277164051 | -3.4091622181 | -1.7556112220 |
| C | 0.9873163198  | -1.7251986090 | -2.4451830984 |
| C | -0.3481536745 | -2.1872307394 | -2.4093082776 |
| H | -3.9602838742 | -0.5733254895 | -3.0861761919 |
| H | -1.3642774538 | -3.7893174049 | -4.3316163933 |
| H | -3.2934986205 | -4.9376373475 | -5.3604024678 |
| H | -5.5477344493 | -3.9128807378 | -5.2528872010 |
| H | -5.8804755217 | -1.7348094862 | -4.1170693935 |
| H | 1.2216338552  | -0.8095877788 | -2.9822483722 |
| H | 3.0278918358  | -2.1202756017 | -1.9239048573 |
| C | 0.3876410652  | -4.1282949807 | -1.1525475300 |
| H | -2.3132300998 | 0.2164104928  | -4.9605330240 |
| H | -0.3712064852 | 0.1671491698  | -1.1060890922 |
| H | -0.2769946396 | 2.6355936431  | -1.1306775264 |
| H | -1.1926253646 | 3.8912824406  | -3.0611495354 |
| H | -2.2098388718 | 2.6843061763  | -4.9721674564 |
| H | 2.4982742758  | -4.2367161350 | -0.7483387911 |
| H | 0.1602864623  | -5.0505821352 | -0.6259034010 |
| H | -1.6564258288 | -3.7522217038 | -1.6804146358 |

=====  
**3B**  
=====

|    |             |              |              |
|----|-------------|--------------|--------------|
| C  | 6.539462024 | 10.623910130 | -2.838700807 |
| C  | 5.491037229 | 9.728601882  | -2.588369288 |
| C  | 6.843525104 | 11.569347161 | -1.848070924 |
| C  | 4.763918948 | 9.776552198  | -1.404171510 |
| C  | 6.116936779 | 11.628605733 | -0.663133838 |
| C  | 5.073293844 | 10.733973397 | -0.441780195 |
| H  | 5.244186058 | 8.966996687  | -3.332505733 |
| H  | 7.664226739 | 12.271034843 | -2.002390468 |
| H  | 3.956824937 | 9.067402473  | -1.229307641 |
| H  | 6.370396184 | 12.368137241 | 0.093677417  |
| H  | 4.509629183 | 10.775893337 | 0.487548237  |
| H  | 6.624617807 | 9.815714750  | -5.412905038 |
| Si | 7.537675381 | 10.474094631 | -4.418725056 |

C 9.054427176 9.403287943 -4.170496510  
H 9.596613844 9.218986355 -5.104613286  
H 9.744987519 9.885434494 -3.468809176  
H 8.774638734 8.431403449 -3.748923914  
C 4.125060366 10.743916319 -6.648223337  
C 3.439084906 11.060586730 -5.423769778  
C 3.909954752 12.116352324 -4.610610300  
C 2.314597509 10.320649735 -4.987987301  
C 3.297762278 12.408175416 -3.406380577  
C 1.694127538 10.634210827 -3.793777482  
C 2.189674884 11.669328050 -2.997799974  
H 4.799376720 12.662435791 -4.912823438  
H 1.905905959 9.540613180 -5.624540025  
H 3.699359289 13.193232849 -2.770710437  
H 0.814200185 10.080671620 -3.478327133  
H 1.707430939 11.899127301 -2.050571664  
C 4.136693489 9.393744149 -7.157114462  
C 4.129456741 8.284781578 -6.283523629  
C 4.156924429 9.161632189 -8.549478419  
C 4.144838411 6.996786670 -6.785864889  
C 4.144832361 7.869688120 -9.043935051  
C 4.144023147 6.788182413 -8.164747888  
H 4.165775987 8.454153013 -5.210025306  
H 4.125961167 10.006236026 -9.232074854  
H 4.166374061 6.149812912 -6.106079519  
H 4.129001098 7.699947012 -10.116701921  
H 4.144486351 5.774178850 -8.556745256  
C 4.822675917 11.779927636 -7.371025904  
C 6.053544964 11.496312218 -8.003805911  
C 4.316426747 13.097505218 -7.423433293  
C 6.762300300 12.503720782 -8.632842254  
C 5.015087954 14.089466634 -8.085265346  
C 6.245213038 13.797517928 -8.674838481  
H 6.472785977 10.495822228 -7.930372884  
H 3.348982664 13.315345491 -6.978508402  
H 7.729737419 12.288886181 -9.077921911  
H 4.606131954 15.094209206 -8.144810039  
H 6.805248398 14.585483776 -9.172623928  
C 8.035939060 12.166910283 -5.070657009  
C 9.104944500 12.278933882 -5.972187945  
C 7.366407442 13.345245677 -4.708381751  
C 9.482907130 13.510222945 -6.497951390  
C 7.731306591 14.580112704 -5.236554932  
C 8.791358804 14.663103185 -6.134869640  
H 9.664518563 11.388689135 -6.264424265  
H 6.566499515 13.303134335 -3.966667804  
H 10.325093494 13.573330945 -7.184570553  
H 7.201154325 15.480881305 -4.932564325  
H 9.090075394 15.628580047 -6.537714987

=====  
**3B-TS**  
=====

C 6.398637932 10.767669567 -2.847700301  
C 5.517020243 9.779360359 -2.382488246  
C 6.653910902 11.873015114 -2.023585659  
C 4.905326019 9.891833393 -1.141852271  
C 6.048104217 11.985440249 -0.777618644  
C 5.170420971 10.998722231 -0.339569836  
H 5.302690830 8.903061155 -2.997331179  
H 7.343525930 12.648811043 -2.354939392  
H 4.223885242 9.118073536 -0.796779032  
H 6.264739071 12.842018893 -0.144030046  
H 4.696121094 11.088343621 0.634752852  
H 5.821826546 10.585389881 -5.446871770  
Si 7.120638227 10.612940103 -4.551027749  
C 7.966431848 8.992652297 -4.928720938  
H 8.079108532 8.843682261 -6.009316072  
H 8.964798254 8.970413559 -4.476244655

|   |              |              |               |
|---|--------------|--------------|---------------|
| H | 7.403633668  | 8.143692186  | -4.526565558  |
| C | 4.480990856  | 10.732667380 | -6.347141136  |
| C | 3.541941332  | 10.953692064 | -5.241228969  |
| C | 3.721532418  | 12.051051415 | -4.378553431  |
| C | 2.463112107  | 10.084292648 | -5.008062722  |
| C | 2.860133108  | 12.269871711 | -3.319309078  |
| C | 1.590347352  | 10.318123338 | -3.955501762  |
| C | 1.790622123  | 11.401712342 | -3.106320725  |
| H | 4.565183331  | 12.719718596 | -4.538938449  |
| H | 2.285750140  | 9.249291927  | -5.679104273  |
| H | 3.027732568  | 13.108965051 | -2.649722482  |
| H | 0.745928107  | 9.652411084  | -3.799934002  |
| H | 1.109977912  | 11.573478564 | -2.276427838  |
| C | 4.535268066  | 9.397919325  | -6.969699489  |
| C | 4.621607374  | 8.244542980  | -6.172560525  |
| C | 4.464683307  | 9.251841009  | -8.361958556  |
| C | 4.644780158  | 6.987013213  | -6.747585552  |
| C | 4.464703703  | 7.986872573  | -8.935465897  |
| C | 4.560976767  | 6.856098313  | -8.134037534  |
| H | 4.692266854  | 8.353148705  | -5.090718831  |
| H | 4.373891834  | 10.131324821 | -8.992946187  |
| H | 4.729700845  | 6.104133960  | -6.119896608  |
| H | 4.389106812  | 7.886596557  | -10.014635461 |
| H | 4.572039042  | 5.868189339  | -8.586889749  |
| C | 4.923245171  | 11.881784546 | -7.149592139  |
| C | 6.133723333  | 11.811355142 | -7.862017483  |
| C | 4.155129050  | 13.052761008 | -7.237665256  |
| C | 6.568611210  | 12.878669152 | -8.625922823  |
| C | 4.585161204  | 14.114132327 | -8.022228665  |
| C | 5.791929962  | 14.033631419 | -8.708387936  |
| H | 6.744457021  | 10.912332959 | -7.787480005  |
| H | 3.200356991  | 13.113357409 | -6.721923086  |
| H | 7.518598837  | 12.818008806 | -9.149785949  |
| H | 3.971062660  | 15.007000780 | -8.101216153  |
| H | 6.129322250  | 14.871834349 | -9.312626017  |
| C | 8.036904960  | 12.106629017 | -5.165770343  |
| C | 9.242576237  | 11.960862760 | -5.868021097  |
| C | 7.502341006  | 13.398663155 | -5.032675575  |
| C | 9.895788420  | 13.063772220 | -6.406145078  |
| C | 8.146841420  | 14.501753791 | -5.576892285  |
| C | 9.346461355  | 14.334661081 | -6.264251808  |
| H | 9.684275229  | 10.972508100 | -5.994339138  |
| H | 6.568689713  | 13.551323768 | -4.489356683  |
| H | 10.836412328 | 12.932834545 | -6.935403901  |
| H | 7.716636434  | 15.493858142 | -5.463183853  |
| H | 9.855994504  | 15.197223280 | -6.686534895  |

=====  
**4B**  
=====

|    |             |              |              |
|----|-------------|--------------|--------------|
| C  | 6.778917590 | 10.588672893 | -2.806372595 |
| C  | 6.088983959 | 9.444912195  | -2.363831015 |
| C  | 6.802108748 | 11.734883325 | -1.989830947 |
| C  | 5.415603420 | 9.458384006  | -1.152595444 |
| C  | 6.134610317 | 11.739864726 | -0.774540273 |
| C  | 5.435085451 | 10.606965890 | -0.363928104 |
| H  | 6.069927881 | 8.543261036  | -2.976756242 |
| H  | 7.347790895 | 12.622047129 | -2.308369147 |
| H  | 4.873414830 | 8.577842038  | -0.819627855 |
| H  | 6.158056231 | 12.624617431 | -0.144154668 |
| H  | 4.904222193 | 10.616894207 | 0.584740370  |
| H  | 5.569294523 | 10.706131747 | -5.385072005 |
| Si | 7.547414656 | 10.605749329 | -4.449518033 |
| C  | 7.970901440 | 9.006777182  | -5.260673750 |
| H  | 8.657892390 | 9.146535627  | -6.100940516 |
| H  | 8.412629972 | 8.304376523  | -4.545415182 |
| H  | 7.051225188 | 8.545650879  | -5.656275594 |
| C  | 4.689887734 | 10.768554627 | -6.099644156 |
| C  | 3.493375709 | 11.088244995 | -5.227924766 |

|   |              |              |              |
|---|--------------|--------------|--------------|
| C | 3.642982346  | 11.763277264 | -4.017579906 |
| C | 2.206911385  | 10.774370205 | -5.671598196 |
| C | 2.532440850  | 12.118159467 | -3.259698128 |
| C | 1.095880916  | 11.138538141 | -4.921589411 |
| C | 1.255193747  | 11.809214649 | -3.712540746 |
| H | 4.640285200  | 12.011329800 | -3.653212729 |
| H | 2.079215865  | 10.248271113 | -6.616737558 |
| H | 2.667809771  | 12.639003951 | -2.314407266 |
| H | 0.099664190  | 10.894740573 | -5.282601011 |
| H | 0.384170934  | 12.088617611 | -3.125382882 |
| C | 4.572319506  | 9.386732867  | -6.713651718 |
| C | 4.513382085  | 8.287827853  | -5.847528670 |
| C | 4.448095256  | 9.166714975  | -8.084018464 |
| C | 4.361121845  | 6.998612048  | -6.337942886 |
| C | 4.284673704  | 7.874166444  | -8.576533617 |
| C | 4.248374291  | 6.789373144  | -7.710458062 |
| H | 4.551322637  | 8.463783792  | -4.770005243 |
| H | 4.468817782  | 10.008518005 | -8.772395060 |
| H | 4.314530360  | 6.156770196  | -5.651320296 |
| H | 4.180672834  | 7.718624655  | -9.647514874 |
| H | 4.122139162  | 5.782717724  | -8.100297178 |
| C | 5.044997862  | 11.871392937 | -7.073181882 |
| C | 6.213738459  | 11.755151272 | -7.835678222 |
| C | 4.261950163  | 13.015577834 | -7.224557321 |
| C | 6.586470107  | 12.747094803 | -8.730253082 |
| C | 4.631865073  | 14.010480630 | -8.126312107 |
| C | 5.791585082  | 13.881631310 | -8.879087041 |
| H | 6.830596475  | 10.859703778 | -7.737583723 |
| H | 3.350115570  | 13.128978661 | -6.642436000 |
| H | 7.496195781  | 12.635127227 | -9.315810927 |
| H | 4.002042244  | 14.889141918 | -8.242303850 |
| H | 6.074683921  | 14.657915075 | -9.585673064 |
| C | 8.097156755  | 12.176632441 | -5.174832510 |
| C | 9.252571481  | 12.209956846 | -5.977580162 |
| C | 7.346703211  | 13.356662635 | -5.007142893 |
| C | 9.660061528  | 13.395011857 | -6.569836982 |
| C | 7.743800867  | 14.531977597 | -5.624319561 |
| C | 8.901194090  | 14.550725088 | -6.398760836 |
| H | 9.843401641  | 11.307650939 | -6.132500001 |
| H | 6.425643757  | 13.346885465 | -4.424443404 |
| H | 10.562707734 | 13.419218915 | -7.174176342 |
| H | 7.146071109  | 15.432371498 | -5.512671591 |
| H | 9.212305772  | 15.474830425 | -6.879569755 |

=====

**5B**

|   |              |              |              |
|---|--------------|--------------|--------------|
| C | -1.217728800 | -0.257537446 | -2.609031636 |
| C | -2.724579435 | -0.093927238 | -2.661913184 |
| C | -3.363573476 | 1.088812496  | -2.293607027 |
| C | -3.506424753 | -1.186369538 | -3.043596638 |
| C | -4.752862397 | 1.177125718  | -2.308425837 |
| C | -4.891905230 | -1.100590023 | -3.062640422 |
| C | -5.521010416 | 0.085391138  | -2.693819586 |
| H | -2.767779125 | 1.950146467  | -1.997185489 |
| H | -3.012217445 | -2.118044229 | -3.320688347 |
| H | -5.235480273 | 2.108095764  | -2.018713713 |
| H | -5.483876410 | -1.960922554 | -3.367219046 |
| H | -6.606124637 | 0.157113521  | -2.709111604 |
| C | -0.761126330 | -1.041278525 | -1.392980885 |
| C | -1.498878149 | -1.089403520 | -0.211395857 |
| C | 0.473961231  | -1.691480068 | -1.439399777 |
| C | -1.011349172 | -1.773806722 | 0.898720315  |
| C | 0.961214874  | -2.377198896 | -0.335291844 |
| C | 0.217325559  | -2.419986040 | 0.840756102  |
| H | -2.464662193 | -0.589013210 | -0.161205719 |
| H | 1.060572491  | -1.645342834 | -2.357420188 |
| H | -1.598988876 | -1.801987445 | 1.813817118  |
| H | 1.924052542  | -2.880430932 | -0.391242571 |

|   |              |              |              |
|---|--------------|--------------|--------------|
| H | 0.595370584  | -2.956705719 | 1.707872582  |
| C | -0.485789552 | 1.063530717  | -2.755068315 |
| C | 0.069552908  | 1.738001669  | -1.668841867 |
| C | -0.410932886 | 1.653500494  | -4.018841123 |
| C | 0.687619430  | 2.973178650  | -1.843944707 |
| C | 0.207383983  | 2.883537587  | -4.197112319 |
| C | 0.760402066  | 3.548863170  | -3.106376834 |
| H | 0.022173975  | 1.289761941  | -0.677737830 |
| H | -0.855310412 | 1.136561210  | -4.869936338 |
| H | 1.116879189  | 3.486009178  | -0.985884258 |
| H | 0.259443957  | 3.325196793  | -5.189937396 |
| H | 1.247263445  | 4.511901903  | -3.242223667 |
| H | -0.941480347 | -0.862491837 | -3.488754875 |

=====  
**6B**  
=====

|    |              |              |              |
|----|--------------|--------------|--------------|
| Si | -3.613646286 | 0.120272267  | -2.823068149 |
| C  | -4.661906794 | -0.983375538 | -3.860597844 |
| H  | -5.188282977 | -1.737226014 | -3.269631946 |
| H  | -5.392355316 | -0.403422417 | -4.435582425 |
| H  | -4.029204941 | -1.514442713 | -4.584036334 |
| C  | -2.821901693 | 1.534672839  | -3.619015533 |
| C  | -2.343441588 | 2.634479371  | -2.876122209 |
| C  | -2.721094530 | 1.564215105  | -5.025846417 |
| C  | -1.771948765 | 3.717903185  | -3.521427653 |
| C  | -2.137794457 | 2.645766951  | -5.663833947 |
| C  | -1.664194786 | 3.719004144  | -4.911147526 |
| H  | -2.444697477 | 2.650538754  | -1.792628163 |
| H  | -3.093285552 | 0.733328828  | -5.623716816 |
| H  | -1.413888991 | 4.566967395  | -2.946310925 |
| H  | -2.053396340 | 2.659201390  | -6.746638529 |
| H  | -1.212537143 | 4.570074330  | -5.414435310 |
| C  | -3.390745626 | -0.232475909 | -1.065805150 |
| C  | -4.325177838 | -1.045591995 | -0.391063727 |
| C  | -2.278828417 | 0.265921383  | -0.353569152 |
| C  | -4.165489927 | -1.327350364 | 0.955280133  |
| C  | -2.117455891 | -0.032656645 | 0.988505806  |
| C  | -3.063139216 | -0.821589416 | 1.641627784  |
| H  | -5.188999918 | -1.448328374 | -0.917336160 |
| H  | -1.525949137 | 0.865924088  | -0.861246390 |
| H  | -4.894659690 | -1.943972444 | 1.472781566  |
| H  | -1.253820484 | 0.343285921  | 1.529521671  |
| H  | -2.935640258 | -1.050538828 | 2.696588370  |

=====  
**7B**  
=====

|    |              |              |              |
|----|--------------|--------------|--------------|
| C  | -2.618746801 | -1.725024590 | -0.975602941 |
| C  | -3.979747591 | -1.929436901 | -0.707308581 |
| C  | -1.679262122 | -1.992616963 | 0.032620653  |
| C  | -4.389279015 | -2.400697341 | 0.535866835  |
| C  | -2.089591893 | -2.456909089 | 1.275086897  |
| C  | -3.446146130 | -2.662089825 | 1.523809679  |
| H  | -4.723750413 | -1.722714466 | -1.475989671 |
| H  | -0.613913916 | -1.836161257 | -0.154705569 |
| H  | -5.446159115 | -2.562871593 | 0.734695389  |
| H  | -1.356570189 | -2.661289772 | 2.051263772  |
| H  | -3.768638308 | -3.027305168 | 2.496537987  |
| H  | -1.186331584 | 0.150061203  | -2.061163059 |
| C  | -0.695590957 | -2.047630249 | -3.483399912 |
| H  | 0.112687172  | -2.297450632 | -2.785797553 |
| H  | -1.078367167 | -2.990528263 | -3.891677473 |
| H  | -0.275075709 | -1.458574351 | -4.308871690 |
| Si | -2.051157491 | -1.115401231 | -2.621315463 |
| C  | 0.051424382  | 1.575990540  | -4.040851739 |
| C  | 1.375597841  | 1.309817291  | -4.426209594 |
| C  | -0.923026348 | 1.740989479  | -5.040353905 |
| C  | 1.717190872  | 1.211672047  | -5.769953156 |

C -0.581035117 1.632027151 -6.382801192  
C 0.737449085 1.368236743 -6.746226942  
H 2.150902035 1.179407700 -3.671408874  
H -1.961593305 1.937735996 -4.769389728  
H 2.746688262 1.011671082 -6.057589146  
H -1.345217732 1.753433559 -7.146916441  
H 1.004351912 1.285782038 -7.797807616  
C 0.974548435 1.219784896 -1.060533089  
H 0.584511496 1.120667183 -0.041448021  
H 1.501948055 0.294639920 -1.321310008  
H 1.702802833 2.039106739 -1.060641658  
Si -0.400776240 1.571259367 -2.257977940  
C -1.754887824 2.694256557 -1.713963564  
C -2.403389044 2.446824571 -0.493038867  
C -2.182108628 3.768901016 -2.505364358  
C -3.458789907 3.249211639 -0.080019231  
C -3.236534598 4.573775393 -2.089055185  
C -3.875518936 4.310718773 -0.881526361  
H -2.091319550 1.609740501 0.135745879  
H -1.686842384 3.980874338 -3.452467169  
H -3.957389780 3.051162034 0.865569045  
H -3.559525946 5.408127699 -2.706841713  
H -4.701316302 4.940051923 -0.558092086  
C -3.326669225 -0.349043409 -3.705777605  
C -3.396425043 -0.695558002 -5.063488344  
C -4.212421328 0.622463861 -3.209192769  
C -4.328050567 -0.094328809 -5.901082263  
C -5.130693067 1.236550837 -4.052071816  
C -5.190136624 0.875552968 -5.396381012  
H -2.712367371 -1.437646104 -5.475472729  
H -4.171674369 0.920273302 -2.159878037  
H -4.380257941 -0.379102432 -6.948971713  
H -5.802347392 1.996274544 -3.659702279  
H -5.913811820 1.351321426 -6.053680779

=====  
**7B-TS**  
=====

C -0.723443380 -2.701656008 -2.874068404  
C -0.019184162 -2.915312489 -4.070292866  
C -0.580683066 -3.647505116 -1.847140888  
C 0.813168746 -4.018401660 -4.227779319  
C 0.244363533 -4.756106935 -2.002759098  
C 0.947319227 -4.937355704 -3.191310668  
H -0.149533779 -2.218363629 -4.900804023  
H -1.134852193 -3.526750996 -0.914809983  
H 1.348599016 -4.169740147 -5.162767524  
H 0.334518704 -5.486053504 -1.200781748  
H 1.593559789 -5.804034213 -3.313304646  
H -0.861856211 -0.095583515 -2.137249658  
Si -1.790321718 -1.174477811 -2.649998246  
C -3.108256661 -1.451808243 -1.355216569  
H -3.753336995 -0.572229315 -1.261075061  
H -3.738270557 -2.303292956 -1.638385553  
H -2.680783442 -1.663577722 -0.367989336  
C 2.633063275 -1.650934866 -2.147507550  
C 2.763012230 -2.629970698 -1.144715569  
C 3.529961143 -1.667685330 -3.234517823  
C 3.757129472 -3.593227483 -1.227031717  
C 4.519628084 -2.634323840 -3.313383687  
C 4.631638548 -3.595218929 -2.311036488  
H 2.080951488 -2.640483263 -0.295238920  
H 3.468445643 -0.903276437 -4.006261463  
H 3.853332935 -4.343549129 -0.446979751  
H 5.214248320 -2.633922545 -4.149277794  
H 5.413792492 -4.348251163 -2.372001940  
C 0.942843104 0.077841076 -0.192776552  
H 0.289429333 0.952897150 -0.135179827  
H 0.387814764 -0.781694178 0.204999455

|    |              |              |              |
|----|--------------|--------------|--------------|
| H  | 1.819169896  | 0.230063150  | 0.448791277  |
| Si | 1.475698723  | -0.268931518 | -1.927389565 |
| C  | 1.363179102  | 1.002972903  | -3.229707302 |
| C  | 1.2111114571 | 2.352911676  | -2.867142589 |
| C  | 1.386038772  | 0.659388338  | -4.593552606 |
| C  | 1.121208719  | 3.334384826  | -3.844003180 |
| H  | 1.175592869  | 2.643926991  | -1.817306834 |
| C  | 1.274378142  | 1.642036370  | -5.566024188 |
| H  | 1.465605489  | -0.385665656 | -4.894366377 |
| C  | 1.150628062  | 2.977812801  | -5.190494458 |
| H  | 1.022585576  | 4.378416220  | -3.557541105 |
| H  | 1.277881575  | 1.367674926  | -6.617799505 |
| H  | 1.070304618  | 3.747723867  | -5.953801545 |
| C  | -2.380217981 | -0.531468782 | -4.292430217 |
| C  | -2.259486585 | 0.826289177  | -4.614133551 |
| C  | -2.974221660 | -1.390629109 | -5.228871526 |
| C  | -2.721071604 | 1.313595732  | -5.831764157 |
| H  | -1.790939393 | 1.513054485  | -3.905941901 |
| C  | -3.436471200 | -0.906788144 | -6.446485342 |
| H  | -3.068331971 | -2.455027502 | -5.009110513 |
| C  | -3.310231466 | 0.446540095  | -6.746921433 |
| H  | -2.620045713 | 2.370625708  | -6.068098964 |
| H  | -3.895017102 | -1.584106122 | -7.163561029 |
| H  | -3.672251946 | 0.825438656  | -7.699793333 |

=====  
**8B**  
=====

|    |              |              |              |
|----|--------------|--------------|--------------|
| C  | -0.198128402 | -1.884293037 | -2.874100740 |
| C  | 0.228097435  | -2.094601100 | -4.223602291 |
| C  | -0.387240667 | -3.062911310 | -2.086447336 |
| C  | 0.477748017  | -3.356730043 | -4.727517531 |
| C  | -0.126785276 | -4.326657844 | -2.581387935 |
| C  | 0.309630853  | -4.469197345 | -3.900123386 |
| H  | 0.355341096  | -1.226254870 | -4.872965543 |
| H  | -0.750469600 | -2.947695552 | -1.064633667 |
| H  | 0.803911520  | -3.487895582 | -5.755833503 |
| H  | -0.262532133 | -5.203605352 | -1.954714825 |
| H  | 0.515513463  | -5.463501568 | -4.291973463 |
| H  | -1.331250052 | 0.644602283  | -3.169562778 |
| C  | -2.895760080 | -1.473807295 | -4.157392729 |
| H  | -2.491363946 | -1.327449293 | -5.164511626 |
| H  | -3.002003803 | -2.554026249 | -3.990582370 |
| H  | -3.897318650 | -1.031741000 | -4.123242829 |
| Si | -1.811563055 | -0.717438339 | -2.836268098 |
| C  | 2.757421593  | -1.980204668 | -1.902516478 |
| C  | 3.217743982  | -2.474412239 | -0.671900749 |
| C  | 3.456346200  | -2.342806867 | -3.066421509 |
| C  | 4.326622437  | -3.310546055 | -0.608295275 |
| C  | 4.565747655  | -3.175961233 | -3.005716032 |
| C  | 4.999374075  | -3.663457552 | -1.774486716 |
| H  | 2.721104521  | -2.184593709 | 0.254420338  |
| H  | 3.141667810  | -1.962386682 | -4.040518411 |
| H  | 4.672576326  | -3.677747723 | 0.356158416  |
| H  | 5.100559879  | -3.438135660 | -3.917008733 |
| H  | 5.871078382  | -4.311331336 | -1.724102123 |
| Si | 1.321518322  | -0.798500432 | -1.990996725 |
| C  | 1.698952083  | 0.619282314  | -3.145193038 |
| H  | 2.120241284  | 0.272827552  | -4.095877202 |
| H  | 0.840897500  | 1.265822170  | -3.359847093 |
| H  | 2.473027979  | 1.233607220  | -2.667067716 |
| C  | 0.732309400  | -0.233081032 | -0.321814075 |
| C  | 0.393516104  | -1.113574935 | 0.719352002  |
| C  | 0.703107953  | 1.143747826  | -0.055935615 |
| C  | 0.038923032  | -0.637677351 | 1.973568295  |
| C  | 0.359587615  | 1.623835563  | 1.203771849  |
| C  | 0.026387186  | 0.733592067  | 2.217392058  |
| H  | 0.418859527  | -2.192107002 | 0.560238636  |
| H  | 0.958236401  | 1.859113245  | -0.837442491 |

|   |              |              |              |
|---|--------------|--------------|--------------|
| H | -0.222505441 | -1.335413430 | 2.765111094  |
| H | 0.354777260  | 2.694578069  | 1.392960345  |
| H | -0.242017356 | 1.107324208  | 3.202582182  |
| C | -2.618480718 | -0.743583487 | -1.170189228 |
| C | -3.259840154 | -1.895113238 | -0.689049392 |
| C | -2.671723989 | 0.423611347  | -0.397690335 |
| C | -3.910687599 | -1.887279380 | 0.537762616  |
| C | -3.330938895 | 0.436667386  | 0.826187808  |
| C | -3.944021386 | -0.719621408 | 1.296115457  |
| H | -3.262806100 | -2.812007380 | -1.282242098 |
| H | -2.187596768 | 1.333645060  | -0.751765307 |
| H | -4.402974296 | -2.786818336 | 0.899570529  |
| H | -3.363684930 | 1.350816546  | 1.414612934  |
| H | -4.458711157 | -0.711029287 | 2.254018075  |

=====  
**8B-TS**  
=====

|    |              |              |              |
|----|--------------|--------------|--------------|
| C  | -0.732801000 | -2.012800000 | -3.150117000 |
| C  | -0.394456000 | -2.264624000 | -4.499615000 |
| C  | -0.206182000 | -2.909531000 | -2.185727000 |
| C  | 0.377481000  | -3.355285000 | -4.861690000 |
| C  | 0.547042000  | -4.040356000 | -2.562209000 |
| C  | 0.843391000  | -4.256044000 | -3.892314000 |
| H  | -0.770212000 | -1.600901000 | -5.277619000 |
| H  | -0.525820000 | -2.824314000 | -1.145194000 |
| H  | 0.607576000  | -3.528240000 | -5.910555000 |
| H  | 0.908914000  | -4.722539000 | -1.796990000 |
| H  | 1.428213000  | -5.121806000 | -4.190820000 |
| Si | -2.128081000 | -0.767248000 | -2.719352000 |
| Si | 1.365893000  | -1.057227000 | -2.055069000 |
| C  | 1.577389000  | -1.291781000 | -0.228557000 |
| H  | 0.754113000  | 0.219589000  | -2.461242000 |
| C  | -1.883450000 | -0.228272000 | -0.941968000 |
| C  | -1.293474000 | 0.999093000  | -0.604407000 |
| C  | -2.273378000 | -1.081870000 | 0.102967000  |
| C  | -1.078500000 | 1.352413000  | 0.724548000  |
| H  | -1.004102000 | 1.699242000  | -1.388900000 |
| C  | -2.053405000 | -0.737179000 | 1.433200000  |
| H  | -2.776071000 | -2.023055000 | -0.127963000 |
| C  | -1.451618000 | 0.480128000  | 1.743855000  |
| H  | -0.629126000 | 2.312593000  | 0.966498000  |
| H  | -2.365789000 | -1.409209000 | 2.228879000  |
| H  | -1.286858000 | 0.755546000  | 2.782661000  |
| C  | -3.710475000 | -1.741038000 | -2.902731000 |
| C  | -4.928943000 | -1.051935000 | -2.778616000 |
| C  | -3.747151000 | -3.124420000 | -3.129572000 |
| C  | -6.141831000 | -1.721760000 | -2.880493000 |
| H  | -4.932077000 | 0.025086000  | -2.594952000 |
| C  | -4.960278000 | -3.798914000 | -3.228710000 |
| H  | -2.819771000 | -3.692532000 | -3.236011000 |
| C  | -6.156590000 | -3.097268000 | -3.105260000 |
| H  | -7.076821000 | -1.172789000 | -2.784015000 |
| H  | -4.972503000 | -4.872799000 | -3.404784000 |
| H  | -7.105079000 | -3.622853000 | -3.184563000 |
| C  | -2.037418000 | 0.665871000  | -3.919907000 |
| H  | -2.722656000 | 1.463098000  | -3.607854000 |
| H  | -1.034680000 | 1.104275000  | -3.996319000 |
| H  | -2.348606000 | 0.349381000  | -4.921921000 |
| C  | 2.736821000  | -1.536422000 | -3.167849000 |
| C  | 2.864149000  | -0.895592000 | -4.411161000 |
| C  | 3.695470000  | -2.492773000 | -2.794762000 |
| C  | 3.918562000  | -1.205490000 | -5.260243000 |
| H  | 2.132309000  | -0.145869000 | -4.715643000 |
| C  | 4.751046000  | -2.799379000 | -3.641794000 |
| H  | 3.617894000  | -3.001043000 | -1.833153000 |
| C  | 4.858832000  | -2.157317000 | -4.874270000 |
| H  | 4.012990000  | -0.703114000 | -6.219270000 |
| H  | 5.493580000  | -3.534586000 | -3.343341000 |



|   |             |              |              |
|---|-------------|--------------|--------------|
| H | 5.686726000 | -2.397761000 | -5.536563000 |
| H | 2.342672000 | -0.586251000 | 0.118946000  |
| H | 0.647550000 | -1.074704000 | 0.310558000  |
| H | 1.909362000 | -2.305808000 | 0.018211000  |

## =====

**9B**

|    |              |              |              |
|----|--------------|--------------|--------------|
| C  | -3.467549452 | -1.017509046 | -2.635754730 |
| C  | -3.742531831 | -0.070349192 | -3.622080735 |
| C  | -2.850986286 | -2.238362459 | -3.059647040 |
| C  | -3.368936032 | -0.275323232 | -4.949131586 |
| C  | -2.415005226 | -2.404145018 | -4.407056578 |
| C  | -2.699950119 | -1.437891207 | -5.348614801 |
| H  | -4.212747496 | 0.873256408  | -3.345860427 |
| H  | -2.350592179 | -2.842159816 | -2.287509581 |
| H  | -3.587451096 | 0.492499432  | -5.688540512 |
| H  | -1.891009916 | -3.317426671 | -4.684014160 |
| H  | -2.390945587 | -1.564132979 | -6.382220114 |
| H  | -4.839914775 | -3.454666821 | -1.613391993 |
| C  | -5.769777271 | -3.020427834 | -4.235759815 |
| H  | -6.206276225 | -2.059502991 | -3.943282824 |
| H  | -5.388533371 | -2.932583899 | -5.259312751 |
| H  | -6.573968312 | -3.766958071 | -4.243920113 |
| Si | -4.470109457 | -3.583378354 | -3.036312007 |
| C  | -3.311691864 | 1.100388365  | -0.476612989 |
| C  | -2.041693228 | 1.360637277  | 0.056652639  |
| C  | -4.133089797 | 2.194545568  | -0.790505355 |
| C  | -1.601957451 | 2.664618887  | 0.254974131  |
| C  | -3.696333940 | 3.499371226  | -0.593461247 |
| C  | -2.426889983 | 3.735362638  | -0.074126913 |
| H  | -1.390588109 | 0.534144002  | 0.340631926  |
| H  | -5.139476758 | 2.032308009  | -1.179959591 |
| H  | -0.614978101 | 2.845581271  | 0.674004535  |
| H  | -4.350194065 | 4.333423228  | -0.836824327 |
| H  | -2.084224447 | 4.754990928  | 0.083168786  |
| Si | -3.906366133 | -0.640026519 | -0.795627499 |
| C  | -5.773114467 | -0.730724359 | -0.644548593 |
| H  | -6.258035080 | -0.095727035 | -1.396375149 |
| H  | -6.163370947 | -1.746964694 | -0.768805577 |
| H  | -6.089189830 | -0.366646330 | 0.340389687  |
| C  | -3.024537219 | -1.942660655 | 0.212077592  |
| C  | -1.643247889 | -2.157509725 | 0.067243615  |
| C  | -3.722716025 | -2.754858641 | 1.115659157  |
| C  | -0.986856593 | -3.145472197 | 0.794123057  |
| C  | -3.070556691 | -3.744452846 | 1.845821224  |
| C  | -1.703013805 | -3.940941729 | 1.684430065  |
| H  | -1.064442712 | -1.543379007 | -0.626633898 |
| H  | -4.794534123 | -2.615004417 | 1.256428851  |
| H  | 0.083287328  | -3.292736262 | 0.669678753  |
| H  | -3.630176241 | -4.361679952 | 2.544699721  |
| H  | -1.192350598 | -4.712619655 | 2.256177197  |
| C  | -3.679920515 | -5.215258591 | -3.369357410 |
| C  | -3.728407140 | -5.817454959 | -4.635432505 |
| C  | -3.014194990 | -5.876224121 | -2.325307640 |
| C  | -3.131595898 | -7.053837598 | -4.851017587 |
| C  | -2.413638271 | -7.110866234 | -2.543883694 |
| C  | -2.474114012 | -7.698354382 | -3.805361616 |
| H  | -4.242455365 | -5.322181670 | -5.461028781 |
| H  | -2.970363827 | -5.425110236 | -1.330323449 |
| H  | -3.180818866 | -7.518414924 | -5.833081581 |
| H  | -1.902872140 | -7.619838395 | -1.730028787 |
| H  | -2.007987663 | -8.666186075 | -3.974982254 |

## =====

**9B-TS**

=====

|    |               |              |              |
|----|---------------|--------------|--------------|
| H  | -8.357692000  | -1.739665000 | -4.492647000 |
| Si | -7.330507000  | -2.674640000 | -4.976432000 |
| C  | -4.199706000  | -0.388089000 | -0.810750000 |
| C  | -3.330375000  | 0.657729000  | -1.158605000 |
| C  | -3.849629000  | -1.208101000 | 0.269781000  |
| C  | -2.149767000  | 0.871842000  | -0.457323000 |
| C  | -2.668323000  | -0.997706000 | 0.974173000  |
| C  | -1.817762000  | 0.040642000  | 0.609512000  |
| H  | -3.583355000  | 1.326160000  | -1.983798000 |
| H  | -4.508668000  | -2.024084000 | 0.566528000  |
| H  | -1.488502000  | 1.687506000  | -0.739966000 |
| H  | -2.411786000  | -1.643165000 | 1.810803000  |
| H  | -0.894057000  | 0.205986000  | 1.158869000  |
| Si | -5.808613000  | -0.604020000 | -1.730841000 |
| C  | -5.495154000  | -0.618539000 | -3.604054000 |
| H  | -4.760450000  | 0.112939000  | -3.960757000 |
| H  | -5.110346000  | -1.612118000 | -3.890623000 |
| H  | -6.438133000  | -0.381591000 | -4.119958000 |
| C  | -6.544223000  | -2.304744000 | -1.373849000 |
| C  | -7.820122000  | -2.471760000 | -0.814205000 |
| C  | -5.765168000  | -3.457433000 | -1.590757000 |
| C  | -8.296797000  | -3.735538000 | -0.478336000 |
| C  | -6.232742000  | -4.721789000 | -1.250894000 |
| C  | -7.502154000  | -4.859836000 | -0.694585000 |
| H  | -8.437005000  | -1.595232000 | -0.615089000 |
| H  | -4.756255000  | -3.358103000 | -1.998063000 |
| H  | -9.281436000  | -3.843880000 | -0.028320000 |
| H  | -5.610344000  | -5.599239000 | -1.414246000 |
| H  | -7.868803000  | -5.846016000 | -0.417008000 |
| C  | -6.282736000  | -2.250276000 | -6.429993000 |
| C  | -7.030197000  | 0.751520000  | -1.323690000 |
| C  | -8.250594000  | 0.856827000  | -2.009065000 |
| C  | -6.762366000  | 1.685674000  | -0.314423000 |
| C  | -9.170688000  | 1.850674000  | -1.699312000 |
| H  | -8.498159000  | 0.142642000  | -2.799171000 |
| C  | -7.678326000  | 2.685954000  | -0.001355000 |
| H  | -5.822032000  | 1.631882000  | 0.233798000  |
| C  | -8.882281000  | 2.768391000  | -0.692087000 |
| H  | -10.111703000 | 1.913904000  | -2.241014000 |
| H  | -7.451418000  | 3.402342000  | 0.784414000  |
| H  | -9.598456000  | 3.549214000  | -0.448008000 |
| H  | -5.272892000  | -2.663826000 | -6.334282000 |
| H  | -6.739100000  | -2.697821000 | -7.323337000 |
| H  | -6.205223000  | -1.170054000 | -6.576525000 |
| C  | -7.536984000  | -4.385938000 | -4.481396000 |
| C  | -6.662813000  | -5.400838000 | -4.930816000 |
| C  | -8.680852000  | -4.735258000 | -3.732018000 |
| C  | -6.937589000  | -6.725516000 | -4.646638000 |
| H  | -5.772594000  | -5.148018000 | -5.505212000 |
| C  | -8.962622000  | -6.069851000 | -3.477208000 |
| H  | -9.350959000  | -3.961326000 | -3.359914000 |
| C  | -8.090749000  | -7.056999000 | -3.928147000 |
| H  | -6.267266000  | -7.508147000 | -4.991087000 |
| H  | -9.853139000  | -6.339840000 | -2.915927000 |
| H  | -8.308684000  | -8.101802000 | -3.719610000 |

## =====

**10B**

=====

|   |              |              |              |
|---|--------------|--------------|--------------|
| C | -1.946437127 | 0.493562115  | -1.504660238 |
| C | -0.770423924 | 1.249963295  | -1.408289940 |
| C | -2.165774717 | -0.264420085 | -2.666671955 |
| C | 0.158049553  | 1.248877277  | -2.443626134 |
| C | -1.240345681 | -0.264814522 | -3.700113779 |
| C | -0.077727146 | 0.494938077  | -3.586829950 |
| H | -0.575341009 | 1.840514843  | -0.514082219 |

|    |              |              |              |
|----|--------------|--------------|--------------|
| H  | -3.062389865 | -0.882509570 | -2.764357539 |
| H  | 1.067862548  | 1.836817510  | -2.356249621 |
| H  | -1.419108139 | -0.858094890 | -4.593170687 |
| H  | 0.648485019  | 0.494938941  | -4.395758734 |
| H  | -7.566608682 | 2.031445001  | -1.452929855 |
| C  | -6.375060189 | 1.095699109  | -3.830845526 |
| H  | -5.922830733 | 2.064240228  | -4.069718242 |
| H  | -5.687375700 | 0.308856984  | -4.165021675 |
| H  | -7.294497803 | 1.000969441  | -4.418152330 |
| Si | -6.742974335 | 0.940483847  | -2.013770667 |
| C  | -2.912830838 | 1.761710537  | 1.188819246  |
| C  | -2.877267138 | 1.386930936  | 2.539934731  |
| C  | -2.727465779 | 3.112981765  | 0.856023504  |
| C  | -2.658716478 | 2.337617641  | 3.530366369  |
| C  | -2.513144907 | 4.061197924  | 1.845649470  |
| C  | -2.478977600 | 3.671609964  | 3.183000876  |
| H  | -3.011894197 | 0.342538424  | 2.819580942  |
| H  | -2.737663531 | 3.430570741  | -0.188020150 |
| H  | -2.625868272 | 2.035879608  | 4.573932519  |
| H  | -2.368198856 | 5.104630030  | 1.578148851  |
| H  | -2.308209809 | 4.414572749  | 3.957964825  |
| Si | -3.151715320 | 0.474262938  | -0.106141521 |
| C  | -4.971973164 | 1.103378102  | -1.109506016 |
| H  | -4.539720826 | 2.040706176  | -1.463112110 |
| H  | -4.671129155 | 0.174892889  | -1.606278513 |
| H  | -5.372301001 | 1.062960974  | -0.093026176 |
| C  | -3.657300095 | -1.197127728 | 0.497993168  |
| C  | -2.927206515 | -2.331275338 | 0.114361256  |
| C  | -4.761378759 | -1.362959188 | 1.350062662  |
| C  | -3.288410245 | -3.593779356 | 0.572864894  |
| C  | -5.123824376 | -2.622912347 | 1.803436319  |
| C  | -4.384017456 | -3.738251924 | 1.415931005  |
| H  | -2.064965335 | -2.227349026 | -0.543534296 |
| H  | -5.348780786 | -0.500201599 | 1.671798448  |
| H  | -2.710082828 | -4.464593614 | 0.274967645  |
| H  | -5.983119125 | -2.738105936 | 2.459321411  |
| H  | -4.664214152 | -4.725218659 | 1.775917696  |
| C  | -7.315890558 | -0.722425189 | -1.429030559 |
| C  | -6.643219729 | -1.886495225 | -1.831242104 |
| C  | -8.359990120 | -0.838484763 | -0.503236545 |
| C  | -7.002627223 | -3.128520260 | -1.325263607 |
| C  | -8.725288035 | -2.082053546 | 0.002491014  |
| C  | -8.047238306 | -3.224264919 | -0.408392801 |
| H  | -5.825908722 | -1.830825072 | -2.555661174 |
| H  | -8.900178973 | 0.050152413  | -0.176371146 |
| H  | -6.472927872 | -4.022604426 | -1.645543695 |
| H  | -9.543490346 | -2.159810020 | 0.714311881  |
| H  | -8.334277791 | -4.196334365 | -0.014062820 |

=====  
**10B-TS**  
=====

|    |              |              |              |
|----|--------------|--------------|--------------|
| H  | -7.911236719 | -0.893994077 | -3.478811011 |
| C  | -7.469086663 | -3.244572745 | -4.847941880 |
| H  | -8.495932518 | -3.372731810 | -5.205319871 |
| H  | -6.798845794 | -3.698352912 | -5.587544195 |
| H  | -7.361937505 | -3.807577559 | -3.911370824 |
| Si | -7.063696850 | -1.435327849 | -4.583908150 |
| C  | -4.195358868 | -0.804575627 | -0.581863635 |
| C  | -3.338433260 | 0.164708473  | -1.138333736 |
| C  | -3.640368819 | -1.837519680 | 0.197575630  |
| C  | -1.970112149 | 0.092664557  | -0.931535603 |
| C  | -2.271492454 | -1.895513129 | 0.413225455  |
| C  | -1.439058352 | -0.935760669 | -0.155828566 |
| H  | -3.744872757 | 0.969863435  | -1.749555767 |
| H  | -4.284331263 | -2.588406330 | 0.652896963  |
| H  | -1.313531181 | 0.836329871  | -1.374500077 |
| H  | -1.851283429 | -2.688896738 | 1.025104285  |
| H  | -0.365705697 | -0.988071148 | 0.007767047  |

Si -5.991095090 -0.725447440 -0.863457932  
C -5.254127391 -1.254460024 -4.069617896  
H -4.954537897 -1.926794332 -3.253404328  
H -4.607700025 -1.502120945 -4.922129028  
H -5.013185371 -0.217318354 -3.797803333  
C -6.957783748 -2.260813631 -0.835165217  
C -8.345650417 -2.231593848 -0.597664840  
C -6.331449068 -3.502563625 -1.063045548  
C -9.080242998 -3.406627537 -0.587215160  
C -7.070563885 -4.675087539 -1.047238634  
C -8.442987362 -4.625128225 -0.810547818  
H -8.848197213 -1.284549443 -0.408524835  
H -5.262943936 -3.548166730 -1.270072209  
H -10.150105800 -3.377070175 -0.400760302  
H -6.581710253 -5.628755270 -1.226252294  
H -9.022023759 -5.545126359 -0.801922154  
C -6.779042537 0.910648750 -0.927085844  
C -8.049014083 1.146359757 -1.491527630  
C -6.110661863 1.977891816 -0.291059610  
C -8.622569701 2.405686234 -1.424727819  
H -8.574493917 0.350726531 -2.016519275  
C -6.695816580 3.232932078 -0.219165982  
H -5.133601442 1.819346463 0.162696659  
C -7.948568788 3.445899218 -0.786862451  
H -9.596684617 2.581069923 -1.873140796  
H -6.176151101 4.046212585 0.279840149  
H -8.403894081 4.431754016 -0.734315132  
C -7.365489215 -0.374631959 -6.087244591  
C -8.024532630 0.856942102 -5.988349189  
C -6.888914915 -0.771168257 -7.344285815  
C -8.202855998 1.666909635 -7.105181314  
H -8.406399160 1.189940940 -5.021109548  
C -7.066578150 0.032157266 -8.464126360  
H -6.369985345 -1.725615250 -7.454673022  
C -7.725706529 1.252383952 -8.344323391  
H -8.718821313 2.620100051 -7.011964366  
H -6.693224501 -0.292114359 -9.432955780  
H -7.867011730 1.881986943 -9.219922199

=====  
**11B**  
=====

C -7.113579116 1.407377751 0.137177168  
C -6.658075215 0.091721944 0.311999931  
C -7.425663837 1.852618798 -1.159235429  
C -6.526174371 -0.758425033 -0.778859729  
C -7.279985938 1.004304827 -2.248066292  
C -6.834083011 -0.301045061 -2.056207801  
H -6.413917039 -0.272148884 1.309566038  
H -7.780745862 2.870601252 -1.321335419  
H -6.182996359 -1.779293820 -0.633043408  
H -7.518926364 1.360719242 -3.247171580  
H -6.727842697 -0.967550271 -2.908568296  
H -6.120391755 3.656424094 1.251391396  
C -5.237772397 6.055773759 1.912667702  
H -4.895379998 5.582394917 2.840183078  
H -4.542188503 6.867579521 1.670571775  
H -6.221654494 6.502353011 2.092318238  
Si -5.288178321 4.823363817 0.524610301  
C -6.578613631 1.957629427 3.191006938  
C -7.365410200 1.923757783 4.350558220  
C -5.236418478 1.552586550 3.266781895  
C -6.825465097 1.484211471 5.553577897  
C -4.697360669 1.119962925 4.470056794  
C -5.494581568 1.085188005 5.612042736  
H -8.407694967 2.238619367 4.312430893  
H -4.609530526 1.568653035 2.372752852  
H -7.443485025 1.454129106 6.447060908  
H -3.657650120 0.807403211 4.521751349

H -5.073019456 0.744542996 6.554405612  
Si -7.286692609 2.522038034 1.588747543  
C -3.715224591 3.911273749 0.145788591  
H -3.178822800 3.656179951 1.065604401  
H -3.047397788 4.524601450 -0.470661460  
H -3.924443810 2.985278193 -0.403371944  
C -8.778086125 3.594833481 1.676984591  
C -9.860427147 3.412711846 0.805588618  
C -8.827380667 4.640701971 2.613697481  
C -10.962606470 4.257508823 0.865601073  
C -9.924740773 5.489433582 2.666947023  
C -10.990714942 5.296756795 1.789876585  
H -9.843369078 2.602337170 0.077856795  
H -8.000336558 4.788957014 3.310664022  
H -11.801523321 4.104350556 0.191653285  
H -9.956770345 6.296289739 3.394644352  
H -11.852577465 5.958064139 1.834389804  
C -6.322082677 5.245506245 -0.941664390  
C -5.892922830 4.903193781 -2.232795272  
C -7.578975148 5.851719070 -0.786803710  
C -6.695044473 5.160697040 -3.337535219  
C -8.387141597 6.095751068 -1.889481596  
C -7.943333085 5.751875464 -3.163887929  
H -4.924941032 4.424988965 -2.380216488  
H -7.944692602 6.118198077 0.205741213  
H -6.349021524 4.899000171 -4.334241167  
H -9.363145097 6.555677469 -1.755368420  
H -8.574012077 5.947702710 -4.027666554

=====  
**12B-Me2PhSi+**

=====  
C -2.624725336 0.433110404 -4.434501679  
C -3.510211796 -0.580850138 -4.864042712  
C -2.915263901 1.779762410 -4.750159329  
C -4.643987494 -0.255910547 -5.586579500  
C -4.053632262 2.097025419 -5.468447844  
C -4.912887840 1.079812559 -5.885613492  
H -3.306816062 -1.625068788 -4.633787442  
H -2.248259348 2.577934101 -4.427891370  
H -5.322608729 -1.036155994 -5.918595494  
H -4.277638878 3.132235379 -5.708566213  
H -5.805726001 1.332214963 -6.452304137  
C -0.751628936 -1.711645265 -3.057442278  
H -0.325786558 -1.749632021 -2.033787677  
H -1.627511172 -2.385455338 -3.118736435  
H 0.034137976 -2.097844750 -3.749638109  
Si -1.145665950 0.024703048 -3.505308792  
C 0.008723889 1.358709647 -2.985245120  
H 0.981348570 0.923091305 -2.622805701  
H 0.199408769 2.079798811 -3.830944868  
H -0.459120573 1.948629805 -2.129551787

=====  
**12B-Ph3SiH**

=====  
H 4.634065841 11.618441676 -3.395548305  
C 2.218993987 11.777736964 -2.169692944  
C 2.654181350 12.922622433 -1.491853454  
C 0.932971668 11.293860237 -1.888732476  
C 1.837175080 13.565274043 -0.566825208  
C 0.111433117 11.930907649 -0.967157947  
C 0.564421291 13.069667415 -0.304917740  
H 3.651261203 13.318394116 -1.689602273  
H 0.569319919 10.396579709 -2.393766209  
H 2.194772040 14.453345640 -0.048588458  
H -0.883521687 11.539700488 -0.762229255  
H -0.076714032 13.569812162 0.417831567  
C 3.414970692 9.109919979 -3.075579141

|    |             |              |              |
|----|-------------|--------------|--------------|
| C  | 3.244924317 | 8.625031565  | -1.771955511 |
| C  | 3.697310063 | 8.185132253  | -4.090222054 |
| C  | 3.355386707 | 7.267772058  | -1.489967467 |
| C  | 3.808797453 | 6.827183266  | -3.814425713 |
| C  | 3.637958582 | 6.367325819  | -2.512196878 |
| H  | 3.011616552 | 9.320744431  | -0.965140482 |
| H  | 3.820304878 | 8.532573501  | -5.116752055 |
| H  | 3.216557286 | 6.910919977  | -0.471186374 |
| H  | 4.025095775 | 6.124988660  | -4.617299731 |
| H  | 3.720963073 | 5.304554217  | -2.294522212 |
| Si | 3.305366222 | 10.945364103 | -3.450056233 |
| C  | 2.634514990 | 11.185973195 | -5.183503228 |
| C  | 3.189704644 | 12.149151276 | -6.034725163 |
| C  | 1.533631315 | 10.452408196 | -5.647791651 |
| C  | 2.665870509 | 12.376505417 | -7.303133330 |
| H  | 4.050095722 | 12.730498156 | -5.700530029 |
| C  | 1.003638329 | 10.675842727 | -6.912736320 |
| H  | 1.089667381 | 9.682395227  | -5.013975528 |
| C  | 1.570417929 | 11.640299462 | -7.742108495 |
| H  | 3.114008106 | 13.127651707 | -7.951043050 |
| H  | 0.148879845 | 10.095451717 | -7.255411688 |
| H  | 1.158427962 | 11.815354973 | -8.733682521 |

=====  
**13B-Ph3Si+**  
=====

|    |              |              |              |
|----|--------------|--------------|--------------|
| C  | -1.648602067 | 5.916179465  | -0.607315871 |
| C  | -0.425445839 | 6.480550552  | -0.187031674 |
| C  | -1.618416348 | 4.792042346  | -1.459701890 |
| C  | 0.777464639  | 5.958127651  | -0.629460183 |
| C  | -0.411582066 | 4.283316462  | -1.910483633 |
| C  | 0.783411978  | 4.868599262  | -1.498984180 |
| H  | -0.413108514 | 7.309062842  | 0.516732053  |
| H  | -2.545894030 | 4.309457607  | -1.762322221 |
| H  | 1.714352237  | 6.393000835  | -0.293288993 |
| H  | -0.398478154 | 3.422753959  | -2.573198697 |
| H  | 1.729856699  | 4.462976788  | -1.847188874 |
| Si | -3.251780581 | 6.524491041  | -0.020332836 |
| C  | -4.732419129 | 5.486835250  | -0.290946247 |
| C  | -5.096199454 | 5.097857336  | -1.592618380 |
| C  | -5.524935492 | 5.069094941  | 0.792998081  |
| C  | -6.227557966 | 4.321257522  | -1.800982826 |
| C  | -6.643547938 | 4.276149694  | 0.577940795  |
| C  | -6.996103105 | 3.907755836  | -0.717023529 |
| H  | -4.507982381 | 5.418578496  | -2.452285485 |
| H  | -5.257791588 | 5.343110166  | 1.813466384  |
| H  | -6.510412332 | 4.036994084  | -2.810742372 |
| H  | -7.242441404 | 3.944911265  | 1.421772070  |
| H  | -7.876924456 | 3.293181764  | -0.882771298 |
| C  | -3.449155818 | 8.117849401  | 0.820617011  |
| C  | -4.666252750 | 8.391172612  | 1.480390810  |
| C  | -2.457361654 | 9.121101361  | 0.785911740  |
| C  | -4.862589945 | 9.603710062  | 2.120604675  |
| C  | -2.666432917 | 10.336633505 | 1.413998285  |
| C  | -3.862133897 | 10.572172373 | 2.090522356  |
| H  | -5.465381207 | 7.652068197  | 1.482644169  |
| H  | -1.533006533 | 8.964053405  | 0.235592493  |
| H  | -5.799014843 | 9.801593352  | 2.634252825  |
| H  | -1.902013400 | 11.107209342 | 1.373320064  |
| H  | -4.021114116 | 11.526350920 | 2.586233086  |

=====  
**13B-PhMe2SiH**  
=====

|    |               |               |               |
|----|---------------|---------------|---------------|
| Si | -2.2010587379 | -0.2625150744 | -5.5481060162 |
| C  | -2.6788657607 | -1.0648806125 | -7.1795520101 |
| H  | -3.7653490278 | -1.0945225447 | -7.3124363685 |
| H  | -2.2576597553 | -0.4925126476 | -8.0155844398 |
| H  | -2.2990376385 | -2.0898963394 | -7.2525043378 |

|   |               |               |               |
|---|---------------|---------------|---------------|
| C | -2.8382288695 | 1.5023545887  | -5.4966124492 |
| C | -3.7333881975 | 1.9355830959  | -4.5122479262 |
| C | -2.4072408015 | 2.4390713051  | -6.4456565967 |
| C | -4.1876509860 | 3.2507756618  | -4.4780718784 |
| C | -2.8550651381 | 3.7540546952  | -6.4189217706 |
| C | -3.7487863848 | 4.1613299426  | -5.4325180794 |
| H | -4.0857755338 | 1.2309622483  | -3.7585852857 |
| H | -1.7066753146 | 2.1353079380  | -7.2262767533 |
| H | -4.8856353826 | 3.5660649708  | -3.7051247846 |
| H | -2.5087148173 | 4.4642644891  | -7.1668891604 |
| H | -4.1016751052 | 5.1901984642  | -5.4081130981 |
| C | -0.3275528112 | -0.2563249779 | -5.3904088363 |
| H | -0.0016738171 | 0.1921969156  | -4.4463460908 |
| H | 0.0874051585  | -1.2687987057 | -5.4476629645 |
| H | 0.1137408744  | 0.3299197384  | -6.2061851800 |
| H | -2.8219344840 | -0.9939834601 | -4.4082510384 |

=====  
**14B**  
=====

|    |              |              |              |
|----|--------------|--------------|--------------|
| C  | -2.849324962 | 0.579864258  | -4.239672118 |
| C  | -3.616675411 | -0.354133748 | -4.951085081 |
| C  | -3.183722802 | 1.939424383  | -4.331837812 |
| C  | -4.670310582 | 0.062839015  | -5.756890748 |
| C  | -4.250925016 | 2.354926028  | -5.115520373 |
| C  | -4.984768279 | 1.415684850  | -5.838517185 |
| H  | -3.390933149 | -1.417899685 | -4.880217668 |
| H  | -2.619734061 | 2.682748854  | -3.764678676 |
| H  | -5.255585740 | -0.667268814 | -6.310196765 |
| H  | -4.508540109 | 3.409451353  | -5.172267066 |
| H  | -5.817931482 | 1.741082990  | -6.457278100 |
| C  | -1.397434056 | -1.806733068 | -2.824753617 |
| H  | -0.603525174 | -2.049527561 | -2.110720462 |
| H  | -2.348209949 | -2.174722455 | -2.419677143 |
| H  | -1.193933863 | -2.365374468 | -3.749422125 |
| Si | -1.468012186 | 0.024064551  | -3.159027779 |
| C  | 0.146317580  | 0.937333745  | -3.312445639 |
| H  | 0.768069690  | 0.798534431  | -2.419516214 |
| H  | 0.715413100  | 0.575835996  | -4.176855478 |
| H  | -0.020976363 | 2.011539918  | -3.453600890 |
| H  | -1.850199637 | 0.605524019  | -1.701393218 |
| Si | -2.747167806 | 1.004791289  | -0.374635531 |
| C  | -1.845298672 | 2.577707279  | 0.031395566  |
| H  | -2.333206485 | 3.065737071  | 0.885281147  |
| H  | -0.802444768 | 2.397428407  | 0.309835923  |
| H  | -1.867311477 | 3.275750645  | -0.813679670 |
| C  | -4.442325373 | 1.214893252  | -1.038773135 |
| C  | -5.072239408 | 2.467130746  | -0.986060435 |
| C  | -5.094090654 | 0.154805750  | -1.685690615 |
| C  | -6.320207276 | 2.652662856  | -1.568044173 |
| C  | -6.327783419 | 0.347462040  | -2.290624580 |
| C  | -6.941015179 | 1.596223729  | -2.226747886 |
| H  | -4.589004081 | 3.306848631  | -0.487601381 |
| H  | -4.636741183 | -0.836217177 | -1.710663640 |
| H  | -6.810534746 | 3.620569863  | -1.504604569 |
| H  | -6.825500961 | -0.481744249 | -2.786527313 |
| H  | -7.919924297 | 1.740525292  | -2.676936591 |
| C  | -2.396719457 | -0.455248286 | 0.681277842  |
| C  | -3.430292457 | -1.157718484 | 1.314175432  |
| C  | -1.067588583 | -0.842421736 | 0.909005953  |
| C  | -3.139058259 | -2.215393996 | 2.167826113  |
| C  | -0.778428255 | -1.907749195 | 1.747376995  |
| C  | -1.816569421 | -2.588548082 | 2.381142934  |
| H  | -4.467852328 | -0.868581110 | 1.147073155  |
| H  | -0.248559628 | -0.309590313 | 0.419008651  |
| H  | -3.942885422 | -2.748050589 | 2.669029214  |
| H  | 0.252572410  | -2.206903076 | 1.916538048  |
| H  | -1.589248092 | -3.414816403 | 3.049939606  |

=====  
**14B-TS**  
=====

|    |               |               |               |
|----|---------------|---------------|---------------|
| C  | -0.7713736757 | -2.0007758698 | -3.1730520672 |
| C  | -0.4091135838 | -2.2741271814 | -4.5095069124 |
| C  | -0.2613311330 | -2.8779881408 | -2.1850881710 |
| C  | 0.3738601998  | -3.3694016189 | -4.8377477129 |
| C  | 0.5112469596  | -4.0042893410 | -2.5227544272 |
| C  | 0.8337053544  | -4.2440497614 | -3.8440934530 |
| H  | -0.7733684629 | -1.6266273680 | -5.3067157083 |
| H  | -0.5974258015 | -2.7642677227 | -1.1541999441 |
| H  | 0.6213193613  | -3.5619166477 | -5.8791266030 |
| H  | 0.8666362660  | -4.6669775051 | -1.7370543665 |
| H  | 1.4348761611  | -5.1077927228 | -4.1143632861 |
| H  | -1.5289460544 | 0.6347594567  | -2.7984158320 |
| Si | -2.1501141231 | -0.7173681559 | -2.7895887151 |
| C  | -2.8895645280 | -1.0944934699 | -1.1151973254 |
| H  | -3.7387439684 | -0.4273368677 | -0.9292997694 |
| H  | -3.2666727230 | -2.1229630791 | -1.0700923216 |
| H  | -2.1747053779 | -0.9506847807 | -0.2960678039 |
| C  | 2.9114987301  | -2.0378419548 | -1.9253990760 |
| C  | 3.3743099969  | -2.5258611497 | -0.6925568697 |
| C  | 3.6601410357  | -2.3135736943 | -3.0818202081 |
| C  | 4.5405998194  | -3.2747940480 | -0.6211669380 |
| C  | 4.8255990584  | -3.0638368430 | -3.0085579965 |
| C  | 5.2627885298  | -3.5479460814 | -1.7790518224 |
| H  | 2.8366695385  | -2.2969546389 | 0.2255609693  |
| H  | 3.3355423624  | -1.9388284389 | -4.0515745130 |
| H  | 4.8933605481  | -3.6384937681 | 0.3402906467  |
| H  | 5.3996020515  | -3.2656474709 | -3.9090639157 |
| H  | 6.1774541687  | -4.1325474539 | -1.7212906850 |
| Si | 1.3995200314  | -0.9961402393 | -2.0388306258 |
| C  | 1.4825384030  | 0.2086175427  | -3.4483023144 |
| H  | 1.7645307113  | -0.2841240544 | -4.3835546152 |
| H  | 0.5478713643  | 0.7520465062  | -3.6098648790 |
| H  | 2.2721714060  | 0.9332945887  | -3.2065083831 |
| C  | 0.6894845020  | -0.3465096308 | -0.4677782609 |
| C  | 0.4930089396  | -1.1404263960 | 0.6756233820  |
| C  | 0.3864948398  | 1.0219300879  | -0.3926418346 |
| C  | 0.0165045233  | -0.5843528399 | 1.8534947478  |
| H  | 0.7041105826  | -2.2099917044 | 0.6475755280  |
| C  | -0.0917183885 | 1.5788795372  | 0.7883307452  |
| H  | 0.5244910305  | 1.6650298164  | -1.2607422728 |
| C  | -0.2765535733 | 0.7770874704  | 1.9085147613  |
| H  | -0.1306870687 | -1.2102185056 | 2.7296480384  |
| H  | -0.3209677962 | 2.6400713765  | 0.8327661468  |
| H  | -0.6528784958 | 1.2122876720  | 2.8306677230  |
| C  | -3.4021482630 | -0.8540627458 | -4.1710223381 |
| H  | -2.9916971266 | -0.5527177446 | -5.1406607330 |
| H  | -3.7780391877 | -1.8787905671 | -4.2652114109 |
| H  | -4.2582794224 | -0.2025518612 | -3.9647724113 |

=====  
**15B**  
=====

|   |              |              |              |
|---|--------------|--------------|--------------|
| C | -2.307070533 | 0.521714810  | -3.378443919 |
| C | -2.859774173 | -0.746323073 | -3.746149862 |
| C | -1.961327504 | 1.393614113  | -4.459840633 |
| C | -3.007520097 | -1.127237568 | -5.067792214 |
| C | -2.115883318 | 1.020769670  | -5.780573369 |
| C | -2.631925516 | -0.243409534 | -6.080824972 |
| H | -3.153861819 | -1.433518942 | -2.950134025 |
| H | -1.558011981 | 2.380303175  | -4.227816238 |
| H | -3.413386679 | -2.103513999 | -5.317475976 |
| H | -1.843366104 | 1.702133466  | -6.581324996 |
| H | -2.746385555 | -0.540806249 | -7.120760974 |
| C | 0.187292266  | -1.330322434 | -3.391096380 |
| H | 1.205802050  | -1.500206144 | -3.022938369 |
| H | -0.365352164 | -2.269634080 | -3.294884097 |



H 0.263409641 -1.080595271 -4.456551662  
Si -0.583759842 0.071234071 -2.434557829  
C 0.544147091 1.555203479 -2.466447517  
H 1.401730325 1.346845802 -1.815141543  
H 0.936643831 1.706022898 -3.478964188  
H 0.091068025 2.488696306 -2.123354316  
H -1.023052399 -0.332909502 -1.081080088  
Si -3.428679939 1.426204954 -1.952190477  
C -2.415705197 2.681844033 -1.012046404  
H -3.073736834 3.133400306 -0.258257493  
H -1.565849898 2.256741756 -0.468571919  
H -2.053172440 3.492410614 -1.654858208  
C -4.759024271 2.263776494 -2.952431771  
C -5.140757014 3.573208609 -2.630141905  
C -5.439284414 1.615479282 -3.993625290  
C -6.168444509 4.208960773 -3.319039452  
C -6.467620908 2.245585566 -4.681309602  
C -6.833401364 3.545205548 -4.342743934  
H -4.636661436 4.112181928 -1.828893436  
H -5.164209480 0.598959933 -4.278735085  
H -6.450584815 5.224668165 -3.053895351  
H -6.986560660 1.724483552 -5.482117186  
H -7.638191436 4.040636007 -4.879956066  
C -4.078030512 0.080802508 -0.843229909  
C -5.237469192 -0.629621309 -1.192218890  
C -3.463193108 -0.214982151 0.382228883  
C -5.751051143 -1.613962293 -0.357493526  
C -3.977746311 -1.196317679 1.221381877  
C -5.118201139 -1.899560341 0.848648332  
H -5.760349965 -0.395464222 -2.120151299  
H -2.577007789 0.334597169 0.698920283  
H -6.652478460 -2.151381211 -0.641064472  
H -3.491618319 -1.409110823 2.170032001  
H -5.522117019 -2.666135721 1.505221189

=====  
**15B-TS**  
=====

C -0.578311086 -1.494558930 -2.056690454  
C -0.734803617 -2.032912016 -3.362584114  
C -1.478675008 -1.964186549 -1.064839840  
C -1.687801242 -2.990958691 -3.639998913  
C -2.446861267 -2.953114271 -1.348948956  
C -2.547031879 -3.457823753 -2.628363609  
H -0.064750083 -1.699066401 -4.154787064  
H -1.328057885 -1.662650824 -0.023491912  
H -1.769329786 -3.400414467 -4.644689083  
H -3.105800152 -3.304593801 -0.558373630  
H -3.283049822 -4.224581718 -2.856953859  
H -1.408770919 0.894330859 -0.763557196  
C -2.326440811 0.707028210 -3.441924334  
H -1.344416499 0.966679931 -3.850010633  
H -2.806926250 -0.036557987 -4.087928772  
H -2.956799746 1.606656194 -3.450721025  
Si -2.248765230 0.112866409 -1.686666965  
C -3.958191156 -0.200910345 -1.016528487  
H -4.489218235 0.760576189 -0.999042273  
H -4.518640041 -0.876736403 -1.672008157  
H -3.961197853 -0.606550932 -0.000316631  
C 2.377659321 -1.790149689 -2.279506207  
C 2.198895693 -3.181797266 -2.172789097  
C 3.581889629 -1.309060812 -2.822222233  
C 3.183545589 -4.063004017 -2.601994514  
C 4.571682930 -2.188456535 -3.249262571  
C 4.371488094 -3.565158129 -3.142822266  
H 1.275257468 -3.589020014 -1.746668816  
H 3.747492075 -0.233398885 -2.922276735  
H 3.027772903 -5.138958931 -2.513115644  
H 5.498327732 -1.798260331 -3.671356440

|    |             |              |              |
|----|-------------|--------------|--------------|
| H  | 5.142178535 | -4.253385067 | -3.480918407 |
| C  | 1.176285625 | -0.418066531 | 0.228810757  |
| H  | 0.357084692 | 0.161596164  | 0.669962525  |
| H  | 1.198680639 | -1.406547904 | 0.704160273  |
| H  | 2.113282681 | 0.084132530  | 0.496361256  |
| Si | 1.096735954 | -0.599537611 | -1.629813313 |
| C  | 1.151956201 | 1.030449033  | -2.535908222 |
| C  | 0.912382662 | 2.242380619  | -1.870926499 |
| C  | 1.361910820 | 1.068630338  | -3.924445391 |
| C  | 0.862871289 | 3.446473360  | -2.566780567 |
| C  | 1.311451316 | 2.269578457  | -4.624416351 |
| C  | 1.055058241 | 3.458944321  | -3.944860935 |
| H  | 0.768065929 | 2.252298832  | -0.789783180 |
| H  | 1.589114904 | 0.148581624  | -4.467459202 |
| H  | 0.680709302 | 4.377052307  | -2.032864332 |
| H  | 1.480095148 | 2.280727863  | -5.698944092 |
| H  | 1.016618371 | 4.399210453  | -4.490189552 |

=====  
**16B**  
=====

|    |              |              |              |
|----|--------------|--------------|--------------|
| C  | -2.207861185 | 1.384471297  | -2.209895372 |
| C  | -1.936509490 | 0.637750447  | -1.063988447 |
| C  | -2.311004877 | 0.663478732  | -3.448616505 |
| C  | -1.829323649 | -0.750820577 | -1.102049351 |
| C  | -2.319343567 | -0.765449047 | -3.443100452 |
| C  | -2.029989004 | -1.462299109 | -2.288455486 |
| H  | -1.852111697 | 1.142493963  | -0.102138773 |
| H  | -2.799479008 | 1.172412753  | -4.290911674 |
| H  | -1.614859939 | -1.294752002 | -0.184885755 |
| H  | -2.516629696 | -1.297269702 | -4.371430397 |
| H  | -1.994018793 | -2.547407866 | -2.292172670 |
| C  | -0.138220355 | -0.475097626 | -5.546241760 |
| H  | 0.792561650  | -0.254029572 | -6.083535194 |
| H  | -0.053631440 | -1.483571529 | -5.132044792 |
| H  | -0.944525540 | -0.462019175 | -6.288958549 |
| Si | -0.371534288 | 0.840445459  | -4.249596119 |
| C  | -0.317037672 | 2.518432617  | -5.043755054 |
| H  | -1.101507902 | 2.609338045  | -5.805601597 |
| H  | -0.426967889 | 3.357858181  | -4.354070663 |
| H  | 0.650956273  | 2.614579678  | -5.552250385 |
| H  | 0.459859580  | 0.650819719  | -3.044646740 |
| Si | -2.464614868 | 3.283931732  | -1.984244227 |
| C  | -0.797863543 | 3.995987654  | -1.504489779 |
| H  | -0.906469226 | 5.043850899  | -1.200366974 |
| H  | -0.372556001 | 3.453125000  | -0.651881695 |
| H  | -0.058670685 | 3.956210375  | -2.312197447 |
| C  | -3.120256901 | 3.958982944  | -3.595196724 |
| C  | -2.566509247 | 5.114524841  | -4.162444115 |
| C  | -4.173007488 | 3.330648422  | -4.280808449 |
| C  | -3.029317617 | 5.612427711  | -5.376005173 |
| C  | -4.636691570 | 3.822359800  | -5.496032238 |
| C  | -4.059417725 | 4.961998463  | -6.046952248 |
| H  | -1.755626678 | 5.636466980  | -3.653305531 |
| H  | -4.650925159 | 2.444199324  | -3.858027458 |
| H  | -2.586292744 | 6.510452271  | -5.799126625 |
| H  | -5.452847004 | 3.321253777  | -6.010722160 |
| H  | -4.419423103 | 5.348411083  | -6.996989250 |
| C  | -3.672040224 | 3.435737133  | -0.569896340 |
| C  | -5.055471897 | 3.418696404  | -0.796465099 |
| C  | -3.217862844 | 3.545222759  | 0.752711654  |
| C  | -5.953548908 | 3.495431423  | 0.260869294  |
| C  | -4.113857269 | 3.623650074  | 1.812045932  |
| C  | -5.482420444 | 3.594716072  | 1.565769672  |
| H  | -5.440416336 | 3.365928650  | -1.814899206 |
| H  | -2.148961544 | 3.587335110  | 0.965153933  |
| H  | -7.023117542 | 3.485711098  | 0.066681452  |
| H  | -3.744540215 | 3.715743303  | 2.830376387  |
| H  | -6.184367180 | 3.658329964  | 2.393316746  |

=====  
**16B-TS**  
=====

|    |              |              |              |
|----|--------------|--------------|--------------|
| C  | -2.599230112 | 0.297949882  | -3.281029208 |
| C  | -2.250765138 | -1.040833324 | -3.043542475 |
| C  | -2.229921227 | 0.865575118  | -4.512916008 |
| C  | -1.555060512 | -1.783099223 | -3.996364227 |
| C  | -1.555599295 | 0.123468074  | -5.474512592 |
| C  | -1.211581209 | -1.202973151 | -5.214888288 |
| H  | -2.556518506 | -1.516410010 | -2.108627059 |
| H  | -2.515727844 | 1.894271318  | -4.739647267 |
| H  | -1.305250056 | -2.822960959 | -3.801266775 |
| H  | -1.305191214 | 0.571820159  | -6.432241561 |
| H  | -0.691280011 | -1.789544658 | -5.970656564 |
| C  | 0.929568282  | 1.014079190  | -3.177150494 |
| H  | 1.983311438  | 0.699490761  | -3.109079501 |
| H  | 0.397132624  | 0.295207093  | -3.806291101 |
| H  | 0.912705718  | 2.004641347  | -3.642630636 |
| Si | 0.319701146  | 1.052354392  | -1.454258189 |
| C  | 0.971340681  | 2.369223534  | -0.348418155 |
| H  | 2.026815200  | 2.142795886  | -0.138654877 |
| H  | 0.947624479  | 3.341769535  | -0.849473324 |
| H  | 0.442599596  | 2.437752484  | 0.604224863  |
| H  | -0.243324195 | -0.159018339 | -0.841536081 |
| Si | -3.608720976 | 1.313686702  | -2.051956543 |
| C  | -2.304877415 | 2.438397447  | -1.246523591 |
| H  | -2.645669514 | 3.189966808  | -0.525422652 |
| H  | -1.678598076 | 1.755498781  | -0.636879158 |
| H  | -1.718250723 | 2.952753963  | -2.022131321 |
| C  | -4.898845430 | 2.312158766  | -2.941860824 |
| C  | -5.256648738 | 3.590017788  | -2.491997870 |
| C  | -5.588082261 | 1.775330541  | -4.039070734 |
| C  | -6.267927848 | 4.310561847  | -3.116211044 |
| C  | -6.602297735 | 2.491303249  | -4.663391043 |
| C  | -6.940548711 | 3.760236359  | -4.202453740 |
| H  | -4.746646452 | 4.032562775  | -1.635508592 |
| H  | -5.328125334 | 0.783915034  | -4.413457130 |
| H  | -6.534057836 | 5.301136974  | -2.754664356 |
| H  | -7.129606568 | 2.060987193  | -5.511548569 |
| H  | -7.732847134 | 4.322059191  | -4.691026696 |
| C  | -4.327101620 | 0.189143225  | -0.746957038 |
| C  | -5.618278866 | -0.337427112 | -0.926188402 |
| C  | -3.592600105 | -0.224741900 | 0.377872768  |
| C  | -6.151284542 | -1.248672690 | -0.021537151 |
| C  | -4.120376270 | -1.133600681 | 1.287226188  |
| C  | -5.401755869 | -1.648865923 | 1.084493234  |
| H  | -6.222482534 | -0.019262230 | -1.780449629 |
| H  | -2.587852446 | 0.172160785  | 0.565907047  |
| H  | -7.156283262 | -1.643558342 | -0.176148430 |
| H  | -3.536587720 | -1.438682124 | 2.156518821  |
| H  | -5.818383050 | -2.359127756 | 1.794596036  |

=====  
**17B**  
=====

|   |             |              |              |
|---|-------------|--------------|--------------|
| C | 2.380270640 | 0.771617824  | -3.045087768 |
| C | 2.778336000 | -0.199434837 | -2.115413067 |
| C | 3.340400148 | 1.298713909  | -3.924520292 |
| C | 4.098657465 | -0.632349325 | -2.068269434 |
| C | 4.658323986 | 0.868839429  | -3.874278901 |
| C | 5.035806062 | -0.097614339 | -2.944227356 |
| H | 2.049718861 | -0.626108407 | -1.427368386 |
| H | 3.057053193 | 2.044195946  | -4.671169983 |
| H | 4.395656219 | -1.389315532 | -1.347371780 |
| H | 5.393140810 | 1.281015584  | -4.560948480 |
| H | 6.068006850 | -0.436188413 | -2.906071606 |
| C | 2.867477193 | 5.647098882  | -3.470863491 |
| H | 3.152016022 | 6.704283059  | -3.484825610 |
| H | 3.533332994 | 5.134504222  | -2.767976523 |

|    |              |              |              |
|----|--------------|--------------|--------------|
| H  | 3.054058457  | 5.244441795  | -4.473951390 |
| Si | 1.076724829  | 5.439143047  | -3.003126718 |
| C  | -0.130362826 | 5.989336908  | -4.310202260 |
| H  | -0.046193791 | 7.065207848  | -4.496676829 |
| H  | 0.062152235  | 5.473985302  | -5.259231330 |
| H  | -1.165809666 | 5.786232454  | -4.016132030 |
| H  | 0.754705515  | 5.941752692  | -1.651884425 |
| Si | 0.615367300  | 1.294922262  | -3.125790938 |
| C  | 0.815450228  | 3.477574250  | -2.868867449 |
| H  | -0.262423517 | 3.449629226  | -2.689525307 |
| H  | 1.478800939  | 3.242786908  | -2.033199278 |
| H  | 1.178522985  | 3.302966004  | -3.887078241 |
| C  | -0.172196125 | 1.211465049  | -4.792533372 |
| C  | -1.373684196 | 1.882682442  | -5.074949691 |
| C  | 0.425222057  | 0.443395911  | -5.802325588 |
| C  | -1.960000387 | 1.786010513  | -6.328807888 |
| C  | -0.166580042 | 0.342998409  | -7.056548245 |
| C  | -1.355146366 | 1.013907137  | -7.318456052 |
| H  | -1.867949655 | 2.478910027  | -4.305026651 |
| H  | 1.357906458  | -0.084340806 | -5.605383094 |
| H  | -2.890885987 | 2.307038940  | -6.536823822 |
| H  | 0.301486767  | -0.260050125 | -7.830016234 |
| H  | -1.816339252 | 0.935547656  | -8.299598842 |
| C  | -0.446291663 | 0.820842052  | -1.700204117 |
| C  | -1.690456997 | 0.216701123  | -1.934374182 |
| C  | -0.025532768 | 1.014971538  | -0.374654769 |
| C  | -2.489632286 | -0.186040861 | -0.870509721 |
| C  | -0.826006002 | 0.616497327  | 0.685447506  |
| C  | -2.057990768 | 0.015306728  | 0.435631463  |
| H  | -2.033281613 | 0.050343184  | -2.955124127 |
| H  | 0.941992502  | 1.473408224  | -0.164726271 |
| H  | -3.449086234 | -0.659547388 | -1.061598592 |
| H  | -0.491814506 | 0.769394854  | 1.708211463  |
| H  | -2.683664482 | -0.299802137 | 1.266949758  |

=====  
**17B-TS**  
=====

|    |              |              |              |
|----|--------------|--------------|--------------|
| C  | 1.376187164  | 3.311775001  | 1.186980039  |
| C  | 1.972638862  | 4.197574189  | 2.107450727  |
| C  | 2.072710701  | 2.146274454  | 0.810203613  |
| C  | 3.224341671  | 3.922745279  | 2.634415919  |
| C  | 3.327644091  | 1.883072950  | 1.333701003  |
| C  | 3.900134383  | 2.769685465  | 2.244852836  |
| H  | 1.444856673  | 5.094967055  | 2.425165086  |
| H  | 1.633234667  | 1.454932855  | 0.091427356  |
| H  | 3.674762758  | 4.604953426  | 3.350530284  |
| H  | 3.864094412  | 0.987847571  | 1.033750206  |
| H  | 4.883146567  | 2.558555514  | 2.656760617  |
| C  | 2.606520099  | 5.532490420  | -4.125650346 |
| H  | 2.504371538  | 6.583995723  | -4.416014865 |
| H  | 3.537389287  | 5.435601938  | -3.548699125 |
| H  | 2.722489108  | 4.941298706  | -5.045280296 |
| Si | 1.120181011  | 4.932968729  | -3.154500484 |
| C  | -0.477052656 | 5.051559633  | -4.148037735 |
| H  | -0.698467005 | 6.085578584  | -4.439305397 |
| H  | -0.415367197 | 4.446319691  | -5.064850486 |
| H  | -1.336408458 | 4.683031241  | -3.567506631 |
| H  | 0.942922050  | 5.750483095  | -1.905276110 |
| Si | -0.272833124 | 3.654419034  | 0.515130843  |
| C  | 1.382173332  | 3.133861580  | -2.634472621 |
| H  | 0.494804640  | 2.716291427  | -2.134631884 |
| H  | 2.248195259  | 3.018866251  | -1.968030563 |
| H  | 1.558052681  | 2.503645199  | -3.518283447 |
| C  | -1.327516826 | 2.275800426  | -0.014797813 |
| C  | -2.308001103 | 2.462629609  | -1.008208509 |
| C  | -1.178732256 | 1.002418004  | 0.569695055  |
| C  | -3.109984699 | 1.404685622  | -1.406141389 |
| C  | -1.995990665 | -0.047445104 | 0.178035000  |

|   |              |              |              |
|---|--------------|--------------|--------------|
| C | -2.956249639 | 0.154477888  | -0.808985086 |
| H | -2.426294471 | 3.437111364  | -1.482007413 |
| H | -0.429888236 | 0.837988365  | 1.342844577  |
| H | -3.855993794 | 1.550100703  | -2.181897475 |
| H | -1.886034144 | -1.024793431 | 0.640488127  |
| H | -3.591093884 | -0.671720130 | -1.118971706 |
| C | -0.925997480 | 5.343732357  | 0.506643122  |
| C | -2.315607229 | 5.564724985  | 0.546901515  |
| C | -0.055062228 | 6.452014279  | 0.484477284  |
| C | -2.815846917 | 6.856595505  | 0.572400544  |
| C | -0.562355266 | 7.739751331  | 0.500668423  |
| C | -1.939985870 | 7.939029837  | 0.546969003  |
| H | -3.002917128 | 4.720691438  | 0.576556705  |
| H | 1.022018874  | 6.294124115  | 0.429171400  |
| H | -3.887400202 | 7.023423818  | 0.613554964  |
| H | 0.111660897  | 8.591207639  | 0.472365883  |
| H | -2.335479443 | 8.951041521  | 0.561902360  |

=====  
**18B**=====  

|    |              |              |              |
|----|--------------|--------------|--------------|
| C  | -2.092764446 | 5.719172653  | 2.508630466  |
| C  | -1.688420141 | 6.381217026  | 3.676340799  |
| C  | -2.142751734 | 4.316360896  | 2.505526829  |
| C  | -1.335436965 | 5.656633915  | 4.808843909  |
| C  | -1.784056615 | 3.594391586  | 3.634294811  |
| C  | -1.379053385 | 4.267111026  | 4.785314656  |
| H  | -1.658729523 | 7.469644091  | 3.708660420  |
| H  | -2.474753243 | 3.781928321  | 1.612776346  |
| H  | -1.026708128 | 6.177480847  | 5.711325803  |
| H  | -1.823880124 | 2.508338345  | 3.622935643  |
| H  | -1.099888926 | 3.702072802  | 5.671008371  |
| C  | 0.880566469  | 5.650957560  | -0.030867017 |
| H  | 1.040669901  | 6.681269511  | 0.304311432  |
| H  | 0.781261789  | 5.005316390  | 0.849244684  |
| H  | 1.777704592  | 5.333270010  | -0.575537667 |
| Si | -0.604316335 | 5.515679714  | -1.135096132 |
| C  | -0.892517255 | 6.901455338  | -2.335134941 |
| H  | -0.667608389 | 7.874917392  | -1.884135769 |
| H  | -0.253291477 | 6.778200454  | -3.217136531 |
| H  | -1.934067301 | 6.910315990  | -2.679267213 |
| H  | -1.823472023 | 5.690737159  | -0.106548115 |
| Si | -2.622139860 | 6.639384598  | 1.005241407  |
| C  | -0.958581896 | 3.801528344  | -1.761171918 |
| H  | -1.872316149 | 3.764619437  | -2.363206933 |
| H  | -1.048545346 | 3.084957106  | -0.937350393 |
| H  | -0.129917766 | 3.466319287  | -2.397114034 |
| C  | -4.298851745 | 6.334631386  | 0.296765250  |
| C  | -4.563884660 | 5.266242374  | -0.570202303 |
| C  | -5.356493400 | 7.175118224  | 0.677831364  |
| C  | -5.848866856 | 5.044860126  | -1.048565697 |
| C  | -6.641762410 | 6.950542775  | 0.200920274  |
| C  | -6.886317505 | 5.887437897  | -0.662643656 |
| H  | -3.761065821 | 4.593063504  | -0.875217674 |
| H  | -5.178897589 | 8.013606691  | 1.352054037  |
| H  | -6.042940219 | 4.214921206  | -1.722955226 |
| H  | -7.453954499 | 7.606674720  | 0.502371596  |
| H  | -7.891688029 | 5.714823348  | -1.037904887 |
| C  | -1.955347553 | 8.336020254  | 0.771403079  |
| C  | -2.624163774 | 9.235010891  | -0.075206273 |
| C  | -0.726383949 | 8.723875313  | 1.332935350  |
| C  | -2.083728177 | 10.484959861 | -0.348136737 |
| C  | -0.182713160 | 9.970098503  | 1.051006982  |
| C  | -0.862485886 | 10.849048351 | 0.211345680  |
| H  | -3.573061671 | 8.950401350  | -0.529339423 |
| H  | -0.188646773 | 8.044095901  | 1.994465188  |
| H  | -2.612295960 | 11.175143206 | -1.000304705 |
| H  | 0.768653778  | 10.260825698 | 1.488816580  |
| H  | -0.436811917 | 11.825205121 | -0.007277047 |

=====  
**19B-Me3Si+**

=====  
C -3.312073205 -0.300161576 -1.091388748  
H -3.160506183 0.649229544 -0.571447702  
H -4.324198019 -0.668792945 -0.872379114  
H -2.625290462 -1.052259962 -0.679762122  
Si -3.083964106 -0.170878431 -2.901809628  
C -3.214562112 -1.666956893 -3.946446819  
H -3.543306229 -2.548643021 -3.390253109  
H -3.895880258 -1.488492493 -4.788425522  
H -2.233816796 -1.882238427 -4.395385980  
C -2.725097208 1.450859340 -3.668510961  
H -2.534348203 1.381205900 -4.742603089  
H -3.573754596 2.130306377 -3.504269799  
H -1.864806566 1.922366920 -3.175267092

=====  
**19B-Ph3SiH**

=====  
H 4.634065841 11.618441676 -3.395548305  
C 2.218993987 11.777736964 -2.169692944  
C 2.654181350 12.922622433 -1.491853454  
C 0.932971668 11.293860237 -1.888732476  
C 1.837175080 13.565274043 -0.566825208  
C 0.111433117 11.930907649 -0.967157947  
C 0.564421291 13.069667415 -0.304917740  
H 3.651261203 13.318394116 -1.689602273  
H 0.569319919 10.396579709 -2.393766209  
H 2.194772040 14.453345640 -0.048588458  
H -0.883521687 11.539700488 -0.762229255  
H -0.076714032 13.569812162 0.417831567  
C 3.414970692 9.109919979 -3.075579141  
C 3.244924317 8.625031565 -1.771955511  
C 3.697310063 8.185132253 -4.090222054  
C 3.355386707 7.267772058 -1.489967467  
C 3.808797453 6.827183266 -3.814425713  
C 3.637958582 6.367325819 -2.512196878  
H 3.011616552 9.320744431 -0.965140482  
H 3.820304878 8.532573501 -5.116752055  
H 3.216557286 6.910919977 -0.471186374  
H 4.025095775 6.124988660 -4.617299731  
H 3.720963073 5.304554217 -2.294522212  
Si 3.305366222 10.945364103 -3.450056233  
C 2.634514990 11.185973195 -5.183503228  
C 3.189704644 12.149151276 -6.034725163  
C 1.533631315 10.452408196 -5.647791651  
C 2.665870509 12.376505417 -7.303133330  
H 4.050095722 12.730498156 -5.700530029  
C 1.003638329 10.675842727 -6.912736320  
H 1.089667381 9.682395227 -5.013975528  
C 1.570417929 11.640299462 -7.742108495  
H 3.114008106 13.127651707 -7.951043050  
H 0.148879845 10.095451717 -7.255411688  
H 1.158427962 11.815354973 -8.733682521

=====  
**20B-Ph3Si+**

=====  
C -1.648602067 5.916179465 -0.607315871  
C -0.425445839 6.480550552 -0.187031674  
C -1.618416348 4.792042346 -1.459701890  
C 0.777464639 5.958127651 -0.629460183  
C -0.411582066 4.283316462 -1.910483633  
C 0.783411978 4.868599262 -1.498984180  
H -0.413108514 7.309062842 0.516732053  
H -2.545894030 4.309457607 -1.762322221  
H 1.714352237 6.393000835 -0.293288993

|    |              |              |              |
|----|--------------|--------------|--------------|
| H  | -0.398478154 | 3.422753959  | -2.573198697 |
| H  | 1.729856699  | 4.462976788  | -1.847188874 |
| Si | -3.251780581 | 6.524491041  | -0.020332836 |
| C  | -4.732419129 | 5.486835250  | -0.290946247 |
| C  | -5.096199454 | 5.097857336  | -1.592618380 |
| C  | -5.524935492 | 5.069094941  | 0.792998081  |
| C  | -6.227557966 | 4.321257522  | -1.800982826 |
| C  | -6.643547938 | 4.276149694  | 0.577940795  |
| C  | -6.996103105 | 3.907755836  | -0.717023529 |
| H  | -4.507982381 | 5.418578496  | -2.452285485 |
| H  | -5.257791588 | 5.343110166  | 1.813466384  |
| H  | -6.510412332 | 4.036994084  | -2.810742372 |
| H  | -7.242441404 | 3.944911265  | 1.421772070  |
| H  | -7.876924456 | 3.293181764  | -0.882771298 |
| C  | -3.449155818 | 8.117849401  | 0.820617011  |
| C  | -4.666252750 | 8.391172612  | 1.480390810  |
| C  | -2.457361654 | 9.121101361  | 0.785911740  |
| C  | -4.862589945 | 9.603710062  | 2.120604675  |
| C  | -2.666432917 | 10.336633505 | 1.413998285  |
| C  | -3.862133897 | 10.572172373 | 2.090522356  |
| H  | -5.465381207 | 7.652068197  | 1.482644169  |
| H  | -1.533006533 | 8.964053405  | 0.235592493  |
| H  | -5.799014843 | 9.801593352  | 2.634252825  |
| H  | -1.902013400 | 11.107209342 | 1.373320064  |
| H  | -4.021114116 | 11.526350920 | 2.586233086  |

=====  
**20B-Me3SiH**  
=====

|    |              |              |              |
|----|--------------|--------------|--------------|
| C  | -2.461195359 | -0.836356324 | -1.265559885 |
| H  | -1.923133360 | -0.091008810 | -0.669483684 |
| H  | -3.295797284 | -1.207938659 | -0.658611958 |
| H  | -1.781050487 | -1.676185619 | -1.445262123 |
| Si | -3.099994222 | -0.103414793 | -2.876060889 |
| C  | -4.000058611 | -1.427527580 | -3.864015238 |
| H  | -4.850818165 | -1.817922091 | -3.292389838 |
| H  | -4.388637016 | -1.030090944 | -4.808170789 |
| H  | -3.343308872 | -2.271778987 | -4.100872526 |
| H  | -1.950526823 | 0.410793675  | -3.674286976 |
| C  | -4.279729520 | 1.312862634  | -2.500014822 |
| H  | -3.790146591 | 2.102609904  | -1.919575173 |
| H  | -4.671626980 | 1.765392854  | -3.417579929 |
| H  | -5.134810068 | 0.951788928  | -1.915655251 |

=====  
**00-CH3+**  
=====

|   |               |               |               |
|---|---------------|---------------|---------------|
| C | -0.3557214423 | 0.0000000552  | -2.5248120937 |
| H | -1.4301345029 | -0.1733610579 | -2.6647237583 |
| H | 0.2881917378  | -0.8109976818 | -2.1618848172 |
| H | 0.0746792244  | 0.9843575015  | -2.7478450771 |

=====  
**00-CH4**  
=====

|   |               |               |               |
|---|---------------|---------------|---------------|
| C | -0.3557113444 | -0.0000179080 | -2.5263061454 |
| H | -1.3850767864 | -0.0089540051 | -2.1617160967 |
| H | 0.1666775997  | -0.8868096464 | -2.1615834677 |
| H | 0.1511182179  | 0.8958448517  | -2.1617236082 |
| H | -0.3558297126 | 0.0001290505  | -3.6179619499 |

=====  
**1C**  
=====

|    |               |               |               |
|----|---------------|---------------|---------------|
| Si | -2.4415263583 | -0.2887064001 | -5.3676869438 |
| C  | -2.9666261843 | -1.2613862118 | -6.8333765426 |
| H  | -3.7408259081 | -0.7763660019 | -7.4330931803 |
| H  | -2.0960117829 | -1.4587449215 | -7.4713384915 |
| H  | -3.3407123474 | -2.2401177668 | -6.5054900528 |
| C  | -3.2333463702 | 1.2572060491  | -4.9182426220 |
| C  | -4.3020266573 | 1.7808089702  | -5.6786183808 |
| C  | -2.7813367763 | 1.9699611046  | -3.7845432038 |
| C  | -4.8978120409 | 2.9749674282  | -5.3151397210 |
| C  | -3.3810086507 | 3.1640985894  | -3.4279521949 |
| C  | -4.4361661079 | 3.6628098410  | -4.1926720449 |
| H  | -4.6660150587 | 1.2482156716  | -6.5555667396 |
| H  | -1.9587871146 | 1.5873645649  | -3.1824886007 |
| H  | -5.7201469125 | 3.3760987973  | -5.9001464592 |
| H  | -3.0325784266 | 3.7118364874  | -2.5572499371 |
| H  | -4.9056642243 | 4.6015155587  | -3.9093693556 |
| C  | -1.0631991245 | -0.9273562121 | -4.3333247366 |
| H  | -1.3876783169 | -1.0600994734 | -3.2937229793 |
| H  | -0.6908501041 | -1.8859278163 | -4.7051498246 |
| H  | -0.2289370130 | -0.2145684280 | -4.3191424803 |

=====  
**1CH**  
=====

|    |               |               |               |
|----|---------------|---------------|---------------|
| Si | -2.2010587379 | -0.2625150744 | -5.5481060162 |
| C  | -2.6788657607 | -1.0648806125 | -7.1795520101 |
| H  | -3.7653490278 | -1.0945225447 | -7.3124363685 |
| H  | -2.2576597553 | -0.4925126476 | -8.0155844398 |
| H  | -2.2990376385 | -2.0898963394 | -7.2525043378 |
| C  | -2.8382288695 | 1.5023545887  | -5.4966124492 |
| C  | -3.7333881975 | 1.9355830959  | -4.5122479262 |
| C  | -2.4072408015 | 2.4390713051  | -6.4456565967 |
| C  | -4.1876509860 | 3.2507756618  | -4.4780718784 |
| C  | -2.8550651381 | 3.7540546952  | -6.4189217706 |
| C  | -3.7487863848 | 4.1613299426  | -5.4325180794 |
| H  | -4.0857755338 | 1.2309622483  | -3.7585852857 |
| H  | -1.7066753146 | 2.1353079380  | -7.2262767533 |
| H  | -4.8856353826 | 3.5660649708  | -3.7051247846 |
| H  | -2.5087148173 | 4.4642644891  | -7.1668891604 |
| H  | -4.1016751052 | 5.1901984642  | -5.4081130981 |
| C  | -0.3275528112 | -0.2563249779 | -5.3904088363 |
| H  | -0.0016738171 | 0.1921969156  | -4.4463460908 |
| H  | 0.0874051585  | -1.2687987057 | -5.4476629645 |
| H  | 0.1137408744  | 0.3299197384  | -6.2061851800 |
| H  | -2.8219344840 | -0.9939834601 | -4.4082510384 |



## =====

**2C**

|    |               |               |               |
|----|---------------|---------------|---------------|
| Si | -2.4714902510 | -0.2844629970 | -5.3973742910 |
| H  | -1.3724929700 | -0.7432913340 | -4.5361696570 |
| C  | -2.9396819520 | -1.3082061490 | -6.8406319210 |
| H  | -3.7105075720 | -0.8452221370 | -7.4620707480 |
| H  | -2.0538685110 | -1.5059890430 | -7.4573043330 |
| H  | -3.3028685400 | -2.2861021650 | -6.4978056930 |
| C  | -3.2487864960 | 1.2520492820  | -4.9369489820 |
| C  | -4.3201133430 | 1.8010985660  | -5.6817706260 |
| C  | -2.7710604160 | 1.9389710540  | -3.7938542250 |
| C  | -4.8906365170 | 2.9967162810  | -5.2920673600 |
| C  | -3.3493221470 | 3.1355296300  | -3.4134671840 |
| C  | -4.4041648090 | 3.6594896150  | -4.1620830040 |
| H  | -4.7005423750 | 1.2865692590  | -6.5621871020 |
| H  | -1.9479117850 | 1.5287854820  | -3.2105174240 |
| H  | -5.7124667910 | 3.4219382870  | -5.8603867910 |
| H  | -2.9849511970 | 3.6659178070  | -2.5388084450 |
| H  | -4.8567351430 | 4.6009244640  | -3.8605230980 |

## =====

**2CH**

|    |               |               |               |
|----|---------------|---------------|---------------|
| Si | -2.3621424566 | -0.2264831844 | -5.7196286654 |
| H  | -1.1535495119 | -0.4100916392 | -4.8718417492 |
| C  | -2.0170616140 | -0.7356048507 | -7.4959433428 |
| H  | -2.9068101752 | -0.5911753285 | -8.1188247498 |
| H  | -1.2069580204 | -0.1349059756 | -7.9214990929 |
| H  | -1.7331846230 | -1.7907202216 | -7.5623094116 |
| C  | -2.8439044546 | 1.5845756340  | -5.6381462472 |
| C  | -3.8516698568 | 2.0987988253  | -6.4644654236 |
| C  | -2.2167681174 | 2.4615872276  | -4.7459461086 |
| C  | -4.2187744057 | 3.4378702444  | -6.4048094276 |
| C  | -2.5782934082 | 3.8037084403  | -4.6809602129 |
| C  | -3.5820115546 | 4.2919794128  | -5.5096036691 |
| H  | -4.3602480154 | 1.4418657852  | -7.1713468665 |
| H  | -1.4261477388 | 2.0896966000  | -4.0940519869 |
| H  | -5.0047873324 | 3.8175621693  | -7.0542653826 |
| H  | -2.0779089586 | 4.4695429332  | -3.9809491709 |
| H  | -3.8672949497 | 5.3407867088  | -5.4621386443 |
| H  | -3.4520837981 | -1.0770077725 | -5.1686671106 |

## =====

**3C**

|    |              |              |              |
|----|--------------|--------------|--------------|
| Si | -3.613646286 | 0.120272267  | -2.823068149 |
| C  | -4.661906794 | -0.983375538 | -3.860597844 |
| H  | -5.188282977 | -1.737226014 | -3.269631946 |
| H  | -5.392355316 | -0.403422417 | -4.435582425 |
| H  | -4.029204941 | -1.514442713 | -4.584036334 |
| C  | -2.821901693 | 1.534672839  | -3.619015533 |
| C  | -2.343441588 | 2.634479371  | -2.876122209 |
| C  | -2.721094530 | 1.564215105  | -5.025846417 |
| C  | -1.771948765 | 3.717903185  | -3.521427653 |
| C  | -2.137794457 | 2.645766951  | -5.663833947 |
| C  | -1.664194786 | 3.719004144  | -4.911147526 |
| H  | -2.444697477 | 2.650538754  | -1.792628163 |
| H  | -3.093285552 | 0.733328828  | -5.623716816 |
| H  | -1.413888991 | 4.566967395  | -2.946310925 |
| H  | -2.053396340 | 2.659201390  | -6.746638529 |
| H  | -1.212537143 | 4.570074330  | -5.414435310 |
| C  | -3.390745626 | -0.232475909 | -1.065805150 |
| C  | -4.325177838 | -1.045591995 | -0.391063727 |
| C  | -2.278828417 | 0.265921383  | -0.353569152 |
| C  | -4.165489927 | -1.327350364 | 0.955280133  |
| C  | -2.117455891 | -0.032656645 | 0.988505806  |
| C  | -3.063139216 | -0.821589416 | 1.641627784  |
| H  | -5.188999918 | -1.448328374 | -0.917336160 |

|   |              |              |              |
|---|--------------|--------------|--------------|
| H | -1.525949137 | 0.865924088  | -0.861246390 |
| H | -4.894659690 | -1.943972444 | 1.472781566  |
| H | -1.253820484 | 0.343285921  | 1.529521671  |
| H | -2.935640258 | -1.050538828 | 2.696588370  |

=====  
**3CH**  
=====

|    |              |              |              |
|----|--------------|--------------|--------------|
| H  | 4.314883112  | 11.039400079 | -4.077067935 |
| C  | 2.332314321  | 11.444415041 | -2.258174928 |
| C  | 3.122021421  | 12.398432974 | -1.605717490 |
| C  | 1.022573837  | 11.251299339 | -1.796638372 |
| C  | 2.625362017  | 13.135304576 | -0.534732835 |
| C  | 0.519819411  | 11.983081154 | -0.727059696 |
| C  | 1.322379427  | 12.929014014 | -0.095019814 |
| H  | 4.144796435  | 12.569740070 | -1.942630205 |
| H  | 0.384139911  | 10.507339512 | -2.277220912 |
| H  | 3.256687181  | 13.872161440 | -0.042352272 |
| H  | -0.499412580 | 11.816638240 | -0.384294828 |
| H  | 0.931146059  | 13.504109592 | 0.741292180  |
| C  | 3.255780005  | 8.651722952  | -3.159512308 |
| C  | 3.047147750  | 8.231127497  | -1.839552057 |
| C  | 3.660681639  | 7.691302580  | -4.099382637 |
| C  | 3.234656000  | 6.902150352  | -1.471055123 |
| C  | 3.852248045  | 6.363417828  | -3.738113557 |
| C  | 3.637775218  | 5.967113833  | -2.419882995 |
| H  | 2.730848024  | 8.955158443  | -1.086664709 |
| H  | 3.833773308  | 7.985297596  | -5.137324009 |
| H  | 3.066533141  | 6.595872084  | -0.439547481 |
| H  | 4.168621598  | 5.635219011  | -4.484132988 |
| H  | 3.786307995  | 4.928284446  | -2.132848188 |
| C  | 1.824184720  | 10.488591755 | -5.148378368 |
| Si | 3.007024088  | 10.438833712 | -3.688957028 |
| H  | 2.193908545  | 9.884900690  | -5.985075423 |
| H  | 0.844813794  | 10.087632782 | -4.861403239 |
| H  | 1.678732744  | 11.512903097 | -5.507960205 |

=====  
**4C**  
=====

|    |              |              |              |
|----|--------------|--------------|--------------|
| C  | -1.648602067 | 5.916179465  | -0.607315871 |
| C  | -0.425445839 | 6.480550552  | -0.187031674 |
| C  | -1.618416348 | 4.792042346  | -1.459701890 |
| C  | 0.777464639  | 5.958127651  | -0.629460183 |
| C  | -0.411582066 | 4.283316462  | -1.910483633 |
| C  | 0.783411978  | 4.868599262  | -1.498984180 |
| H  | -0.413108514 | 7.309062842  | 0.516732053  |
| H  | -2.545894030 | 4.309457607  | -1.762322221 |
| H  | 1.714352237  | 6.393000835  | -0.293288993 |
| H  | -0.398478154 | 3.422753959  | -2.573198697 |
| H  | 1.729856699  | 4.462976788  | -1.847188874 |
| Si | -3.251780581 | 6.524491041  | -0.020332836 |
| C  | -4.732419129 | 5.486835250  | -0.290946247 |
| C  | -5.096199454 | 5.097857336  | -1.592618380 |
| C  | -5.524935492 | 5.069094941  | 0.792998081  |
| C  | -6.227557966 | 4.321257522  | -1.800982826 |
| C  | -6.643547938 | 4.276149694  | 0.577940795  |
| C  | -6.996103105 | 3.907755836  | -0.717023529 |
| H  | -4.507982381 | 5.418578496  | -2.452285485 |
| H  | -5.257791588 | 5.343110166  | 1.813466384  |
| H  | -6.510412332 | 4.036994084  | -2.810742372 |
| H  | -7.242441404 | 3.944911265  | 1.421772070  |
| H  | -7.876924456 | 3.293181764  | -0.882771298 |
| C  | -3.449155818 | 8.117849401  | 0.820617011  |
| C  | -4.666252750 | 8.391172612  | 1.480390810  |
| C  | -2.457361654 | 9.121101361  | 0.785911740  |
| C  | -4.862589945 | 9.603710062  | 2.120604675  |
| C  | -2.666432917 | 10.336633505 | 1.413998285  |
| C  | -3.862133897 | 10.572172373 | 2.090522356  |

|   |              |              |             |
|---|--------------|--------------|-------------|
| H | -5.465381207 | 7.652068197  | 1.482644169 |
| H | -1.533006533 | 8.964053405  | 0.235592493 |
| H | -5.799014843 | 9.801593352  | 2.634252825 |
| H | -1.902013400 | 11.107209342 | 1.373320064 |
| H | -4.021114116 | 11.526350920 | 2.586233086 |

=====  
**4CH**  
=====

|    |              |              |              |
|----|--------------|--------------|--------------|
| H  | 4.634065841  | 11.618441676 | -3.395548305 |
| C  | 2.218993987  | 11.777736964 | -2.169692944 |
| C  | 2.654181350  | 12.922622433 | -1.491853454 |
| C  | 0.932971668  | 11.293860237 | -1.888732476 |
| C  | 1.837175080  | 13.565274043 | -0.566825208 |
| C  | 0.111433117  | 11.930907649 | -0.967157947 |
| C  | 0.564421291  | 13.069667415 | -0.304917740 |
| H  | 3.651261203  | 13.318394116 | -1.689602273 |
| H  | 0.569319919  | 10.396579709 | -2.393766209 |
| H  | 2.194772040  | 14.453345640 | -0.048588458 |
| H  | -0.883521687 | 11.539700488 | -0.762229255 |
| H  | -0.076714032 | 13.569812162 | 0.417831567  |
| C  | 3.414970692  | 9.109919979  | -3.075579141 |
| C  | 3.244924317  | 8.625031565  | -1.771955511 |
| C  | 3.697310063  | 8.185132253  | -4.090222054 |
| C  | 3.355386707  | 7.267772058  | -1.489967467 |
| C  | 3.808797453  | 6.827183266  | -3.814425713 |
| C  | 3.637958582  | 6.367325819  | -2.512196878 |
| H  | 3.011616552  | 9.320744431  | -0.965140482 |
| H  | 3.820304878  | 8.532573501  | -5.116752055 |
| H  | 3.216557286  | 6.910919977  | -0.471186374 |
| H  | 4.025095775  | 6.124988660  | -4.617299731 |
| H  | 3.720963073  | 5.304554217  | -2.294522212 |
| Si | 3.305366222  | 10.945364103 | -3.450056233 |
| C  | 2.634514990  | 11.185973195 | -5.183503228 |
| C  | 3.189704644  | 12.149151276 | -6.034725163 |
| C  | 1.533631315  | 10.452408196 | -5.647791651 |
| C  | 2.665870509  | 12.376505417 | -7.303133330 |
| H  | 4.050095722  | 12.730498156 | -5.700530029 |
| C  | 1.003638329  | 10.675842727 | -6.912736320 |
| H  | 1.089667381  | 9.682395227  | -5.013975528 |
| C  | 1.570417929  | 11.640299462 | -7.742108495 |
| H  | 3.114008106  | 13.127651707 | -7.951043050 |
| H  | 0.148879845  | 10.095451717 | -7.255411688 |
| H  | 1.158427962  | 11.815354973 | -8.733682521 |

=====  
**5C**  
=====

|    |              |              |              |
|----|--------------|--------------|--------------|
| C  | -3.312073205 | -0.300161576 | -1.091388748 |
| H  | -3.160506183 | 0.649229544  | -0.571447702 |
| H  | -4.324198019 | -0.668792945 | -0.872379114 |
| H  | -2.625290462 | -1.052259962 | -0.679762122 |
| Si | -3.083964106 | -0.170878431 | -2.901809628 |
| C  | -3.214562112 | -1.666956893 | -3.946446819 |
| H  | -3.543306229 | -2.548643021 | -3.390253109 |
| H  | -3.895880258 | -1.488492493 | -4.788425522 |
| H  | -2.233816796 | -1.882238427 | -4.395385980 |
| C  | -2.725097208 | 1.450859340  | -3.668510961 |
| H  | -2.534348203 | 1.381205900  | -4.742603089 |
| H  | -3.573754596 | 2.130306377  | -3.504269799 |
| H  | -1.864806566 | 1.922366920  | -3.175267092 |

=====  
**5CH**  
=====

|   |              |              |              |
|---|--------------|--------------|--------------|
| C | -2.461195359 | -0.836356324 | -1.265559885 |
| H | -1.923133360 | -0.091008810 | -0.669483684 |
| H | -3.295797284 | -1.207938659 | -0.658611958 |
| H | -1.781050487 | -1.676185619 | -1.445262123 |

|    |              |              |              |
|----|--------------|--------------|--------------|
| Si | -3.099994222 | -0.103414793 | -2.876060889 |
| C  | -4.000058611 | -1.427527580 | -3.864015238 |
| H  | -4.850818165 | -1.817922091 | -3.292389838 |
| H  | -4.388637016 | -1.030090944 | -4.808170789 |
| H  | -3.343308872 | -2.271778987 | -4.100872526 |
| H  | -1.950526823 | 0.410793675  | -3.674286976 |
| C  | -4.279729520 | 1.312862634  | -2.500014822 |
| H  | -3.790146591 | 2.102609904  | -1.919575173 |
| H  | -4.671626980 | 1.765392854  | -3.417579929 |
| H  | -5.134810068 | 0.951788928  | -1.915655251 |

=====  
**6C**  
=====

|    |               |               |               |
|----|---------------|---------------|---------------|
| Si | -2.5804602170 | -0.1775466680 | -5.6543672730 |
| H  | -1.1228450140 | -0.2975065800 | -5.4975117460 |
| C  | -3.3410517410 | 1.2832272060  | -4.9396512490 |
| C  | -4.6633841380 | 1.6870138480  | -5.2282784840 |
| C  | -2.5557690110 | 2.0638721320  | -4.0622065570 |
| C  | -5.1827831390 | 2.8272776400  | -4.6442800740 |
| C  | -3.0882651390 | 3.1986607550  | -3.4745087500 |
| C  | -4.3979256710 | 3.5758802770  | -3.7654139980 |
| H  | -5.2717324740 | 1.1214123080  | -5.9311481600 |
| H  | -1.5289496270 | 1.7763760210  | -3.8392007140 |
| H  | -6.1963617900 | 3.1435065380  | -4.8729822140 |
| H  | -2.4860480860 | 3.7947208990  | -2.7951953150 |
| H  | -4.8118792190 | 4.4711926180  | -3.3085715120 |
| C  | -3.3967483690 | -1.5057069580 | -6.5443249550 |
| C  | -2.5796520260 | -2.4111797070 | -7.2572753850 |
| C  | -4.7975154340 | -1.6849114190 | -6.5527302950 |
| C  | -3.1514606130 | -3.4473438390 | -7.9758563280 |
| C  | -5.3584227440 | -2.7290227140 | -7.2641924080 |
| C  | -4.5363299050 | -3.6026813300 | -7.9782621430 |
| H  | -1.4962246750 | -2.2978111270 | -7.2501943560 |
| H  | -5.4416644870 | -1.0215117410 | -5.9791306000 |
| H  | -2.5231234480 | -4.1386401870 | -8.5296665840 |
| H  | -6.4349547840 | -2.8728608740 | -7.2634619840 |
| H  | -4.9829423910 | -4.4209534190 | -8.5373428360 |

=====  
**6CH**  
=====

|    |               |               |                |
|----|---------------|---------------|----------------|
| Si | -2.8707374027 | -0.4489299645 | -6.0672252370  |
| H  | -1.7433340685 | -1.2463430173 | -5.5123137465  |
| C  | -2.6286337544 | 1.3205236417  | -5.5017205456  |
| C  | -3.2909432224 | 2.3798117455  | -6.1366208721  |
| C  | -1.7860949066 | 1.6212488277  | -4.4250935353  |
| C  | -3.1245512079 | 3.6909517258  | -5.7065813256  |
| C  | -1.6151479756 | 2.9311059318  | -3.9898731561  |
| C  | -2.2874883074 | 3.9667828409  | -4.6296047625  |
| H  | -3.9395934102 | 2.1754678640  | -6.9889199272  |
| H  | -1.2491315616 | 0.8172711194  | -3.9212607754  |
| H  | -3.6476294267 | 4.5004639026  | -6.2111973898  |
| H  | -0.9568512972 | 3.1449123460  | -3.1507081617  |
| H  | -2.1555644682 | 4.9923864914  | -4.2913357564  |
| C  | -2.9398806860 | -0.5171491552 | -7.9377778493  |
| C  | -2.0433716118 | 0.2246394344  | -8.7189821254  |
| C  | -3.8802451550 | -1.3182639543 | -8.5960471144  |
| C  | -2.0810555483 | 0.1648015434  | -10.1066570789 |
| C  | -3.9232708975 | -1.3821908527 | -9.9851595575  |
| C  | -3.0230388465 | -0.6397133498 | -10.7408808247 |
| H  | -1.3139988759 | 0.8731105032  | -8.2325330002  |
| H  | -4.5974518500 | -1.8955082848 | -8.0124365232  |
| H  | -1.3813433109 | 0.7527646852  | -10.6967663350 |
| H  | -4.6662103519 | -2.0046127408 | -10.4791940893 |
| H  | -3.0569608656 | -0.6839295511 | -11.8273546933 |
| H  | -4.1413786441 | -1.0357242630 | -5.5606503060  |

=====  
**7C**  
=====

|    |               |               |               |
|----|---------------|---------------|---------------|
| Si | -2.5479887380 | -0.3145614650 | -5.4096191170 |
| H  | -1.3127180930 | -0.6473519970 | -4.6875686640 |
| C  | -3.2646287440 | -1.5968649030 | -6.4861492180 |
| H  | -2.5714183780 | -1.7864080870 | -7.3204887960 |
| H  | -3.3410915930 | -2.5499712740 | -5.9458148760 |
| H  | -4.2397341040 | -1.3198602760 | -6.8945583100 |
| C  | -3.2388151800 | 1.3534471220  | -5.1696517340 |
| H  | -4.1004186230 | 1.5578958060  | -5.8101005410 |
| H  | -3.5396917320 | 1.4724115180  | -4.1175919640 |
| H  | -2.4599786550 | 2.1098522290  | -5.3387306370 |

=====  
**7CH**  
=====

|    |               |               |               |
|----|---------------|---------------|---------------|
| Si | -2.6300585891 | -0.3122951222 | -5.4553793504 |
| H  | -1.6494986211 | -0.6240167101 | -4.3798962448 |
| C  | -2.3954710358 | -1.4996783767 | -6.8917459958 |
| H  | -1.3988366805 | -1.3865917317 | -7.3329667226 |
| H  | -2.5051243867 | -2.5433897333 | -6.5798308300 |
| H  | -3.1305925682 | -1.3082173892 | -7.6813123970 |
| C  | -2.3981352896 | 1.4608420390  | -6.0299120896 |
| H  | -3.1072653435 | 1.7084858983  | -6.8277582671 |
| H  | -2.5502779161 | 2.1762849359  | -5.2152502954 |
| H  | -1.3880130290 | 1.6150121266  | -6.4253143307 |
| H  | -3.9932858784 | -0.4808686114 | -4.8822027382 |

=====  
**1CAn1 6A'**  
=====

|    |              |              |              |
|----|--------------|--------------|--------------|
| Br | 0.447798073  | 9.890656471  | 2.635499716  |
| Si | 1.492115736  | 7.948027134  | 1.605344415  |
| C  | 1.252429605  | 6.636739731  | 2.870908260  |
| H  | 1.540396452  | 5.773849010  | 2.501823425  |
| H  | 0.303722441  | 6.587691307  | 3.111119986  |
| H  | 1.784031153  | 6.847773552  | 3.663565397  |
| Br | -1.753007174 | 11.000905037 | -0.333748877 |
| Br | -1.792595506 | 14.877610207 | -0.315483272 |
| Br | 0.443890989  | 16.011547089 | 2.667049408  |
| Br | 1.833397985  | 12.874362946 | 4.359876156  |
| Br | -1.778671145 | 12.869117737 | 2.993659019  |
| B  | 2.465290546  | 12.083365440 | 1.282183528  |
| H  | 3.240713596  | 11.589176178 | 1.610453606  |
| B  | 1.458559275  | 11.534980774 | -0.076880664 |
| H  | 1.611377358  | 10.680480003 | -0.536714375 |
| B  | 0.800659001  | 12.964942932 | -0.871371150 |
| B  | 1.403711677  | 14.412940025 | -0.015569500 |
| H  | 1.554517031  | 15.253087997 | -0.492008328 |
| B  | 2.441200972  | 13.887371063 | 1.314116359  |
| H  | 3.226031542  | 14.394173622 | 1.636000037  |
| B  | 0.808675587  | 11.566850662 | 1.595125914  |
| B  | -0.239158675 | 12.082560539 | 0.251389533  |
| B  | -0.243348554 | 13.824429512 | 0.296095580  |
| B  | 0.724242508  | 14.448039055 | 1.657714367  |
| B  | 1.419417620  | 12.963745117 | 2.479028463  |
| B  | -0.234340504 | 12.918137550 | 1.827597380  |
| C  | 2.370114088  | 12.984553337 | -0.179065943 |
| H  | 3.158750296  | 13.025039673 | -0.761521995 |
| C  | 0.698419094  | 7.510064125  | -0.109833159 |
| H  | -0.234394804 | 7.009648323  | 0.046186913  |
| H  | 0.532292843  | 8.408994675  | -0.665913880 |
| H  | 1.359598994  | 6.869992256  | -0.655772090 |
| H  | 0.600741684  | 12.971549988 | -2.034293890 |
| C  | 3.284849882  | 8.209227562  | 1.184062004  |
| C  | 3.693661928  | 8.402678490  | -0.146269038 |
| C  | 4.268796444  | 8.218700409  | 2.187102556  |
| C  | 5.037028790  | 8.598443031  | -0.462284386 |

|   |             |             |              |
|---|-------------|-------------|--------------|
| C | 5.612318039 | 8.414415359 | 1.871714234  |
| C | 6.002873898 | 8.605242729 | 0.545341671  |
| H | 2.950617552 | 8.399208069 | -0.937683940 |
| H | 3.975895643 | 8.071234703 | 3.221958637  |
| H | 5.329600334 | 8.745959282 | -1.497971535 |
| H | 6.355456352 | 8.417800903 | 2.664015293  |
| H | 7.049599648 | 8.757749557 | 0.299367011  |

=====

**1Ctol**

=====

|    |              |              |              |
|----|--------------|--------------|--------------|
| Si | 13.585218430 | 8.447195053  | 8.337317467  |
| C  | 13.995873451 | 6.681952000  | 7.919129848  |
| H  | 13.598903656 | 6.029396534  | 8.682664871  |
| H  | 15.068192482 | 6.564415455  | 7.867002964  |
| H  | 13.558970451 | 6.427065849  | 6.964902878  |
| C  | 12.630499840 | 10.793341637 | 5.407455921  |
| C  | 12.933759689 | 11.376744270 | 6.649231434  |
| C  | 13.272357941 | 9.590800285  | 5.066510201  |
| C  | 13.845367432 | 10.779767990 | 7.518377304  |
| C  | 14.184057236 | 8.993344307  | 5.935231209  |
| C  | 14.474934578 | 9.585068703  | 7.165461063  |
| H  | 12.449050903 | 12.301161766 | 6.926559448  |
| H  | 13.050405502 | 9.129311562  | 4.115634441  |
| H  | 14.063879013 | 11.245256424 | 8.468099594  |
| H  | 14.666080475 | 8.068941116  | 5.653217316  |
| H  | 15.248146057 | 9.174890518  | 7.798152447  |
| C  | 11.918025017 | 11.620679855 | 4.321412086  |
| H  | 11.886797905 | 11.056090355 | 3.401268721  |
| H  | 10.910861969 | 11.843494415 | 4.641375065  |
| H  | 12.456745148 | 12.542695045 | 4.159955502  |
| C  | 14.119755745 | 8.811719894  | 10.081161499 |
| H  | 14.222749710 | 9.889700890  | 10.249853134 |
| H  | 13.393641472 | 8.431670189  | 10.808778763 |
| H  | 15.086895943 | 8.348389626  | 10.307156563 |
| C  | 11.750317574 | 8.710037231  | 8.183519363  |
| C  | 11.142755508 | 9.874112129  | 8.683648109  |
| C  | 10.932362556 | 7.750162125  | 7.563906670  |
| C  | 9.767740250  | 10.071367264 | 8.568545341  |
| C  | 9.557291031  | 7.946846485  | 7.448502541  |
| C  | 8.968363762  | 9.108541489  | 7.950341225  |
| H  | 11.755246162 | 10.629350662 | 9.166281700  |
| H  | 11.380183220 | 6.843038559  | 7.170146465  |
| H  | 9.320116997  | 10.979255676 | 8.962727547  |
| H  | 8.944844246  | 7.190809727  | 6.965466976  |
| H  | 7.897017956  | 9.262007713  | 7.860542774  |

=====

**2CAn1**

=====

|    |              |              |              |
|----|--------------|--------------|--------------|
| Br | 0.447798073  | 9.890656471  | 2.635499716  |
| Si | 1.492115736  | 7.948027134  | 1.605344415  |
| C  | 0.338636935  | 7.544765949  | 0.232229784  |
| H  | 0.731317997  | 6.837091923  | -0.323402643 |
| H  | 0.193260923  | 8.344858170  | -0.314461410 |
| H  | -0.512525201 | 7.237038612  | 0.601374090  |
| Br | -1.753007174 | 11.000905037 | -0.333748877 |
| Br | -1.792595506 | 14.877610207 | -0.315483272 |
| Br | 0.443890989  | 16.011547089 | 2.667049408  |
| Br | 1.833397985  | 12.874362946 | 4.359876156  |
| Br | -1.778671145 | 12.869117737 | 2.993659019  |
| B  | 2.465290546  | 12.083365440 | 1.282183528  |
| H  | 3.240713596  | 11.589176178 | 1.610453606  |
| B  | 1.458559275  | 11.534980774 | -0.076880664 |
| H  | 1.611377358  | 10.680480003 | -0.536714375 |
| B  | 0.800659001  | 12.964942932 | -0.871371150 |
| B  | 1.403711677  | 14.412940025 | -0.015569500 |
| H  | 1.554517031  | 15.253087997 | -0.492008328 |
| B  | 2.441200972  | 13.887371063 | 1.314116359  |
| H  | 3.226031542  | 14.394173622 | 1.636000037  |

|   |              |              |              |
|---|--------------|--------------|--------------|
| B | 0.808675587  | 11.566850662 | 1.595125914  |
| B | -0.239158675 | 12.082560539 | 0.251389533  |
| B | -0.243348554 | 13.824429512 | 0.296095580  |
| B | 0.724242508  | 14.448039055 | 1.657714367  |
| B | 1.419417620  | 12.963745117 | 2.479028463  |
| B | -0.234340504 | 12.918137550 | 1.827597380  |
| C | 2.370114088  | 12.984553337 | -0.179065943 |
| H | 3.158750296  | 13.025039673 | -0.761521995 |
| H | 0.600741684  | 12.971549988 | -2.034293890 |
| C | 1.723978043  | 6.524145603  | 2.779397964  |
| C | 2.311146021  | 6.716503143  | 4.041366100  |
| C | 1.316941977  | 5.225587368  | 2.429541111  |
| C | 2.485033274  | 5.649671078  | 4.921398163  |
| C | 1.490561962  | 4.158354759  | 3.309140205  |
| C | 2.075512409  | 4.365351200  | 4.559419632  |
| H | 2.633223295  | 7.711354733  | 4.332915306  |
| H | 0.860881031  | 5.053536892  | 1.459555864  |
| H | 2.941444635  | 5.822363853  | 5.891899586  |
| H | 1.168103456  | 3.163048267  | 3.016920567  |
| H | 2.210890055  | 3.533988237  | 5.244915485  |
| H | 2.872819662  | 8.224914551  | 1.149943471  |

=====  
**2Ctol**  
=====

|    |              |              |             |
|----|--------------|--------------|-------------|
| Si | 13.585218430 | 8.447195053  | 8.337317467 |
| C  | 11.751458168 | 8.575294495  | 8.053568840 |
| C  | 11.106348991 | 7.637079239  | 7.271194458 |
| H  | 11.623205185 | 6.726835728  | 7.005268574 |
| C  | 9.809763908  | 7.853351116  | 6.827855587 |
| H  | 9.325370789  | 7.116695881  | 6.204075336 |
| C  | 9.137959480  | 9.007821083  | 7.182552338 |
| H  | 8.121639252  | 9.164461136  | 6.852465153 |
| C  | 9.767314911  | 9.962518692  | 7.958842754 |
| H  | 9.204303741  | 10.796521187 | 8.351089478 |
| C  | 11.077601433 | 9.752075195  | 8.373099327 |
| H  | 11.588804245 | 10.507070541 | 8.951935768 |
| C  | 14.137685776 | 6.696107864  | 8.040544510 |
| H  | 13.734094620 | 6.055814266  | 8.810958862 |
| H  | 15.216480255 | 6.650261402  | 8.062944412 |
| H  | 13.783272743 | 6.365489483  | 7.075410843 |
| C  | 12.630499840 | 10.793341637 | 5.407455921 |
| C  | 12.933759689 | 11.376744270 | 6.649231434 |
| C  | 13.272357941 | 9.590800285  | 5.066510201 |
| C  | 13.845367432 | 10.779767990 | 7.518377304 |
| C  | 14.184057236 | 8.993344307  | 5.935231209 |
| C  | 14.474934578 | 9.585068703  | 7.165461063 |
| H  | 12.449050903 | 12.301161766 | 6.926559448 |
| H  | 13.050405502 | 9.129311562  | 4.115634441 |
| H  | 14.063879013 | 11.245256424 | 8.468099594 |
| H  | 14.666080475 | 8.068941116  | 5.653217316 |
| H  | 15.248146057 | 9.174890518  | 7.798152447 |
| C  | 11.918025017 | 11.620679855 | 4.321412086 |
| H  | 11.886797905 | 11.056090355 | 3.401268721 |
| H  | 10.910861969 | 11.843494415 | 4.641375065 |
| H  | 12.456745148 | 12.542695045 | 4.159955502 |
| H  | 13.896799088 | 8.833204269  | 9.731704712 |

=====  
**3CAn2**      **6B'**      **13A'**  
=====

|    |              |              |              |
|----|--------------|--------------|--------------|
| Br | 13.660349846 | 10.061539650 | 6.182040215  |
| Br | 12.807689667 | 9.869939804  | 9.924830437  |
| Br | 15.897919655 | 11.017939568 | 11.841770172 |
| Br | 18.570749283 | 12.138290405 | 9.286049843  |
| Br | 17.067630768 | 11.504659653 | 5.743529797  |
| Br | 16.292470932 | 9.038100243  | 8.545559883  |
| Si | 11.440429688 | 10.724140167 | 5.390799999  |

B 13.349249840 12.629870415 8.309880257  
H 12.414449692 12.763680458 8.026579857  
B 14.053600311 12.868080139 9.928959846  
H 13.529520035 13.234230042 10.682439804  
B 15.702039719 13.507740021 9.736169815  
H 16.094179153 14.278260231 10.525059700  
B 16.023559570 13.648900032 7.993140221  
H 16.781799316 14.528240204 7.593780041  
B 14.585120201 13.100419998 7.098020077  
H 14.310070038 13.587140083 6.216670036  
B 14.336079597 11.410849571 7.509180069  
B 13.990409851 11.246150017 9.232540131  
B 15.436289787 11.800519943 10.100119591  
B 16.674009323 12.290189743 8.911870003  
B 15.991959572 12.031390190 7.288849831  
B 15.607259750 10.871179581 8.602999687  
C 14.468029976 13.869469643 8.614809990  
C 11.291939735 9.444829941 4.078209877  
C 10.949990273 9.813920021 2.791599989  
H 10.870070457 10.734430313 2.573230028  
C 10.719539642 8.855170250 1.815819979  
H 10.474220276 9.122799873 0.938399971  
C 10.849630356 7.512629986 2.116810083  
H 10.708390236 6.859739780 1.442029953  
C 11.184149742 7.121490002 3.399490118  
H 11.278929710 6.199500084 3.609999895  
C 11.383009911 8.087590218 4.379209995  
H 11.581859589 7.817019939 5.268430233  
C 10.379440308 10.462389946 6.854070187  
H 9.455789566 10.703550339 6.633739948  
H 10.697239876 11.022640228 7.591810226  
H 10.416609764 9.519820213 7.119659901  
C 11.063149452 12.432270050 4.758698940  
C 11.951406479 13.095785141 3.895518780  
C 9.881788254 13.095785141 5.130805016  
C 11.668956757 14.375828743 3.421667099  
C 9.598782539 14.375828743 4.657285213  
C 10.491142273 15.022023201 3.800348997  
H 12.870331764 12.602256775 3.594737530  
H 9.180875778 12.602256775 5.796851158  
H 12.370655060 14.869244576 2.755208015  
H 8.679120064 14.869244576 4.958562374  
H 10.270859718 16.019350052 3.431283236  
H 14.084432602 14.879042625 8.618786812

=====  
**3Ctol**  
=====

Si 13.585218430 8.447195053 8.337317467  
C 13.786001205 6.688479900 7.766170502  
C 12.677451134 5.875174999 7.631362915  
H 11.692646980 6.317993641 7.653095245  
C 12.818278313 4.504614830 7.469533920  
H 11.940876007 3.881122828 7.381087780  
C 14.077273369 3.936696529 7.421246052  
H 14.184344292 2.871979713 7.275252342  
C 15.199401855 4.731342316 7.560986042  
H 16.180786133 4.315372944 7.387045860  
C 15.048682213 6.099852085 7.753885746  
H 15.918334007 6.723996162 7.897237301  
C 14.302145004 8.630571365 10.043772697  
H 13.696044922 8.082237244 10.749728203  
H 14.317384720 9.675189972 10.317526817  
H 15.309283257 8.240766525 10.054908752  
C 11.777757645 8.884630203 8.373854637  
C 11.037784576 8.914140701 7.179744244  
C 11.072870255 8.858099937 9.589076042  
C 9.644079208 8.917023659 7.199782848  
C 9.679174423 8.860968590 9.609762192



|   |              |              |              |
|---|--------------|--------------|--------------|
| C | 8.958055496  | 8.890447617  | 8.415051460  |
| H | 11.564330101 | 8.934770584  | 6.237022400  |
| H | 11.626642227 | 8.835242271  | 10.516014099 |
| H | 9.094950676  | 8.939934731  | 6.270087719  |
| H | 9.157350540  | 8.840266228  | 10.555104256 |
| H | 7.878260612  | 8.892556190  | 8.435976982  |
| C | 12.630499840 | 10.793341637 | 5.407455921  |
| C | 12.933759689 | 11.376744270 | 6.649231434  |
| C | 13.272357941 | 9.590800285  | 5.066510201  |
| C | 13.845367432 | 10.779767990 | 7.518377304  |
| C | 14.184057236 | 8.993344307  | 5.935231209  |
| C | 14.474934578 | 9.585068703  | 7.165461063  |
| H | 12.449050903 | 12.301161766 | 6.926559448  |
| H | 13.050405502 | 9.129311562  | 4.115634441  |
| H | 14.063879013 | 11.245256424 | 8.468099594  |
| H | 14.666080475 | 8.068941116  | 5.653217316  |
| H | 15.248146057 | 9.174890518  | 7.798152447  |
| C | 11.918025017 | 11.620679855 | 4.321412086  |
| H | 11.886797905 | 11.056090355 | 3.401268721  |
| H | 10.910861969 | 11.843494415 | 4.641375065  |
| H | 12.456745148 | 12.542695045 | 4.159955502  |

=====  
**4CAn1 13B' 20B'**  
=====

|    |              |              |              |
|----|--------------|--------------|--------------|
| Br | 0.447798073  | 9.890656471  | 2.635499716  |
| Si | 1.492115736  | 7.948027134  | 1.605344415  |
| Br | -1.753007174 | 11.000905037 | -0.333748877 |
| Br | -1.792595506 | 14.877610207 | -0.315483272 |
| Br | 0.443890989  | 16.011547089 | 2.667049408  |
| Br | 1.833397985  | 12.874362946 | 4.359876156  |
| Br | -1.778671145 | 12.869117737 | 2.993659019  |
| B  | 2.465290546  | 12.083365440 | 1.282183528  |
| H  | 3.240713596  | 11.589176178 | 1.610453606  |
| B  | 1.458559275  | 11.534980774 | -0.076880664 |
| H  | 1.611377358  | 10.680480003 | -0.536714375 |
| B  | 0.800659001  | 12.964942932 | -0.871371150 |
| B  | 1.403711677  | 14.412940025 | -0.015569500 |
| H  | 1.554517031  | 15.253087997 | -0.492008328 |
| B  | 2.441200972  | 13.887371063 | 1.314116359  |
| H  | 3.226031542  | 14.394173622 | 1.636000037  |
| B  | 0.808675587  | 11.566850662 | 1.595125914  |
| B  | -0.239158675 | 12.082560539 | 0.251389533  |
| B  | -0.243348554 | 13.824429512 | 0.296095580  |
| B  | 0.724242508  | 14.448039055 | 1.657714367  |
| B  | 1.419417620  | 12.963745117 | 2.479028463  |
| B  | -0.234340504 | 12.918137550 | 1.827597380  |
| C  | 2.370114088  | 12.984553337 | -0.179065943 |
| H  | 3.158750296  | 13.025039673 | -0.761521995 |
| H  | 0.600741684  | 12.971549988 | -2.034293890 |
| C  | 3.269150734  | 8.228005409  | 1.132736325  |
| C  | 4.272579193  | 8.313184738  | 2.112638235  |
| C  | 3.646285057  | 8.360339165  | -0.214330420 |
| C  | 5.604342937  | 8.522989273  | 1.758786559  |
| C  | 4.977880478  | 8.570156097  | -0.568807483 |
| C  | 5.963373184  | 8.652490616  | 0.416199505  |
| H  | 4.004234314  | 8.213837624  | 3.159818172  |
| H  | 2.887756109  | 8.297898293  | -0.988410175 |
| H  | 6.362985611  | 8.585394859  | 2.533753633  |
| H  | 5.245878220  | 8.669502258  | -1.616812587 |
| H  | 7.000932693  | 8.815961838  | 0.140257299  |
| C  | 0.701740146  | 7.494690418  | -0.016195737 |
| C  | 0.911215901  | 8.275605202  | -1.165379524 |
| C  | -0.121771201 | 6.361582756  | -0.126771763 |
| C  | 0.319060773  | 7.936140060  | -2.380673409 |
| C  | -0.714203954 | 6.021603107  | -1.341786623 |
| C  | -0.496574730 | 6.807372093  | -2.474667072 |
| H  | 1.543824673  | 9.155615807  | -1.103315830 |
| H  | -0.297655344 | 5.743535995  | 0.748184025  |

|   |              |             |              |
|---|--------------|-------------|--------------|
| H | 0.495376825  | 8.554920197 | -3.255905151 |
| H | -1.347140908 | 5.140917778 | -1.403361797 |
| H | -0.958052218 | 6.542681694 | -3.421437502 |
| C | 1.303492665  | 6.637603760 | 2.911794424  |
| C | 0.491455853  | 6.852029324 | 4.038270950  |
| C | 1.968989849  | 5.405121803 | 2.800287008  |
| C | 0.349906385  | 5.870214462 | 5.017468452  |
| C | 1.827837467  | 4.422918797 | 3.779151917  |
| C | 1.017514825  | 4.650826931 | 4.892547131  |
| H | -0.032259796 | 7.796876907 | 4.145268917  |
| H | 2.601702929  | 5.217512131 | 1.938346624  |
| H | -0.283337861 | 6.058442593 | 5.879778862  |
| H | 2.352109194  | 3.477624178 | 3.671612501  |
| H | 0.907383263  | 3.885708332 | 5.655345440  |

=====  
**4Ctol**  
=====

|    |              |              |              |
|----|--------------|--------------|--------------|
| Si | 13.251944542 | 8.510235786  | 8.064699173  |
| C  | 12.630499840 | 10.793341637 | 5.407455921  |
| C  | 12.933759689 | 11.376744270 | 6.649231434  |
| C  | 13.272357941 | 9.590800285  | 5.066510201  |
| C  | 13.845367432 | 10.779767990 | 7.518377304  |
| C  | 14.184057236 | 8.993344307  | 5.935231209  |
| C  | 14.474934578 | 9.585068703  | 7.165461063  |
| H  | 12.449050903 | 12.301161766 | 6.926559448  |
| H  | 13.050405502 | 9.129311562  | 4.115634441  |
| H  | 14.063879013 | 11.245256424 | 8.468099594  |
| H  | 14.666080475 | 8.068941116  | 5.653217316  |
| H  | 15.248146057 | 9.174890518  | 7.798152447  |
| C  | 11.918025017 | 11.620679855 | 4.321412086  |
| H  | 11.886797905 | 11.056090355 | 3.401268721  |
| H  | 10.910861969 | 11.843494415 | 4.641375065  |
| H  | 12.456745148 | 12.542695045 | 4.159955502  |
| C  | 13.297221184 | 6.791706562  | 7.354623318  |
| C  | 14.493937492 | 6.245114326  | 6.861229420  |
| C  | 12.135680199 | 6.003189564  | 7.296365261  |
| C  | 14.528184891 | 4.957310677  | 6.329051971  |
| C  | 12.169292450 | 4.715321064  | 6.764304638  |
| C  | 13.365867615 | 4.186187267  | 6.278052807  |
| H  | 15.403730392 | 6.836320877  | 6.896105766  |
| H  | 11.199723244 | 6.405048370  | 7.671811581  |
| H  | 15.465005875 | 4.555654049  | 5.953491688  |
| H  | 11.258629799 | 4.124137878  | 6.729634762  |
| H  | 13.392303467 | 3.182787895  | 5.863459587  |
| C  | 13.692700386 | 8.446692467  | 9.870605469  |
| C  | 13.627490044 | 9.599544525  | 10.671236038 |
| C  | 14.100330353 | 7.244472980  | 10.472966194 |
| C  | 13.957721710 | 9.552242279  | 12.024578094 |
| C  | 14.430688858 | 7.196537971  | 11.826254845 |
| C  | 14.360945702 | 8.350351334  | 12.608599663 |
| H  | 13.315102577 | 10.539531708 | 10.227048874 |
| H  | 14.158023834 | 6.341205120  | 9.873597145  |
| H  | 13.899826050 | 10.456380844 | 12.623901367 |
| H  | 14.743221283 | 6.255688667  | 12.270251274 |
| H  | 14.618290901 | 8.313250542  | 13.663016319 |
| C  | 11.542920113 | 9.217475891  | 7.868106842  |
| C  | 10.679830551 | 8.752233505  | 6.861649036  |
| C  | 11.078285217 | 10.232166290 | 8.721833229  |
| C  | 9.399063110  | 9.282028198  | 6.714076042  |
| C  | 9.797625542  | 10.762358665 | 8.574760437  |
| C  | 8.951811790  | 10.289746284 | 7.570046425  |
| H  | 11.017685890 | 7.968739033  | 6.190490723  |
| H  | 11.728001595 | 10.606976509 | 9.506594658  |
| H  | 8.749312401  | 8.906626701  | 5.928643703  |
| H  | 9.460027695  | 11.546351433 | 9.246616364  |
| H  | 7.953961849  | 10.702683449 | 7.455261707  |

  
=====

**5CAn1 12A' 19B'**

```
=====
Br 0.447798073 9.890656471 2.635499716
Si 1.492115736 7.948027134 1.605344415
C 0.338636935 7.544765949 0.232229784
H 0.731317997 6.837091923 -0.323402643
H 0.193260923 8.344858170 -0.314461410
H -0.512525201 7.237038612 0.601374090
C 1.436171651 6.862796307 3.055098057
H 1.306696415 7.453362942 3.937915802
Br -1.753007174 11.000905037 -0.333748877
Br -1.792595506 14.877610207 -0.315483272
Br 0.443890989 16.011547089 2.667049408
Br 1.833397985 12.874362946 4.359876156
Br -1.778671145 12.869117737 2.993659019
B 2.465290546 12.083365440 1.282183528
H 3.240713596 11.589176178 1.610453606
B 1.458559275 11.534980774 -0.076880664
H 1.611377358 10.680480003 -0.536714375
B 0.800659001 12.964942932 -0.871371150
B 1.403711677 14.412940025 -0.015569500
H 1.554517031 15.253087997 -0.492008328
B 2.441200972 13.887371063 1.314116359
H 3.226031542 14.394173622 1.636000037
B 0.808675587 11.566850662 1.595125914
B -0.239158675 12.082560539 0.251389533
B -0.243348554 13.824429512 0.296095580
B 0.724242508 14.448039055 1.657714367
B 1.419417620 12.963745117 2.479028463
B -0.234340504 12.918137550 1.827597380
C 2.370114088 12.984553337 -0.179065943
H 3.158750296 13.025039673 -0.761521995
C 3.298810005 8.317811966 1.003085852
H 3.263489246 8.868680954 0.086463772
H 3.811499119 8.893121719 1.745425940
H 3.817916632 7.395586967 0.845194638
H 0.600741684 12.971549988 -2.034293890
H 0.617202401 6.180944920 2.958825350
H 2.351577282 6.313175201 3.124735117
=====
```

**5Ctol**

```
=====
Si 13.403890610 8.347096443 8.438190460
C 14.303126335 6.735026360 8.209065437
H 13.704222679 5.936411858 8.665029526
H 15.283724785 6.724080563 8.695558548
H 14.428503990 6.479257107 7.150798321
C 12.799219131 10.823840141 5.320407867
C 13.025666237 11.456334114 6.558573723
C 13.482626915 9.632782936 5.023150921
C 13.900789261 10.917656898 7.473487377
C 14.365496635 9.083914757 5.929168224
C 14.538528442 9.667096138 7.216969013
H 12.518650055 12.394841194 6.773072243
H 13.330727577 9.161337852 4.055030823
H 14.090991020 11.426779747 8.416316986
H 14.913366318 8.177858353 5.677587509
H 15.464352608 9.443844795 7.759763241
C 11.868755341 11.445382118 4.336516857
H 11.677954674 10.770236015 3.465192080
H 10.887453079 11.710326195 4.835471630
H 12.317235947 12.415586472 3.961038589
C 11.735942841 8.374575615 7.614628315
H 11.807680130 8.272651672 6.525555611
H 11.147205353 7.523461342 7.978077412
H 11.174618721 9.285517693 7.846964836
C 13.414294243 8.996092796 10.176874161
H 13.072614670 10.034241676 10.242539406
=====
```

H 12.716441154 8.389973640 10.768288612  
H 14.399612427 8.913768768 10.646001816

=====  
**6CAn1**  
=====

Br 0.447798073 9.890656471 2.635499716  
Si 1.492115736 7.948027134 1.605344415  
Br -1.753007174 11.000905037 -0.333748877  
Br -1.792595506 14.877610207 -0.315483272  
Br 0.443890989 16.011547089 2.667049408  
Br 1.833397985 12.874362946 4.359876156  
Br -1.778671145 12.869117737 2.993659019  
B 2.465290546 12.083365440 1.282183528  
H 3.240713596 11.589176178 1.610453606  
B 1.458559275 11.534980774 -0.076880664  
H 1.611377358 10.680480003 -0.536714375  
B 0.800659001 12.964942932 -0.871371150  
B 1.403711677 14.412940025 -0.015569500  
H 1.554517031 15.253087997 -0.492008328  
B 2.441200972 13.887371063 1.314116359  
H 3.226031542 14.394173622 1.636000037  
B 0.808675587 11.566850662 1.595125914  
B -0.239158675 12.082560539 0.251389533  
B -0.243348554 13.824429512 0.296095580  
B 0.724242508 14.448039055 1.657714367  
B 1.419417620 12.963745117 2.479028463  
B -0.234340504 12.918137550 1.827597380  
C 2.370114088 12.984553337 -0.179065943  
H 3.158750296 13.025039673 -0.761521995  
H 0.600741684 12.971549988 -2.034293890  
C 2.765805006 8.386877060 0.322875679  
C 2.599582434 8.007667542 -1.019845843  
C 3.921545029 9.107027054 0.669258833  
C 3.553885698 8.336386681 -1.981132865  
C 4.876203537 9.436041832 -0.291574299  
C 4.696887970 9.052233696 -1.621518135  
H 1.714243531 7.450650215 -1.310313344  
H 4.070872784 9.410450935 1.700810909  
H 3.403988123 8.032528877 -3.013222218  
H 5.761945724 9.993433952 -0.000401095  
H 5.440558434 9.308465004 -2.370314598  
C 0.278599620 6.917146683 0.643957973  
C -0.226367921 7.359217167 -0.590510726  
C -0.159202501 5.674194336 1.131534219  
C -1.135765195 6.586919308 -1.311188698  
C -1.068581700 4.901443958 0.411319047  
C -1.561252832 5.354194164 -0.813632250  
H 0.097967558 8.316480637 -0.986638963  
H 0.217701659 5.312633038 2.083207130  
H -1.512614489 6.949167728 -2.263432026  
H -1.392812848 3.943627834 0.808143973  
H -2.269789934 4.752292633 -1.374958038  
H 2.078914404 7.238317490 2.763955593

=====  
**6Ctol**  
=====

Si 13.585218430 8.447195053 8.337317467  
C 12.630499840 10.793341637 5.407455921  
C 12.933759689 11.376744270 6.649231434  
C 13.272357941 9.590800285 5.066510201  
C 13.845367432 10.779767990 7.518377304  
C 14.184057236 8.993344307 5.935231209  
C 14.474934578 9.585068703 7.165461063  
H 12.449050903 12.301161766 6.926559448  
H 13.050405502 9.129311562 4.115634441  
H 14.063879013 11.245256424 8.468099594  
H 14.666080475 8.068941116 5.653217316

|   |              |              |              |
|---|--------------|--------------|--------------|
| H | 15.248146057 | 9.174890518  | 7.798152447  |
| C | 11.918025017 | 11.620679855 | 4.321412086  |
| H | 11.886797905 | 11.056090355 | 3.401268721  |
| H | 10.910861969 | 11.843494415 | 4.641375065  |
| H | 12.456745148 | 12.542695045 | 4.159955502  |
| C | 14.280906677 | 8.653497696  | 10.049935341 |
| C | 14.064527512 | 9.834216118  | 10.780286789 |
| C | 15.037759781 | 7.633052826  | 10.650099754 |
| C | 14.585733414 | 9.989111900  | 12.063710213 |
| C | 15.559227943 | 7.787356377  | 11.933487892 |
| C | 15.335662842 | 8.966279984  | 12.646491051 |
| H | 13.482661247 | 10.636007309 | 10.336409569 |
| H | 15.217617035 | 6.712048531  | 10.104328156 |
| H | 14.405472755 | 10.910912514 | 12.609416962 |
| H | 16.141407013 | 6.984742165  | 12.377204895 |
| H | 15.741855621 | 9.086733818  | 13.646438599 |
| H | 13.766011238 | 7.045858860  | 7.896896362  |
| C | 11.772601128 | 8.864156723  | 8.350060463  |
| C | 10.982177734 | 8.686103821  | 7.202080250  |
| C | 11.154819489 | 9.366143227  | 9.507940292  |
| C | 9.623809814  | 8.998476028  | 7.211319447  |
| C | 9.796498299  | 9.678698540  | 9.517799377  |
| C | 9.024432182  | 9.496326447  | 8.369379997  |
| H | 11.438333511 | 8.299506187  | 6.296029091  |
| H | 11.746097565 | 9.511795998  | 10.406627655 |
| H | 9.032587051  | 8.852546692  | 6.311782360  |
| H | 9.340524673  | 10.065519333 | 10.424697876 |
| H | 7.966097355  | 9.739778519  | 8.376819611  |

=====  
**7CAn1**  
=====

|    |              |              |              |
|----|--------------|--------------|--------------|
| Br | 0.447798073  | 9.890656471  | 2.635499716  |
| Si | 1.492115736  | 7.948027134  | 1.605344415  |
| C  | 1.436171651  | 6.862796307  | 3.055098057  |
| H  | 1.306696415  | 7.453362942  | 3.937915802  |
| Br | -1.753007174 | 11.000905037 | -0.333748877 |
| Br | -1.792595506 | 14.877610207 | -0.315483272 |
| Br | 0.443890989  | 16.011547089 | 2.667049408  |
| Br | 1.833397985  | 12.874362946 | 4.359876156  |
| Br | -1.778671145 | 12.869117737 | 2.993659019  |
| B  | 2.465290546  | 12.083365440 | 1.282183528  |
| H  | 3.240713596  | 11.589176178 | 1.610453606  |
| B  | 1.458559275  | 11.534980774 | -0.076880664 |
| H  | 1.611377358  | 10.680480003 | -0.536714375 |
| B  | 0.800659001  | 12.964942932 | -0.871371150 |
| B  | 1.403711677  | 14.412940025 | -0.015569500 |
| H  | 1.554517031  | 15.253087997 | -0.492008328 |
| B  | 2.441200972  | 13.887371063 | 1.314116359  |
| H  | 3.226031542  | 14.394173622 | 1.636000037  |
| B  | 0.808675587  | 11.566850662 | 1.595125914  |
| B  | -0.239158675 | 12.082560539 | 0.251389533  |
| B  | -0.243348554 | 13.824429512 | 0.296095580  |
| B  | 0.724242508  | 14.448039055 | 1.657714367  |
| B  | 1.419417620  | 12.963745117 | 2.479028463  |
| B  | -0.234340504 | 12.918137550 | 1.827597380  |
| C  | 2.370114088  | 12.984553337 | -0.179065943 |
| H  | 3.158750296  | 13.025039673 | -0.761521995 |
| C  | 3.298810005  | 8.317811966  | 1.003085852  |
| H  | 3.263489246  | 8.868680954  | 0.086463772  |
| H  | 3.811499119  | 8.893121719  | 1.745425940  |
| H  | 3.817916632  | 7.395586967  | 0.845194638  |
| H  | 0.600741684  | 12.971549988 | -2.034293890 |
| H  | 0.617202401  | 6.180944920  | 2.958825350  |
| H  | 2.351577282  | 6.313175201  | 3.124735117  |
| H  | 0.857206762  | 7.423197269  | 0.375773638  |

## =====

**7Ctol**

=====

|    |              |              |              |
|----|--------------|--------------|--------------|
| Si | 13.382635117 | 8.339340210  | 8.394604683  |
| C  | 13.896575928 | 8.843928337  | 10.107615471 |
| H  | 13.153370857 | 8.487014771  | 10.829840660 |
| H  | 13.959135056 | 9.931962013  | 10.218427658 |
| H  | 14.861706734 | 8.405991554  | 10.383521080 |
| C  | 12.794980049 | 10.897164345 | 5.367139339  |
| C  | 13.112977982 | 11.477169037 | 6.611252785  |
| C  | 13.379517555 | 9.668327332  | 5.010582447  |
| C  | 13.986824989 | 10.856393814 | 7.473126411  |
| C  | 14.260676384 | 9.036635399  | 5.860652924  |
| C  | 14.531075478 | 9.574521065  | 7.154073715  |
| H  | 12.676814079 | 12.438920975 | 6.873305321  |
| H  | 13.154644012 | 9.236567497  | 4.038202286  |
| H  | 14.245438576 | 11.318746567 | 8.423905373  |
| H  | 14.735354424 | 8.103379250  | 5.563562393  |
| H  | 15.468533516 | 9.284544945  | 7.642163277  |
| C  | 11.863044739 | 11.600569725 | 4.444270611  |
| H  | 11.695895195 | 11.040204048 | 3.513461590  |
| H  | 10.886981964 | 11.773561478 | 4.935857296  |
| H  | 12.265930176 | 12.599362373 | 4.190233231  |
| H  | 12.044725418 | 8.832950592  | 8.012146950  |
| C  | 13.671905518 | 6.557625294  | 7.971364975  |
| H  | 14.719235420 | 6.266115665  | 8.100814819  |
| H  | 13.078145027 | 5.946375847  | 8.662269592  |
| H  | 13.353043556 | 6.306467056  | 6.955970287  |

## =====

**1CAn2****6A"**

=====

|    |              |              |              |
|----|--------------|--------------|--------------|
| C  | 8.021757126  | 10.761763573 | -3.281394482 |
| C  | 8.004054070  | 11.218891144 | -4.605505466 |
| C  | 7.906239986  | 9.384282112  | -3.041123629 |
| C  | 7.874057770  | 10.324755669 | -5.659748554 |
| C  | 7.779691219  | 8.489935875  | -4.093709469 |
| C  | 7.764840603  | 8.962154388  | -5.403104305 |
| H  | 8.105237961  | 12.281694412 | -4.819608688 |
| H  | 7.938719273  | 9.000131607  | -2.021218300 |
| H  | 7.867685318  | 10.690756798 | -6.683256149 |
| H  | 7.702628613  | 7.423951149  | -3.895260334 |
| H  | 7.671892166  | 8.261642456  | -6.229796410 |
| C  | 7.053943634  | 11.441577911 | -0.420897424 |
| H  | 7.159897804  | 10.388776779 | -0.139521912 |
| H  | 7.265349865  | 12.058264732 | 0.459463507  |
| H  | 6.007342339  | 11.606694221 | -0.707205832 |
| Si | 8.136898994  | 11.921060562 | -1.858521342 |
| C  | 8.193369865  | 13.750068665 | -2.165752172 |
| H  | 7.609805107  | 14.258999825 | -1.390450001 |
| H  | 9.214311600  | 14.147714615 | -2.147037983 |
| H  | 7.761391163  | 13.993015289 | -3.143105507 |
| B  | 13.893969536 | 11.556344032 | -3.638193130 |
| B  | 13.982066154 | 13.152444839 | -2.866436243 |
| B  | 14.563460350 | 12.927792549 | -1.208629012 |
| B  | 14.833851814 | 11.193738937 | -0.955391586 |
| B  | 14.420634270 | 10.347216606 | -2.457519770 |
| B  | 12.693355560 | 10.580378532 | -2.777303219 |
| B  | 12.426569939 | 12.329428673 | -3.029991627 |
| B  | 12.838431358 | 13.184480667 | -1.517638683 |
| B  | 13.373180389 | 11.965435028 | -0.323549777 |
| B  | 13.283541679 | 10.353273392 | -1.103753209 |
| H  | 15.288613319 | 13.722634315 | -0.718674004 |
| H  | 15.740745544 | 10.823599815 | -0.293773741 |
| H  | 15.051695824 | 9.410327911  | -2.806298018 |
| H  | 14.163883209 | 11.437695503 | -4.783178806 |
| H  | 14.310076714 | 14.098199844 | -3.495772600 |
| Br | 11.596141815 | 9.216946602  | -3.702463865 |
| Br | 11.064015388 | 13.020344734 | -4.301564693 |

Br 11.900723457 14.847253799 -0.978316426  
Br 13.082820892 12.207082748 1.617670178  
Br 12.886568069 8.712489128 -0.073393174  
C 15.061839104 11.913794518 -2.468579531  
B 12.081492424 11.593901634 -1.470553994  
H 16.085836411 12.024348259 -2.813990355  
Br 10.217988968 11.318320274 -0.625089169

=====

**2CAn2**

=====

C 8.250500463 13.734453313 -2.483378451  
C 8.126250047 14.621028225 -1.403061017  
C 8.348464455 14.250783800 -3.781795577  
C 8.112877399 15.991719279 -1.615891903  
C 8.329794270 15.622324499 -3.994304749  
C 8.217965381 16.489546013 -2.911993126  
H 8.055261782 14.236826626 -0.384669169  
H 8.449347859 13.578118429 -4.632358574  
H 8.027746129 16.672845544 -0.773047201  
H 8.411652720 16.016391786 -5.003931045  
H 8.213771547 17.564205377 -3.079343150  
C 8.229177266 10.712196233 -3.542935579  
H 9.081380385 10.854193005 -4.215505491  
H 8.268749495 9.691479462 -3.148955837  
H 7.300144542 10.829012423 -4.114898127  
Si 8.245037725 11.931798330 -2.155042211  
B 14.086149531 11.197698691 -3.465553526  
B 14.129347056 12.899670019 -2.960335308  
B 14.576223356 12.952059344 -1.248869259  
B 14.809526303 11.283769260 -0.694556961  
B 14.506352123 10.199787447 -2.065195931  
B 12.811834774 10.375360348 -2.553976731  
B 12.584581934 12.057125715 -3.109968249  
B 12.881613832 13.152925441 -1.729593589  
B 13.311635951 12.145340273 -0.314091621  
B 13.268295602 10.425696954 -0.824172313  
H 15.270301648 13.817728389 -0.840983593  
H 15.657712732 11.029776070 0.088500572  
H 15.152202881 9.219497898 -2.204093287  
H 14.441912780 10.893621709 -4.551269446  
H 14.514134028 13.728524022 -3.710528383  
Br 11.760785954 8.882660545 -3.326843413  
Br 11.352490669 12.535008051 -4.595492123  
Br 11.915983539 14.871775594 -1.548121335  
Br 12.871537399 12.700708586 1.531714973  
Br 12.777776125 8.975938706 0.427258966  
C 15.161864399 11.745370266 -2.282152574  
B 12.112258734 11.586491641 -1.483535388  
H 16.210694887 11.800957599 -2.559588880  
Br 10.189210493 11.395029967 -0.743597344  
H 7.363064173 11.582500274 -1.022566836

=====

**3CAn2          6B''          13A''**

=====

C 7.957245157 10.577114817 -3.473219923  
C 8.426352907 10.907684960 -4.753654493  
C 7.456517166 9.284651546 -3.251767505  
C 8.372524137 9.980704201 -5.785532226  
C 7.416678298 8.354088378 -4.280493047  
C 7.871325227 8.705180590 -5.548104051  
H 8.868778139 11.885834045 -4.937212938  
H 7.098341930 8.997076262 -2.263593953  
H 8.745974594 10.247023850 -6.771194813  
H 7.033775958 7.353673634 -4.094711860  
H 7.842663568 7.975366861 -6.354209139  
C 6.958381210 11.271817611 -0.604210604  
H 7.218338158 10.284978361 -0.206957133

|    |              |              |              |
|----|--------------|--------------|--------------|
| H  | 7.065854642  | 12.007344338 | 0.200771138  |
| H  | 5.904126037  | 11.255529027 | -0.907514163 |
| Si | 7.991816050  | 11.766495061 | -2.072382222 |
| B  | 13.934516770 | 11.903675563 | -3.505385219 |
| B  | 14.015522621 | 13.376243225 | -2.519482599 |
| B  | 14.514252792 | 12.913220738 | -0.884089578 |
| B  | 14.741073990 | 11.156076228 | -0.857625176 |
| B  | 14.385620372 | 10.533058975 | -2.477759273 |
| B  | 12.680630316 | 10.847994755 | -2.837633125 |
| B  | 12.451705059 | 12.623580852 | -2.862311637 |
| B  | 12.812065202 | 13.253686759 | -1.228363367 |
| B  | 13.264055864 | 11.868806174 | -0.192565019 |
| B  | 13.184969820 | 10.381553813 | -1.187133865 |
| H  | 15.228537420 | 13.617622539 | -0.258469533 |
| H  | 15.609158151 | 10.678495237 | -0.212740418 |
| H  | 15.014253280 | 9.637007211  | -2.924640934 |
| H  | 14.258127022 | 11.932767028 | -4.642426862 |
| H  | 14.391940342 | 14.390280533 | -2.997223228 |
| Br | 11.622187866 | 9.626465448  | -3.981890529 |
| Br | 11.146736038 | 13.522938081 | -4.061863654 |
| Br | 11.919062771 | 14.862023014 | -0.487913696 |
| Br | 12.888168979 | 11.848871822 | 1.749696151  |
| Br | 12.721016491 | 8.624990575  | -0.405936148 |
| C  | 15.053562358 | 12.069459188 | -2.247425105 |
| B  | 12.019565016 | 11.689494020 | -1.437760652 |
| H  | 16.094509482 | 12.201327763 | -2.528527990 |
| Br | 10.104513626 | 11.369178664 | -0.741382823 |
| C  | 7.941850534  | 13.562443028 | -2.475624495 |
| C  | 8.386038024  | 14.531794448 | -1.566356481 |
| C  | 7.395537335  | 13.980339299 | -3.698625867 |
| C  | 8.315080084  | 15.881200706 | -1.883296871 |
| C  | 7.316455463  | 15.331852670 | -4.010011376 |
| C  | 7.784735040  | 16.280371231 | -3.106188509 |
| H  | 8.834903058  | 14.234571341 | -0.617900214 |
| H  | 7.037715558  | 13.245609772 | -4.419088095 |
| H  | 8.691463184  | 16.620854066 | -1.180667169 |
| H  | 6.898574760  | 15.644424608 | -4.964098573 |
| H  | 7.739270567  | 17.337541972 | -3.358151525 |

=====  
**4CAn2**      **13B''**      **20B''**  
=====

|    |              |              |              |
|----|--------------|--------------|--------------|
| C  | 8.210325241  | 13.834952354 | -2.808259964 |
| C  | 8.015945435  | 14.829474449 | -1.835089803 |
| C  | 8.594464302  | 14.224206924 | -4.099782944 |
| C  | 8.164151192  | 16.171545029 | -2.153834581 |
| C  | 8.735403061  | 15.568127632 | -4.419736862 |
| C  | 8.514811516  | 16.540369034 | -3.449746847 |
| H  | 7.763094425  | 14.550800323 | -0.811899304 |
| H  | 8.809329033  | 13.470597267 | -4.855725765 |
| H  | 8.017395020  | 16.930551529 | -1.389235854 |
| H  | 9.035779953  | 15.856209755 | -5.424169540 |
| H  | 8.633686066  | 17.592338562 | -3.699714661 |
| Si | 8.008200645  | 12.065782547 | -2.340574741 |
| B  | 14.066254616 | 10.755687714 | -3.008857489 |
| B  | 14.060495377 | 12.527195930 | -2.948365927 |
| B  | 14.364192963 | 13.017896652 | -1.273634791 |
| B  | 14.553152084 | 11.552500725 | -0.297771066 |
| B  | 14.372723579 | 10.154800415 | -1.370605826 |
| B  | 12.728135109 | 10.156119347 | -2.021674156 |
| B  | 12.530056953 | 11.637539864 | -3.005222082 |
| B  | 12.717980385 | 13.051329613 | -1.923017383 |
| B  | 13.024377823 | 12.443010330 | -0.270945460 |
| B  | 13.028823853 | 10.653846741 | -0.332251638 |
| H  | 15.015724182 | 13.977846146 | -1.045218229 |
| H  | 15.333417892 | 11.523726463 | 0.589971542  |
| H  | 15.028280258 | 9.184511185  | -1.206495881 |
| H  | 14.516440392 | 10.193513870 | -3.946876287 |
| H  | 14.507068634 | 13.153895378 | -3.846378326 |



|    |              |              |              |
|----|--------------|--------------|--------------|
| Br | 11.832486153 | 8.439877510  | -2.457650900 |
| Br | 11.378562927 | 11.685427666 | -4.624229908 |
| Br | 11.791244507 | 14.769332886 | -2.243823290 |
| Br | 12.435462952 | 13.434268951 | 1.336494803  |
| Br | 12.440845490 | 9.553266525  | 1.204112291  |
| C  | 15.038346291 | 11.608381271 | -1.918376803 |
| B  | 11.922747612 | 11.581838608 | -1.357124567 |
| H  | 16.106733322 | 11.618045807 | -2.115029812 |
| Br | 9.934174538  | 11.528909683 | -0.794010222 |
| C  | 6.725944519  | 11.765705109 | -1.028436184 |
| C  | 5.682075024  | 12.688148499 | -0.856715679 |
| C  | 6.696147442  | 10.575531006 | -0.284062117 |
| C  | 4.651615143  | 12.436032295 | 0.041848075  |
| C  | 5.673049450  | 10.329940796 | 0.620927453  |
| C  | 4.650714874  | 11.261359215 | 0.785316169  |
| H  | 5.669595242  | 13.612904549 | -1.432605028 |
| H  | 7.483139515  | 9.829927444  | -0.403696328 |
| H  | 3.850159883  | 13.161884308 | 0.163488328  |
| H  | 5.672913551  | 9.408884048  | 1.199457884  |
| H  | 3.849066734  | 11.067758560 | 1.494365692  |
| C  | 8.027348518  | 10.799176216 | -3.684463024 |
| C  | 8.530107498  | 9.505068779  | -3.509073973 |
| C  | 7.432032108  | 11.130061150 | -4.912550449 |
| C  | 8.474762917  | 8.578899384  | -4.541574478 |
| C  | 7.372216225  | 10.199464798 | -5.942886353 |
| C  | 7.901453972  | 8.925921440  | -5.760993481 |
| H  | 9.018089294  | 9.221171379  | -2.577092171 |
| H  | 7.013738632  | 12.123599052 | -5.073700905 |
| H  | 8.898847580  | 7.587995529  | -4.395305157 |
| H  | 6.917505264  | 10.473418236 | -6.892204285 |
| H  | 7.868637085  | 8.202820778  | -6.572475433 |

## =====

**5CAn2 12A'' 19B''**

=====

|    |              |              |              |
|----|--------------|--------------|--------------|
| Si | 8.368066796  | 10.401358520 | -0.597744282 |
| C  | 7.856900153  | 10.544311562 | -2.370244595 |
| H  | 6.926498214  | 9.981093895  | -2.519302991 |
| H  | 7.667828240  | 11.592553432 | -2.627155452 |
| H  | 8.616205838  | 10.152040116 | -3.053983663 |
| B  | 13.512941403 | 10.900454659 | -3.680056648 |
| B  | 13.831059746 | 12.601412634 | -3.308622736 |
| B  | 14.626763497 | 12.674912756 | -1.725763006 |
| B  | 14.800113446 | 11.017871836 | -1.118932602 |
| B  | 14.112289583 | 9.921040251  | -2.325805844 |
| B  | 12.386391669 | 10.265200784 | -2.477076297 |
| B  | 12.203746508 | 11.934194166 | -3.087638820 |
| B  | 12.902849363 | 13.044666162 | -1.871298712 |
| B  | 13.508294844 | 12.055296355 | -0.503203167 |
| B  | 13.181356396 | 10.336604507 | -0.878705597 |
| H  | 15.471882306 | 13.475335576 | -1.520897642 |
| H  | 15.762213050 | 10.703168399 | -0.508562974 |
| H  | 14.602920393 | 8.865271332  | -2.531434567 |
| H  | 13.604583559 | 10.497090993 | -4.787554930 |
| H  | 14.142534351 | 13.350203145 | -4.168592414 |
| Br | 11.145097084 | 8.795220345  | -2.989021967 |
| Br | 10.678209046 | 12.458732106 | -4.238726670 |
| Br | 12.208133850 | 14.876937899 | -1.610594680 |
| Br | 13.519298134 | 12.732633598 | 1.353906343  |
| Br | 12.791037957 | 9.005851600  | 0.536883536  |
| C  | 14.860894592 | 11.369128503 | -2.773652194 |
| B  | 12.040670920 | 11.587010906 | -1.367980322 |
| H  | 15.829857934 | 11.291651050 | -3.258595564 |
| Br | 10.279342246 | 11.934838753 | -0.336526275 |
| C  | 8.945437855  | 8.777673327  | 0.075813397  |
| H  | 8.102255927  | 8.074938948  | 0.086377289  |
| H  | 9.752705925  | 8.344037897  | -0.522749971 |
| H  | 9.303308395  | 8.899775176  | 1.104183489  |
| C  | 7.265288555  | 11.341142854 | 0.571731865  |

|   |             |              |             |
|---|-------------|--------------|-------------|
| H | 6.294980567 | 10.832806156 | 0.638508703 |
| H | 7.689019295 | 11.384870906 | 1.580791376 |
| H | 7.083171758 | 12.363544961 | 0.223715164 |

=====  
**6CAn2**  
=====

|    |              |              |              |
|----|--------------|--------------|--------------|
| C  | 7.402680428  | 10.284839944 | -1.875122560 |
| C  | 7.366303578  | 9.441629575  | -2.994649827 |
| C  | 6.794916657  | 9.860630974  | -0.682896533 |
| C  | 6.722735978  | 8.211837791  | -2.928573099 |
| C  | 6.159095715  | 8.629122380  | -0.616780270 |
| C  | 6.121660580  | 7.807742720  | -1.741158996 |
| H  | 7.853838126  | 9.745901063  | -3.920848770 |
| H  | 6.827970538  | 10.495179273 | 0.204026850  |
| H  | 6.699665574  | 7.563502441  | -3.801145035 |
| H  | 5.696883263  | 8.304126742  | 0.312365716  |
| H  | 5.626209051  | 6.840949334  | -1.687264444 |
| Si | 8.286700952  | 11.893612830 | -1.993766285 |
| B  | 13.725893934 | 11.944952897 | -3.697351054 |
| B  | 14.175055195 | 13.174561168 | -2.500925068 |
| B  | 14.772398497 | 12.341989678 | -1.055835574 |
| B  | 14.697188360 | 10.596266857 | -1.359312873 |
| B  | 14.052971626 | 10.351407492 | -2.991077617 |
| B  | 12.398610380 | 10.978944075 | -3.038776828 |
| B  | 12.475416934 | 12.740869624 | -2.733114129 |
| B  | 13.126225629 | 12.989914582 | -1.088903424 |
| B  | 13.452136974 | 11.379672087 | -0.375880947 |
| B  | 13.003239440 | 10.134968163 | -1.583591683 |
| H  | 15.665723591 | 12.800029669 | -0.431850113 |
| H  | 15.540557705 | 9.882474871  | -0.939187784 |
| H  | 14.458676278 | 9.473929886  | -3.671630785 |
| H  | 13.911518179 | 12.137351846 | -4.848939133 |
| H  | 14.661066314 | 14.193436169 | -2.852046621 |
| Br | 11.036716196 | 10.151583838 | -4.227334139 |
| Br | 11.215206785 | 14.040528125 | -3.558683735 |
| Br | 12.582953115 | 14.539885928 | 0.017664726  |
| Br | 13.295224962 | 11.049194622 | 1.567258352  |
| Br | 12.321273136 | 8.356797442  | -1.055866244 |
| C  | 14.996163248 | 11.700916521 | -2.606232451 |
| B  | 12.063142992 | 11.623256854 | -1.437079448 |
| H  | 16.003772397 | 11.727735644 | -3.011186252 |
| Br | 10.229460324 | 11.533135460 | -0.498145441 |
| H  | 8.938571640  | 12.124633304 | -3.286773247 |
| C  | 7.492834059  | 13.327525257 | -1.143982636 |
| C  | 6.127976819  | 13.265287239 | -0.822575224 |
| C  | 8.203679076  | 14.506478695 | -0.867510256 |
| C  | 5.489418037  | 14.353725546 | -0.240144658 |
| C  | 7.562489137  | 15.589897903 | -0.283396241 |
| C  | 6.206944999  | 15.514151548 | 0.029904500  |
| H  | 5.558223174  | 12.359856090 | -1.031244872 |
| H  | 9.266879979  | 14.578976459 | -1.103198088 |
| H  | 4.431316942  | 14.293829907 | 0.004921955  |
| H  | 8.124044303  | 16.495788491 | -0.068650896 |
| H  | 5.708903202  | 16.364476049 | 0.490065981  |

=====  
**7CAn2**  
=====

|    |              |              |              |
|----|--------------|--------------|--------------|
| Si | 8.136898994  | 11.921060562 | -1.858521342 |
| B  | 13.893969536 | 11.556344032 | -3.638193130 |
| B  | 13.982066154 | 13.152444839 | -2.866436243 |
| B  | 14.563460350 | 12.927792549 | -1.208629012 |
| B  | 14.833851814 | 11.193738937 | -0.955391586 |
| B  | 14.420634270 | 10.347216606 | -2.457519770 |
| B  | 12.693355560 | 10.580378532 | -2.777303219 |
| B  | 12.426569939 | 12.329428673 | -3.029991627 |
| B  | 12.838431358 | 13.184480667 | -1.517638683 |
| B  | 13.373180389 | 11.965435028 | -0.323549777 |

B 13.283541679 10.353273392 -1.103753209  
H 15.288613319 13.722634315 -0.718674004  
H 15.740745544 10.823599815 -0.293773741  
H 15.051695824 9.410327911 -2.806298018  
H 14.163883209 11.437695503 -4.783178806  
H 14.310076714 14.098199844 -3.495772600  
Br 11.596141815 9.216946602 -3.702463865  
Br 11.064015388 13.020344734 -4.301564693  
Br 11.900723457 14.847253799 -0.978316426  
Br 13.082820892 12.207082748 1.617670178  
Br 12.886568069 8.712489128 -0.073393174  
C 15.061839104 11.913794518 -2.468579531  
B 12.081492424 11.593901634 -1.470553994  
H 16.085836411 12.024348259 -2.813990355  
Br 10.217988968 11.318320274 -0.625089169  
H 8.150233269 12.491481781 -3.224113703  
C 7.510198116 13.337146759 -0.828206778  
H 6.500187874 13.635159492 -1.131812334  
H 7.470396042 13.070710182 0.234118626  
H 8.156678200 14.216935158 -0.923836648  
C 7.234705448 10.310049057 -2.082768440  
H 7.294856548 9.959991455 -3.119566679  
H 7.655459404 9.524866104 -1.444363594  
H 6.173164368 10.408473015 -1.828696847

=====  
**HB**  
=====

H -1.276532650 0.281050414 -1.913004279  
C -0.235942662 -1.936623931 -3.004189730  
H 0.461550206 -2.021986485 -2.164046288  
H -0.431268960 -2.950150967 -3.374453306  
H 0.249904290 -1.376176000 -3.811054707  
Si -1.839155912 -1.139718771 -2.515994072  
C -2.935887337 -0.568426788 -3.898745537  
H -2.346779346 -0.168973044 -4.732090473  
H -3.527877808 -1.412610173 -4.272422314  
H -3.636975050 0.208475769 -3.571310759  
C -0.571075320 2.014848232 -3.917828083  
C 0.446768403 1.457890868 -4.708979607  
C -1.604345441 2.722030640 -4.551843643  
C 0.420226187 1.585317135 -6.091850758  
C -1.626990199 2.856836557 -5.934386253  
C -0.619424462 2.281410217 -6.703754425  
H 1.276080966 0.924924552 -4.242466927  
H -2.402148008 3.174044847 -3.962534428  
H 1.213231206 1.149941921 -6.694078922  
H -2.429880619 3.410635471 -6.413714409  
H -0.639690936 2.382577896 -7.785757065  
C 1.034819961 1.443572998 -1.275003433  
H 0.899970591 1.114492416 -0.239167020  
H 1.623669267 0.686107695 -1.803402781  
H 1.624911308 2.368054867 -1.258699775  
Si -0.599355221 1.759700298 -2.094911337  
C -1.857131958 2.750435829 -1.157088161  
H -2.869163752 2.585499525 -1.544637680  
H -1.853272319 2.485917807 -0.095086440  
H -1.638222933 3.821675301 -1.240389228  
C -2.826726198 -2.333072662 -1.486328483  
H -3.800701141 -1.912171245 -1.211877465  
H -3.011810064 -3.268276215 -2.026926279  
H -2.303248167 -2.586789608 -0.557508230

## 9.7 Vibrational Frequencies (cm<sup>-1</sup>) of the Calculated Structures

### 00-Carborate

68.47 68.69 75.66 75.76 79.72 79.84  
88.02 88.26 100.73 193.75 193.83 194.42  
239.92 239.96 253.78 302.92 329.55 329.75  
541.13 541.26 582.92 583.07 597.45 609.62  
609.75 637.80 638.09 645.67 712.62 712.77  
740.69 740.76 764.59 792.15 792.32 812.16  
812.22 816.03 816.12 821.89 824.62 824.77  
846.80 847.03 859.50 859.62 903.58 905.49  
905.70 905.76 940.47 940.62 947.46 947.82  
956.72 982.34 982.38 1058.72 1119.37 1119.42  
2711.00 2711.35 2716.75 2716.89 2723.44 3204.82

### 1A

29.05 83.74 131.57 145.02 152.73 177.02  
230.75 287.20 380.94 398.96 466.82 602.96  
624.44 648.02 693.84 705.08 710.71 728.17  
737.73 778.27 852.55 864.06 899.77 901.39  
924.73 973.17 997.55 1006.30 1056.48 1098.69  
1139.87 1162.53 1195.40 1275.82 1280.78 1316.18  
1364.74 1434.03 1436.75 1443.45 1447.96 1461.09  
1517.15 1641.94 1665.60 2253.18 3036.55 3037.69  
3128.31 3129.49 3134.41 3143.43 3144.23 3151.49  
3168.38 3178.74 3190.75

### 2A

56.42 56.94 74.70 76.86 77.73 113.44  
232.98 235.59 246.04 287.09 324.64 325.14  
408.20 408.86 428.15 429.01 471.87 472.74  
612.54 613.20 613.67 626.85 627.72 665.69  
690.98 691.56 711.44 718.12 776.48 776.78  
813.50 854.04 854.87 857.09 932.26 933.48  
962.58 967.18 968.12 991.44 992.19 993.36  
1004.36 1004.44 1005.19 1021.35 1021.61 1022.27  
1054.33 1055.41 1055.46 1115.52 1119.60 1120.43  
1173.75 1173.84 1174.81 1193.70 1194.20 1197.50  
1224.79 1314.63 1321.14 1322.13 1380.68 1382.27  
1395.03 1410.66 1411.23 1472.05 1482.51 1483.15  
1514.45 1523.24 1523.52 1621.05 1624.18 1624.55  
1656.07 1656.78 1670.97 3190.22 3190.41 3190.56  
3194.87 3195.93 3196.49 3198.50 3198.57 3199.68  
3208.43 3208.69 3209.00 3212.95 3213.11 3213.50

### 3A

6.71 21.97 34.28 38.87 45.48 52.21  
61.71 69.03 71.43 79.56 80.65 85.58  
108.46 122.55 130.48 140.05 168.84 186.53  
235.52 237.00 245.51 249.51 276.48 285.66  
322.60 324.63 373.92 400.25 407.68 410.78  
427.51 430.75 458.63 471.59 474.29 607.16  
609.41 611.15 612.35 623.90 624.82 625.95  
647.20 665.05 689.84 691.72 696.89 701.69  
705.95 708.69 710.51 719.08 769.65 774.69  
775.50 776.67 811.74 849.45 851.19 852.95  
856.64 867.91 901.61 909.04 926.68 928.54  
931.07 959.93 964.45 969.47 974.50 989.33  
989.77 994.35 998.05 1002.26 1002.89 1003.30  
1007.53 1017.68 1019.09 1019.72 1051.82 1053.97

1054.65 1055.70 1098.90 1114.58 1118.37 1120.71  
1136.33 1164.50 1170.78 1171.75 1172.86 1192.79  
1193.57 1195.41 1196.59 1221.55 1281.42 1287.79  
1314.20 1314.44 1320.76 1321.06 1363.19 1377.77  
1381.55 1394.44 1408.65 1410.78 1432.40 1435.75  
1442.75 1446.62 1458.56 1469.97 1480.94 1481.71  
1513.09 1514.37 1521.53 1522.65 1620.25 1624.27  
1625.41 1637.19 1656.51 1657.73 1660.65 1670.75  
2199.72 3038.62 3042.67 3132.16 3135.81 3137.31  
3139.82 3142.08 3157.81 3172.92 3180.77 3187.64  
3188.60 3190.62 3192.96 3194.51 3195.07 3197.90  
3199.36 3200.18 3201.24 3205.76 3206.25 3209.48  
3212.12 3212.35 3213.48

=====  
**3A-TS**  
=====

-425.05 11.46 29.52 32.46 50.48 58.71  
65.47 69.57 79.26 84.07 87.02 114.58  
120.99 131.20 135.98 147.72 161.02 193.95  
220.77 244.69 248.46 258.90 278.83 294.25  
318.73 321.60 322.01 388.64 395.97 408.18  
408.99 427.76 456.76 487.81 487.98 496.00  
614.21 614.79 619.61 620.42 627.19 628.78  
647.99 677.57 693.09 699.18 701.23 703.25  
708.52 718.04 726.06 744.86 755.61 767.88  
769.41 796.12 813.25 849.88 852.86 857.13  
857.47 863.55 914.02 915.34 935.60 943.45  
947.76 951.22 980.22 981.82 982.79 986.20  
998.24 1001.07 1003.37 1007.15 1008.55 1012.45  
1012.83 1014.06 1015.25 1018.67 1054.88 1055.65  
1058.15 1059.16 1103.81 1106.17 1114.23 1115.79  
1121.51 1141.82 1169.16 1169.61 1169.90 1170.21  
1190.21 1190.56 1196.27 1197.45 1280.96 1282.57  
1298.44 1304.27 1306.60 1315.13 1340.28 1343.51  
1354.16 1370.99 1389.73 1391.77 1411.20 1417.81  
1420.92 1429.12 1434.17 1461.46 1474.09 1483.46  
1484.24 1511.87 1520.83 1521.63 1534.55 1634.61  
1639.01 1642.30 1642.70 1658.06 1664.01 1664.23  
1679.79 3034.91 3039.82 3129.93 3134.22 3139.36  
3141.95 3143.49 3154.76 3162.45 3166.75 3170.07  
3180.89 3187.79 3188.36 3188.77 3190.53 3196.45  
3196.92 3197.15 3200.18 3203.26 3204.48 3204.66  
3209.79 3211.73 3212.02

=====  
**4A**  
=====

6.11 10.16 16.05 37.50 49.86 53.29  
63.91 68.23 69.92 81.97 96.31 108.31  
125.96 141.62 142.75 157.10 166.22 202.50  
228.73 238.16 244.12 245.79 273.30 293.69  
305.21 313.96 375.39 393.49 407.45 408.60  
418.06 443.11 464.81 491.62 495.55 610.75  
611.86 616.16 619.99 624.61 627.63 641.95  
672.02 692.59 700.74 704.64 707.16 708.66  
728.51 734.53 739.48 749.14 760.44 762.82  
791.20 818.85 845.32 852.64 855.92 858.04  
860.66 869.18 887.66 890.10 926.58 937.59  
941.16 945.72 971.78 980.10 982.76 984.15  
1003.11 1005.33 1006.23 1007.21 1008.67 1009.62  
1011.68 1020.51 1054.98 1055.69 1057.22 1058.40  
1090.94 1095.72 1108.87 1110.00 1115.48 1116.31  
1139.24 1166.41 1167.56 1168.07 1173.59 1184.61  
1189.55 1191.00 1196.17 1199.62 1271.59 1274.82  
1281.09 1286.30 1318.13 1318.33 1329.90 1332.88  
1373.80 1378.87 1379.53 1383.24 1408.32 1416.39  
1417.85 1423.92 1462.26 1474.13 1482.80 1483.42  
1509.09 1521.95 1525.57 1526.70 1632.22 1644.94

1652.03 1654.35 1654.59 1668.11 1671.64 1673.71  
2174.53 3029.78 3032.68 3121.84 3122.04 3140.45  
3142.23 3147.98 3150.74 3156.44 3160.38 3167.11  
3174.15 3179.44 3183.45 3183.95 3184.88 3188.78  
3189.45 3192.62 3195.68 3197.39 3200.59 3200.84  
3203.20 3205.66 3207.41

=====  
**5A**  
=====

21.99 25.45 50.30 59.91 60.26 78.62  
218.42 234.25 234.80 270.70 299.69 300.47  
408.26 408.68 413.27 474.09 499.78 501.06  
609.21 609.98 620.77 623.03 626.54 663.84  
707.68 708.30 710.10 740.52 763.22 763.91  
833.34 852.02 852.55 854.73 879.18 880.30  
924.46 925.21 926.68 967.04 967.63 968.34  
990.92 991.39 991.84 1008.76 1009.34 1009.57  
1058.44 1060.09 1060.38 1102.72 1102.93 1105.84  
1160.89 1161.21 1161.35 1187.13 1187.53 1188.89  
1199.06 1212.85 1213.66 1289.56 1290.06 1322.70  
1341.99 1342.02 1372.26 1383.33 1383.60 1479.77  
1486.18 1486.29 1530.04 1530.79 1530.80 1655.40  
1659.93 1660.18 1677.86 1677.89 1683.32 3002.76  
3153.70 3153.82 3154.10 3167.67 3167.76 3168.50  
3175.71 3175.99 3177.18 3183.30 3183.56 3184.58  
3194.20 3194.35 3194.83

=====  
**6A**  
=====

81.77 109.88 132.62 229.86 279.93 306.08  
348.19 388.18 391.50 428.38 515.00 612.19  
648.87 679.04 751.83 753.60 768.89 784.71  
853.41 862.27 884.12 944.80 954.94 991.08  
1001.92 1029.87 1051.92 1115.00 1150.42 1177.72  
1203.59 1310.00 1324.00 1352.78 1390.20 1420.22  
1425.67 1445.34 1445.98 1463.65 1503.85 1621.80  
1651.79 2720.91 2829.99 2885.01 2904.70 2995.17  
3046.45 3172.12 3176.98 3193.31 3208.10 3212.54

=====  
**7A**  
=====

14.75 21.52 33.91 46.49 51.69 59.65  
112.62 115.21 126.06 131.33 137.44 147.21  
151.34 153.68 160.59 188.90 199.18 205.96  
235.06 279.88 294.26 306.66 372.45 390.41  
396.47 398.29 449.30 462.05 614.37 619.25  
620.22 644.85 649.46 698.01 701.03 703.95  
720.78 723.98 726.15 743.69 747.23 752.52  
769.19 804.64 809.10 833.05 859.47 863.14  
864.39 864.65 875.48 939.60 940.76 969.37  
984.69 984.80 1003.10 1005.13 1018.99 1019.91  
1053.51 1055.55 1106.23 1108.23 1138.87 1141.62  
1171.75 1172.16 1198.29 1199.71 1283.49 1287.39  
1288.93 1294.54 1317.21 1317.61 1369.43 1371.90  
1414.87 1417.49 1419.10 1422.25 1426.37 1427.72  
1431.36 1434.16 1461.65 1462.71 1511.24 1512.88  
1632.34 1636.21 1655.94 1657.49 1851.96 3039.59  
3041.51 3043.21 3043.72 3135.78 3137.78 3138.05  
3138.45 3143.08 3145.13 3146.73 3148.96 3151.18  
3152.63 3152.85 3159.91 3181.23 3186.79 3188.76  
3197.99 3200.81 3206.82

=====  
**7A-TS**  
=====

|         |         |         |         |         |         |
|---------|---------|---------|---------|---------|---------|
| -122.95 | 14.74   | 28.80   | 47.14   | 66.82   | 72.16   |
| 79.85   | 95.33   | 114.88  | 124.83  | 140.72  | 149.89  |
| 154.47  | 161.05  | 167.55  | 178.01  | 189.32  | 217.62  |
| 235.31  | 252.26  | 285.01  | 293.48  | 367.58  | 379.17  |
| 393.49  | 399.95  | 439.47  | 450.24  | 615.76  | 621.48  |
| 621.67  | 642.53  | 649.76  | 675.94  | 691.60  | 697.48  |
| 705.35  | 714.78  | 722.82  | 729.47  | 751.31  | 753.56  |
| 759.98  | 787.15  | 807.29  | 824.71  | 854.85  | 859.32  |
| 871.40  | 875.72  | 906.79  | 916.13  | 941.37  | 948.51  |
| 987.19  | 988.83  | 1002.62 | 1004.44 | 1015.76 | 1024.37 |
| 1052.84 | 1053.22 | 1101.17 | 1111.29 | 1132.66 | 1140.41 |
| 1169.14 | 1174.47 | 1196.60 | 1200.54 | 1277.74 | 1283.66 |
| 1285.39 | 1290.10 | 1314.79 | 1317.84 | 1365.88 | 1378.17 |
| 1398.46 | 1408.10 | 1410.86 | 1422.46 | 1425.76 | 1428.82 |
| 1436.42 | 1437.67 | 1458.71 | 1462.72 | 1507.54 | 1510.66 |
| 1628.38 | 1629.76 | 1651.66 | 1655.02 | 2129.16 | 3026.05 |
| 3032.11 | 3035.48 | 3043.27 | 3125.32 | 3126.23 | 3127.53 |
| 3129.49 | 3140.73 | 3141.67 | 3148.81 | 3153.73 | 3157.70 |
| 3159.92 | 3160.57 | 3161.54 | 3179.31 | 3186.16 | 3187.04 |
| 3196.23 | 3198.43 | 3204.36 |         |         |         |

=====  
**8A**  
=====

|         |         |         |         |         |         |
|---------|---------|---------|---------|---------|---------|
| 19.41   | 28.38   | 39.60   | 42.56   | 63.49   | 110.16  |
| 123.91  | 135.22  | 141.15  | 155.55  | 164.91  | 171.99  |
| 173.58  | 186.11  | 193.19  | 203.67  | 216.31  | 223.82  |
| 251.27  | 264.30  | 304.74  | 308.18  | 340.06  | 386.74  |
| 396.26  | 397.85  | 466.87  | 480.81  | 607.01  | 615.54  |
| 620.62  | 635.68  | 655.80  | 673.65  | 688.48  | 700.62  |
| 703.22  | 713.11  | 715.82  | 737.38  | 745.37  | 749.76  |
| 776.03  | 783.79  | 802.07  | 814.78  | 853.75  | 860.21  |
| 860.78  | 875.12  | 889.23  | 908.87  | 934.33  | 978.39  |
| 994.55  | 999.59  | 1004.26 | 1012.53 | 1013.81 | 1022.86 |
| 1037.39 | 1055.99 | 1056.27 | 1104.46 | 1106.65 | 1137.09 |
| 1169.85 | 1177.22 | 1197.99 | 1199.12 | 1282.92 | 1286.08 |
| 1291.76 | 1292.93 | 1300.92 | 1317.20 | 1369.34 | 1380.77 |
| 1421.86 | 1423.17 | 1426.05 | 1428.88 | 1432.40 | 1435.85 |
| 1440.73 | 1441.86 | 1460.91 | 1463.67 | 1484.55 | 1515.30 |
| 1608.79 | 1639.82 | 1644.55 | 1660.81 | 2304.88 | 3038.42 |
| 3040.35 | 3044.43 | 3045.65 | 3130.54 | 3133.08 | 3135.37 |
| 3135.51 | 3148.64 | 3150.02 | 3152.16 | 3153.63 | 3155.89 |
| 3157.46 | 3158.23 | 3165.10 | 3184.46 | 3190.12 | 3193.96 |
| 3203.39 | 3206.18 | 3210.28 |         |         |         |

=====  
**8A-TS**  
=====

|         |         |         |         |         |         |
|---------|---------|---------|---------|---------|---------|
| -169.80 | 19.53   | 37.24   | 38.62   | 45.65   | 105.61  |
| 118.44  | 131.21  | 133.06  | 139.21  | 145.01  | 170.33  |
| 174.12  | 188.56  | 199.19  | 202.14  | 210.26  | 214.08  |
| 222.15  | 233.10  | 291.63  | 320.08  | 342.85  | 381.33  |
| 396.80  | 403.82  | 451.45  | 480.57  | 612.08  | 621.93  |
| 623.45  | 638.55  | 643.21  | 659.88  | 677.17  | 688.75  |
| 689.59  | 706.83  | 714.21  | 737.78  | 742.87  | 748.60  |
| 759.78  | 790.32  | 797.30  | 821.46  | 849.07  | 857.54  |
| 863.42  | 886.64  | 893.49  | 911.12  | 931.12  | 975.54  |
| 978.32  | 995.32  | 1003.62 | 1009.41 | 1012.56 | 1029.82 |
| 1044.30 | 1055.40 | 1083.06 | 1101.83 | 1105.64 | 1138.52 |
| 1169.26 | 1174.06 | 1196.22 | 1198.69 | 1284.38 | 1285.25 |
| 1291.39 | 1296.06 | 1302.54 | 1316.96 | 1365.12 | 1377.27 |
| 1416.29 | 1419.49 | 1424.59 | 1428.78 | 1432.53 | 1434.95 |
| 1438.82 | 1442.99 | 1444.72 | 1461.92 | 1490.96 | 1514.68 |
| 1604.45 | 1636.17 | 1641.54 | 1660.37 | 2326.48 | 3035.55 |
| 3039.40 | 3042.47 | 3045.70 | 3128.79 | 3131.66 | 3134.25 |
| 3134.48 | 3135.19 | 3138.69 | 3140.70 | 3144.62 | 3155.22 |

3158.23 3170.75 3175.38 3177.42 3183.30 3190.46  
3195.57 3198.67 3207.75

## =====

**9A**

=====

12.33 22.70 39.30 62.04 86.39 95.33  
107.66 129.93 135.46 148.41 160.97 170.13  
178.27 186.13 189.32 194.99 205.90 216.14  
233.14 252.75 302.60 325.70 350.59 395.16  
407.13 441.16 463.57 488.91 612.93 622.37  
628.38 642.55 662.39 674.53 689.34 694.83  
706.66 709.44 711.38 715.22 740.78 753.16  
766.83 788.17 795.32 821.77 845.89 854.32  
861.76 875.16 911.19 915.14 929.77 952.54  
976.19 993.79 1004.56 1011.62 1014.33 1035.24  
1046.86 1057.18 1073.43 1102.64 1104.19 1139.38  
1169.27 1173.59 1190.41 1197.65 1281.04 1289.34  
1289.85 1294.05 1302.95 1317.27 1368.57 1391.16  
1418.44 1422.16 1428.17 1430.61 1432.08 1433.57  
1436.15 1440.61 1441.99 1461.85 1491.24 1516.15  
1590.10 1638.54 1640.35 1662.07 2333.21 3037.26  
3037.75 3043.62 3048.64 3087.07 3131.16 3131.71  
3137.30 3137.68 3137.88 3139.74 3140.00 3149.65  
3157.84 3163.34 3165.44 3182.35 3186.21 3189.41  
3191.69 3201.81 3212.36

## =====

**9A-TS**

=====

-105.48 25.81 35.31 47.87 56.33 62.28  
71.23 103.80 108.74 128.70 136.17 148.95  
162.14 169.83 174.18 187.25 208.36 214.12  
243.06 248.14 270.26 359.00 396.58 401.89  
421.20 445.66 467.11 477.10 527.68 608.09  
622.85 623.50 630.98 634.72 674.83 682.93  
685.39 701.72 708.37 712.84 735.29 741.12  
756.21 766.38 793.13 809.32 831.80 851.21  
861.45 871.82 878.84 917.07 927.76 941.20  
977.14 988.26 1004.06 1004.31 1012.08 1015.37  
1055.63 1058.45 1100.99 1105.51 1133.67 1143.20  
1168.44 1169.65 1197.01 1199.55 1204.06 1286.03  
1287.27 1294.37 1312.88 1317.96 1365.19 1367.73  
1396.57 1400.80 1407.79 1413.71 1423.30 1428.46  
1430.30 1457.92 1461.39 1510.24 1513.39 1519.34  
1636.15 1639.50 1658.77 1662.96 2392.05 2798.27  
3029.11 3038.32 3040.59 3064.55 3122.79 3123.62  
3131.27 3137.07 3139.86 3141.73 3143.54 3145.58  
3152.37 3154.62 3161.22 3182.70 3183.31 3190.89  
3192.13 3202.01 3203.16

## =====

**10A**

=====

10.32 14.53 26.51 32.21 44.69 55.96  
83.95 109.25 135.86 144.00 148.89 155.15  
163.29 170.15 199.50 205.79 218.59 223.56  
240.08 263.87 271.48 305.24 366.82 393.17  
398.32 446.90 459.03 473.92 528.04 617.86  
619.75 620.87 656.51 673.85 691.86 701.49  
705.03 706.61 717.12 739.92 746.45 752.62  
766.08 777.80 808.19 814.33 858.45 859.92  
864.71 885.53 905.72 934.70 942.46 980.79  
985.56 997.79 1003.37 1004.01 1017.63 1018.59  
1023.47 1056.41 1057.23 1106.03 1108.82 1135.07  
1147.52 1172.03 1172.13 1198.78 1200.99 1293.18  
1294.59 1299.33 1314.87 1320.20 1350.04 1368.35  
1371.10 1373.07 1420.80 1424.54 1427.31 1427.92  
1432.88 1438.33 1460.31 1463.52 1512.85 1515.25



1637.26 1639.24 1659.09 1660.31 2329.94 3018.27  
3040.95 3043.65 3044.96 3130.36 3137.34 3139.05  
3140.97 3144.36 3145.64 3148.42 3148.88 3163.08  
3166.60 3187.51 3187.71 3197.27 3197.97 3200.33  
3206.13 3206.29 3209.17

=====  
**10A-TS**  
=====

-68.24 26.86 31.87 37.30 43.73 51.21  
58.55 72.77 82.68 93.53 115.08 140.82  
149.90 156.61 161.61 169.20 190.30 196.23  
219.37 224.58 249.96 275.23 366.08 390.59  
401.29 441.14 446.04 461.84 562.67 607.42  
615.72 616.90 618.21 660.75 670.86 690.33  
696.89 697.44 723.01 726.59 740.60 751.65  
755.20 786.97 820.11 832.02 840.73 858.32  
860.96 866.58 920.82 924.64 947.84 956.93  
988.22 995.20 1001.74 1003.85 1024.06 1025.26  
1053.95 1055.01 1107.50 1113.86 1134.85 1147.63  
1174.70 1175.14 1200.35 1203.83 1253.85 1284.72  
1285.57 1291.49 1312.54 1322.70 1378.57 1380.89  
1403.45 1416.54 1428.27 1430.27 1432.97 1441.21  
1447.48 1451.80 1459.66 1464.30 1506.14 1508.02  
1627.55 1630.04 1651.92 1655.16 2231.28 3005.11  
3034.65 3039.71 3043.21 3090.83 3104.91 3126.59  
3131.58 3139.21 3142.95 3143.95 3161.14 3166.90  
3170.24 3170.74 3180.76 3191.48 3192.02 3203.71  
3203.97 3209.84 3210.02

=====  
**11A**  
=====

8.00 19.72 36.15 45.95 57.70 67.50  
72.92 110.20 119.24 134.55 138.95 140.86  
143.96 163.49 167.43 181.14 194.91 202.71  
215.13 233.32 245.85 320.81 367.37 395.02  
402.08 453.69 456.69 466.10 611.68 619.53  
620.43 642.39 671.73 673.20 683.57 701.58  
706.16 719.22 732.39 747.70 749.80 755.79  
758.37 776.04 812.09 839.51 856.21 863.76  
869.37 877.20 896.28 940.01 947.70 984.51  
990.74 991.91 1003.39 1004.80 1018.53 1020.88  
1055.37 1055.76 1103.59 1107.48 1134.32 1147.52  
1172.15 1172.46 1196.99 1199.48 1285.26 1286.06  
1287.12 1293.35 1313.75 1320.96 1371.77 1373.76  
1412.57 1415.26 1418.52 1421.87 1423.47 1427.02  
1429.68 1437.10 1459.69 1463.96 1511.74 1512.84  
1635.37 1637.89 1656.94 1658.45 1886.24 3039.41  
3040.87 3042.54 3043.20 3133.78 3135.81 3136.75  
3137.16 3140.20 3143.46 3148.84 3150.51 3153.32  
3157.01 3162.93 3166.94 3187.82 3188.14 3197.79  
3198.52 3206.20 3206.42

=====  
**12A Me3Si+**  
=====

29.95 35.06 66.20 198.48 199.16 211.54  
606.76 632.77 635.35 699.57 757.78 759.49  
835.87 902.00 902.54 1283.50 1283.75 1288.76  
1391.78 1391.88 1393.79 1394.58 1400.83 1401.85  
3028.54 3028.98 3032.11 3110.78 3111.84 3112.05  
3166.21 3166.77 3167.63

=====  
**12A Ph2MeSiH**  
=====

|         |         |         |         |         |         |
|---------|---------|---------|---------|---------|---------|
| 17.45   | 34.08   | 51.56   | 94.28   | 124.50  | 144.25  |
| 170.18  | 209.17  | 236.21  | 285.58  | 386.32  | 398.09  |
| 401.06  | 422.28  | 460.23  | 481.06  | 623.92  | 624.59  |
| 656.25  | 691.09  | 702.49  | 707.13  | 709.73  | 729.14  |
| 735.50  | 751.35  | 773.95  | 847.88  | 864.17  | 868.88  |
| 896.65  | 924.86  | 930.26  | 973.56  | 978.28  | 998.18  |
| 1000.04 | 1004.18 | 1005.91 | 1055.00 | 1056.38 | 1098.31 |
| 1100.05 | 1132.84 | 1141.10 | 1162.65 | 1162.98 | 1195.57 |
| 1197.50 | 1278.88 | 1314.49 | 1315.94 | 1360.57 | 1363.44 |
| 1437.92 | 1439.56 | 1459.68 | 1461.28 | 1514.68 | 1516.46 |
| 1636.05 | 1640.55 | 1662.93 | 1664.51 | 2248.15 | 3038.62 |
| 3128.43 | 3133.18 | 3138.06 | 3141.39 | 3145.53 | 3151.30 |
| 3161.98 | 3168.92 | 3169.65 | 3178.88 | 3186.81 | 3191.92 |

=====  
**13A Me3SiH**  
=====

|         |         |         |         |         |         |
|---------|---------|---------|---------|---------|---------|
| 137.73  | 147.51  | 148.11  | 179.14  | 179.58  | 213.57  |
| 595.97  | 596.23  | 622.66  | 659.45  | 707.50  | 707.88  |
| 841.41  | 841.96  | 869.11  | 918.57  | 918.84  | 1275.97 |
| 1276.09 | 1283.60 | 1434.51 | 1436.73 | 1436.90 | 1448.04 |
| 1448.13 | 1454.70 | 2245.47 | 3035.41 | 3037.06 | 3037.22 |
| 3129.34 | 3129.91 | 3129.98 | 3138.36 | 3138.42 | 3138.85 |

=====  
**13A Ph2MeSi+**  
=====

|         |         |         |         |         |         |
|---------|---------|---------|---------|---------|---------|
| 32.95   | 44.26   | 74.10   | 78.91   | 92.89   | 147.75  |
| 148.72  | 223.30  | 249.92  | 277.34  | 366.57  | 389.61  |
| 399.51  | 435.47  | 441.37  | 464.21  | 614.51  | 615.60  |
| 672.15  | 686.28  | 692.93  | 727.28  | 739.77  | 752.39  |
| 754.48  | 787.30  | 824.59  | 857.41  | 864.30  | 949.99  |
| 958.93  | 990.15  | 996.43  | 1001.08 | 1004.55 | 1026.84 |
| 1027.92 | 1053.57 | 1054.23 | 1108.45 | 1115.27 | 1137.57 |
| 1149.62 | 1176.02 | 1176.26 | 1201.54 | 1204.92 | 1287.23 |
| 1311.48 | 1322.51 | 1382.21 | 1385.07 | 1408.69 | 1414.22 |
| 1460.24 | 1464.98 | 1503.72 | 1506.75 | 1624.18 | 1627.00 |
| 1650.47 | 1655.27 | 3044.09 | 3131.79 | 3168.68 | 3169.30 |
| 3173.16 | 3177.82 | 3184.24 | 3193.07 | 3193.50 | 3205.88 |
| 3206.07 | 3211.29 | 3211.55 |         |         |         |

=====  
**1B**  
=====

|         |         |         |         |         |         |
|---------|---------|---------|---------|---------|---------|
| 25.85   | 35.32   | 50.86   | 96.95   | 127.21  | 159.32  |
| 174.12  | 207.59  | 242.73  | 291.03  | 380.63  | 398.75  |
| 401.72  | 419.37  | 458.44  | 483.90  | 621.62  | 623.57  |
| 654.44  | 688.40  | 701.61  | 709.29  | 710.40  | 730.25  |
| 731.55  | 757.65  | 767.64  | 850.71  | 865.95  | 866.61  |
| 892.93  | 926.50  | 929.50  | 975.18  | 977.26  | 998.69  |
| 999.58  | 1002.32 | 1005.96 | 1050.16 | 1055.82 | 1098.73 |
| 1099.73 | 1130.80 | 1140.08 | 1162.91 | 1163.04 | 1195.30 |
| 1197.06 | 1276.14 | 1314.25 | 1317.48 | 1362.06 | 1363.88 |
| 1436.92 | 1442.45 | 1459.34 | 1461.71 | 1515.20 | 1516.21 |
| 1637.68 | 1640.33 | 1663.40 | 1664.38 | 2248.91 | 3037.52 |
| 3131.96 | 3134.72 | 3140.13 | 3141.85 | 3145.90 | 3148.00 |
| 3164.49 | 3166.56 | 3172.10 | 3175.70 | 3187.63 | 3188.85 |

=====  
**2B**  
=====

|        |        |        |        |        |        |
|--------|--------|--------|--------|--------|--------|
| 56.42  | 56.94  | 74.70  | 76.86  | 77.73  | 113.44 |
| 232.98 | 235.59 | 246.04 | 287.09 | 324.64 | 325.14 |
| 408.20 | 408.86 | 428.15 | 429.01 | 471.87 | 472.74 |
| 612.54 | 613.20 | 613.67 | 626.85 | 627.72 | 665.69 |
| 690.98 | 691.56 | 711.44 | 718.12 | 776.48 | 776.78 |

813.50 854.04 854.87 857.09 932.26 933.48  
962.58 967.18 968.12 991.44 992.19 993.36  
1004.36 1004.44 1005.19 1021.35 1021.61 1022.27  
1054.33 1055.41 1055.46 1115.52 1119.60 1120.43  
1173.75 1173.84 1174.81 1193.70 1194.20 1197.50  
1224.79 1314.63 1321.14 1322.13 1380.68 1382.27  
1395.03 1410.66 1411.23 1472.05 1482.51 1483.15  
1514.45 1523.24 1523.52 1621.05 1624.18 1624.55  
1656.07 1656.78 1670.97 3190.22 3190.41 3190.56  
3194.87 3195.93 3196.49 3198.50 3198.57 3199.68  
3208.43 3208.69 3209.00 3212.95 3213.11 3213.50

=====  
**3B**  
=====

3.89 10.45 24.87 31.27 35.06 53.89  
59.21 64.59 69.36 72.41 77.53 83.86  
85.42 92.79 102.18 121.46 129.87 154.60  
177.28 212.01 235.82 236.81 241.04 247.54  
275.01 288.84 324.34 326.32 388.78 397.89  
404.49 408.22 410.68 425.27 427.75 430.34  
460.63 470.94 471.86 474.20 613.24 613.84  
614.89 622.76 624.52 627.64 627.90 658.58  
663.81 685.83 687.72 691.26 701.24 705.79  
708.17 714.98 718.52 730.87 735.40 763.36  
770.92 772.86 774.39 810.13 845.46 851.92  
854.28 856.30 865.31 872.13 900.90 925.83  
932.26 932.84 936.74 956.13 961.94 968.52  
975.35 982.21 984.88 989.28 995.37 999.77  
1002.46 1004.74 1005.22 1005.64 1008.27 1009.33  
1012.39 1015.45 1019.12 1053.78 1054.43 1054.70  
1055.97 1056.50 1096.41 1099.66 1113.92 1117.43  
1121.23 1130.41 1138.30 1164.42 1164.86 1171.09  
1171.83 1172.60 1191.02 1192.28 1193.06 1195.13  
1198.79 1223.16 1281.88 1309.27 1313.32 1314.59  
1319.65 1322.66 1360.91 1363.17 1378.47 1380.82  
1394.06 1409.04 1410.87 1432.38 1436.29 1457.06  
1461.26 1471.07 1481.57 1482.90 1512.51 1513.04  
1513.82 1521.43 1522.72 1620.52 1623.47 1626.57  
1633.69 1635.99 1655.51 1656.93 1659.47 1661.32  
1670.71 2202.18 3039.22 3123.25 3137.49 3139.27  
3143.81 3144.16 3151.86 3170.46 3170.91 3177.89  
3180.04 3185.48 3187.05 3188.31 3191.23 3193.43  
3193.53 3194.65 3195.61 3197.41 3200.17 3200.81  
3206.56 3207.98 3209.20 3210.61 3211.08 3213.08

=====  
**3B-TS**  
=====

-392.24 17.60 24.80 28.42 41.27 41.71  
50.89 63.35 66.42 68.18 78.77 85.66  
85.97 95.27 122.76 132.50 146.84 165.70  
182.64 212.64 223.66 236.53 245.31 249.44  
268.47 300.75 320.18 322.80 336.61 379.08  
391.92 399.25 406.25 408.36 426.27 444.90  
456.67 473.35 486.35 488.60 504.09 614.10  
615.15 618.68 619.89 621.32 626.41 629.10  
669.39 691.51 696.50 697.50 700.38 703.92  
709.33 710.88 732.43 742.25 751.73 754.98  
767.34 768.90 777.69 800.68 848.48 850.11  
852.62 857.78 863.06 907.35 916.50 928.41  
934.48 942.65 944.50 947.35 973.71 975.80  
978.92 981.25 981.54 983.08 986.09 1003.00  
1003.24 1007.32 1008.71 1008.91 1009.43 1010.73  
1011.23 1011.87 1013.05 1054.63 1055.33 1056.46  
1058.25 1058.91 1100.25 1104.57 1108.80 1114.59  
1116.04 1126.26 1139.87 1145.87 1167.65 1168.04  
1169.09 1169.31 1169.74 1189.88 1190.49 1194.71  
1197.01 1198.21 1280.01 1301.30 1307.16 1310.85

1311.42 1317.02 1345.07 1347.25 1365.20 1369.07  
1371.24 1391.91 1393.62 1424.00 1430.69 1444.97  
1459.66 1462.71 1473.83 1482.59 1483.86 1511.06  
1512.01 1519.35 1521.05 1545.38 1633.61 1635.50  
1636.15 1639.08 1641.75 1658.20 1659.55 1662.68  
1663.97 1683.28 3039.94 3135.53 3136.58 3144.55  
3149.47 3159.97 3165.31 3167.90 3172.47 3180.95  
3181.31 3182.27 3187.88 3189.19 3189.52 3191.03  
3191.20 3196.24 3198.13 3199.06 3200.80 3201.69  
3203.61 3205.29 3206.55 3209.43 3211.89 3214.11

=====  
**4B**  
=====

2.90 25.23 26.84 31.51 38.06 45.91  
54.06 55.68 57.47 68.59 73.09 76.60  
81.21 94.08 105.55 128.06 132.33 156.81  
162.86 221.08 227.85 236.61 245.89 246.23  
267.25 273.97 294.40 314.25 362.80 389.40  
398.07 408.85 411.28 417.64 439.75 445.77  
464.15 466.13 490.40 503.25 607.76 610.43  
614.18 614.93 621.16 624.99 627.15 664.17  
669.19 689.52 695.12 706.02 709.34 709.99  
725.43 737.79 742.02 749.08 757.71 759.85  
765.67 785.29 822.05 845.26 850.29 854.09  
855.02 857.30 864.77 877.30 883.03 925.82  
931.13 934.90 940.09 951.23 972.84 973.83  
976.19 982.07 991.17 1000.08 1000.56 1002.51  
1003.01 1004.77 1005.16 1009.38 1010.58 1017.28  
1022.84 1053.40 1054.09 1057.38 1059.91 1060.44  
1102.56 1105.02 1107.09 1108.77 1111.81 1132.91  
1146.97 1149.39 1159.24 1164.69 1165.18 1166.74  
1173.53 1173.96 1186.88 1188.85 1191.30 1196.90  
1199.15 1201.84 1264.38 1277.15 1285.37 1313.33  
1320.89 1321.81 1328.87 1333.13 1374.57 1377.97  
1380.07 1380.68 1382.28 1408.27 1414.74 1460.01  
1464.01 1476.25 1482.17 1484.19 1506.64 1507.30  
1526.00 1527.05 1527.87 1628.87 1630.91 1650.49  
1652.66 1654.77 1655.37 1657.31 1672.38 1673.54  
1677.64 2589.29 3010.28 3112.58 3137.95 3142.90  
3158.90 3159.28 3162.93 3164.15 3165.55 3172.08  
3172.53 3177.84 3180.99 3181.99 3184.73 3187.35  
3188.73 3189.54 3189.81 3192.49 3194.98 3200.88  
3201.13 3201.68 3202.09 3204.06 3207.57 3208.28

=====  
**5B**  
=====

21.99 25.45 50.30 59.91 60.26 78.62  
218.42 234.25 234.80 270.70 299.69 300.47  
408.26 408.68 413.27 474.09 499.78 501.06  
609.21 609.98 620.77 623.03 626.54 663.84  
707.68 708.30 710.10 740.52 763.22 763.91  
833.34 852.02 852.55 854.73 879.18 880.30  
924.46 925.21 926.68 967.04 967.63 968.34  
990.92 991.39 991.84 1008.76 1009.34 1009.57  
1058.44 1060.09 1060.38 1102.72 1102.93 1105.84  
1160.89 1161.21 1161.35 1187.13 1187.53 1188.89  
1199.06 1212.85 1213.66 1289.56 1290.06 1322.70  
1341.99 1342.02 1372.26 1383.33 1383.60 1479.77  
1486.18 1486.29 1530.04 1530.79 1530.80 1655.40  
1659.93 1660.18 1677.86 1677.89 1683.32 3002.76  
3153.70 3153.82 3154.10 3167.67 3167.76 3168.50  
3175.71 3175.99 3177.18 3183.30 3183.56 3184.58  
3194.20 3194.35 3194.83

=====  
**6B**  
=====

|         |         |         |         |         |         |
|---------|---------|---------|---------|---------|---------|
| 32.95   | 44.26   | 74.10   | 78.91   | 92.89   | 147.75  |
| 148.72  | 223.30  | 249.92  | 277.34  | 366.57  | 389.61  |
| 399.51  | 435.47  | 441.37  | 464.21  | 614.51  | 615.60  |
| 672.15  | 686.28  | 692.93  | 727.28  | 739.77  | 752.39  |
| 754.48  | 787.30  | 824.59  | 857.41  | 864.30  | 949.99  |
| 958.93  | 990.15  | 996.43  | 1001.08 | 1004.55 | 1026.84 |
| 1027.92 | 1053.57 | 1054.23 | 1108.45 | 1115.27 | 1137.57 |
| 1149.62 | 1176.02 | 1176.26 | 1201.54 | 1204.92 | 1287.23 |
| 1311.48 | 1322.51 | 1382.21 | 1385.07 | 1408.69 | 1414.22 |
| 1460.24 | 1464.98 | 1503.72 | 1506.75 | 1624.18 | 1627.00 |
| 1650.47 | 1655.27 | 3044.09 | 3131.79 | 3168.68 | 3169.30 |
| 3173.16 | 3177.82 | 3184.24 | 3193.07 | 3193.50 | 3205.88 |
| 3206.07 | 3211.29 | 3211.55 |         |         |         |

=====  
**7B**  
=====

|         |         |         |         |         |         |
|---------|---------|---------|---------|---------|---------|
| 2.51    | 19.37   | 31.80   | 35.50   | 40.88   | 44.29   |
| 52.95   | 57.18   | 67.57   | 76.23   | 80.51   | 108.25  |
| 127.68  | 139.40  | 143.66  | 150.99  | 171.01  | 177.67  |
| 180.87  | 190.16  | 215.70  | 221.24  | 242.46  | 243.22  |
| 282.69  | 331.87  | 359.20  | 375.37  | 395.70  | 396.00  |
| 400.85  | 406.47  | 445.20  | 450.82  | 458.67  | 459.68  |
| 469.10  | 478.13  | 619.79  | 619.98  | 620.55  | 620.66  |
| 670.46  | 671.21  | 691.00  | 702.94  | 704.94  | 705.97  |
| 710.68  | 718.31  | 719.34  | 732.03  | 748.93  | 750.66  |
| 751.11  | 757.32  | 766.85  | 770.74  | 810.16  | 818.03  |
| 858.85  | 863.49  | 865.79  | 866.41  | 870.85  | 938.14  |
| 939.37  | 941.17  | 946.56  | 962.54  | 981.85  | 984.44  |
| 985.02  | 989.62  | 1002.95 | 1003.05 | 1003.66 | 1003.82 |
| 1013.93 | 1016.54 | 1017.28 | 1017.83 | 1054.20 | 1054.86 |
| 1055.17 | 1055.76 | 1102.90 | 1103.29 | 1105.54 | 1107.23 |
| 1130.79 | 1135.01 | 1146.01 | 1147.46 | 1169.48 | 1170.70 |
| 1171.20 | 1171.21 | 1196.68 | 1197.34 | 1198.85 | 1200.26 |
| 1283.11 | 1285.81 | 1314.13 | 1315.34 | 1320.39 | 1321.88 |
| 1368.29 | 1368.58 | 1369.95 | 1370.87 | 1422.01 | 1424.32 |
| 1426.05 | 1426.57 | 1458.03 | 1458.60 | 1461.82 | 1462.79 |
| 1511.00 | 1511.46 | 1512.73 | 1512.94 | 1633.96 | 1634.47 |
| 1636.25 | 1637.31 | 1655.56 | 1656.25 | 1657.50 | 1657.83 |
| 1860.65 | 3032.07 | 3039.41 | 3126.55 | 3131.33 | 3134.73 |
| 3136.30 | 3138.72 | 3144.59 | 3148.27 | 3155.32 | 3158.24 |
| 3160.42 | 3163.80 | 3165.31 | 3179.12 | 3179.93 | 3182.68 |
| 3183.47 | 3191.47 | 3192.23 | 3192.60 | 3193.11 | 3198.66 |
| 3200.04 | 3201.38 | 3202.20 |         |         |         |

=====  
**7B-TS**  
=====

|         |         |         |         |         |         |
|---------|---------|---------|---------|---------|---------|
| -94.45  | 2.99    | 18.51   | 34.77   | 38.12   | 47.76   |
| 54.01   | 59.65   | 63.15   | 76.61   | 78.90   | 91.90   |
| 98.29   | 110.92  | 130.37  | 140.18  | 158.74  | 171.59  |
| 175.44  | 193.36  | 208.92  | 225.22  | 244.24  | 245.41  |
| 273.23  | 294.09  | 360.80  | 373.00  | 391.46  | 397.20  |
| 399.97  | 400.93  | 428.63  | 441.09  | 452.88  | 456.80  |
| 462.21  | 473.54  | 614.99  | 617.62  | 620.78  | 623.01  |
| 658.48  | 670.13  | 676.50  | 689.76  | 700.29  | 705.48  |
| 707.41  | 710.94  | 723.99  | 736.84  | 739.55  | 748.82  |
| 749.35  | 756.53  | 764.66  | 779.14  | 782.21  | 824.42  |
| 855.78  | 863.92  | 864.69  | 867.50  | 870.12  | 903.13  |
| 932.74  | 934.37  | 943.75  | 949.83  | 977.41  | 978.99  |
| 985.29  | 990.82  | 1001.32 | 1001.57 | 1003.59 | 1004.90 |
| 1008.44 | 1009.61 | 1019.64 | 1021.18 | 1053.80 | 1054.39 |
| 1054.65 | 1055.90 | 1099.68 | 1102.29 | 1105.44 | 1112.40 |
| 1130.04 | 1132.46 | 1141.97 | 1144.74 | 1167.31 | 1167.67 |
| 1173.17 | 1173.38 | 1194.31 | 1196.85 | 1199.20 | 1203.35 |
| 1281.08 | 1283.62 | 1312.08 | 1313.06 | 1317.80 | 1322.64 |

1366.57 1367.90 1373.21 1378.55 1411.58 1419.27  
1429.38 1434.34 1457.99 1458.48 1462.35 1463.43  
1506.57 1508.77 1511.21 1515.16 1628.23 1631.20  
1633.47 1639.72 1652.96 1654.96 1657.86 1663.21  
2132.75 3038.99 3040.34 3129.86 3133.20 3133.36  
3140.98 3145.53 3147.17 3148.31 3159.44 3160.22  
3163.38 3167.43 3174.16 3177.27 3182.60 3183.28  
3185.66 3187.97 3189.29 3193.76 3197.20 3197.70  
3200.05 3205.65 3206.11

=====  
**8B**  
=====

8.09 25.27 29.51 39.86 49.94 58.99  
61.89 81.96 85.79 93.51 107.83 129.15  
143.41 162.24 168.44 173.34 182.39 191.19  
193.35 213.06 228.49 233.34 245.70 256.15  
290.84 330.93 361.68 377.83 394.49 399.48  
402.83 406.30 421.25 443.47 466.01 473.48  
477.00 486.49 607.70 619.57 620.32 621.58  
639.62 673.07 676.62 701.28 702.34 704.15  
707.16 712.75 719.34 738.00 738.77 745.18  
751.97 754.07 756.65 780.83 791.67 812.31  
839.96 858.86 862.55 868.53 879.69 893.33  
931.97 934.75 941.84 976.26 978.88 987.59  
997.41 999.13 1001.56 1003.58 1004.02 1009.78  
1010.33 1012.87 1015.87 1018.67 1038.84 1052.30  
1054.88 1055.87 1057.79 1101.11 1104.47 1105.26  
1109.43 1127.68 1137.13 1140.78 1169.05 1169.74  
1169.85 1177.21 1195.87 1198.06 1200.17 1203.36  
1287.10 1288.25 1295.64 1312.21 1318.55 1319.65  
1363.66 1367.74 1369.56 1378.25 1428.72 1430.95  
1434.16 1435.41 1458.41 1460.53 1461.85 1462.28  
1481.97 1512.85 1513.68 1514.88 1607.19 1632.18  
1636.65 1638.97 1641.11 1658.41 1659.93 1660.97  
2306.74 3037.25 3039.15 3129.04 3130.53 3136.12  
3137.12 3146.29 3149.49 3152.71 3153.45 3161.13  
3162.52 3163.93 3169.56 3174.87 3179.86 3180.74  
3182.39 3183.24 3188.95 3192.45 3197.26 3199.29  
3201.49 3201.67 3206.55

=====  
**8B-TS**  
=====

-114.91 16.14 27.55 35.76 41.83 44.22  
49.48 55.55 63.70 68.92 102.89 121.09  
136.88 141.37 143.19 155.68 165.40 177.96  
183.60 212.86 215.47 221.38 236.20 244.26  
252.64 276.87 356.85 382.82 395.94 397.23  
399.57 403.75 413.20 429.22 453.58 463.00  
483.84 494.21 615.19 618.85 622.53 622.66  
638.81 659.11 678.71 687.11 697.77 705.32  
706.82 710.61 714.20 732.05 742.96 747.86  
750.66 751.72 755.52 762.06 792.49 802.87  
812.78 863.45 864.21 874.48 886.67 893.14  
930.40 941.20 943.83 961.76 976.68 983.14  
986.99 993.50 1002.38 1003.61 1004.05 1006.58  
1009.80 1012.78 1017.99 1020.92 1048.44 1053.99  
1054.09 1054.69 1086.15 1099.75 1104.51 1106.14  
1111.95 1130.92 1137.39 1141.23 1167.51 1168.60  
1171.24 1171.63 1195.04 1196.48 1197.48 1200.53  
1281.08 1285.72 1302.29 1313.85 1316.25 1318.30  
1361.07 1362.88 1372.68 1378.52 1414.39 1420.38  
1431.59 1439.53 1445.80 1458.15 1459.82 1461.64  
1496.71 1510.93 1511.85 1513.69 1609.80 1632.89  
1633.53 1634.46 1643.48 1655.75 1656.89 1658.53  
2356.53 3035.21 3035.92 3129.26 3129.51 3133.11  
3133.43 3137.17 3143.12 3148.38 3149.18 3150.82  
3152.25 3156.91 3168.32 3174.69 3180.19 3181.57

3187.24 3188.12 3190.31 3193.45 3196.98 3198.17  
3200.97 3205.81 3206.97

## =====

**9B**

=====

2.95 14.07 25.79 36.09 39.59 49.60  
60.49 66.69 74.25 83.84 92.19 125.52  
141.41 153.25 157.36 170.25 175.44 180.73  
187.93 216.00 229.47 234.03 245.18 254.70  
292.45 317.62 362.44 395.63 397.71 399.17  
403.28 407.00 435.02 449.41 460.99 466.90  
493.43 498.42 615.70 619.68 622.73 623.50  
656.32 664.16 680.94 694.74 703.77 706.85  
707.77 712.58 717.78 740.41 745.45 750.71  
752.09 752.62 758.21 771.60 792.94 802.90  
830.97 864.43 865.30 873.99 890.01 908.15  
933.56 938.83 940.47 949.66 979.87 984.64  
987.70 992.61 1002.68 1003.29 1004.07 1011.21  
1012.87 1017.90 1020.57 1032.38 1050.47 1054.31  
1056.59 1057.49 1075.13 1099.57 1101.32 1105.39  
1105.96 1132.06 1139.15 1141.32 1168.33 1168.81  
1171.03 1171.89 1189.85 1197.49 1198.13 1201.51  
1282.19 1289.94 1299.24 1313.27 1319.24 1319.42  
1364.09 1366.08 1367.74 1389.19 1424.15 1428.18  
1434.07 1436.87 1439.04 1457.60 1461.16 1461.39  
1490.41 1512.81 1514.63 1515.71 1594.20 1635.29  
1635.95 1637.78 1639.22 1654.77 1659.59 1660.12  
2344.60 3038.00 3041.99 3060.74 3125.10 3130.14  
3133.18 3135.53 3139.96 3144.66 3146.36 3150.11  
3158.06 3163.48 3164.99 3178.73 3181.56 3181.65  
3182.94 3187.65 3189.60 3189.87 3191.11 3198.59  
3200.21 3201.30 3209.22

## =====

**9B-TS**

=====

-74.47 4.90 19.55 27.06 32.22 38.85  
41.11 48.55 54.57 68.13 82.44 86.97  
103.73 120.94 134.52 136.29 144.09 154.91  
170.11 208.24 216.74 220.64 232.80 245.13  
248.53 284.96 344.75 387.84 396.19 397.56  
400.58 402.27 431.86 434.83 445.62 477.87  
484.39 489.16 554.12 612.00 620.50 623.08  
624.01 660.54 677.42 685.50 691.92 706.04  
707.47 708.10 710.55 713.84 735.89 736.83  
746.15 750.16 750.70 765.07 768.45 792.41  
823.60 850.69 862.28 864.65 870.92 898.45  
928.52 932.12 936.82 944.70 976.89 978.03  
981.87 983.76 1000.49 1000.90 1004.12 1004.48  
1008.00 1008.56 1008.88 1022.87 1049.49 1052.88  
1055.92 1056.61 1097.73 1100.63 1101.76 1110.74  
1125.28 1135.03 1140.59 1146.08 1164.50 1166.62  
1167.01 1174.58 1194.67 1195.39 1197.16 1200.28  
1219.80 1288.44 1310.15 1314.22 1316.20 1317.57  
1363.17 1364.12 1364.65 1383.57 1404.71 1413.05  
1435.05 1443.66 1455.69 1459.58 1459.68 1460.36  
1501.64 1508.20 1513.67 1514.87 1619.24 1626.79  
1637.05 1638.29 1648.40 1654.03 1660.63 1661.11  
2375.50 2983.99 3040.26 3080.32 3115.12 3122.69  
3133.64 3134.00 3140.24 3157.89 3160.21 3163.23  
3170.57 3171.94 3172.24 3172.59 3178.61 3179.21  
3183.09 3188.21 3188.59 3188.76 3192.59 3199.25  
3199.77 3201.44 3207.25

=====  
**10B**  
=====

|         |         |         |         |         |         |
|---------|---------|---------|---------|---------|---------|
| 9.34    | 22.62   | 28.53   | 36.23   | 38.25   | 41.10   |
| 44.39   | 51.93   | 55.73   | 61.70   | 76.56   | 108.94  |
| 117.61  | 136.55  | 139.34  | 166.17  | 171.72  | 183.03  |
| 202.76  | 215.66  | 234.51  | 243.98  | 249.00  | 250.92  |
| 287.33  | 307.24  | 322.62  | 393.45  | 395.58  | 396.25  |
| 400.37  | 402.52  | 442.79  | 446.31  | 455.44  | 466.15  |
| 503.28  | 504.85  | 543.29  | 619.00  | 620.14  | 620.81  |
| 621.78  | 661.78  | 681.35  | 692.16  | 701.63  | 704.18  |
| 705.36  | 707.40  | 721.77  | 730.91  | 734.24  | 741.84  |
| 747.07  | 749.82  | 751.21  | 753.23  | 780.19  | 833.34  |
| 860.64  | 861.65  | 863.23  | 868.28  | 889.09  | 929.71  |
| 936.42  | 939.44  | 944.32  | 973.00  | 977.76  | 982.84  |
| 984.35  | 987.68  | 1001.94 | 1002.90 | 1003.23 | 1004.17 |
| 1010.85 | 1013.07 | 1017.22 | 1017.80 | 1047.44 | 1054.50 |
| 1054.92 | 1056.52 | 1058.03 | 1103.56 | 1104.48 | 1107.38 |
| 1107.85 | 1126.03 | 1140.69 | 1144.39 | 1146.05 | 1168.95 |
| 1170.24 | 1171.47 | 1171.58 | 1196.89 | 1198.71 | 1198.81 |
| 1201.44 | 1294.97 | 1312.99 | 1317.31 | 1318.41 | 1319.28 |
| 1332.20 | 1368.14 | 1370.34 | 1371.47 | 1372.04 | 1374.01 |
| 1425.33 | 1431.51 | 1458.41 | 1461.53 | 1462.65 | 1463.41 |
| 1512.21 | 1513.62 | 1513.92 | 1514.81 | 1636.11 | 1638.20 |
| 1638.57 | 1639.49 | 1659.35 | 1659.58 | 1660.05 | 1661.16 |
| 2325.94 | 3015.98 | 3042.32 | 3117.96 | 3122.79 | 3135.90 |
| 3137.16 | 3144.30 | 3149.49 | 3157.60 | 3165.89 | 3167.18 |
| 3169.52 | 3180.02 | 3183.60 | 3186.05 | 3186.40 | 3190.68 |
| 3194.04 | 3195.68 | 3196.18 | 3196.63 | 3199.69 | 3202.81 |
| 3204.95 | 3205.19 | 3218.64 |         |         |         |

=====  
**10B-TS**  
=====

|         |         |         |         |         |         |
|---------|---------|---------|---------|---------|---------|
| -52.52  | 4.78    | 7.20    | 14.29   | 26.85   | 32.47   |
| 40.05   | 48.04   | 53.50   | 62.97   | 65.58   | 78.12   |
| 96.52   | 97.26   | 138.61  | 150.69  | 159.22  | 159.64  |
| 167.08  | 179.51  | 185.66  | 234.08  | 243.70  | 251.13  |
| 253.44  | 287.65  | 307.74  | 383.19  | 394.73  | 397.26  |
| 397.98  | 407.76  | 430.55  | 432.38  | 462.25  | 464.28  |
| 498.15  | 505.69  | 581.92  | 615.63  | 617.46  | 618.24  |
| 623.89  | 641.33  | 682.55  | 688.15  | 691.93  | 697.75  |
| 700.10  | 705.62  | 711.09  | 721.36  | 744.12  | 744.91  |
| 745.77  | 749.76  | 753.71  | 758.53  | 774.77  | 843.29  |
| 862.68  | 863.90  | 864.25  | 871.24  | 886.16  | 900.45  |
| 927.89  | 948.39  | 957.94  | 960.66  | 974.75  | 990.69  |
| 992.27  | 996.52  | 1001.42 | 1001.69 | 1004.10 | 1005.55 |
| 1006.91 | 1022.80 | 1023.56 | 1024.19 | 1053.60 | 1054.29 |
| 1055.30 | 1056.84 | 1100.76 | 1103.62 | 1110.97 | 1111.52 |
| 1123.26 | 1142.95 | 1144.67 | 1146.39 | 1166.88 | 1173.90 |
| 1174.09 | 1174.23 | 1195.79 | 1199.98 | 1201.09 | 1205.29 |
| 1260.74 | 1282.53 | 1309.50 | 1316.19 | 1319.71 | 1320.78 |
| 1365.10 | 1375.77 | 1377.91 | 1379.41 | 1425.99 | 1434.23 |
| 1437.65 | 1443.34 | 1457.24 | 1461.56 | 1462.66 | 1463.59 |
| 1504.83 | 1506.20 | 1507.67 | 1516.48 | 1625.65 | 1628.50 |
| 1630.10 | 1640.65 | 1651.85 | 1653.27 | 1656.06 | 1663.81 |
| 2257.25 | 3013.60 | 3032.62 | 3105.55 | 3109.15 | 3123.41 |
| 3133.08 | 3135.92 | 3144.65 | 3167.71 | 3169.47 | 3173.82 |
| 3174.63 | 3175.24 | 3177.20 | 3182.34 | 3183.91 | 3190.07 |
| 3190.58 | 3190.75 | 3195.58 | 3201.29 | 3202.08 | 3202.37 |
| 3207.66 | 3208.66 | 3208.86 |         |         |         |

=====  
**11B**  
=====

|        |        |        |        |        |        |
|--------|--------|--------|--------|--------|--------|
| 8.00   | 19.72  | 36.15  | 45.95  | 57.70  | 67.50  |
| 72.92  | 110.20 | 119.24 | 134.55 | 138.95 | 140.86 |
| 143.96 | 163.49 | 167.43 | 181.14 | 194.91 | 202.71 |
| 215.13 | 233.32 | 245.85 | 320.81 | 367.37 | 395.02 |



402.08 453.69 456.69 466.10 611.68 619.53  
620.43 642.39 671.73 673.20 683.57 701.58  
706.16 719.22 732.39 747.70 749.80 755.79  
758.37 776.04 812.09 839.51 856.21 863.76  
869.37 877.20 896.28 940.01 947.70 984.51  
990.74 991.91 1003.39 1004.80 1018.53 1020.88  
1055.37 1055.76 1103.59 1107.48 1134.32 1147.52  
1172.15 1172.46 1196.99 1199.48 1285.26 1286.06  
1287.12 1293.35 1313.75 1320.96 1371.77 1373.76  
1412.57 1415.26 1418.52 1421.87 1423.47 1427.02  
1429.68 1437.10 1459.69 1463.96 1511.74 1512.84  
1635.37 1637.89 1656.94 1658.45 1886.24 3039.41  
3040.87 3042.54 3043.20 3133.78 3135.81 3136.75  
3137.16 3140.20 3143.46 3148.84 3150.51 3153.32  
3157.01 3162.93 3166.94 3187.82 3188.14 3197.79  
3198.52 3206.20 3206.42

=====  
**12B Me2PhSi+**  
=====

81.77 109.88 132.62 229.86 279.93 306.08  
348.19 388.18 391.50 428.38 515.00 612.19  
648.87 679.04 751.83 753.60 768.89 784.71  
853.41 862.27 884.12 944.80 954.94 991.08  
1001.92 1029.87 1051.92 1115.00 1150.42 1177.72  
1203.59 1310.00 1324.00 1352.78 1390.20 1420.22  
1425.67 1445.34 1445.98 1463.65 1503.85 1621.80  
1651.79 2720.91 2829.99 2885.01 2904.70 2995.17  
3046.45 3172.12 3176.98 3193.31 3208.10 3212.54

=====  
**12B Ph3SiH**  
=====

13.09 31.67 35.61 45.99 57.49 58.06  
151.74 158.40 176.32 219.34 235.12 251.43  
394.13 395.99 400.63 402.21 421.11 430.71  
478.61 491.98 501.22 623.62 624.15 625.18  
686.88 702.58 706.78 709.69 711.37 711.66  
741.54 743.06 754.38 813.81 829.89 863.37  
867.11 867.96 923.99 928.92 933.46 973.23  
976.69 979.93 998.14 998.92 1000.01 1004.87  
1005.00 1005.54 1055.45 1055.80 1056.76 1097.41  
1099.81 1101.06 1131.27 1138.58 1140.56 1163.11  
1163.25 1163.34 1194.43 1195.70 1198.14 1312.56  
1317.11 1317.67 1361.50 1364.29 1364.77 1458.91  
1461.90 1462.90 1514.59 1515.12 1516.39 1637.99  
1640.22 1640.40 1663.61 1664.02 1664.55 2249.71  
3136.36 3140.80 3146.44 3146.89 3149.27 3151.30  
3166.55 3166.93 3168.09 3174.57 3175.23 3177.26  
3189.05 3189.34 3189.86

=====  
**13B Ph3Si+**  
=====

23.91 30.26 43.33 51.72 59.30 96.29  
142.55 147.18 161.86 236.90 243.79 251.46  
327.51 392.48 392.94 402.06 428.24 435.88  
463.48 497.51 506.72 613.85 616.38 617.81  
681.14 686.89 693.41 704.51 741.66 741.94  
752.39 754.81 755.24 858.75 863.12 869.83  
943.83 955.50 962.76 989.31 992.31 996.89  
1000.56 1001.93 1005.58 1021.66 1025.53 1026.63  
1052.93 1055.29 1055.95 1101.94 1109.96 1118.75  
1122.88 1142.14 1145.64 1174.39 1174.97 1175.78  
1201.25 1201.42 1209.94 1306.66 1319.42 1323.17  
1369.06 1380.73 1384.41 1455.73 1461.72 1464.78  
1502.39 1506.99 1509.75 1623.18 1627.19 1632.57  
1650.60 1654.14 1656.47 3158.71 3159.82 3179.64  
3180.90 3187.98 3191.69 3191.83 3194.12 3199.93

3201.85 3205.70 3207.29 3209.41 3211.41 3212.87

=====  
**13B PhMe2SiH**  
=====

29.05 83.74 131.57 145.02 152.73 177.02  
230.75 287.20 380.94 398.96 466.82 602.96  
624.44 648.02 693.84 705.08 710.71 728.17  
737.73 778.27 852.55 864.06 899.77 901.39  
924.73 973.17 997.55 1006.30 1056.48 1098.69  
1139.87 1162.53 1195.40 1275.82 1280.78 1316.18  
1364.74 1434.03 1436.75 1443.45 1447.96 1461.09  
1517.15 1641.94 1665.60 2253.18 3036.55 3037.69  
3128.31 3129.49 3134.41 3143.43 3144.23 3151.49  
3168.38 3178.74 3190.75

=====  
**14B**  
=====

10.62 20.24 36.76 43.20 46.19 55.85  
59.23 75.67 82.04 113.56 132.73 137.12  
146.21 149.69 158.90 167.19 174.51 178.57  
190.71 217.84 240.56 262.32 285.55 337.83  
361.69 384.39 392.82 395.54 398.51 450.34  
454.17 459.66 467.53 619.26 619.80 619.94  
640.35 643.76 672.64 698.88 699.59 701.71  
716.21 721.51 722.34 732.13 740.82 744.39  
753.50 764.00 772.24 799.73 814.99 837.17  
858.48 861.14 866.99 873.47 922.05 934.55  
937.04 943.41 977.56 979.04 986.59 1003.44  
1003.75 1004.14 1012.66 1013.68 1017.87 1054.48  
1054.58 1056.25 1104.35 1105.29 1106.67 1136.76  
1142.48 1152.37 1170.23 1170.82 1171.73 1196.25  
1197.09 1198.33 1284.93 1288.24 1294.16 1315.74  
1317.54 1320.54 1370.16 1373.62 1375.82 1414.72  
1420.74 1421.49 1425.74 1427.79 1431.73 1460.84  
1461.52 1464.40 1512.60 1513.07 1514.38 1636.80  
1637.87 1639.69 1657.75 1659.89 1660.60 1916.66  
3029.95 3036.79 3038.17 3118.89 3127.42 3130.58  
3135.51 3137.75 3140.58 3140.89 3144.91 3153.44  
3160.97 3162.04 3163.59 3182.08 3185.86 3186.85  
3194.36 3196.31 3197.30 3201.73 3204.75 3205.64

=====  
**14B-TS**  
=====

-108.64 23.01 29.17 41.33 43.36 54.08  
82.17 90.09 94.33 108.85 119.24 128.35  
153.06 159.85 176.36 180.64 188.06 204.18  
207.75 238.10 242.38 250.47 270.44 280.02  
359.59 367.59 389.79 395.03 403.11 440.70  
443.50 464.77 472.11 609.29 617.18 617.62  
620.08 647.85 669.04 677.79 685.56 697.76  
704.87 706.74 717.16 735.90 740.83 749.90  
751.55 758.32 780.54 791.75 820.62 855.44  
858.33 867.38 883.93 898.86 903.37 938.40  
942.72 949.60 982.72 989.60 991.43 1001.54  
1003.85 1007.08 1017.79 1019.64 1021.36 1049.64  
1053.60 1056.11 1089.26 1104.93 1111.98 1113.31  
1127.77 1139.25 1171.14 1171.67 1172.47 1196.55  
1198.72 1203.88 1280.53 1283.97 1291.79 1307.61  
1312.76 1322.49 1370.14 1371.81 1373.91 1416.34  
1427.48 1430.42 1432.45 1438.67 1443.18 1446.47  
1458.88 1463.37 1500.79 1510.64 1512.34 1613.06  
1633.79 1636.56 1645.06 1656.00 1657.30 2266.83  
3038.54 3041.43 3045.59 3136.34 3138.09 3138.75  
3143.53 3144.37 3153.28 3164.60 3167.41 3169.41  
3170.42 3171.66 3182.09 3186.99 3189.07 3189.47  
3191.75 3198.52 3199.31 3206.22 3206.68 3207.50

=====  
**15B**  
=====

|         |         |         |         |         |         |
|---------|---------|---------|---------|---------|---------|
| 18.35   | 22.54   | 39.01   | 49.54   | 54.28   | 66.35   |
| 74.02   | 87.63   | 120.63  | 138.16  | 153.14  | 158.97  |
| 166.77  | 179.58  | 180.27  | 198.92  | 208.71  | 224.16  |
| 232.93  | 238.10  | 245.70  | 263.19  | 269.58  | 328.30  |
| 353.28  | 383.97  | 396.39  | 398.07  | 400.10  | 438.13  |
| 474.78  | 481.21  | 492.40  | 606.90  | 621.90  | 622.55  |
| 623.70  | 636.56  | 669.43  | 678.11  | 699.41  | 704.19  |
| 706.71  | 709.56  | 714.40  | 723.48  | 738.52  | 747.26  |
| 751.26  | 775.64  | 785.13  | 790.13  | 810.98  | 859.08  |
| 860.94  | 864.16  | 875.85  | 878.71  | 912.04  | 933.20  |
| 939.12  | 978.85  | 981.93  | 995.56  | 999.22  | 1003.36 |
| 1003.98 | 1010.31 | 1012.00 | 1013.54 | 1013.71 | 1037.72 |
| 1054.05 | 1057.80 | 1058.68 | 1102.70 | 1104.18 | 1107.73 |
| 1131.55 | 1138.15 | 1169.85 | 1170.08 | 1176.04 | 1198.28 |
| 1198.96 | 1201.64 | 1285.22 | 1287.44 | 1293.59 | 1299.84 |
| 1314.42 | 1319.58 | 1367.52 | 1369.07 | 1377.26 | 1421.72 |
| 1425.23 | 1431.66 | 1436.09 | 1438.82 | 1445.36 | 1457.65 |
| 1459.76 | 1462.36 | 1481.72 | 1514.08 | 1516.00 | 1604.97 |
| 1637.61 | 1639.58 | 1641.05 | 1659.60 | 1661.41 | 2322.25 |
| 3040.77 | 3043.34 | 3045.67 | 3128.58 | 3133.29 | 3136.16 |
| 3149.37 | 3149.60 | 3152.05 | 3154.26 | 3155.79 | 3160.29 |
| 3161.82 | 3166.72 | 3167.62 | 3183.53 | 3184.09 | 3189.48 |
| 3192.69 | 3193.69 | 3202.99 | 3203.23 | 3205.08 | 3209.90 |

=====  
**15B-TS**  
=====

|         |         |         |         |         |         |
|---------|---------|---------|---------|---------|---------|
| -164.07 | 26.38   | 32.29   | 45.90   | 49.05   | 60.86   |
| 65.29   | 76.10   | 115.96  | 129.74  | 139.99  | 141.46  |
| 181.84  | 186.41  | 199.04  | 200.03  | 211.52  | 215.22  |
| 217.29  | 227.50  | 232.82  | 245.39  | 248.90  | 289.84  |
| 346.53  | 390.95  | 396.39  | 403.17  | 412.04  | 427.86  |
| 465.21  | 476.87  | 497.30  | 613.06  | 622.17  | 622.77  |
| 628.70  | 652.87  | 661.81  | 674.35  | 679.34  | 698.72  |
| 703.10  | 710.07  | 713.17  | 717.03  | 737.65  | 746.20  |
| 750.81  | 758.21  | 785.31  | 787.83  | 803.30  | 861.37  |
| 864.07  | 870.66  | 878.21  | 886.70  | 906.74  | 933.57  |
| 939.55  | 969.90  | 980.44  | 985.21  | 997.18  | 1003.06 |
| 1003.49 | 1005.42 | 1011.19 | 1014.43 | 1029.70 | 1044.76 |
| 1056.35 | 1056.61 | 1082.92 | 1098.85 | 1101.45 | 1104.19 |
| 1132.22 | 1140.22 | 1168.49 | 1169.25 | 1175.06 | 1195.41 |
| 1197.46 | 1199.90 | 1280.94 | 1284.19 | 1287.93 | 1300.83 |
| 1313.25 | 1318.70 | 1364.89 | 1366.91 | 1382.47 | 1413.67 |
| 1417.24 | 1426.80 | 1433.34 | 1434.65 | 1435.81 | 1443.98 |
| 1458.31 | 1462.25 | 1490.41 | 1514.11 | 1514.77 | 1607.81 |
| 1636.79 | 1638.62 | 1647.51 | 1660.23 | 1660.87 | 2361.42 |
| 3036.27 | 3037.52 | 3039.49 | 3122.32 | 3131.54 | 3132.26 |
| 3132.29 | 3133.98 | 3137.97 | 3148.16 | 3154.13 | 3157.65 |
| 3159.01 | 3161.35 | 3174.14 | 3182.56 | 3183.36 | 3190.30 |
| 3191.54 | 3192.17 | 3198.30 | 3202.51 | 3202.67 | 3207.99 |

=====  
**16B**  
=====

|         |         |         |         |         |         |
|---------|---------|---------|---------|---------|---------|
| 10.27   | 14.93   | 37.52   | 43.14   | 52.52   | 70.49   |
| 78.40   | 92.96   | 119.08  | 125.08  | 147.93  | 161.25  |
| 163.74  | 167.29  | 181.67  | 188.03  | 204.91  | 216.84  |
| 229.16  | 232.25  | 238.76  | 246.55  | 254.90  | 324.69  |
| 364.25  | 395.97  | 401.58  | 404.49  | 437.52  | 447.30  |
| 467.34  | 494.16  | 500.74  | 613.59  | 616.58  | 622.50  |
| 623.32  | 658.06  | 664.69  | 681.45  | 694.15  | 704.74  |
| 706.79  | 708.45  | 716.92  | 720.26  | 742.14  | 749.97  |
| 751.39  | 775.07  | 780.76  | 793.15  | 800.85  | 860.03  |
| 863.12  | 867.33  | 875.74  | 900.04  | 912.49  | 933.10  |
| 938.34  | 952.98  | 978.83  | 987.91  | 994.73  | 1003.53 |
| 1003.91 | 1011.33 | 1013.17 | 1020.69 | 1033.78 | 1049.59 |

|         |         |         |         |         |         |
|---------|---------|---------|---------|---------|---------|
| 1056.83 | 1058.29 | 1078.22 | 1099.28 | 1101.21 | 1106.78 |
| 1132.67 | 1141.84 | 1169.07 | 1169.34 | 1175.39 | 1191.76 |
| 1197.50 | 1201.13 | 1280.71 | 1290.04 | 1295.15 | 1303.41 |
| 1313.97 | 1319.38 | 1365.95 | 1368.65 | 1385.75 | 1406.39 |
| 1415.33 | 1430.08 | 1432.46 | 1433.95 | 1435.83 | 1437.99 |
| 1459.35 | 1462.29 | 1491.31 | 1514.94 | 1516.08 | 1593.58 |
| 1637.37 | 1638.08 | 1639.95 | 1661.00 | 1661.78 | 2334.84 |
| 3041.03 | 3041.52 | 3042.35 | 3081.17 | 3128.02 | 3130.82 |
| 3134.12 | 3135.36 | 3141.36 | 3151.53 | 3153.60 | 3159.73 |
| 3159.84 | 3168.21 | 3180.25 | 3183.40 | 3183.67 | 3189.39 |
| 3192.22 | 3192.38 | 3192.97 | 3202.96 | 3203.36 | 3213.94 |

=====  
**16B-TS**  
=====

|         |         |         |         |         |         |
|---------|---------|---------|---------|---------|---------|
| -100.67 | 8.89    | 12.59   | 31.81   | 40.80   | 41.50   |
| 47.47   | 62.75   | 68.44   | 72.84   | 75.28   | 95.44   |
| 109.30  | 140.58  | 148.69  | 162.73  | 167.65  | 190.57  |
| 203.21  | 216.05  | 223.60  | 237.78  | 240.67  | 248.79  |
| 358.85  | 395.19  | 398.78  | 401.46  | 422.65  | 445.66  |
| 469.38  | 485.06  | 497.84  | 512.51  | 621.69  | 622.42  |
| 622.67  | 628.56  | 654.82  | 662.71  | 671.93  | 678.73  |
| 706.84  | 707.43  | 710.42  | 711.92  | 716.05  | 736.38  |
| 747.38  | 756.77  | 766.77  | 790.72  | 815.92  | 831.80  |
| 864.45  | 869.79  | 871.78  | 877.79  | 921.88  | 931.17  |
| 932.55  | 946.95  | 978.06  | 984.30  | 990.12  | 1001.27 |
| 1002.62 | 1004.58 | 1010.10 | 1013.86 | 1015.97 | 1051.58 |
| 1053.29 | 1056.89 | 1098.23 | 1102.86 | 1106.18 | 1124.99 |
| 1135.76 | 1143.94 | 1167.87 | 1168.60 | 1168.76 | 1194.11 |
| 1195.81 | 1198.76 | 1204.18 | 1278.37 | 1289.83 | 1310.79 |
| 1312.78 | 1317.73 | 1356.25 | 1365.74 | 1367.63 | 1382.87 |
| 1386.88 | 1403.65 | 1411.95 | 1418.79 | 1438.91 | 1456.42 |
| 1460.22 | 1461.99 | 1508.25 | 1511.72 | 1516.11 | 1624.70 |
| 1628.84 | 1639.83 | 1654.00 | 1658.12 | 1663.30 | 2383.81 |
| 2942.53 | 3017.36 | 3037.24 | 3063.90 | 3086.36 | 3120.50 |
| 3125.86 | 3130.69 | 3133.18 | 3138.41 | 3146.59 | 3147.45 |
| 3147.73 | 3156.27 | 3159.10 | 3169.87 | 3171.63 | 3180.07 |
| 3182.66 | 3188.35 | 3193.27 | 3193.91 | 3199.25 | 3199.86 |

=====  
**17B**  
=====

|         |         |         |         |         |         |
|---------|---------|---------|---------|---------|---------|
| 12.88   | 19.38   | 23.06   | 30.71   | 31.94   | 41.27   |
| 49.74   | 53.00   | 61.04   | 102.19  | 106.10  | 129.97  |
| 143.33  | 154.10  | 167.56  | 183.89  | 191.58  | 201.47  |
| 218.24  | 235.81  | 246.77  | 250.49  | 266.94  | 272.13  |
| 308.92  | 394.40  | 394.56  | 401.36  | 443.46  | 445.17  |
| 458.72  | 504.02  | 505.51  | 561.32  | 615.92  | 619.98  |
| 620.99  | 621.10  | 658.89  | 683.14  | 688.19  | 701.71  |
| 704.35  | 704.90  | 707.08  | 733.51  | 735.53  | 748.12  |
| 750.71  | 751.84  | 765.10  | 804.68  | 858.83  | 861.67  |
| 863.02  | 867.43  | 885.55  | 900.36  | 937.58  | 939.73  |
| 944.21  | 982.23  | 983.61  | 984.29  | 987.46  | 1002.63 |
| 1003.04 | 1003.26 | 1017.20 | 1017.68 | 1017.97 | 1018.68 |
| 1055.22 | 1056.59 | 1056.85 | 1103.86 | 1107.26 | 1107.93 |
| 1126.56 | 1145.85 | 1146.44 | 1171.74 | 1171.81 | 1171.96 |
| 1198.62 | 1198.68 | 1201.21 | 1293.61 | 1298.32 | 1313.03 |
| 1318.37 | 1319.41 | 1359.07 | 1370.51 | 1372.39 | 1372.84 |
| 1380.49 | 1421.97 | 1429.00 | 1433.74 | 1439.42 | 1458.81 |
| 1462.98 | 1463.54 | 1511.89 | 1513.29 | 1513.77 | 1636.03 |
| 1638.16 | 1638.34 | 1658.99 | 1659.23 | 1659.52 | 2326.42 |
| 3017.45 | 3040.84 | 3042.19 | 3132.14 | 3135.55 | 3136.49 |
| 3136.67 | 3146.99 | 3147.09 | 3148.45 | 3165.49 | 3167.00 |
| 3169.76 | 3186.52 | 3187.10 | 3187.22 | 3193.59 | 3196.80 |
| 3197.00 | 3197.05 | 3205.11 | 3205.77 | 3205.94 | 3209.55 |

=====  
**17B-TS**  
=====

|         |         |         |         |         |         |
|---------|---------|---------|---------|---------|---------|
| -44.04  | 5.44    | 23.83   | 37.86   | 39.77   | 42.38   |
| 51.67   | 55.66   | 60.52   | 72.73   | 79.93   | 95.85   |
| 156.92  | 159.33  | 160.62  | 192.03  | 194.99  | 201.45  |
| 209.41  | 225.30  | 234.87  | 242.54  | 252.06  | 252.96  |
| 309.12  | 394.81  | 395.50  | 406.57  | 429.24  | 430.91  |
| 462.76  | 502.04  | 503.62  | 591.33  | 614.14  | 615.60  |
| 617.25  | 617.49  | 619.98  | 670.40  | 683.87  | 691.15  |
| 697.46  | 697.90  | 698.38  | 716.20  | 746.42  | 746.84  |
| 748.93  | 755.34  | 756.60  | 844.38  | 848.17  | 861.41  |
| 862.62  | 870.13  | 871.88  | 923.83  | 927.29  | 946.89  |
| 955.23  | 959.54  | 990.50  | 990.70  | 995.96  | 1001.77 |
| 1002.01 | 1003.51 | 1021.99 | 1023.28 | 1023.73 | 1054.31 |
| 1054.73 | 1055.49 | 1103.88 | 1109.96 | 1112.31 | 1125.83 |
| 1148.36 | 1148.65 | 1173.66 | 1173.90 | 1174.25 | 1199.48 |
| 1200.46 | 1204.48 | 1274.25 | 1287.18 | 1295.39 | 1310.74 |
| 1319.70 | 1321.74 | 1376.90 | 1379.36 | 1383.39 | 1429.06 |
| 1433.10 | 1435.48 | 1446.36 | 1449.42 | 1451.17 | 1457.93 |
| 1463.13 | 1464.29 | 1505.90 | 1506.24 | 1506.86 | 1626.62 |
| 1629.17 | 1630.46 | 1652.67 | 1654.16 | 1657.57 | 2209.24 |
| 3005.45 | 3006.71 | 3018.26 | 3090.18 | 3093.06 | 3104.64 |
| 3108.45 | 3121.27 | 3131.73 | 3161.01 | 3165.35 | 3167.34 |
| 3173.18 | 3173.56 | 3178.06 | 3190.39 | 3193.80 | 3194.35 |
| 3201.94 | 3203.17 | 3206.66 | 3209.87 | 3212.11 | 3216.35 |

=====  
**18B**  
=====

|         |         |         |         |         |         |
|---------|---------|---------|---------|---------|---------|
| 11.30   | 24.13   | 29.86   | 36.00   | 38.43   | 47.48   |
| 55.26   | 64.01   | 78.77   | 116.43  | 123.66  | 136.06  |
| 146.48  | 153.56  | 159.63  | 175.26  | 180.42  | 183.90  |
| 197.34  | 208.00  | 224.58  | 237.80  | 245.77  | 255.20  |
| 362.40  | 392.75  | 397.10  | 405.40  | 433.21  | 443.48  |
| 479.91  | 499.29  | 503.94  | 612.75  | 619.48  | 621.05  |
| 621.67  | 655.64  | 679.36  | 682.61  | 686.38  | 702.02  |
| 703.59  | 708.10  | 733.56  | 734.58  | 747.62  | 749.11  |
| 752.68  | 753.88  | 757.25  | 841.96  | 855.70  | 860.13  |
| 863.74  | 874.78  | 877.58  | 897.10  | 934.06  | 939.65  |
| 955.91  | 980.49  | 984.94  | 996.15  | 1001.89 | 1003.03 |
| 1003.56 | 1014.47 | 1015.44 | 1017.57 | 1021.13 | 1055.64 |
| 1055.92 | 1057.45 | 1101.60 | 1106.76 | 1108.34 | 1125.57 |
| 1145.03 | 1146.75 | 1171.74 | 1171.86 | 1172.11 | 1196.93 |
| 1198.88 | 1201.72 | 1285.55 | 1286.44 | 1292.39 | 1311.81 |
| 1317.76 | 1321.08 | 1369.12 | 1372.23 | 1374.06 | 1412.99 |
| 1416.21 | 1418.79 | 1426.89 | 1429.71 | 1437.19 | 1458.03 |
| 1461.18 | 1464.37 | 1510.43 | 1512.55 | 1513.92 | 1634.15 |
| 1637.99 | 1638.15 | 1656.73 | 1658.60 | 1659.88 | 1890.28 |
| 3036.94 | 3040.45 | 3041.15 | 3133.93 | 3135.49 | 3136.74 |
| 3136.96 | 3142.02 | 3144.96 | 3148.26 | 3149.65 | 3152.78 |
| 3160.63 | 3166.02 | 3169.39 | 3187.01 | 3187.11 | 3187.26 |
| 3196.70 | 3197.16 | 3197.37 | 3205.35 | 3205.65 | 3205.96 |

=====  
**19B Me3Si+**  
=====

|         |         |         |         |         |         |
|---------|---------|---------|---------|---------|---------|
| 29.95   | 35.06   | 66.20   | 198.48  | 199.16  | 211.54  |
| 606.76  | 632.77  | 635.35  | 699.57  | 757.78  | 759.49  |
| 835.87  | 902.00  | 902.54  | 1283.50 | 1283.75 | 1288.76 |
| 1391.78 | 1391.88 | 1393.79 | 1394.58 | 1400.83 | 1401.85 |
| 3028.54 | 3028.98 | 3032.11 | 3110.78 | 3111.84 | 3112.05 |
| 3166.21 | 3166.77 | 3167.63 |         |         |         |

=====  
**19B Ph3SiH**  
=====

|         |         |         |         |         |         |
|---------|---------|---------|---------|---------|---------|
| 13.09   | 31.67   | 35.61   | 45.99   | 57.49   | 58.06   |
| 151.74  | 158.40  | 176.32  | 219.34  | 235.12  | 251.43  |
| 394.13  | 395.99  | 400.63  | 402.21  | 421.11  | 430.71  |
| 478.61  | 491.98  | 501.22  | 623.62  | 624.15  | 625.18  |
| 686.88  | 702.58  | 706.78  | 709.69  | 711.37  | 711.66  |
| 741.54  | 743.06  | 754.38  | 813.81  | 829.89  | 863.37  |
| 867.11  | 867.96  | 923.99  | 928.92  | 933.46  | 973.23  |
| 976.69  | 979.93  | 998.14  | 998.92  | 1000.01 | 1004.87 |
| 1005.00 | 1005.54 | 1055.45 | 1055.80 | 1056.76 | 1097.41 |
| 1099.81 | 1101.06 | 1131.27 | 1138.58 | 1140.56 | 1163.11 |
| 1163.25 | 1163.34 | 1194.43 | 1195.70 | 1198.14 | 1312.56 |
| 1317.11 | 1317.67 | 1361.50 | 1364.29 | 1364.77 | 1458.91 |
| 1461.90 | 1462.90 | 1514.59 | 1515.12 | 1516.39 | 1637.99 |
| 1640.22 | 1640.40 | 1663.61 | 1664.02 | 1664.55 | 2249.71 |
| 3136.36 | 3140.80 | 3146.44 | 3146.89 | 3149.27 | 3151.30 |
| 3166.55 | 3166.93 | 3168.09 | 3174.57 | 3175.23 | 3177.26 |
| 3189.05 | 3189.34 | 3189.86 |         |         |         |

=====  
**20B Ph3Si+**  
=====

|         |         |         |         |         |         |
|---------|---------|---------|---------|---------|---------|
| 23.91   | 30.26   | 43.33   | 51.72   | 59.30   | 96.29   |
| 142.55  | 147.18  | 161.86  | 236.90  | 243.79  | 251.46  |
| 327.51  | 392.48  | 392.94  | 402.06  | 428.24  | 435.88  |
| 463.48  | 497.51  | 506.72  | 613.85  | 616.38  | 617.81  |
| 681.14  | 686.89  | 693.41  | 704.51  | 741.66  | 741.94  |
| 752.39  | 754.81  | 755.24  | 858.75  | 863.12  | 869.83  |
| 943.83  | 955.50  | 962.76  | 989.31  | 992.31  | 996.89  |
| 1000.56 | 1001.93 | 1005.58 | 1021.66 | 1025.53 | 1026.63 |
| 1052.93 | 1055.29 | 1055.95 | 1101.94 | 1109.96 | 1118.75 |
| 1122.88 | 1142.14 | 1145.64 | 1174.39 | 1174.97 | 1175.78 |
| 1201.25 | 1201.42 | 1209.94 | 1306.66 | 1319.42 | 1323.17 |
| 1369.06 | 1380.73 | 1384.41 | 1455.73 | 1461.72 | 1464.78 |
| 1502.39 | 1506.99 | 1509.75 | 1623.18 | 1627.19 | 1632.57 |
| 1650.60 | 1654.14 | 1656.47 | 3158.71 | 3159.82 | 3179.64 |
| 3180.90 | 3187.98 | 3191.69 | 3191.83 | 3194.12 | 3199.93 |
| 3201.85 | 3205.70 | 3207.29 | 3209.41 | 3211.41 | 3212.87 |

=====  
**20B Me3SiH**  
=====

|         |         |         |         |         |         |
|---------|---------|---------|---------|---------|---------|
| 137.73  | 147.51  | 148.11  | 179.14  | 179.58  | 213.57  |
| 595.97  | 596.23  | 622.66  | 659.45  | 707.50  | 707.88  |
| 841.41  | 841.96  | 869.11  | 918.57  | 918.84  | 1275.97 |
| 1276.09 | 1283.60 | 1434.51 | 1436.73 | 1436.90 | 1448.04 |
| 1448.13 | 1454.70 | 2245.47 | 3035.41 | 3037.06 | 3037.22 |
| 3129.34 | 3129.91 | 3129.98 | 3138.36 | 3138.42 | 3138.85 |

=====  
**00-CH3+**  
=====

|         |         |         |         |         |         |
|---------|---------|---------|---------|---------|---------|
| 1354.14 | 1354.50 | 1373.54 | 2982.55 | 3201.71 | 3201.91 |
|---------|---------|---------|---------|---------|---------|

=====  
**00-CH4**  
=====

|         |         |         |         |         |         |
|---------|---------|---------|---------|---------|---------|
| 1318.85 | 1319.08 | 1320.24 | 1541.39 | 1541.46 | 3038.86 |
| 3176.60 | 3177.37 | 3179.67 |         |         |         |

=====  
**00-toluene**  
=====

|         |         |         |         |         |         |
|---------|---------|---------|---------|---------|---------|
| 40.16   | 209.42  | 343.11  | 410.78  | 468.02  | 524.42  |
| 627.52  | 704.29  | 735.76  | 804.42  | 851.40  | 900.93  |
| 963.70  | 988.84  | 993.51  | 1008.54 | 1046.96 | 1058.59 |
| 1107.28 | 1160.64 | 1186.44 | 1244.19 | 1326.82 | 1374.63 |

1400.91 1457.06 1465.30 1495.19 1535.92 1660.59  
1684.21 3029.24 3104.91 3127.60 3156.72 3157.26  
3172.16 3181.51 3193.53

=====  
**1C**  
=====

53.45 60.86 69.93 102.18 118.24 196.56  
239.47 292.97 381.40 387.98 424.54 612.52  
647.02 671.90 679.29 725.02 741.98 752.31  
789.99 833.11 853.62 874.74 955.12 991.05  
1001.65 1029.78 1051.75 1114.63 1149.90 1177.44  
1203.55 1285.19 1290.89 1318.09 1390.77 1400.96  
1406.22 1409.47 1409.98 1463.34 1504.00 1622.15  
1651.80 3039.48 3041.29 3124.28 3128.97 3162.39  
3168.61 3174.16 3175.38 3193.92 3208.31 3212.86

=====  
**1CH**  
=====

29.05 83.74 131.57 145.02 152.73 177.02  
230.75 287.20 380.94 398.96 466.82 602.96  
624.44 648.02 693.84 705.08 710.71 728.17  
737.73 778.27 852.55 864.06 899.77 901.39  
924.73 973.17 997.55 1006.30 1056.48 1098.69  
1139.87 1162.53 1195.40 1275.82 1280.78 1316.18  
1364.74 1434.03 1436.75 1443.45 1447.96 1461.09  
1517.15 1641.94 1665.60 2253.18 3036.55 3037.69  
3128.31 3129.49 3134.41 3143.43 3144.23 3151.49  
3168.38 3178.74 3190.75

=====  
**2C**  
=====

65.81 81.78 120.16 151.75 283.47 380.20  
404.92 410.59 518.11 610.15 669.80 673.51  
722.24 752.06 763.26 796.79 853.57 910.29  
960.07 994.32 1000.89 1031.82 1049.09 1115.23  
1154.34 1178.71 1204.47 1287.44 1317.92 1393.92  
1395.72 1403.13 1464.28 1499.97 1615.23 1650.64  
2386.68 3038.63 3123.51 3168.77 3172.47 3179.46  
3194.49 3210.49 3214.36

=====  
**2CH**  
=====

14.94 100.44 140.24 184.59 246.02 381.29  
398.29 442.20 485.62 624.53 672.87 683.90  
707.98 710.48 733.47 770.48 862.90 884.40  
913.64 926.03 964.84 972.70 998.25 1006.64  
1057.11 1098.93 1138.83 1163.15 1195.54 1278.88  
1316.40 1364.77 1441.02 1442.63 1461.64 1517.25  
1643.07 1665.46 2260.53 2267.91 3046.58 3141.52  
3144.45 3150.63 3153.18 3169.45 3179.99 3191.52

=====  
**3C**  
=====

32.95 44.26 74.10 78.91 92.89 147.75  
148.72 223.30 249.92 277.34 366.57 389.61  
399.51 435.47 441.37 464.21 614.51 615.60  
672.15 686.28 692.93 727.28 739.77 752.39  
754.48 787.30 824.59 857.41 864.30 949.99  
958.93 990.15 996.43 1001.08 1004.55 1026.84  
1027.92 1053.57 1054.23 1108.45 1115.27 1137.57  
1149.62 1176.02 1176.26 1201.54 1204.92 1287.23  
1311.48 1322.51 1382.21 1385.07 1408.69 1414.22  
1460.24 1464.98 1503.72 1506.75 1624.18 1627.00  
1650.47 1655.27 3044.09 3131.79 3168.68 3169.30

3173.16 3177.82 3184.24 3193.07 3193.50 3205.88  
3206.07 3211.29 3211.55

=====  
**3CH**  
=====

17.45 34.08 51.56 94.28 124.50 144.25  
170.18 209.17 236.21 285.58 386.32 398.09  
401.06 422.28 460.23 481.06 623.92 624.59  
656.25 691.09 702.49 707.13 709.73 729.14  
735.50 751.35 773.95 847.88 864.17 868.88  
896.65 924.86 930.26 973.56 978.28 998.18  
1000.04 1004.18 1005.91 1055.00 1056.38 1098.31  
1100.05 1132.84 1141.10 1162.65 1162.98 1195.57  
1197.50 1278.88 1314.49 1315.94 1360.57 1363.44  
1437.92 1439.56 1459.68 1461.28 1514.68 1516.46  
1636.05 1640.55 1662.93 1664.51 2248.15 3038.62  
3128.43 3133.18 3138.06 3141.39 3145.53 3151.30  
3161.98 3168.92 3169.65 3178.88 3186.81 3191.92

=====  
**4C**  
=====

23.91 30.26 43.33 51.72 59.30 96.29  
142.55 147.18 161.86 236.90 243.79 251.46  
327.51 392.48 392.94 402.06 428.24 435.88  
463.48 497.51 506.72 613.85 616.38 617.81  
681.14 686.89 693.41 704.51 741.66 741.94  
752.39 754.81 755.24 858.75 863.12 869.83  
943.83 955.50 962.76 989.31 992.31 996.89  
1000.56 1001.93 1005.58 1021.66 1025.53 1026.63  
1052.93 1055.29 1055.95 1101.94 1109.96 1118.75  
1122.88 1142.14 1145.64 1174.39 1174.97 1175.78  
1201.25 1201.42 1209.94 1306.66 1319.42 1323.17  
1369.06 1380.73 1384.41 1455.73 1461.72 1464.78  
1502.39 1506.99 1509.75 1623.18 1627.19 1632.57  
1650.60 1654.14 1656.47 3158.71 3159.82 3179.64  
3180.90 3187.98 3191.69 3191.83 3194.12 3199.93  
3201.85 3205.70 3207.29 3209.41 3211.41 3212.87

=====  
**4CH**  
=====

29.05 83.74 131.57 145.02 152.73 177.02  
230.75 287.20 380.94 398.96 466.82 602.96  
624.44 648.02 693.84 705.08 710.71 728.17  
737.73 778.27 852.55 864.06 899.77 901.39  
924.73 973.17 997.55 1006.30 1056.48 1098.69  
1139.87 1162.53 1195.40 1275.82 1280.78 1316.18  
1364.74 1434.03 1436.75 1443.45 1447.96 1461.09  
1517.15 1641.94 1665.60 2253.18 3036.55 3037.69  
3128.31 3129.49 3134.41 3143.43 3144.23 3151.49  
3168.38 3178.74 3190.75

=====  
**5C**  
=====

29.95 35.06 66.20 198.48 199.16 211.54  
606.76 632.77 635.35 699.57 757.78 759.49  
835.87 902.00 902.54 1283.50 1283.75 1288.76  
1391.78 1391.88 1393.79 1394.58 1400.83 1401.85  
3028.54 3028.98 3032.11 3110.78 3111.84 3112.05  
3166.21 3166.77 3167.63

=====  
**5CH**  
=====

137.73 147.51 148.11 179.14 179.58 213.57  
595.97 596.23 622.66 659.45 707.50 707.88



841.41 841.96 869.11 918.57 918.84 1275.97  
1276.09 1283.60 1434.51 1436.73 1436.90 1448.04  
1448.13 1454.70 2245.47 3035.41 3037.06 3037.22  
3129.34 3129.91 3129.98 3138.36 3138.42 3138.85

=====  
**6C**  
=====

27.82 37.73 77.02 132.21 160.78 198.66  
244.56 382.55 392.02 411.14 420.96 442.23  
464.45 572.34 612.69 614.64 682.30 684.47  
703.06 737.95 751.91 752.60 840.53 856.22  
859.31 952.67 957.32 991.08 993.23 1000.54  
1003.18 1028.22 1028.49 1051.11 1052.14 1108.84  
1115.44 1137.50 1154.03 1176.65 1177.14 1201.85  
1205.42 1311.94 1321.56 1385.24 1388.62 1461.18  
1465.72 1500.66 1504.71 1619.99 1623.43 1648.06  
1655.03 2377.40 3167.96 3168.00 3180.04 3185.20  
3194.02 3194.36 3207.66 3207.82 3212.60 3212.77

=====  
**6CH**  
=====

3.88 25.74 49.84 149.26 157.02 194.18  
239.53 385.60 397.47 400.92 421.00 423.22  
477.63 602.82 624.10 624.98 691.92 704.86  
707.08 708.86 717.09 748.88 770.68 861.95  
864.88 868.99 928.30 928.95 966.17 974.97  
975.73 999.07 999.11 1005.95 1006.39 1055.84  
1056.83 1098.73 1099.62 1134.86 1140.26 1163.26  
1163.38 1194.69 1196.32 1314.76 1318.10 1364.55  
1365.81 1460.63 1463.28 1515.97 1516.64 1641.61  
1642.92 1665.08 1665.22 2259.83 2262.86 3151.07  
3152.15 3152.55 3153.91 3170.24 3170.51 3181.36  
3181.71 3192.24 3192.60

=====  
**7C**  
=====

34.17 51.67 212.35 448.03 600.13 622.48  
661.77 811.24 839.50 877.26 946.68 1278.48  
1284.36 1378.59 1380.99 1392.11 1394.32 2394.62  
3020.73 3023.94 3101.48 3103.63 3169.30 3170.19

=====  
**7CH**  
=====

145.99 156.47 189.09 447.48 566.22 625.17  
659.57 726.11 854.06 882.22 887.41 933.37  
975.64 1281.12 1286.16 1438.14 1441.87 1448.73  
1451.45 2259.19 2264.51 3042.39 3043.78 3136.63  
3137.02 3143.60 3144.12

=====  
**1CAn1 6A'**  
=====

12.29 25.87 39.20 46.39 52.62 68.32  
74.66 75.94 78.50 79.38 84.78 84.97  
89.57 99.16 117.32 146.71 160.07 168.06  
173.10 189.29 195.95 196.11 196.75 206.41  
240.77 242.99 253.01 278.00 302.77 310.26  
323.97 330.30 385.07 394.34 457.83 539.06  
541.34 582.60 582.64 597.21 599.42 613.59  
620.22 631.99 639.03 645.81 652.12 697.62  
701.23 710.07 714.56 724.72 739.24 741.53  
745.07 754.18 763.77 781.00 794.68 803.33  
810.82 814.16 819.77 821.75 822.20 823.34  
829.19 837.34 839.32 854.49 859.68 866.51  
868.06 870.62 902.66 905.46 905.81 916.01

933.53 938.15 940.89 945.06 954.90 962.65  
974.46 983.74 987.42 1004.18 1009.80 1056.20  
1059.21 1106.67 1121.66 1125.15 1142.16 1169.01  
1198.84 1287.68 1294.99 1319.38 1370.86 1414.20  
1417.63 1429.67 1432.33 1462.75 1514.86 1639.49  
1661.41 2696.07 2708.59 2719.50 2724.60 2735.32  
3036.15 3036.85 3132.16 3135.15 3144.52 3146.98  
3154.45 3159.31 3181.39 3193.53 3201.67 3202.47

=====  
**1Ctol**  
=====

26.99 46.38 53.15 78.79 87.48 122.24  
131.54 150.70 165.17 175.63 183.29 195.60  
196.60 258.67 295.11 310.89 349.28 382.72  
395.98 402.41 462.22 477.58 522.47 611.58  
620.45 654.29 690.77 693.73 702.06 724.53  
745.58 751.87 784.11 803.36 805.99 812.88  
852.86 859.85 864.16 938.19 941.97 982.75  
987.02 993.62 1000.79 1004.73 1016.56 1017.77  
1027.38 1037.52 1055.86 1097.54 1106.79 1139.98  
1158.08 1170.74 1191.14 1199.39 1251.59 1287.53  
1296.07 1318.32 1324.00 1371.20 1386.45 1404.36  
1419.66 1423.44 1430.53 1436.38 1444.01 1458.42  
1460.82 1492.26 1504.84 1513.70 1594.57 1636.47  
1659.05 1663.23 3023.25 3041.78 3043.68 3109.08  
3131.21 3134.99 3136.01 3149.49 3152.36 3156.72  
3157.51 3158.42 3181.16 3185.53 3185.93 3195.92  
3196.48 3198.68 3204.34

=====  
**2CAn1**  
=====

3.47 6.67 24.88 41.65 58.50 69.24  
69.57 76.04 77.29 78.54 81.44 86.73  
90.73 98.98 125.89 149.90 161.85 177.62  
196.65 197.25 201.07 238.98 240.94 253.44  
282.52 301.77 311.01 324.68 330.80 393.48  
401.11 455.80 538.77 540.79 582.37 582.56  
597.02 600.18 613.46 619.97 631.47 638.47  
645.56 656.89 698.15 699.53 709.38 712.97  
727.30 738.38 741.60 750.43 760.68 764.18  
782.94 791.56 802.66 808.50 818.03 821.09  
821.87 824.23 829.06 836.99 838.65 852.69  
861.67 864.71 868.24 888.34 899.18 902.74  
907.78 912.30 934.77 936.73 940.13 944.59  
953.49 964.90 975.88 983.76 986.80 1004.92  
1011.93 1055.85 1057.56 1106.26 1120.17 1124.00  
1141.61 1169.46 1197.87 1291.06 1319.52 1371.71  
1416.02 1418.68 1463.62 1514.49 1640.41 1661.16  
2354.63 2703.79 2714.70 2734.55 2738.16 2743.68  
3039.53 3141.07 3147.04 3151.58 3161.40 3181.90  
3194.08 3201.96 3207.16

=====  
**2Ctol**  
=====

25.48 42.73 59.70 74.03 81.39 129.92  
135.90 156.57 174.19 190.84 244.44 291.03  
331.77 349.24 396.21 397.23 399.60 460.45  
481.36 522.40 610.07 619.93 667.90 693.11  
701.40 703.22 731.21 749.78 759.55 783.08  
803.92 814.31 849.93 865.81 898.03 942.25  
944.22 984.34 985.73 993.85 1000.59 1004.52  
1017.67 1017.83 1025.39 1036.00 1054.75 1095.43  
1105.98 1141.28 1158.32 1171.15 1191.47 1198.99  
1251.82 1292.16 1318.94 1323.60 1371.06 1384.06  
1405.57 1424.73 1426.62 1443.05 1457.81 1461.11  
1494.43 1502.36 1512.82 1589.57 1635.70 1658.00

1662.95 2328.40 3023.97 3046.68 3109.79 3124.13  
3144.13 3151.50 3152.18 3155.47 3160.44 3182.64  
3184.72 3186.29 3194.84 3197.33 3197.65 3204.72

=====  
**3CAn1 6B' 13A'**  
=====

6.20 20.06 24.94 34.10 39.63 52.56  
61.61 68.37 69.45 74.36 76.98 79.29  
79.68 86.04 88.92 90.96 98.61 143.49  
150.56 159.97 174.31 193.45 196.12 196.43  
208.57 223.73 240.99 243.39 248.13 252.19  
302.45 323.26 326.19 330.68 371.47 393.58  
399.58 448.54 465.47 472.23 538.82 541.64  
581.56 582.74 596.34 597.57 613.35 619.66  
621.36 631.55 636.70 644.59 673.85 702.10  
705.29 709.31 713.54 717.13 738.93 739.97  
743.97 747.16 760.20 762.98 782.55 791.60  
793.35 802.36 810.41 814.30 817.39 820.99  
822.54 829.02 833.28 838.16 852.74 861.78  
864.80 867.52 868.91 898.34 900.79 902.05  
914.57 934.47 934.64 939.75 941.00 943.95  
953.52 959.73 976.20 981.35 982.10 985.70  
1002.93 1003.89 1009.32 1011.42 1054.63 1057.08  
1057.49 1104.22 1106.97 1119.77 1124.26 1133.70  
1145.38 1168.46 1169.15 1199.04 1200.78 1287.59  
1316.40 1321.48 1368.37 1370.06 1415.72 1420.31  
1459.76 1463.44 1514.15 1514.87 1637.19 1639.77  
1659.87 1661.54 2712.68 2725.12 2731.41 2734.13  
2739.63 3040.23 3137.78 3150.77 3152.04 3154.17  
3157.88 3164.15 3179.55 3181.37 3190.89 3192.54  
3199.41 3201.26 3207.14

=====  
**3Ctol1**  
=====

21.85 28.81 41.42 60.52 62.85 77.69  
92.77 97.36 135.83 149.59 161.54 179.63  
195.72 202.48 219.75 246.62 270.79 315.31  
350.18 378.42 394.09 401.32 403.81 450.60  
467.71 472.08 477.73 524.30 611.21 620.49  
621.87 672.38 693.41 701.25 707.02 715.19  
738.51 751.77 757.40 771.64 793.67 810.12  
811.48 850.36 860.06 868.89 920.90 935.19  
945.94 981.91 986.54 988.99 992.08 1000.73  
1003.03 1004.36 1015.77 1016.55 1017.40 1026.57  
1035.34 1055.82 1057.91 1095.28 1103.85 1109.51  
1131.63 1142.65 1156.14 1170.91 1171.79 1191.36  
1198.30 1202.48 1251.77 1288.56 1313.11 1321.21  
1323.35 1368.32 1370.20 1387.05 1401.90 1424.89  
1428.93 1444.49 1458.82 1460.31 1463.11 1490.96  
1504.96 1513.12 1513.70 1594.03 1635.76 1638.20  
1658.20 1659.47 1664.95 3023.61 3042.64 3112.69  
3125.41 3134.86 3139.09 3153.27 3158.55 3161.35  
3162.42 3174.56 3184.28 3184.70 3184.89 3187.69  
3195.51 3196.88 3197.04 3198.74 3203.55 3206.00

=====  
**4CAn1 13B' 20B'**  
=====

7.94 18.56 25.74 32.07 40.99 45.10  
49.67 54.69 60.54 64.76 69.18 74.47  
76.63 80.88 81.24 82.19 86.81 89.73  
92.85 98.30 166.21 168.54 189.14 194.49  
195.75 196.11 207.33 234.51 241.40 243.82  
247.87 250.49 252.62 301.99 322.77 329.91  
357.56 395.75 397.83 404.52 441.67 448.94  
483.79 498.03 503.46 538.69 540.65 581.38  
582.20 595.68 599.58 611.03 618.59 620.23

|         |         |         |         |         |         |
|---------|---------|---------|---------|---------|---------|
| 620.74  | 630.79  | 636.40  | 642.94  | 683.22  | 701.27  |
| 703.54  | 706.64  | 708.59  | 712.99  | 730.75  | 734.52  |
| 738.34  | 739.07  | 748.84  | 751.54  | 752.55  | 764.58  |
| 781.43  | 790.81  | 800.96  | 810.10  | 817.93  | 819.93  |
| 823.50  | 827.58  | 830.59  | 837.82  | 851.59  | 860.82  |
| 861.71  | 865.33  | 868.48  | 869.95  | 898.20  | 900.35  |
| 901.32  | 914.63  | 933.51  | 936.67  | 937.58  | 939.90  |
| 942.76  | 944.17  | 953.28  | 958.74  | 977.05  | 980.24  |
| 980.75  | 983.81  | 983.98  | 1001.63 | 1002.88 | 1003.78 |
| 1009.05 | 1009.95 | 1010.93 | 1052.31 | 1055.00 | 1055.88 |
| 1057.23 | 1101.69 | 1105.33 | 1105.78 | 1119.85 | 1122.46 |
| 1123.76 | 1139.68 | 1143.49 | 1167.21 | 1168.14 | 1168.84 |
| 1198.36 | 1199.08 | 1201.38 | 1313.78 | 1318.59 | 1320.44 |
| 1366.87 | 1368.14 | 1368.87 | 1457.16 | 1461.00 | 1462.39 |
| 1511.35 | 1512.71 | 1513.53 | 1634.88 | 1636.57 | 1638.10 |
| 1658.68 | 1659.37 | 1659.89 | 2716.39 | 2731.81 | 2735.51 |
| 2740.75 | 2746.23 | 3154.37 | 3154.46 | 3157.35 | 3163.24 |
| 3165.79 | 3177.58 | 3180.14 | 3180.44 | 3183.13 | 3191.24 |
| 3191.30 | 3191.76 | 3199.48 | 3200.19 | 3200.45 | 3209.44 |

=====  
**4Ctol**  
=====

|         |         |         |         |         |         |
|---------|---------|---------|---------|---------|---------|
| 18.60   | 27.01   | 29.51   | 39.09   | 50.52   | 61.65   |
| 66.79   | 75.07   | 87.31   | 91.55   | 109.23  | 139.03  |
| 169.51  | 187.01  | 200.04  | 204.96  | 237.94  | 245.91  |
| 253.03  | 272.21  | 345.79  | 349.97  | 394.96  | 398.70  |
| 404.14  | 411.83  | 443.66  | 452.78  | 473.48  | 487.45  |
| 496.34  | 504.00  | 524.13  | 612.74  | 619.68  | 621.96  |
| 622.58  | 681.17  | 694.66  | 703.12  | 707.11  | 710.11  |
| 726.87  | 729.12  | 748.72  | 751.71  | 753.39  | 788.34  |
| 809.76  | 849.80  | 861.25  | 867.98  | 873.60  | 916.06  |
| 935.67  | 945.61  | 952.42  | 983.34  | 985.16  | 988.53  |
| 990.32  | 994.38  | 1001.91 | 1002.45 | 1003.74 | 1004.18 |
| 1015.50 | 1015.87 | 1016.31 | 1019.66 | 1026.34 | 1035.77 |
| 1056.86 | 1057.12 | 1058.08 | 1094.92 | 1102.17 | 1108.28 |
| 1109.81 | 1123.04 | 1137.55 | 1140.34 | 1154.97 | 1170.07 |
| 1171.28 | 1171.34 | 1190.53 | 1199.08 | 1200.99 | 1204.91 |
| 1251.02 | 1310.98 | 1317.62 | 1321.41 | 1323.34 | 1367.86 |
| 1369.36 | 1370.71 | 1386.99 | 1402.86 | 1445.13 | 1456.93 |
| 1459.16 | 1462.09 | 1462.71 | 1489.10 | 1505.70 | 1511.50 |
| 1512.81 | 1513.91 | 1596.61 | 1633.86 | 1636.59 | 1637.72 |
| 1657.69 | 1659.28 | 1659.66 | 1664.82 | 3028.60 | 3112.16 |
| 3128.00 | 3143.30 | 3154.78 | 3157.46 | 3162.50 | 3172.40 |
| 3173.42 | 3179.52 | 3183.84 | 3185.12 | 3185.99 | 3186.97 |
| 3187.16 | 3195.70 | 3196.41 | 3196.46 | 3197.36 | 3203.01 |
| 3203.80 | 3205.50 | 3205.69 |         |         |         |

=====  
**5CAn1    13A'    19B'**  
=====

|         |         |         |         |         |         |
|---------|---------|---------|---------|---------|---------|
| 36.46   | 44.96   | 48.94   | 68.96   | 71.08   | 75.55   |
| 77.93   | 78.75   | 84.10   | 84.38   | 92.11   | 99.05   |
| 129.43  | 137.70  | 151.50  | 160.65  | 163.62  | 177.96  |
| 196.68  | 197.21  | 198.25  | 199.00  | 210.29  | 240.92  |
| 246.15  | 255.26  | 289.79  | 303.46  | 324.20  | 330.86  |
| 538.14  | 540.58  | 581.94  | 582.29  | 596.32  | 598.28  |
| 612.97  | 617.26  | 631.78  | 638.83  | 644.22  | 684.48  |
| 693.91  | 694.42  | 709.64  | 712.39  | 737.70  | 741.13  |
| 762.37  | 768.89  | 774.24  | 781.71  | 791.10  | 804.37  |
| 808.46  | 818.61  | 821.55  | 821.90  | 827.95  | 832.07  |
| 837.74  | 851.40  | 853.76  | 862.73  | 866.08  | 879.20  |
| 885.17  | 898.39  | 904.00  | 906.50  | 910.22  | 936.19  |
| 939.57  | 943.34  | 952.53  | 962.26  | 982.67  | 986.84  |
| 1056.14 | 1119.51 | 1123.75 | 1283.94 | 1287.21 | 1294.03 |
| 1408.32 | 1409.26 | 1418.84 | 1423.40 | 1429.85 | 1437.15 |
| 2704.59 | 2720.98 | 2735.26 | 2741.26 | 2746.73 | 3040.48 |
| 3041.12 | 3042.16 | 3135.91 | 3136.48 | 3140.49 | 3152.87 |
| 3157.76 | 3158.09 | 3208.68 |         |         |         |

## =====

**5Ctol**

=====

|         |         |         |         |         |         |
|---------|---------|---------|---------|---------|---------|
| 34.63   | 50.94   | 70.34   | 114.45  | 133.25  | 152.20  |
| 170.47  | 173.03  | 181.55  | 193.57  | 210.56  | 215.36  |
| 237.32  | 336.06  | 351.00  | 401.76  | 488.84  | 529.17  |
| 610.99  | 621.39  | 684.84  | 689.36  | 696.78  | 706.15  |
| 762.10  | 769.63  | 800.48  | 808.76  | 837.23  | 855.95  |
| 871.54  | 875.94  | 937.31  | 986.13  | 995.54  | 1005.23 |
| 1020.01 | 1030.10 | 1039.48 | 1094.48 | 1157.69 | 1193.79 |
| 1251.61 | 1288.83 | 1290.50 | 1298.87 | 1323.94 | 1386.83 |
| 1406.59 | 1416.24 | 1420.22 | 1421.52 | 1429.56 | 1434.39 |
| 1440.25 | 1445.10 | 1458.78 | 1490.71 | 1503.39 | 1590.14 |
| 1664.56 | 3036.89 | 3039.36 | 3040.09 | 3045.33 | 3112.98 |
| 3116.56 | 3130.63 | 3131.92 | 3135.99 | 3148.94 | 3149.81 |
| 3156.67 | 3158.53 | 3183.73 | 3187.05 | 3196.49 | 3199.60 |

## =====

**6CAn1**

=====

|         |         |         |         |         |         |
|---------|---------|---------|---------|---------|---------|
| 4.20    | 17.71   | 29.39   | 36.92   | 45.34   | 52.42   |
| 57.23   | 66.15   | 69.37   | 75.15   | 76.79   | 80.46   |
| 83.23   | 84.87   | 86.70   | 90.19   | 98.94   | 167.06  |
| 172.53  | 186.33  | 196.33  | 196.86  | 199.67  | 237.54  |
| 240.78  | 244.31  | 251.85  | 302.52  | 323.12  | 329.74  |
| 332.61  | 391.62  | 397.02  | 407.81  | 448.33  | 461.82  |
| 470.78  | 538.38  | 541.02  | 581.11  | 582.59  | 595.74  |
| 598.79  | 613.93  | 619.62  | 621.09  | 631.39  | 636.95  |
| 644.70  | 697.01  | 699.80  | 701.41  | 708.28  | 712.68  |
| 723.58  | 735.11  | 738.62  | 742.35  | 746.91  | 760.36  |
| 766.47  | 785.22  | 790.33  | 803.59  | 808.16  | 818.74  |
| 820.42  | 821.61  | 822.10  | 827.58  | 832.55  | 836.81  |
| 850.30  | 860.07  | 862.15  | 863.80  | 868.57  | 897.62  |
| 899.56  | 906.93  | 912.09  | 932.76  | 934.99  | 938.00  |
| 938.69  | 942.63  | 953.11  | 962.38  | 974.79  | 978.37  |
| 980.26  | 985.02  | 1003.39 | 1003.98 | 1010.05 | 1011.05 |
| 1054.69 | 1055.65 | 1057.05 | 1105.25 | 1107.09 | 1117.69 |
| 1122.13 | 1132.92 | 1148.70 | 1168.80 | 1169.43 | 1197.83 |
| 1200.42 | 1317.29 | 1320.62 | 1370.23 | 1372.13 | 1461.04 |
| 1464.41 | 1512.78 | 1513.17 | 1636.95 | 1639.62 | 1659.78 |
| 1660.97 | 2334.24 | 2719.07 | 2732.23 | 2740.73 | 2743.37 |
| 2748.30 | 3151.49 | 3157.97 | 3160.04 | 3171.19 | 3181.12 |
| 3181.84 | 3193.59 | 3193.63 | 3201.42 | 3201.72 | 3212.96 |

## =====

**6Ctol**

=====

|         |         |         |         |         |         |
|---------|---------|---------|---------|---------|---------|
| 21.72   | 30.70   | 34.90   | 46.62   | 67.87   | 72.77   |
| 81.53   | 99.08   | 134.51  | 175.49  | 183.03  | 193.32  |
| 232.36  | 269.32  | 335.25  | 348.90  | 392.87  | 394.57  |
| 400.70  | 421.76  | 443.78  | 467.50  | 471.28  | 476.53  |
| 521.60  | 611.64  | 618.82  | 621.34  | 690.04  | 694.69  |
| 700.25  | 704.69  | 720.58  | 740.03  | 747.77  | 758.85  |
| 791.01  | 807.88  | 827.82  | 849.32  | 863.58  | 864.34  |
| 936.67  | 941.28  | 941.78  | 982.63  | 983.90  | 987.97  |
| 991.21  | 1001.17 | 1002.33 | 1004.42 | 1016.01 | 1016.62 |
| 1019.02 | 1025.66 | 1037.01 | 1055.14 | 1055.75 | 1096.64 |
| 1102.59 | 1109.05 | 1131.29 | 1143.54 | 1156.68 | 1170.97 |
| 1172.39 | 1189.84 | 1196.23 | 1202.22 | 1250.70 | 1312.80 |
| 1320.59 | 1323.29 | 1370.01 | 1372.35 | 1386.80 | 1405.51 |
| 1444.28 | 1458.36 | 1459.61 | 1463.48 | 1491.66 | 1504.03 |
| 1511.11 | 1513.25 | 1594.46 | 1635.05 | 1638.11 | 1657.17 |
| 1658.68 | 1662.35 | 2325.34 | 3025.18 | 3109.21 | 3138.25 |
| 3151.31 | 3152.60 | 3158.60 | 3162.66 | 3170.15 | 3182.40 |
| 3185.21 | 3186.10 | 3188.27 | 3196.72 | 3197.13 | 3198.59 |
| 3198.94 | 3204.44 | 3207.00 |         |         |         |

=====  
**7CAn1**  
=====

|         |         |         |         |         |         |
|---------|---------|---------|---------|---------|---------|
| 15.34   | 44.36   | 50.51   | 68.19   | 69.86   | 75.37   |
| 77.67   | 78.67   | 82.45   | 84.88   | 90.59   | 98.61   |
| 131.81  | 142.32  | 144.86  | 164.64  | 188.80  | 196.83  |
| 197.33  | 210.94  | 239.08  | 240.94  | 252.36  | 302.24  |
| 309.10  | 323.69  | 331.41  | 537.41  | 540.55  | 581.60  |
| 582.19  | 596.12  | 598.14  | 613.29  | 625.25  | 629.97  |
| 634.94  | 638.59  | 644.19  | 679.27  | 704.88  | 708.45  |
| 712.75  | 737.49  | 740.21  | 760.14  | 779.74  | 788.09  |
| 790.05  | 801.29  | 807.66  | 818.07  | 820.45  | 821.89  |
| 828.71  | 831.53  | 837.04  | 851.52  | 855.98  | 865.64  |
| 867.63  | 870.92  | 897.76  | 901.29  | 904.23  | 909.55  |
| 914.25  | 935.60  | 939.39  | 943.49  | 953.54  | 963.57  |
| 982.97  | 987.56  | 1055.88 | 1120.02 | 1124.08 | 1287.99 |
| 1293.40 | 1417.91 | 1419.88 | 1427.68 | 1434.14 | 2366.66 |
| 2706.48 | 2720.60 | 2737.10 | 2743.57 | 2749.26 | 3041.62 |
| 3045.66 | 3138.90 | 3140.79 | 3154.92 | 3158.72 | 3207.73 |

=====  
**7Ctol**  
=====

|         |         |         |         |         |         |
|---------|---------|---------|---------|---------|---------|
| 45.42   | 51.09   | 75.28   | 118.63  | 142.34  | 159.17  |
| 189.81  | 193.07  | 217.30  | 218.68  | 348.98  | 362.10  |
| 402.82  | 493.18  | 525.59  | 610.05  | 627.89  | 659.39  |
| 697.05  | 702.79  | 710.46  | 782.94  | 798.94  | 811.67  |
| 858.09  | 859.77  | 864.45  | 906.87  | 933.86  | 984.73  |
| 994.76  | 1007.82 | 1018.11 | 1028.82 | 1039.24 | 1092.28 |
| 1158.27 | 1193.80 | 1251.44 | 1291.32 | 1297.87 | 1324.02 |
| 1385.23 | 1407.67 | 1418.79 | 1420.80 | 1429.92 | 1435.52 |
| 1443.64 | 1456.99 | 1491.99 | 1501.81 | 1586.94 | 1661.85 |
| 2341.80 | 3037.09 | 3042.61 | 3043.74 | 3111.70 | 3118.51 |
| 3132.54 | 3134.29 | 3157.27 | 3158.35 | 3160.31 | 3185.15 |
| 3188.69 | 3197.44 | 3201.56 |         |         |         |

=====  
**1CAn2 6A''**  
=====

|         |         |         |         |         |         |
|---------|---------|---------|---------|---------|---------|
| 29.84   | 41.93   | 54.80   | 58.79   | 65.98   | 69.71   |
| 74.92   | 81.39   | 82.57   | 84.71   | 85.79   | 93.06   |
| 94.51   | 103.75  | 138.58  | 153.99  | 167.16  | 171.58  |
| 189.38  | 196.42  | 197.23  | 213.28  | 216.44  | 237.34  |
| 240.06  | 248.42  | 254.68  | 278.80  | 288.36  | 306.66  |
| 324.22  | 330.47  | 385.57  | 398.48  | 463.00  | 532.18  |
| 534.01  | 577.61  | 578.65  | 586.35  | 603.43  | 605.49  |
| 621.08  | 629.74  | 643.74  | 644.59  | 648.78  | 703.35  |
| 705.44  | 707.28  | 718.54  | 729.67  | 734.74  | 735.79  |
| 754.79  | 758.71  | 762.04  | 788.12  | 791.01  | 792.34  |
| 804.19  | 805.57  | 808.94  | 813.45  | 814.89  | 826.19  |
| 828.47  | 830.78  | 839.61  | 843.27  | 863.25  | 872.66  |
| 875.52  | 877.25  | 903.92  | 911.67  | 912.01  | 913.40  |
| 939.86  | 942.03  | 946.76  | 948.56  | 950.97  | 951.76  |
| 993.98  | 995.01  | 998.97  | 1004.07 | 1028.16 | 1040.61 |
| 1059.60 | 1098.97 | 1130.49 | 1138.95 | 1139.02 | 1167.53 |
| 1199.11 | 1282.93 | 1289.85 | 1295.53 | 1343.85 | 1426.13 |
| 1429.63 | 1433.01 | 1439.17 | 1451.51 | 1505.37 | 1600.48 |
| 1621.48 | 2675.92 | 2677.06 | 2681.12 | 2681.60 | 2687.38 |
| 2986.79 | 2989.38 | 3066.08 | 3074.59 | 3076.21 | 3082.18 |
| 3092.03 | 3104.11 | 3114.27 | 3127.02 | 3134.01 | 3134.53 |

=====  
**2CAn2**  
=====

|        |        |        |        |        |        |
|--------|--------|--------|--------|--------|--------|
| 16.59  | 32.28  | 48.14  | 57.12  | 58.05  | 70.08  |
| 73.73  | 76.50  | 81.43  | 84.94  | 85.33  | 86.56  |
| 95.68  | 98.55  | 115.97 | 137.51 | 159.72 | 175.19 |
| 194.95 | 197.15 | 198.12 | 237.52 | 241.87 | 251.61 |
| 278.39 | 284.72 | 294.89 | 326.17 | 331.83 | 391.64 |

|         |         |         |         |         |         |
|---------|---------|---------|---------|---------|---------|
| 400.30  | 452.02  | 536.95  | 538.96  | 583.78  | 584.67  |
| 595.86  | 605.28  | 606.84  | 619.25  | 629.23  | 643.53  |
| 645.96  | 663.92  | 695.04  | 701.17  | 709.84  | 712.82  |
| 737.57  | 742.39  | 743.46  | 754.22  | 755.73  | 767.31  |
| 792.09  | 792.92  | 794.64  | 809.44  | 810.88  | 818.02  |
| 820.52  | 828.67  | 829.40  | 838.66  | 841.66  | 842.66  |
| 855.87  | 869.33  | 872.34  | 900.51  | 901.67  | 902.57  |
| 904.02  | 904.86  | 933.00  | 936.58  | 939.16  | 944.12  |
| 948.12  | 950.67  | 971.46  | 988.32  | 990.75  | 1004.34 |
| 1008.58 | 1055.18 | 1055.74 | 1107.45 | 1122.50 | 1122.62 |
| 1141.74 | 1168.99 | 1198.96 | 1284.75 | 1321.12 | 1373.73 |
| 1413.59 | 1422.35 | 1463.87 | 1514.23 | 1640.39 | 1661.74 |
| 2325.76 | 2733.42 | 2734.62 | 2738.63 | 2738.67 | 2744.15 |
| 3041.03 | 3142.08 | 3152.81 | 3159.11 | 3170.77 | 3181.18 |
| 3194.88 | 3202.02 | 3206.32 |         |         |         |

=====  
**3CAn2**            **6B''**            **13A''**  
=====

|         |         |         |         |         |         |
|---------|---------|---------|---------|---------|---------|
| 20.58   | 27.69   | 37.42   | 44.85   | 48.41   | 54.64   |
| 65.15   | 71.13   | 74.12   | 76.55   | 81.81   | 82.53   |
| 85.76   | 86.75   | 92.92   | 95.07   | 98.74   | 142.42  |
| 154.74  | 167.77  | 189.30  | 196.29  | 196.88  | 197.98  |
| 212.16  | 221.85  | 238.57  | 240.55  | 249.34  | 251.74  |
| 287.66  | 292.89  | 327.22  | 329.85  | 380.60  | 393.23  |
| 401.95  | 453.28  | 460.91  | 464.23  | 537.53  | 538.24  |
| 583.11  | 584.39  | 595.66  | 605.46  | 606.18  | 619.94  |
| 621.05  | 630.80  | 642.87  | 644.75  | 671.83  | 696.31  |
| 702.15  | 710.89  | 711.68  | 721.27  | 737.24  | 741.76  |
| 742.41  | 747.34  | 755.32  | 759.07  | 784.66  | 791.80  |
| 792.60  | 804.91  | 809.70  | 810.14  | 818.80  | 819.55  |
| 822.52  | 828.52  | 828.62  | 839.60  | 841.19  | 856.84  |
| 862.84  | 868.27  | 870.24  | 901.24  | 901.44  | 902.38  |
| 903.67  | 932.18  | 936.85  | 938.49  | 939.80  | 944.58  |
| 946.45  | 949.27  | 973.04  | 979.74  | 987.48  | 988.69  |
| 1002.28 | 1003.50 | 1008.22 | 1010.46 | 1055.19 | 1057.31 |
| 1057.77 | 1105.05 | 1110.08 | 1122.22 | 1122.48 | 1131.66 |
| 1145.31 | 1168.32 | 1169.24 | 1199.36 | 1203.03 | 1287.53 |
| 1315.67 | 1323.37 | 1368.34 | 1372.76 | 1425.20 | 1432.24 |
| 1459.55 | 1464.20 | 1513.65 | 1514.02 | 1637.49 | 1639.73 |
| 1660.86 | 1661.43 | 2731.68 | 2733.29 | 2737.05 | 2737.38 |
| 2742.81 | 3040.46 | 3137.69 | 3151.55 | 3157.11 | 3163.09 |
| 3165.68 | 3174.97 | 3178.27 | 3180.77 | 3189.66 | 3192.78 |
| 3198.16 | 3200.07 | 3206.57 |         |         |         |

=====  
**4CAn2**            **13B''**            **20B''**  
=====

|         |         |         |         |         |         |
|---------|---------|---------|---------|---------|---------|
| 0.85    | 19.63   | 32.84   | 35.15   | 38.92   | 45.05   |
| 49.63   | 55.79   | 58.50   | 71.50   | 72.21   | 76.50   |
| 80.15   | 82.94   | 84.59   | 85.59   | 85.91   | 95.39   |
| 102.97  | 109.74  | 155.54  | 168.33  | 187.41  | 194.02  |
| 196.02  | 197.46  | 207.37  | 230.27  | 239.00  | 240.23  |
| 245.55  | 251.81  | 255.21  | 285.85  | 328.04  | 329.13  |
| 350.56  | 391.26  | 402.04  | 406.07  | 431.70  | 455.10  |
| 475.03  | 500.19  | 503.90  | 537.71  | 538.37  | 583.14  |
| 584.53  | 595.73  | 605.44  | 606.78  | 619.35  | 621.74  |
| 622.10  | 632.84  | 641.59  | 645.09  | 682.20  | 698.94  |
| 702.73  | 709.38  | 711.09  | 711.81  | 725.29  | 736.19  |
| 741.44  | 742.36  | 747.62  | 748.81  | 753.09  | 758.62  |
| 791.40  | 792.50  | 796.56  | 809.28  | 810.32  | 818.43  |
| 820.12  | 827.89  | 828.23  | 840.30  | 841.63  | 857.58  |
| 865.73  | 867.16  | 868.10  | 870.14  | 900.17  | 901.72  |
| 903.18  | 904.10  | 933.09  | 936.77  | 937.29  | 938.88  |
| 944.38  | 946.23  | 948.23  | 948.40  | 975.04  | 981.74  |
| 984.54  | 987.55  | 988.19  | 1001.52 | 1002.48 | 1002.74 |
| 1007.08 | 1008.47 | 1010.55 | 1055.11 | 1056.63 | 1056.76 |
| 1057.62 | 1101.43 | 1108.52 | 1110.45 | 1122.15 | 1122.42 |
| 1122.49 | 1137.47 | 1142.37 | 1166.98 | 1168.62 | 1168.77 |

1199.50 1201.98 1206.42 1311.55 1321.07 1322.89  
1363.78 1367.23 1370.86 1456.67 1461.86 1464.13  
1512.60 1513.23 1514.73 1634.23 1637.26 1638.30  
1660.24 1660.87 1661.46 2730.85 2732.28 2736.29  
2736.33 2741.93 3154.14 3158.97 3160.31 3166.46  
3168.54 3175.06 3177.52 3178.89 3181.22 3185.78  
3187.85 3192.02 3196.66 3198.42 3199.50 3205.40

=====

**5CAn2**            **13A''**            **19B''**

=====

33.46 57.48 57.74 70.56 72.22 77.32  
81.06 85.28 86.24 87.64 89.72 97.98  
118.73 127.24 145.69 158.17 163.97 169.69  
196.03 197.28 205.77 209.04 226.85 237.64  
241.40 252.07 276.49 288.95 326.59 333.22  
537.09 539.06 583.92 585.15 596.30 605.77  
607.09 614.12 632.12 644.65 645.92 690.67  
691.74 697.61 709.83 713.11 741.90 743.62  
756.78 765.53 781.77 791.91 792.83 794.33  
809.42 810.56 818.34 820.36 828.88 829.04  
838.79 842.06 854.96 869.35 871.30 883.89  
888.60 900.48 901.85 904.18 905.64 936.72  
939.39 943.81 948.25 950.47 988.42 990.05  
1055.07 1122.71 1122.78 1284.23 1285.77 1293.37  
1405.64 1413.56 1417.07 1420.67 1430.37 1437.94  
2734.15 2735.39 2739.35 2739.45 2744.88 3036.36  
3037.09 3039.23 3133.65 3133.91 3134.47 3151.38  
3158.71 3159.08 3206.61

=====

**6CAn2**

=====

7.59 13.27 30.77 32.36 43.01 52.80  
61.11 64.36 70.10 76.51 76.98 81.40  
82.78 85.46 88.78 93.22 101.38 160.26  
169.29 186.47 195.51 197.19 205.80 238.78  
239.61 245.24 251.70 287.33 311.82 327.40  
334.54 393.93 399.87 403.44 447.60 458.70  
475.09 537.68 538.77 583.75 585.05 596.00  
605.77 606.41 619.13 620.00 630.30 644.09  
645.61 691.52 700.04 700.70 705.61 710.49  
712.59 718.01 742.65 742.85 748.93 751.47  
759.19 792.25 792.69 798.64 800.16 809.59  
810.71 818.23 820.06 828.81 828.97 838.51  
841.43 863.69 867.60 869.05 871.73 900.76  
901.84 902.60 903.92 936.84 936.99 938.21  
943.33 944.83 947.26 951.12 978.51 982.77  
988.21 989.40 1002.22 1004.00 1010.39 1011.07  
1054.79 1054.99 1055.74 1104.43 1107.80 1122.54  
1122.91 1129.70 1144.90 1168.25 1169.09 1198.18  
1202.98 1317.28 1321.44 1367.65 1370.09 1459.93  
1464.12 1512.51 1513.78 1635.32 1638.76 1659.26  
1660.74 2400.69 2733.82 2734.62 2738.71 2738.84  
2744.19 3149.11 3151.38 3161.12 3161.95 3178.51  
3178.71 3189.24 3190.41 3198.79 3198.99 3206.74

=====

**7CAn2**

=====

14.65 55.53 60.78 69.08 71.22 79.43  
79.96 82.82 85.52 86.68 87.89 99.25  
119.70 148.87 164.42 165.71 194.48 196.46  
197.37 218.73 237.69 240.85 251.33 284.49  
295.36 326.44 333.39 537.22 538.70 583.73  
585.07 595.84 605.01 606.47 622.57 629.51  
629.87 645.07 646.79 675.91 703.70 709.87  
712.78 742.44 743.57 756.43 786.48 792.03  
792.89 794.29 809.27 810.80 817.94 820.42



829.01 829.42 838.19 841.58 855.66 870.21  
871.73 873.04 900.15 901.37 903.35 904.44  
907.80 936.79 938.61 944.21 948.09 951.17  
989.19 990.89 1054.94 1122.66 1122.86 1287.75  
1293.11 1415.22 1418.52 1427.93 1434.35 2391.34  
2734.79 2735.78 2739.75 2739.90 2745.22 3040.09  
3042.82 3138.11 3138.88 3154.85 3156.06 3206.71

=====

**HB**

=====

17.72 31.32 48.96 56.96 98.36 111.18  
124.16 133.88 137.35 140.70 146.64 150.98  
152.84 180.97 192.55 195.89 203.77 219.77  
287.56 302.87 377.30 397.15 456.42 607.40  
614.19 619.55 647.33 674.88 684.23 697.92  
702.69 722.44 733.64 746.60 758.15 760.63  
783.99 810.58 844.83 857.86 863.82 865.20  
880.63 897.44 941.29 985.22 996.21 1006.30  
1020.41 1055.47 1107.44 1141.80 1172.78 1198.61  
1286.03 1287.35 1288.57 1292.04 1296.32 1317.51  
1373.40 1411.67 1413.48 1415.15 1419.18 1420.58  
1425.48 1427.91 1429.29 1431.76 1437.48 1462.22  
1512.47 1636.61 1656.97 1873.03 3039.72 3040.55  
3044.14 3045.95 3046.83 3135.16 3135.63 3137.31  
3139.99 3141.01 3146.42 3147.28 3153.37 3155.62  
3156.13 3157.53 3161.72 3189.15 3199.36 3207.32

## 10 References

- [S1] A. Schäfer, M. Reißmann, A. Schäfer, W. Saak, D. Haase and T. Müller, *Angew. Chem. Int. Ed.*, 2011, **50**, 12636–12638.
- [S2] H. R. Wiltse, A. N. Johnson, R. J. Durand, W. Brennessel and R. M. Chin, *Organometallics*, 2016, **35**, 1079–1085.
- [S3] J. Suffert, *Org. Chem.*, 1989, **54**, 509–510.
- [S4] L. Omann and M. Oestreich, *Organometallics*, 2017, **36**, 767–776.
- [S5] (a) C. Wang, G. Erker, G. Kehr, K. Wedeking and R. Fröhlich, *Organometallics*, 2005, **24**, 4760–4773; (b) J. B. Lambert, L. Lin and S. Keinan, *Org. Biomol. Chem.*, 2003, **1**, 2559–2565.
- [S6] R. K. Harris, E. D. Becker, S. M. Cabral de Menezes, R. Goodfellow and P. Granger, *Pure Appl. Chem.*, 2001, **73**, 1795–1818.
- [S7] C. A. Reed, *Acc. Chem. Res.*, 2010, **43**, 121–128.
- [S8] Z. Xie, T. Jelínek, R. Bau and C. A. Reed, *J. Am. Chem. Soc.*, 1994, **116**, 1907–1913.
- [S9] C. B. Caputo, L. J. Hounjet, R. Dobrovetsky and D. W. Stephan, *Science*, 2013, **341**, 1374–1377.
- [S10] *Agilent CrysAlis PRO*, 2012, Agilent Technologies, Yarnton, UK.
- [S11] G. M. Sheldrick, *Acta Crystallogr., Sect. A.*, 1990, **46**, 467–473.
- [S12] G. M. Sheldrick, *Acta Crystallogr., Sect. A.*, 2008, **64**, 112–122.
- [S13] Mercury 3.9; Cambridge Crystallographic Data Center:  
<https://www.ccdc.cam.ac.uk/solutions/csd-system/components/mercury/>.
- [S14] A. D. Bochevarov, E. Harder, T. F. Hughes, J. R. Greenwood, D. A. Braden, D. M. Philipp, D. Rinaldo, M. D. Halls, J. Zhang and R. A. Friesner, *Int. J. Quantum Chem.*, 2013, **113**, 2110–2142.
